# Supplementary material for: Relationships of dietary habits with prostate cancer risk: results from Mendelian randomization analyses and the National Health and Nutrition Examination Survey
Source: Royal Society of Chemistry journal article supplement (doi:10.1039/d4fo03859b), 2024-01-01
Supplement: d4fo03859b1.pdf [file d4fo03859b1.pdf]

Figure S1

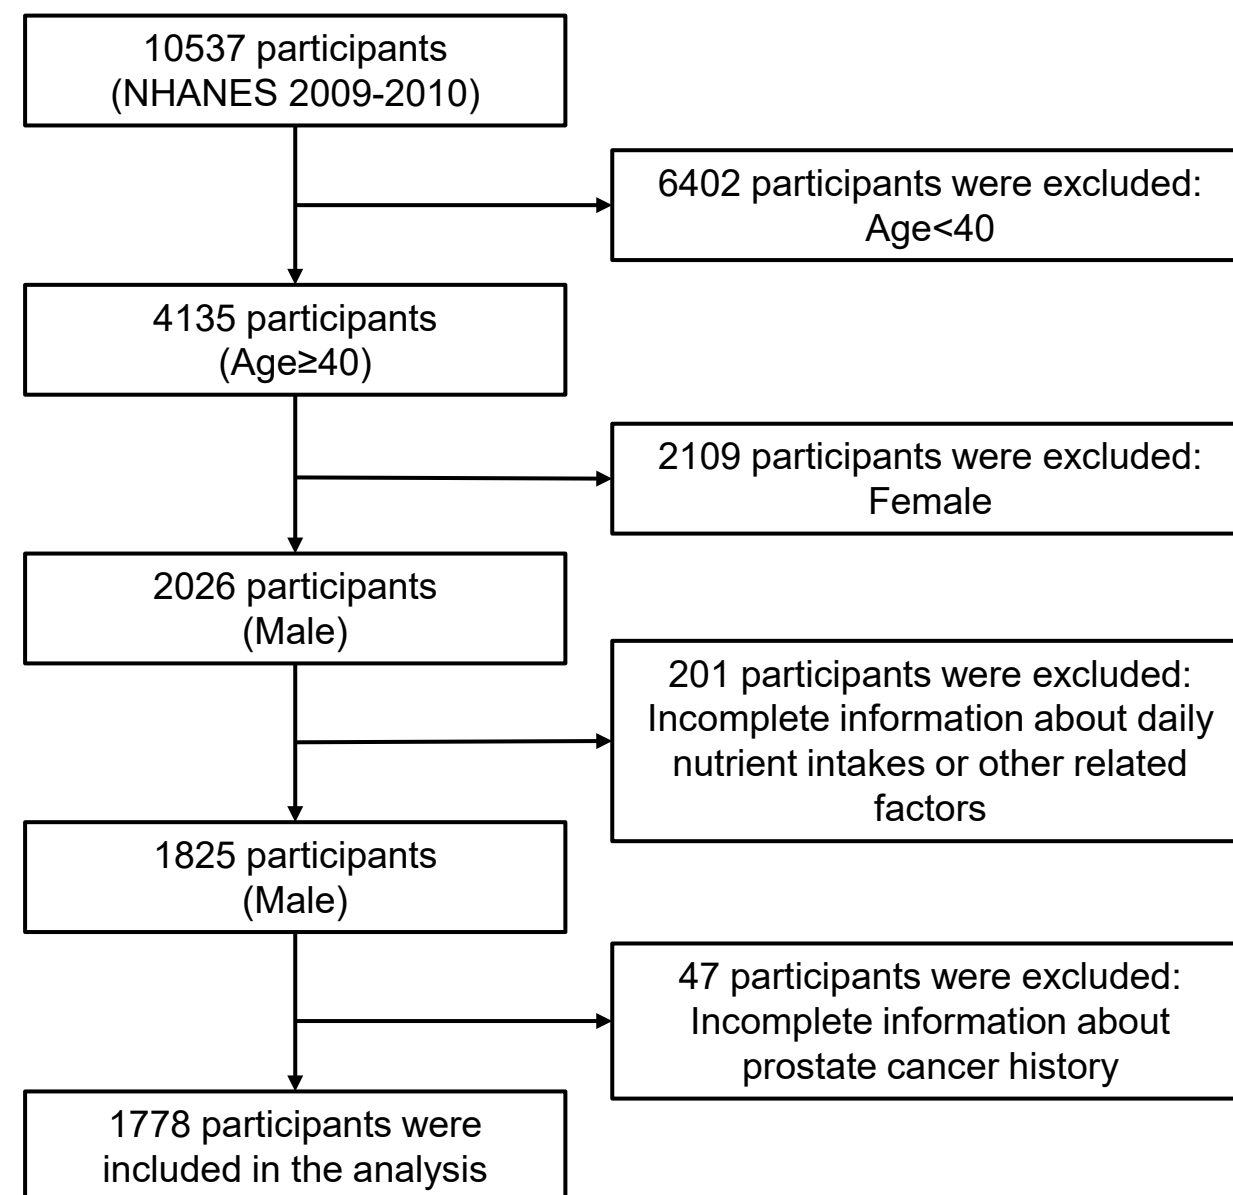



Figure S3

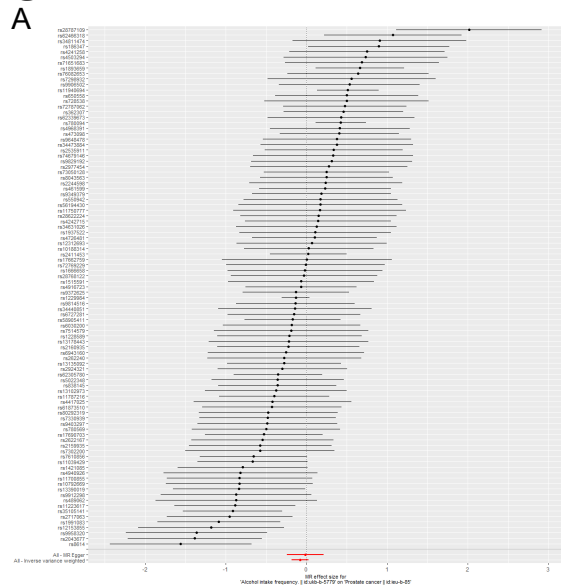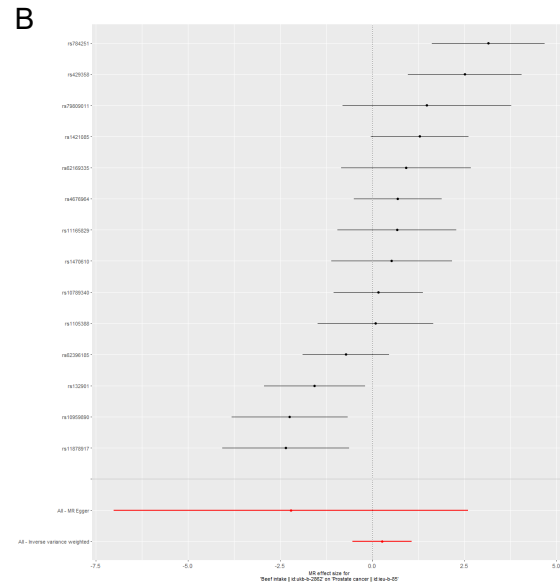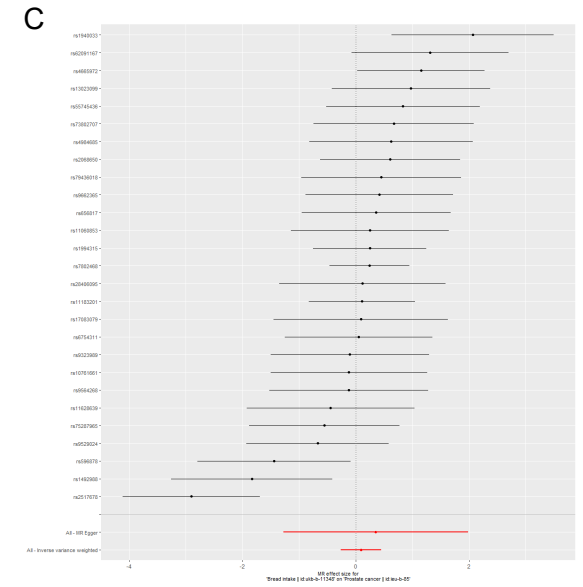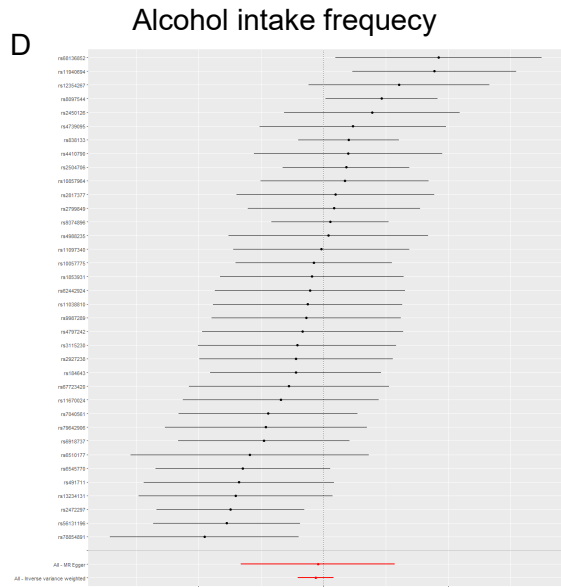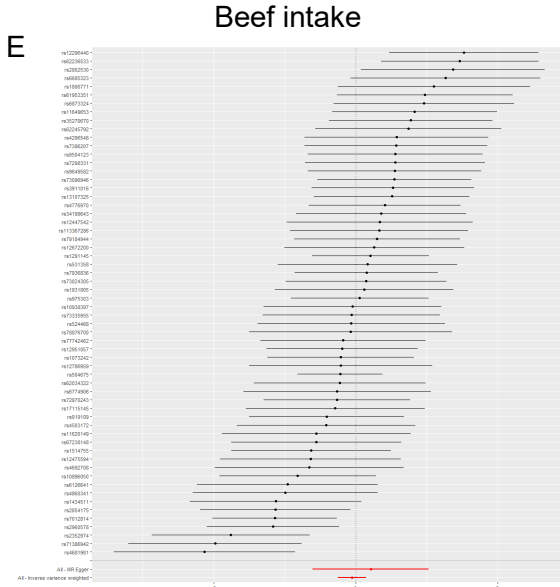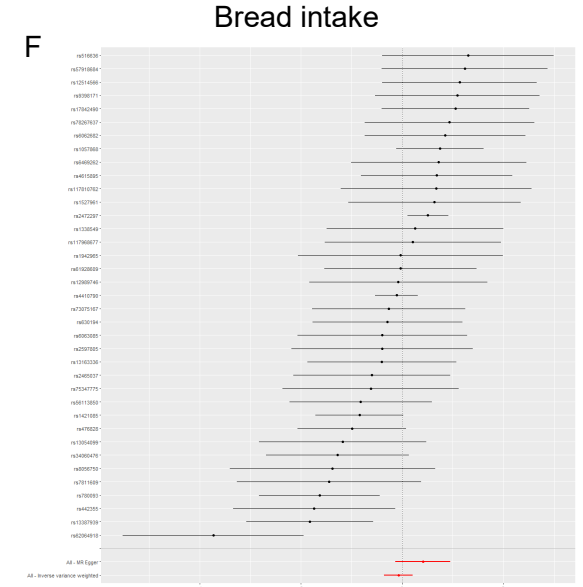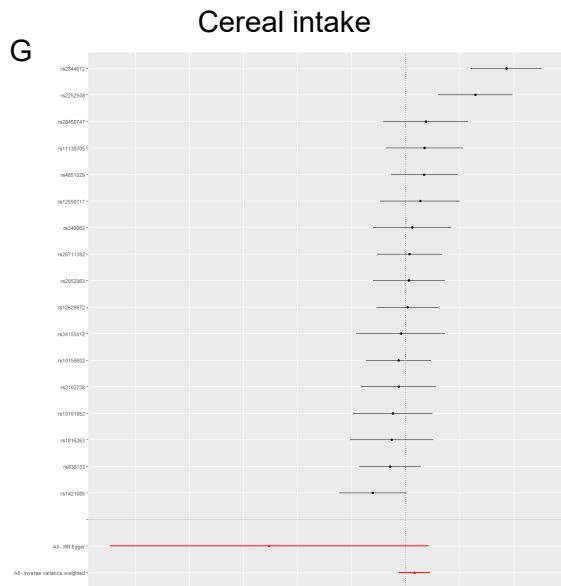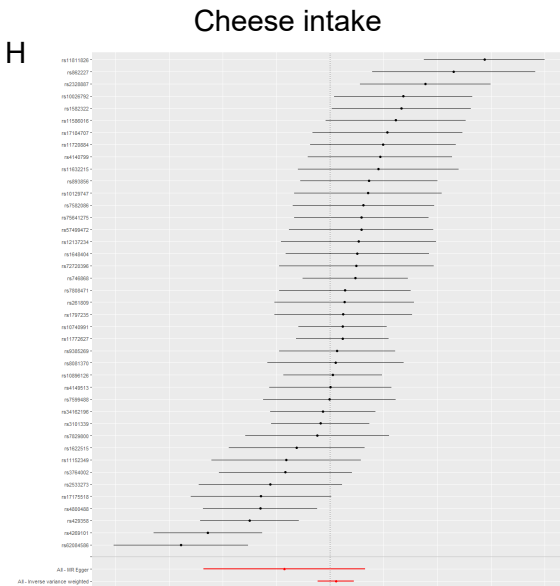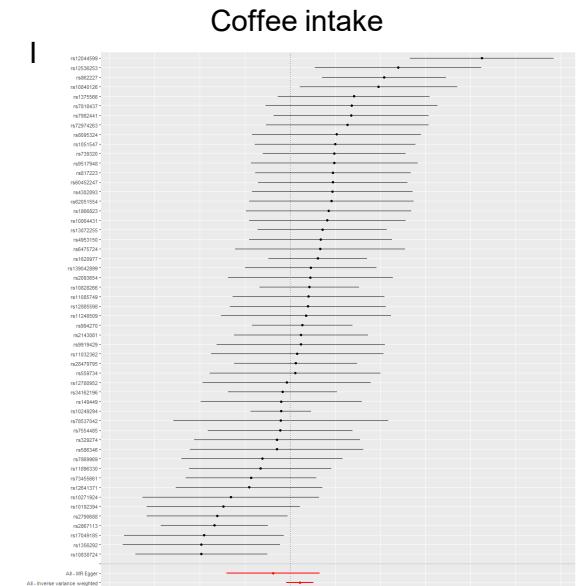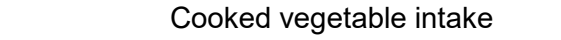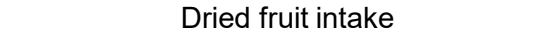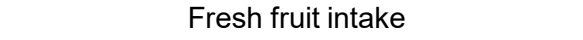

Figure S3 (continue)

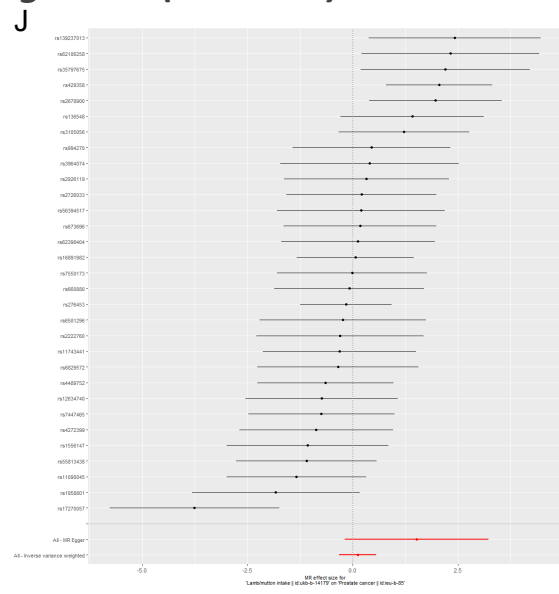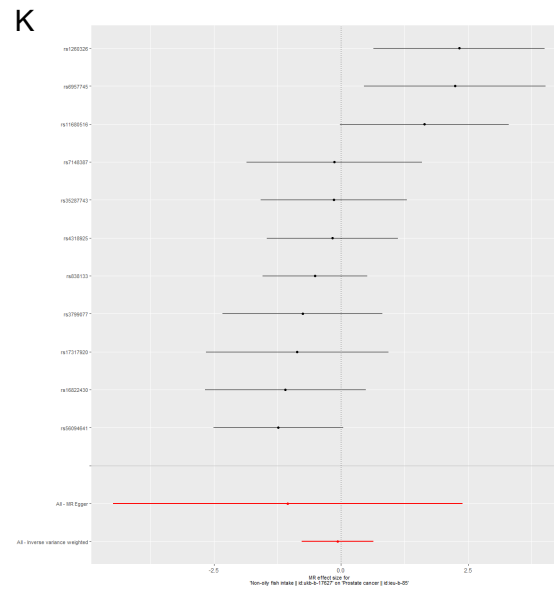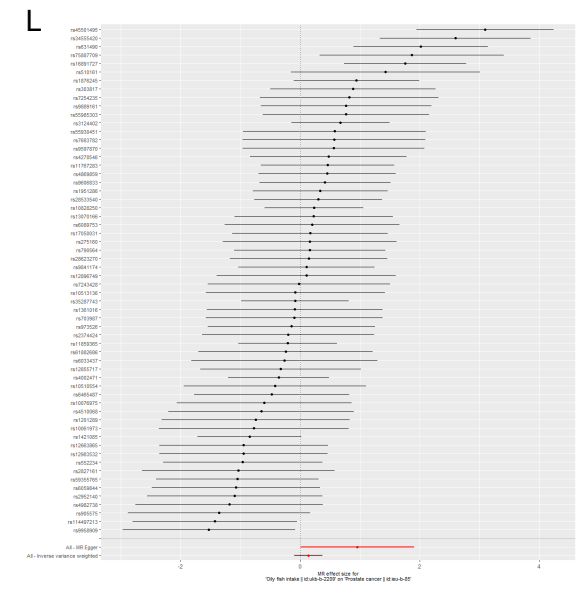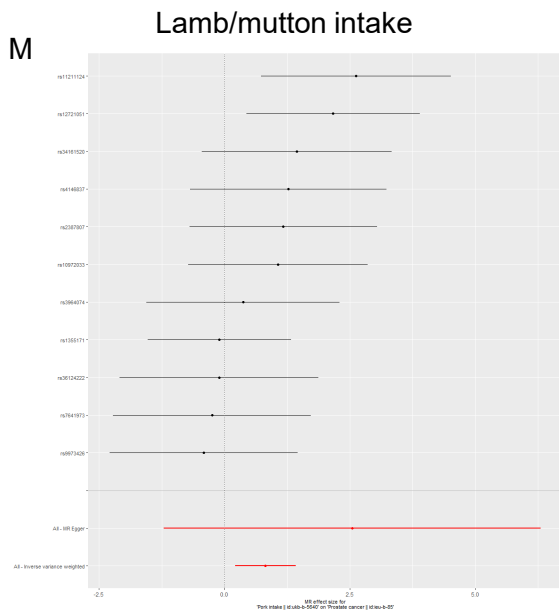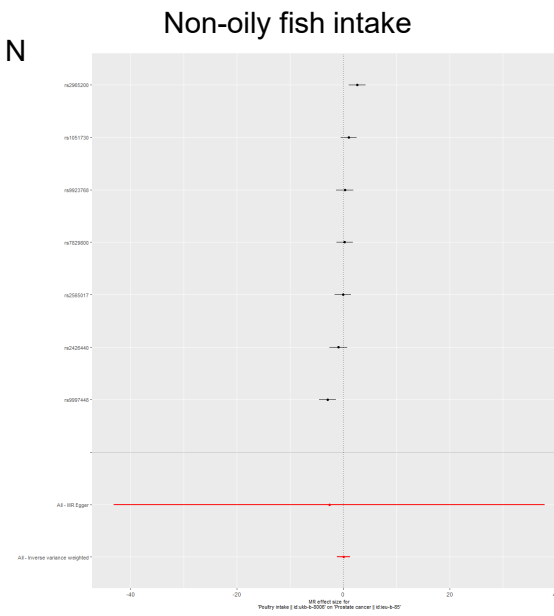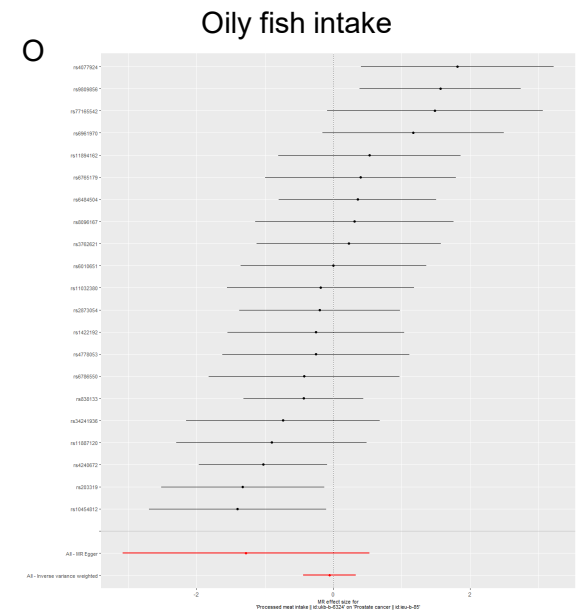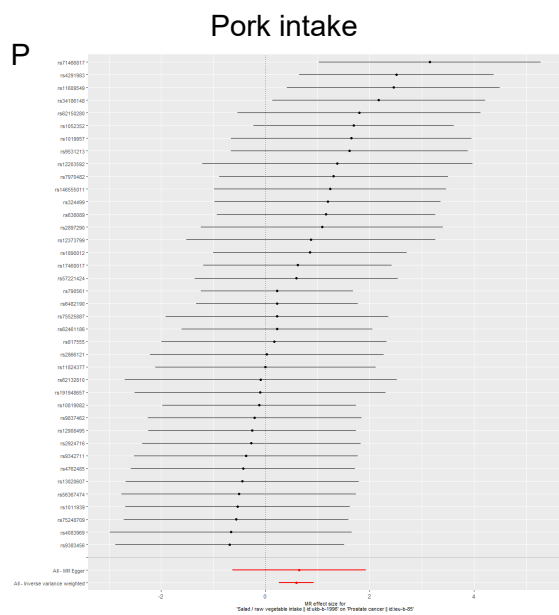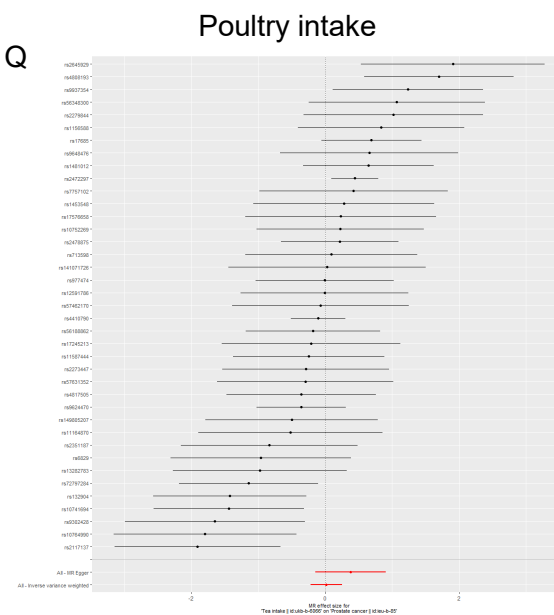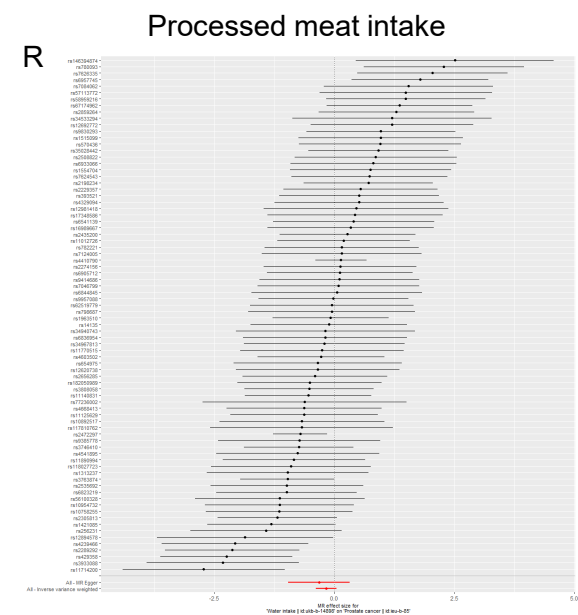

Salad/raw vegetable intake

Tea intake

Water intake

Figure S4

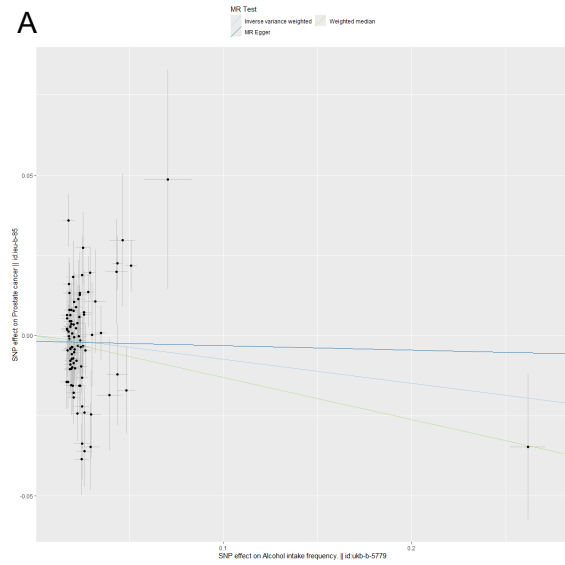

Alcohol intake frequency

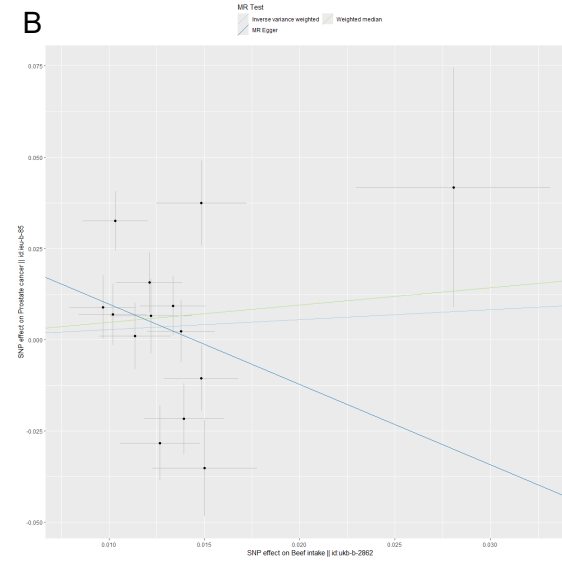

Beef intake

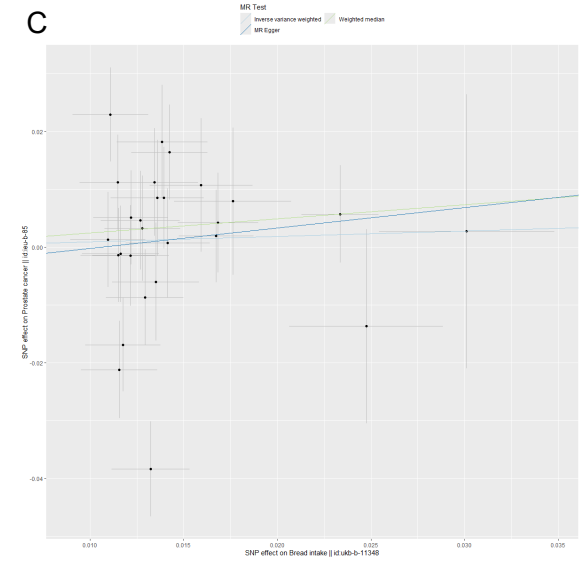

Bread intake

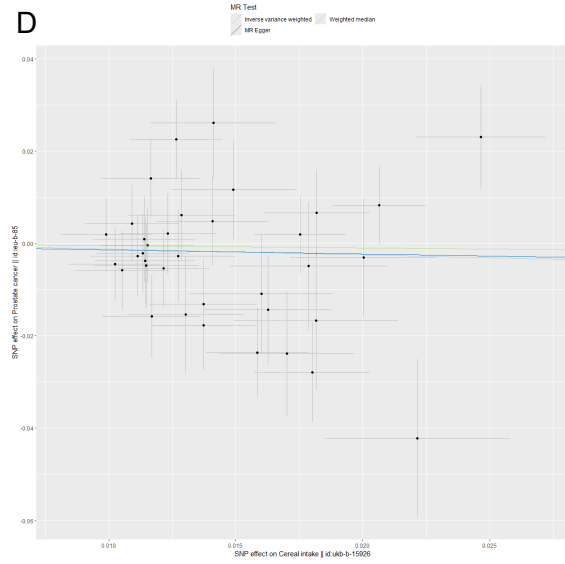

Cereal intake

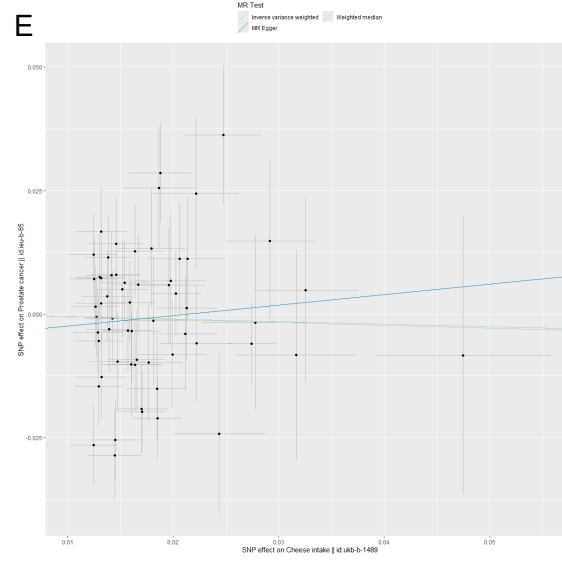

Cheese intake

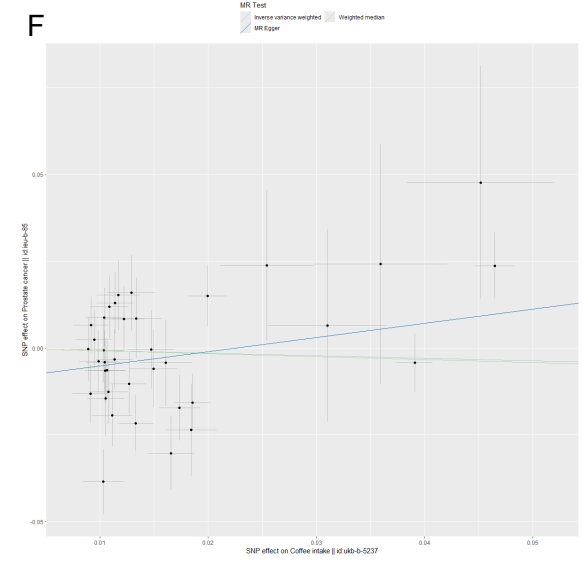

Coffee intake

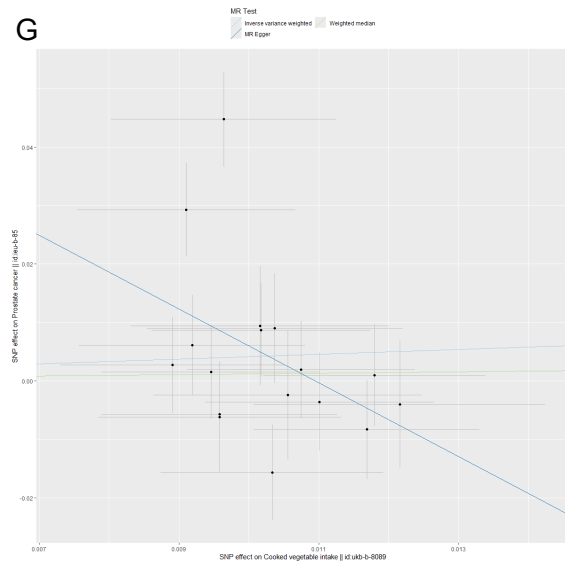

Cooked vegetable intake

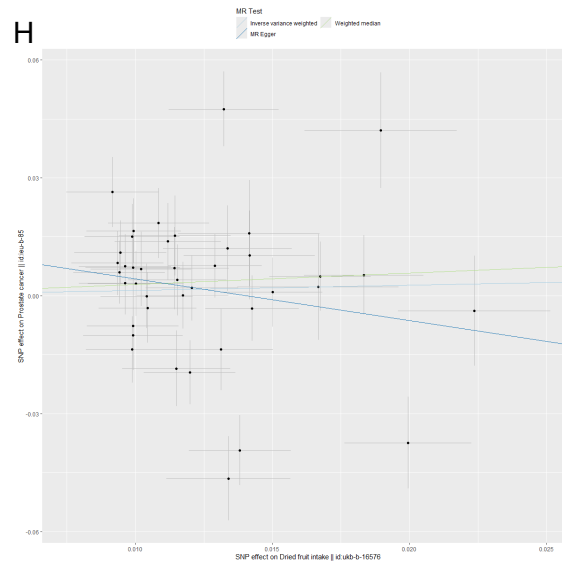

Dried fruit intake

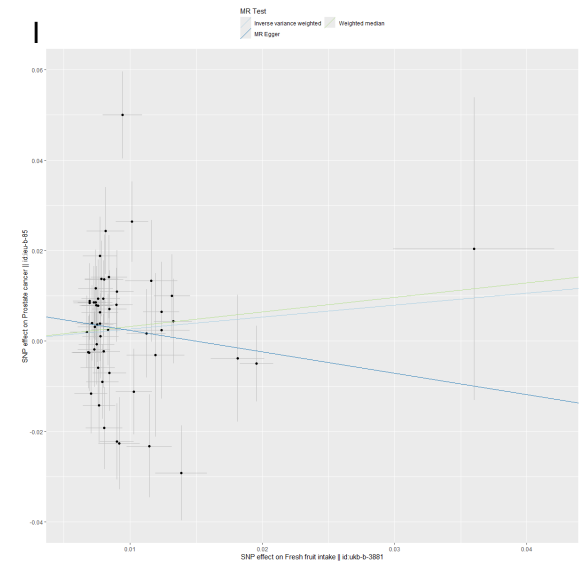

Fresh fruit intake

# Figure S4 (continue)

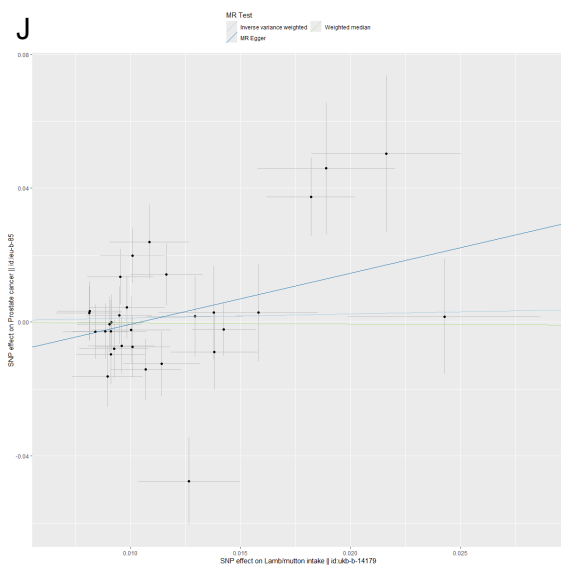

Lamb/mutton intake

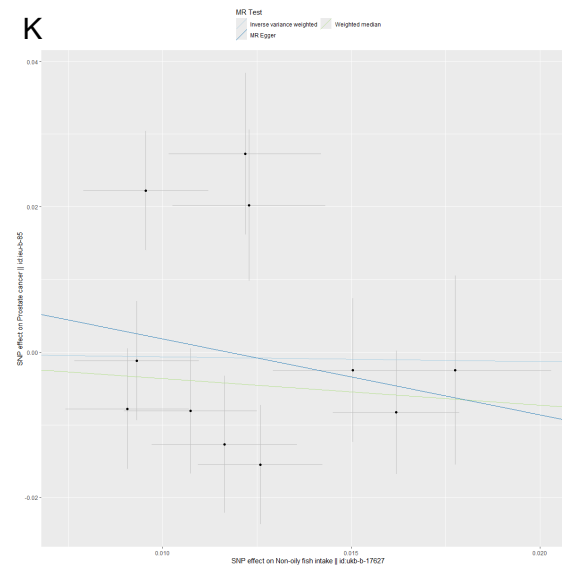

Non-oily fish intake

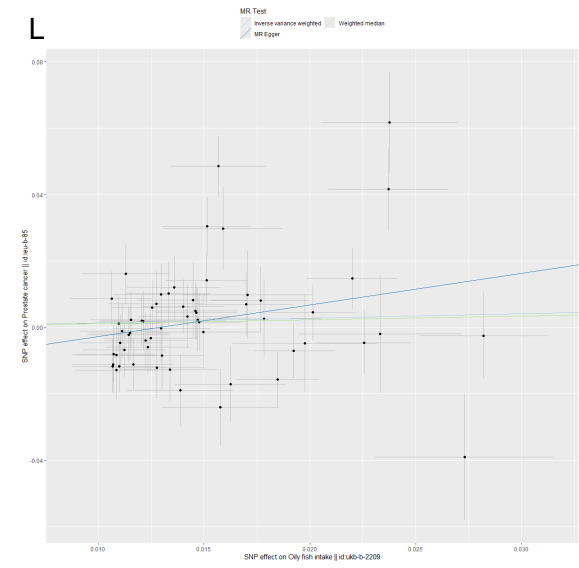

Oily fish intake

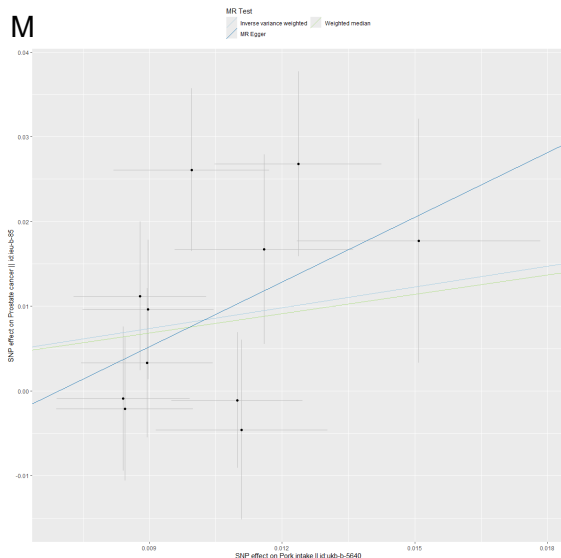

Pork intake

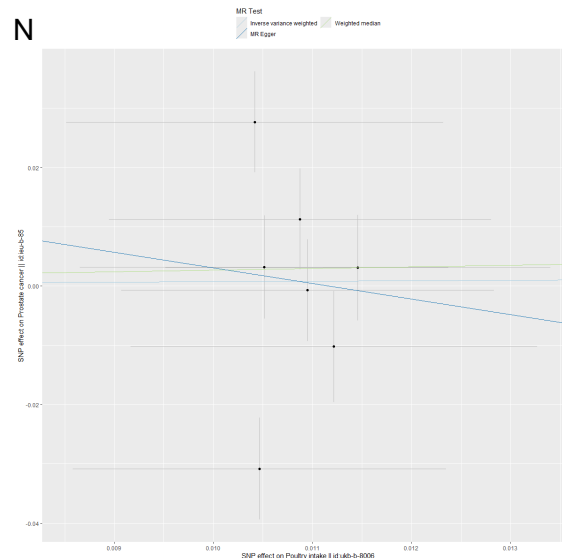

Poultry intake

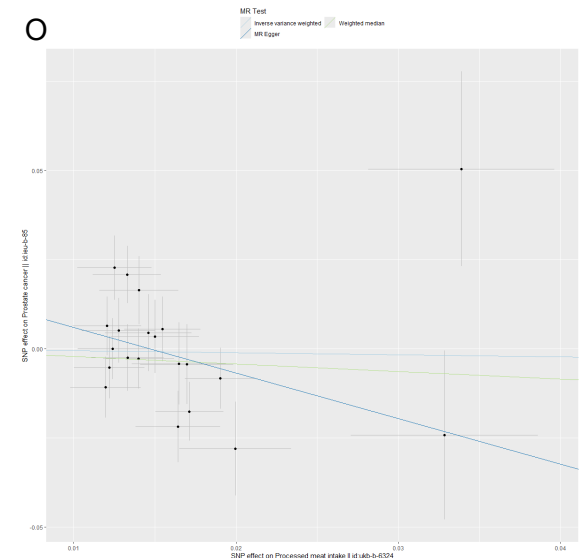

Processed meat intake

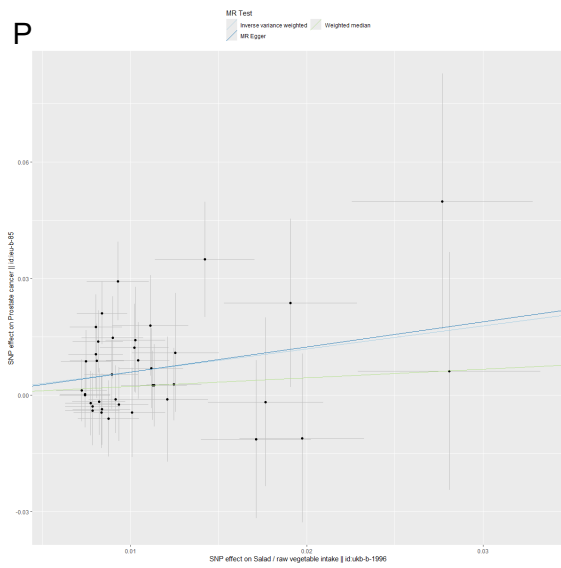

Salad/raw vegetable intake

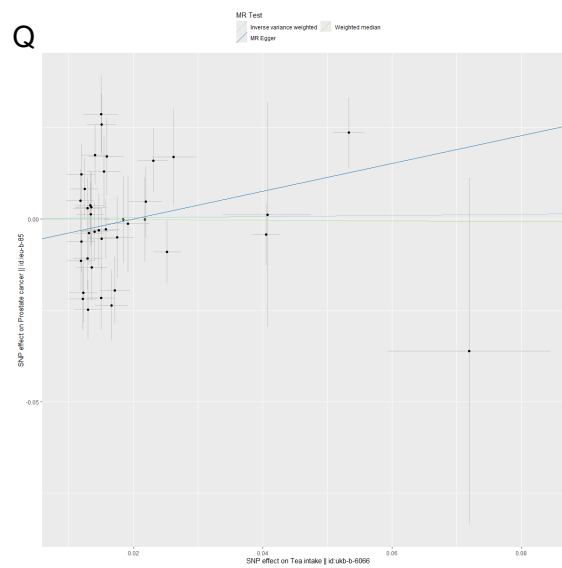

Tea intake

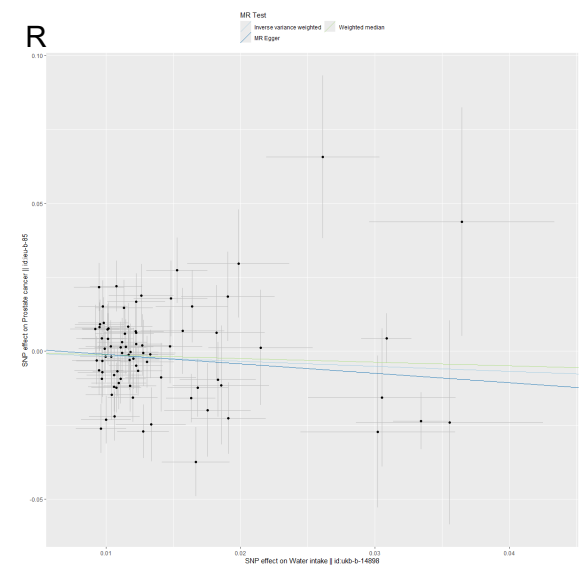

Water intake

Figure S5

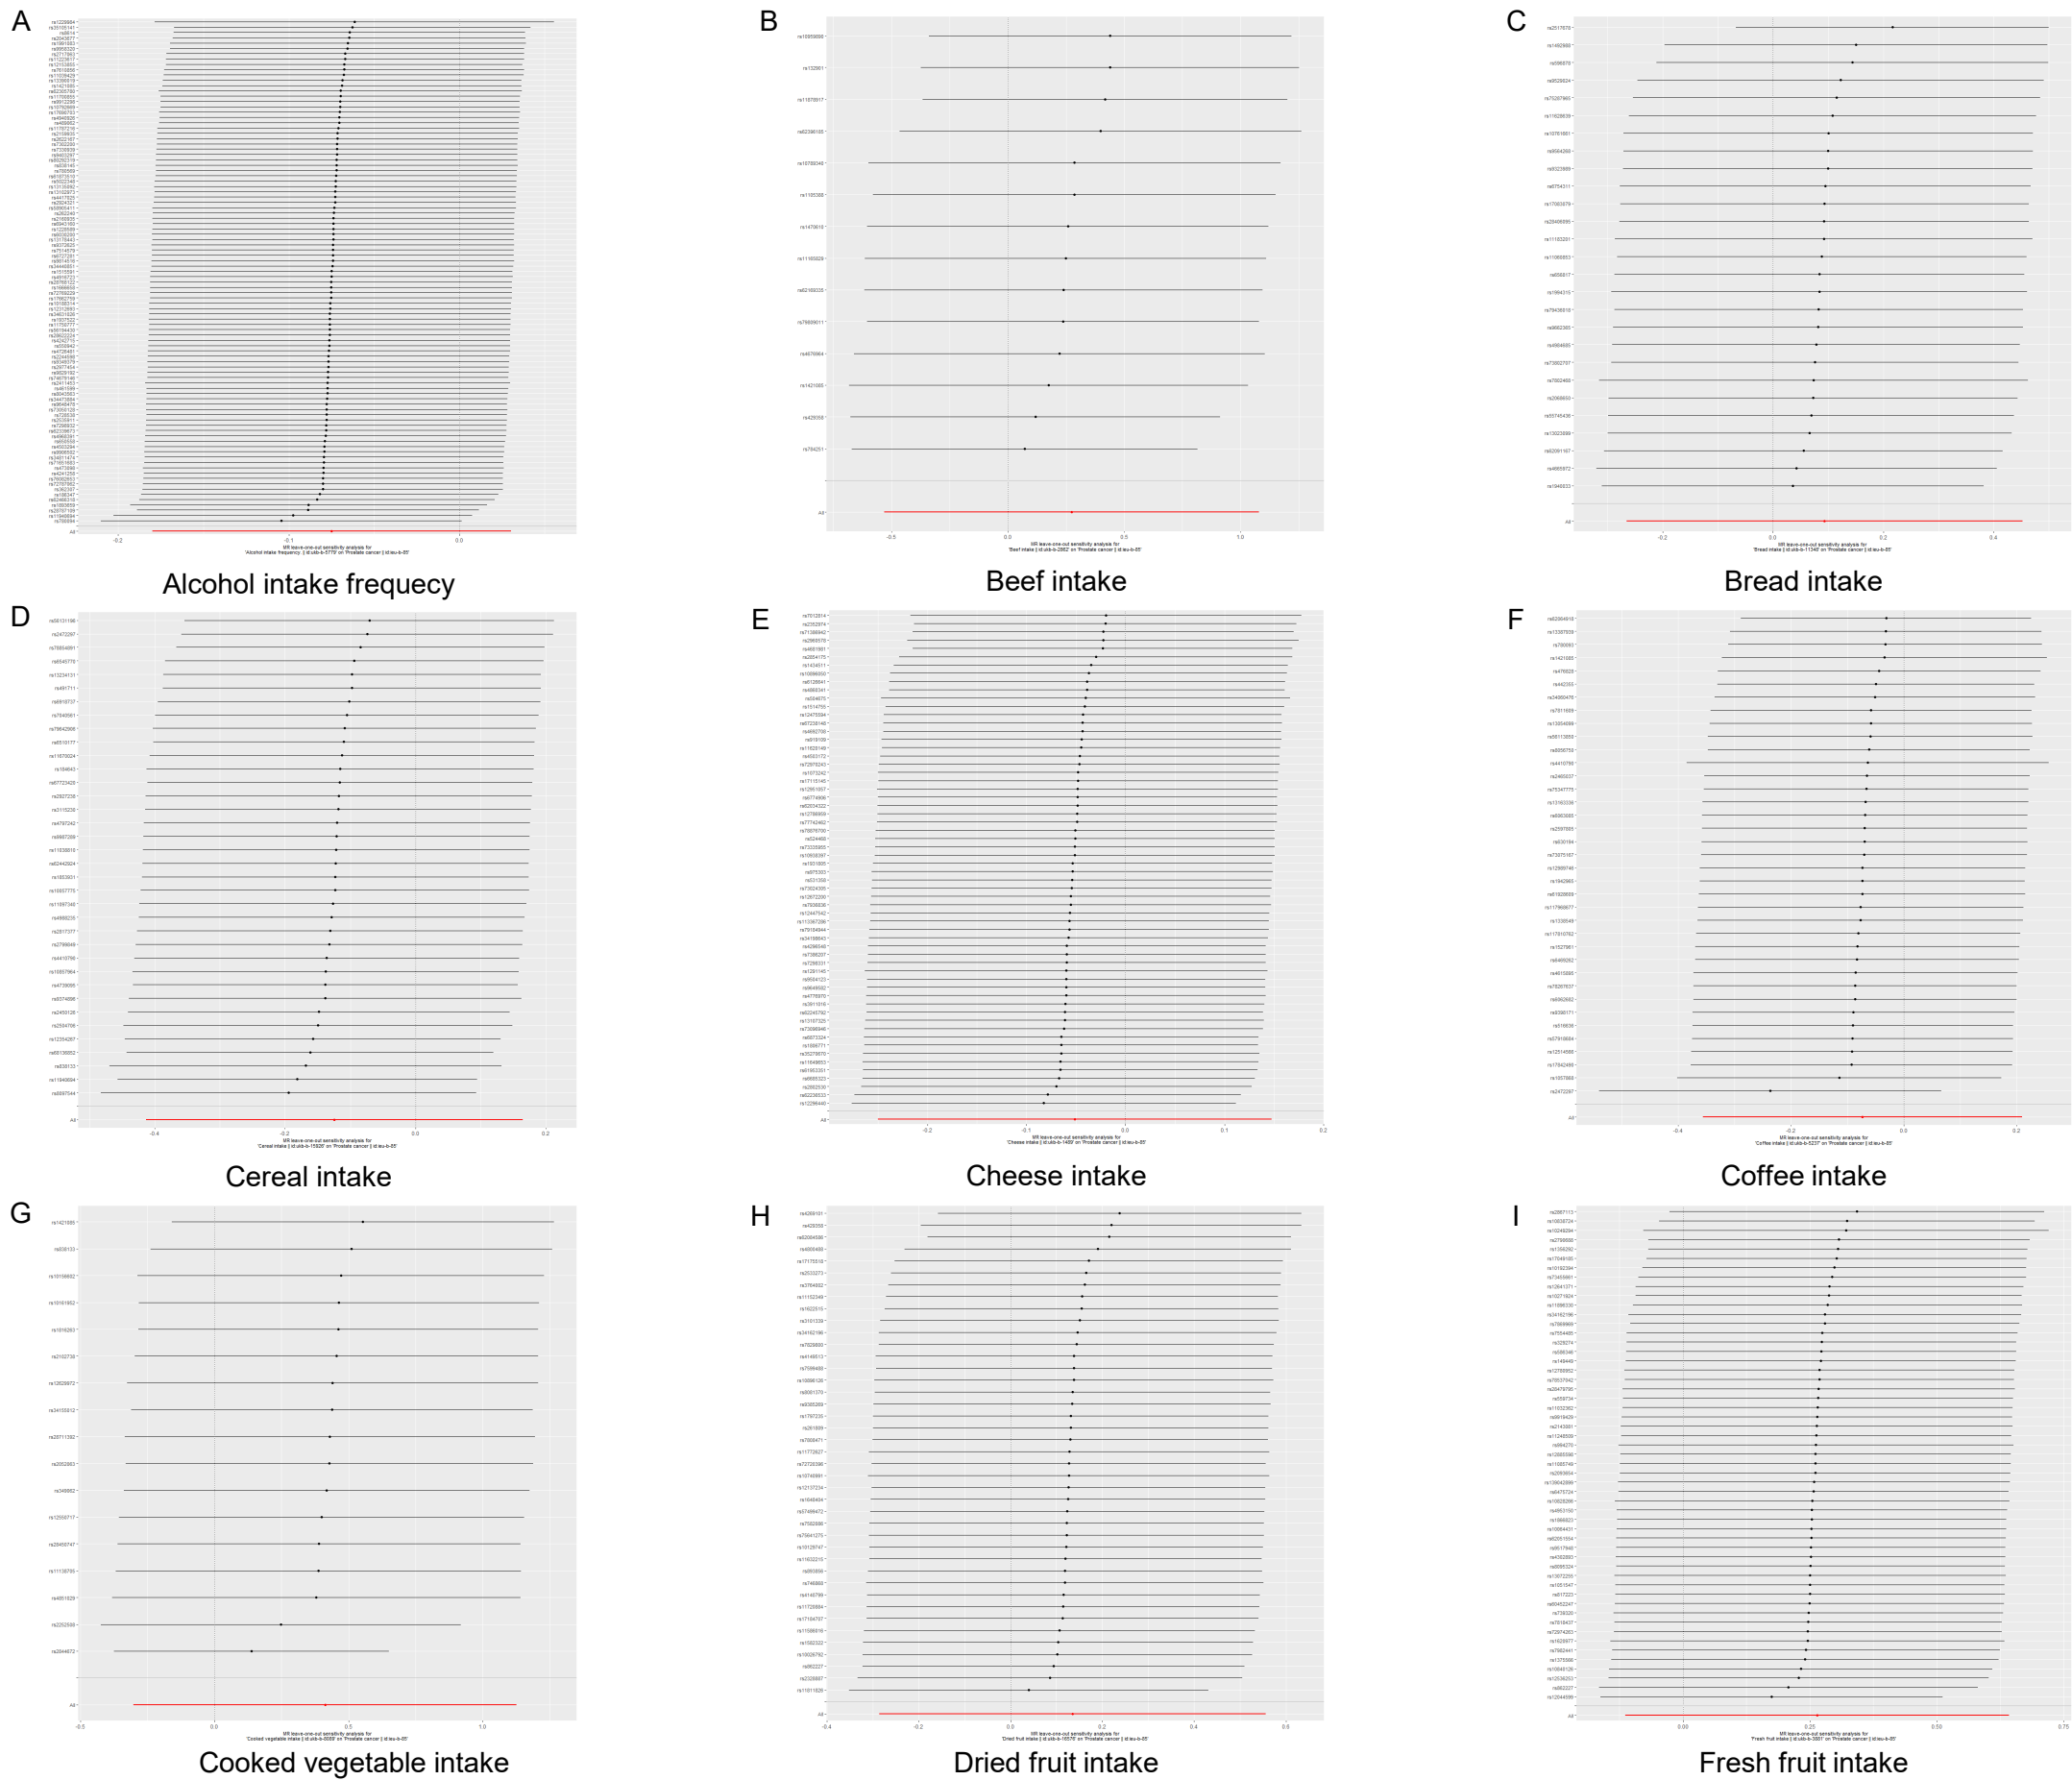

**Figure S5 (continue)**

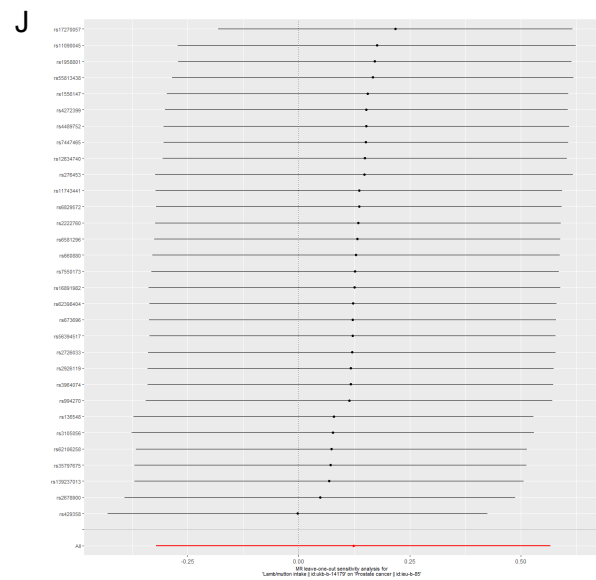

**Lamb/mutton intake**

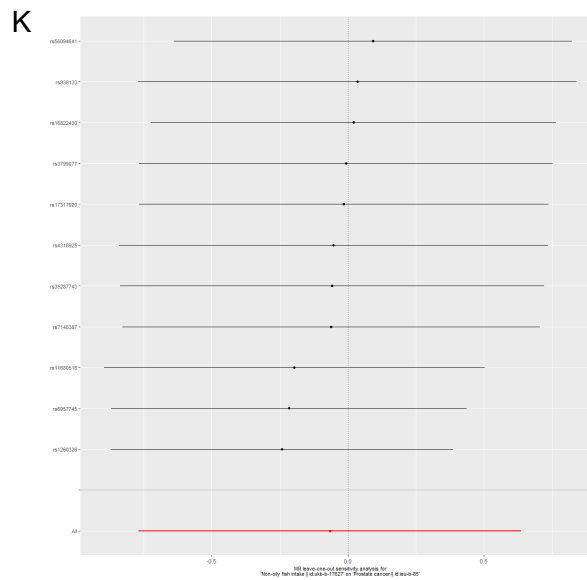

**Non-oily fish intake**

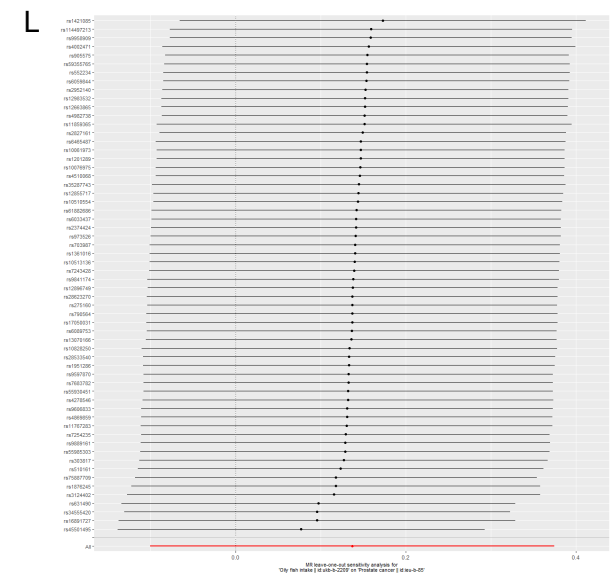

**Oily fish intake**

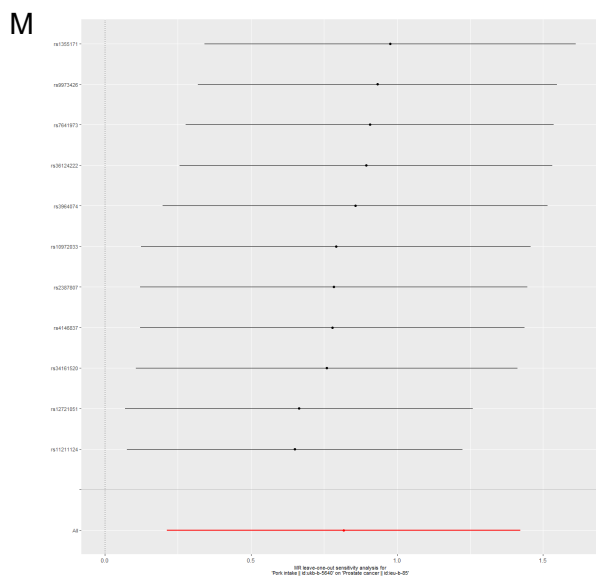

**Pork intake**

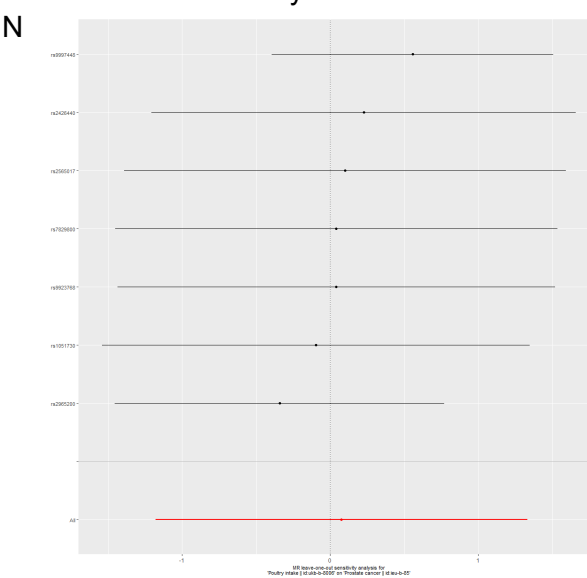

**Poultry intake**

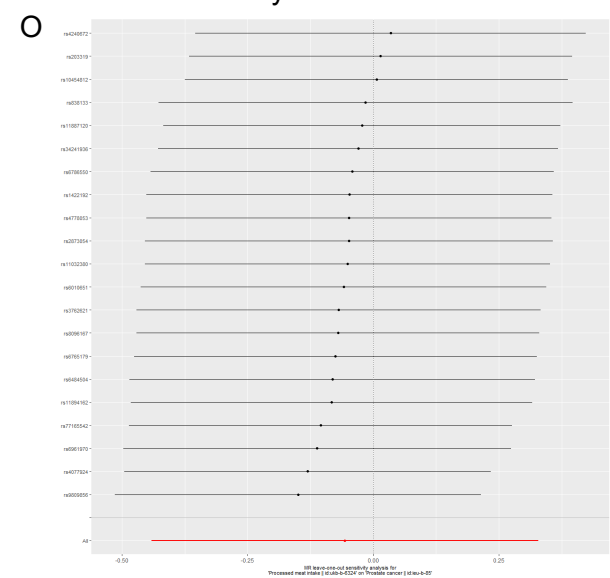

**Processed meat intake**

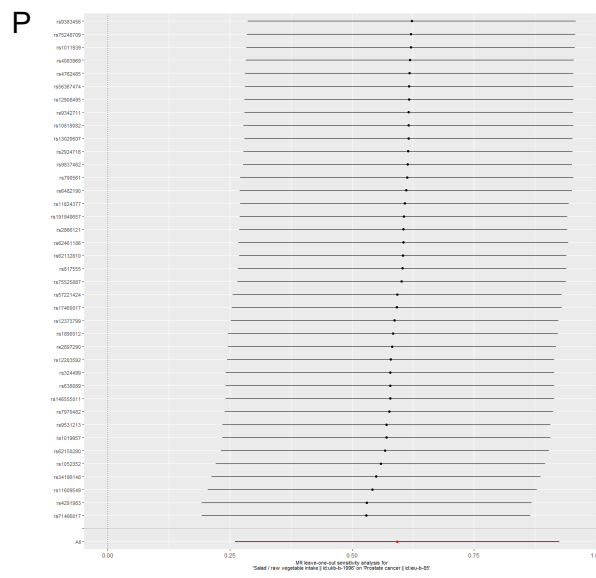

**Salad/raw vegetable intake**

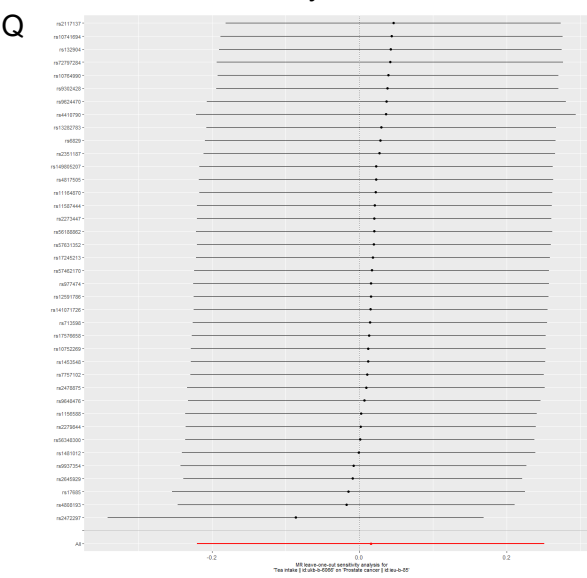

**Tea intake**

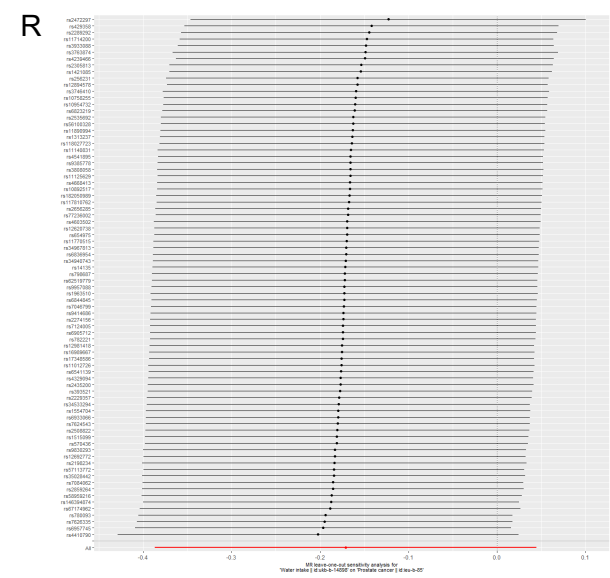

**Water intake**



**Figure S6**

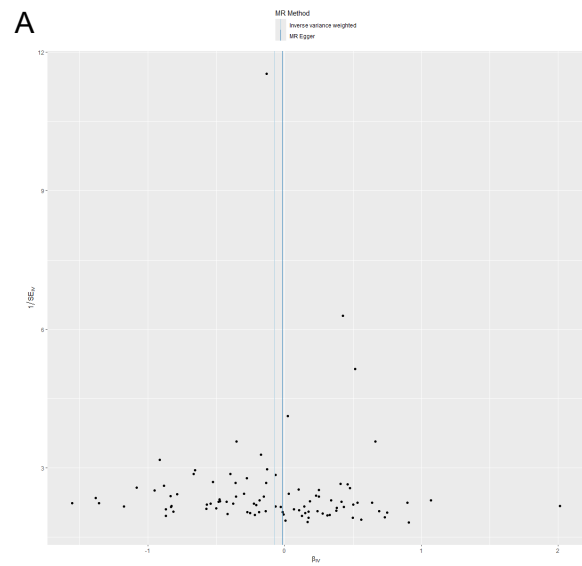

Alcohol intake frequency

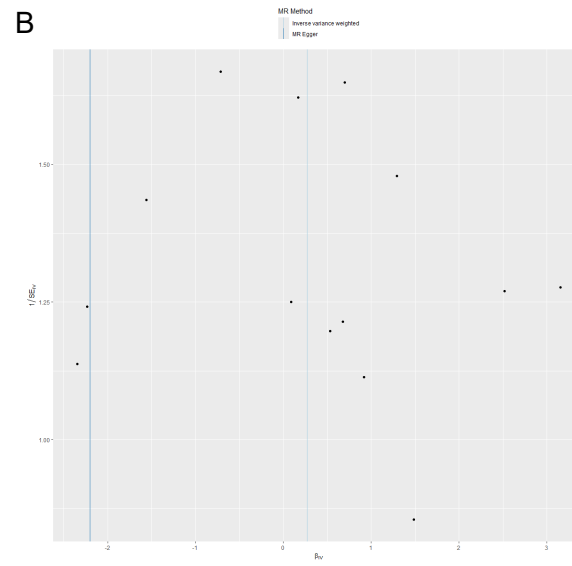

Beef intake

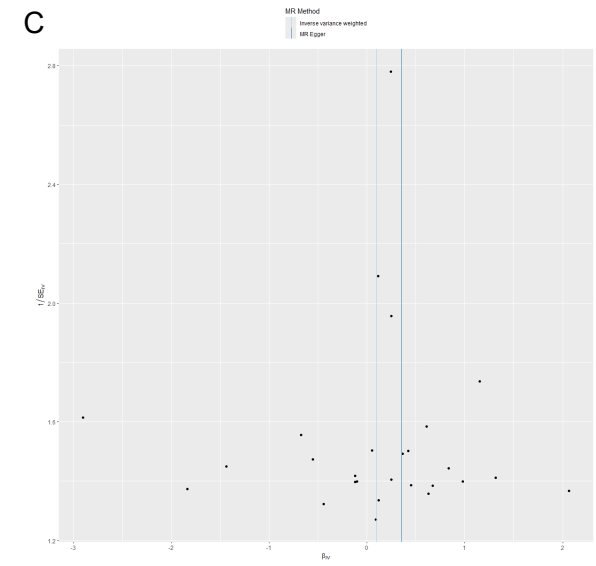

Bread intake

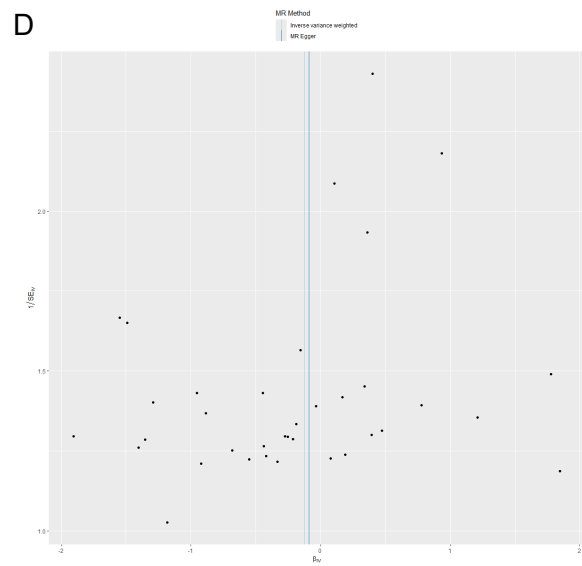

Cereal intake

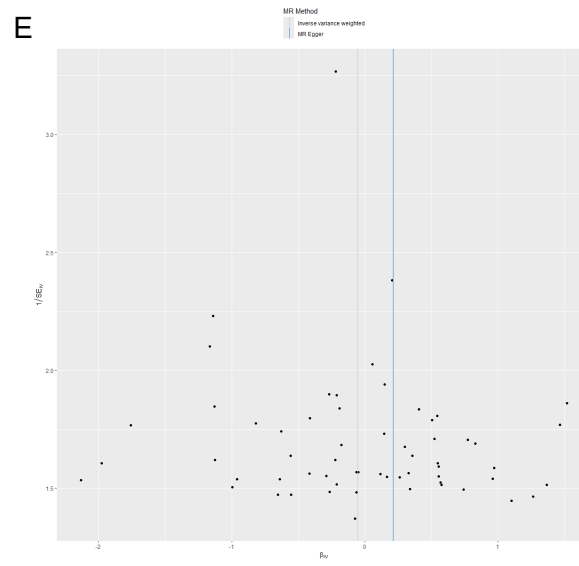

Cheese intake

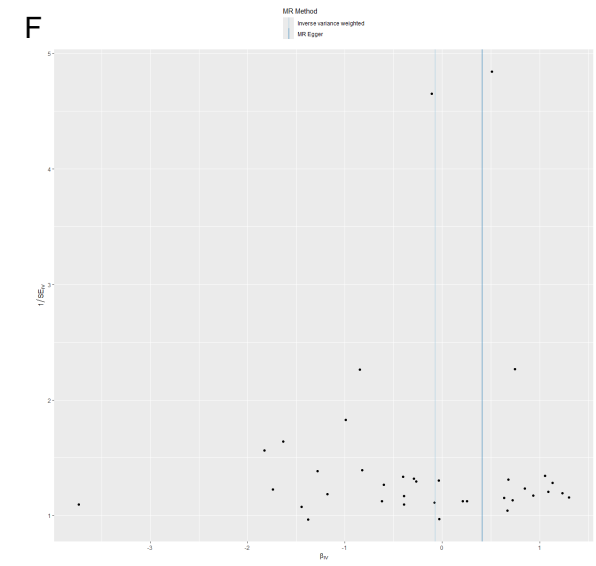

Coffee intake

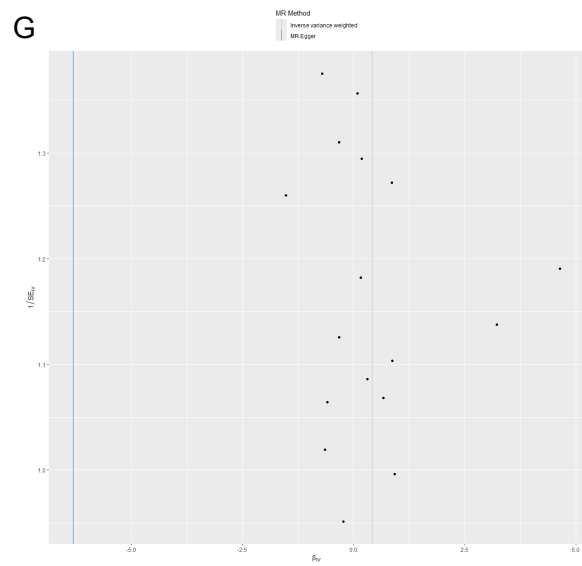

Cooked vegetable intake

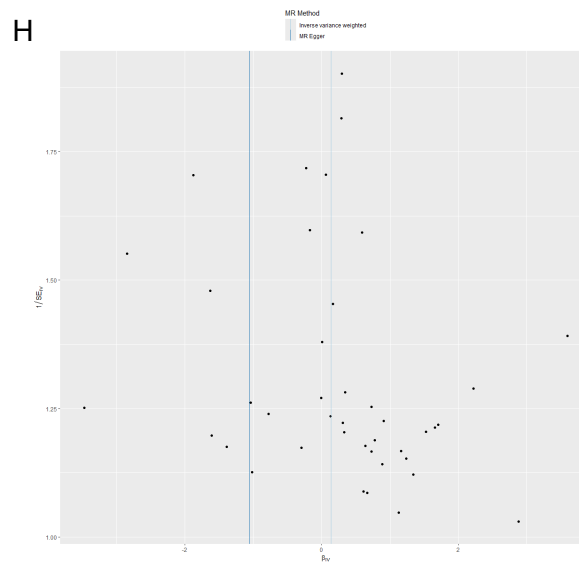

Dried fruit intake

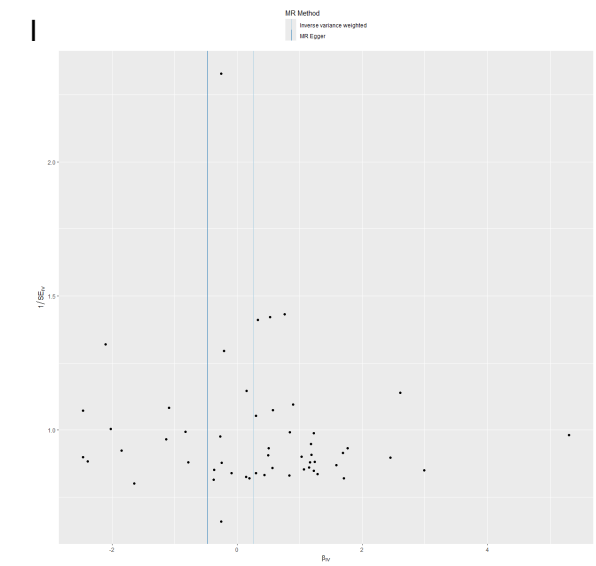

Fresh fruit intake

Figure S6 (continue)

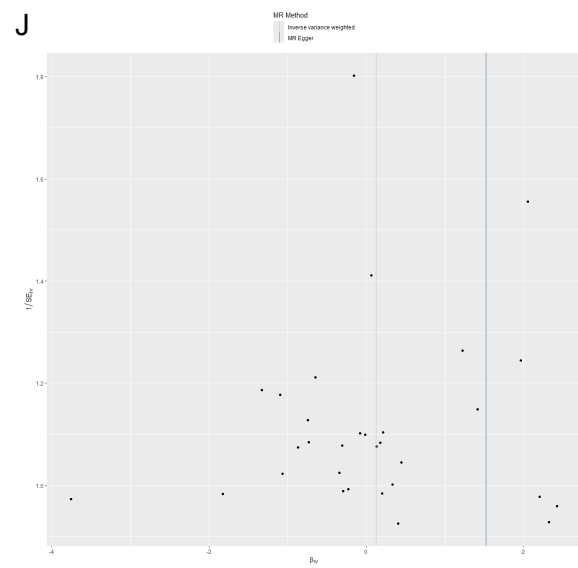

Lamb/mutton intake

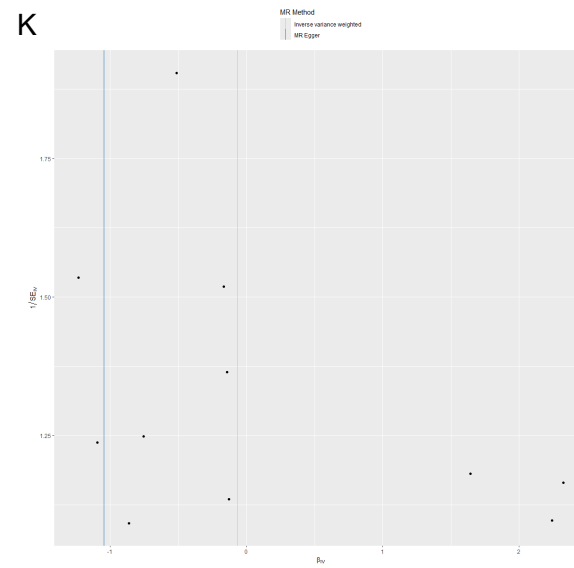

Non-oily fish intake

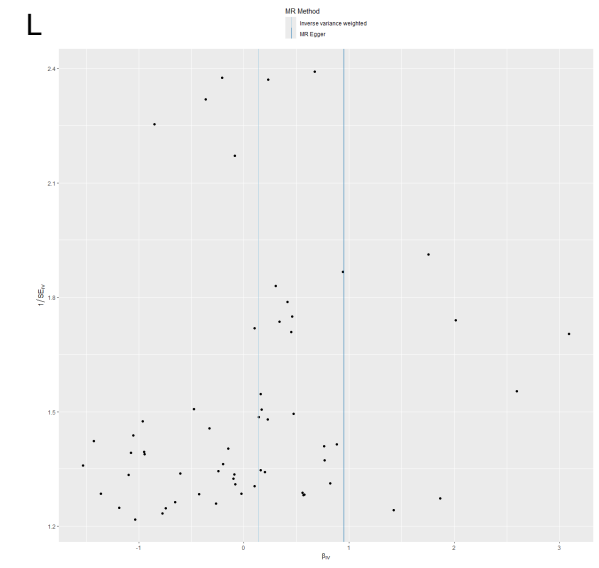

Oily fish intake

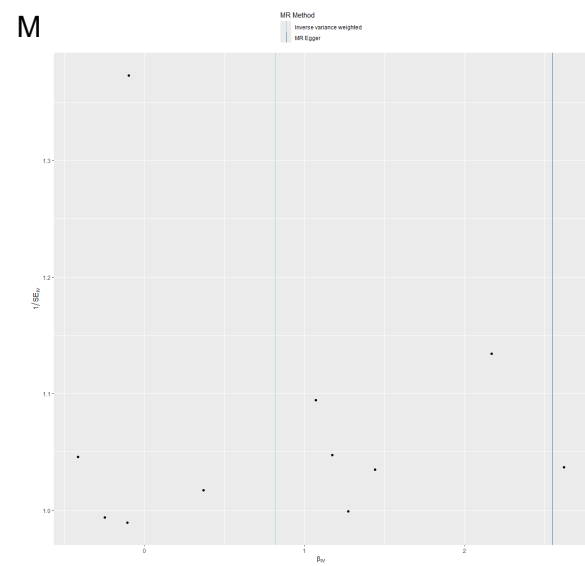

Pork intake

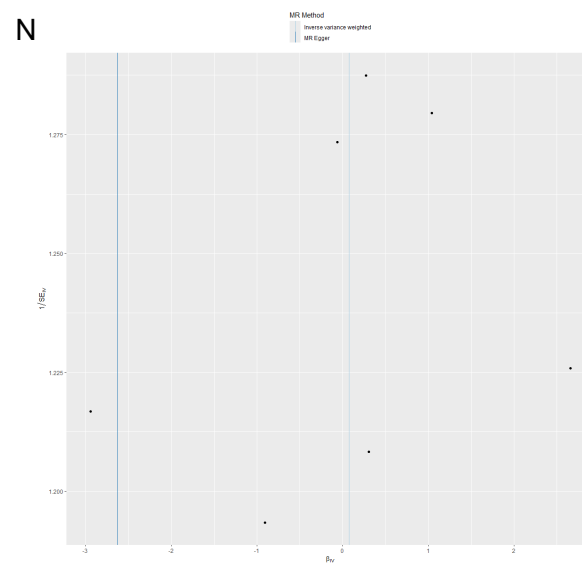

Poultry intake

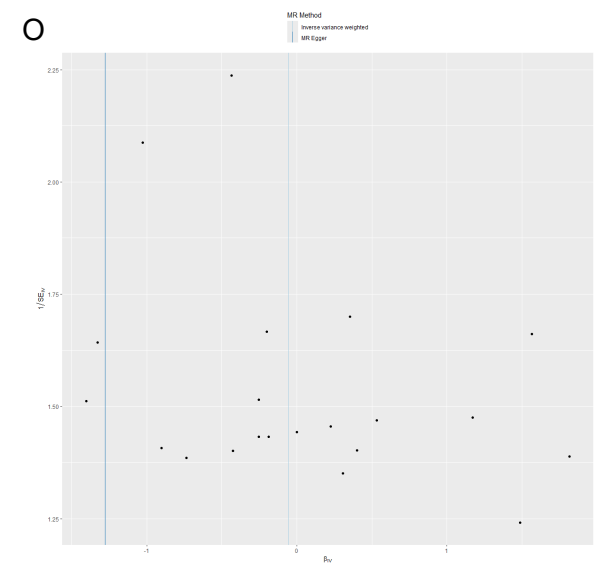

Processed meat intake

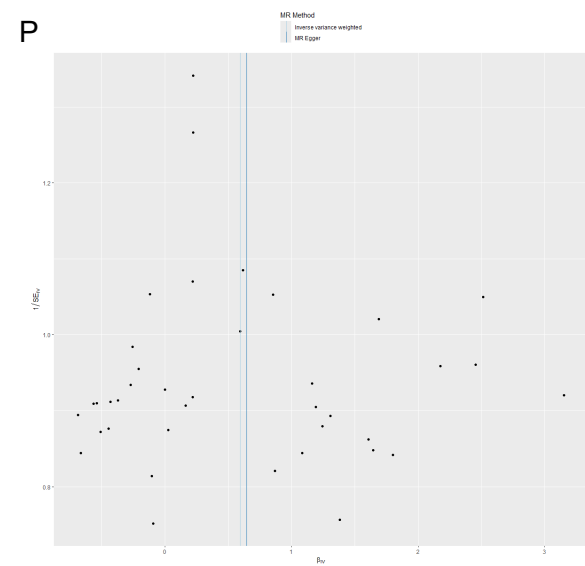

Salad/raw vegetable intake

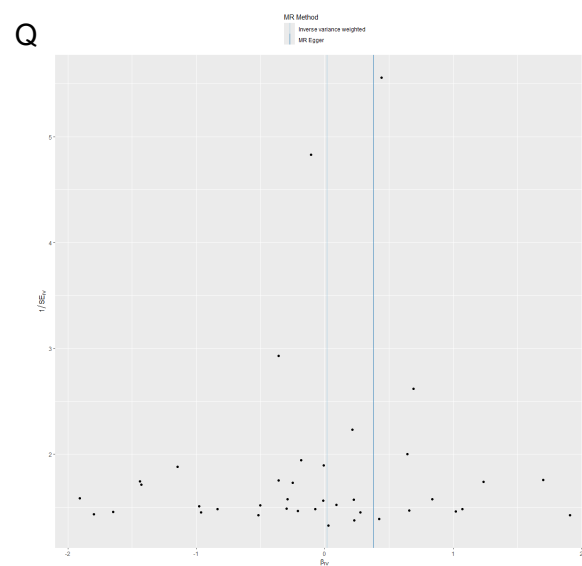

Tea intake

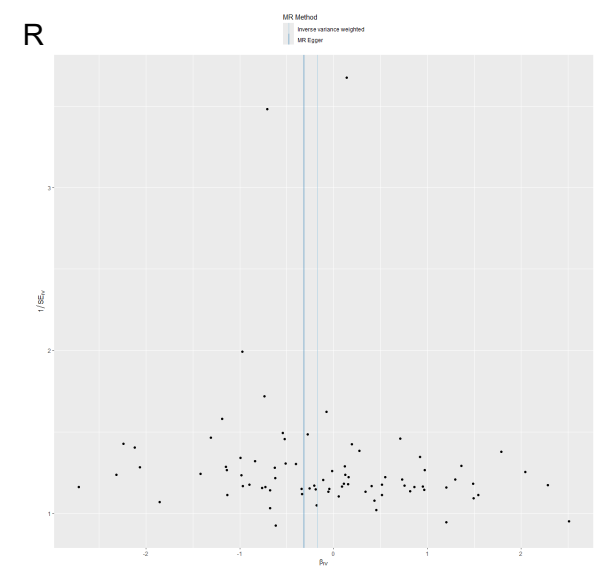

Water intake

**Figure S7**

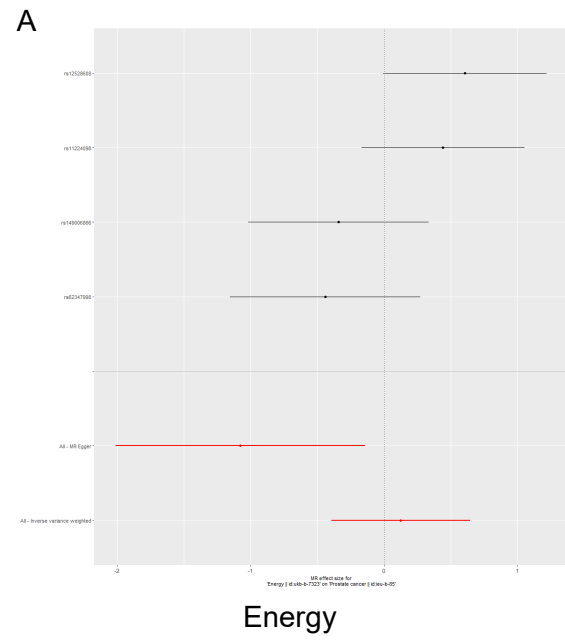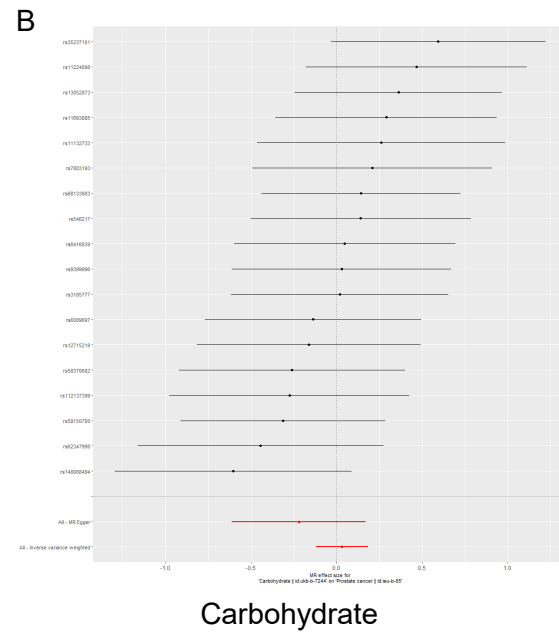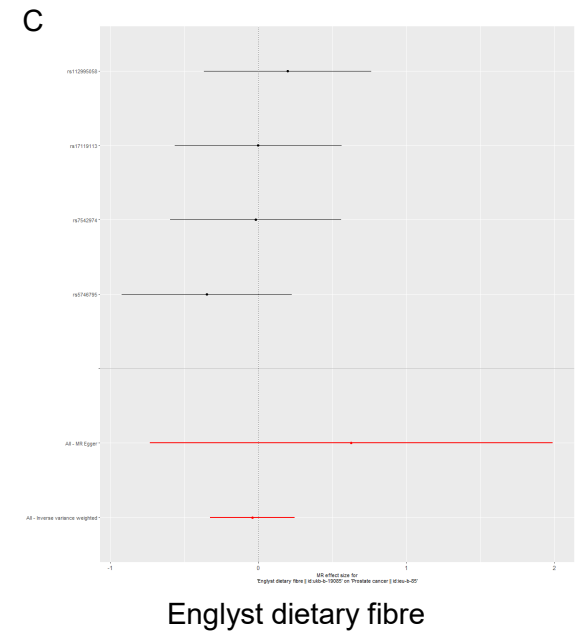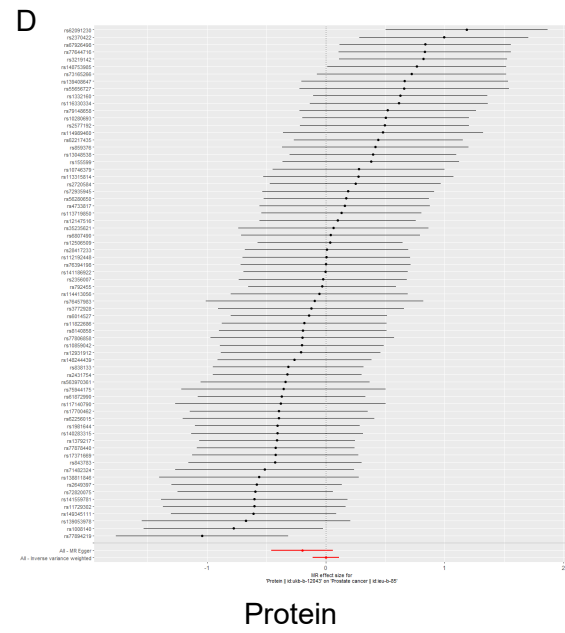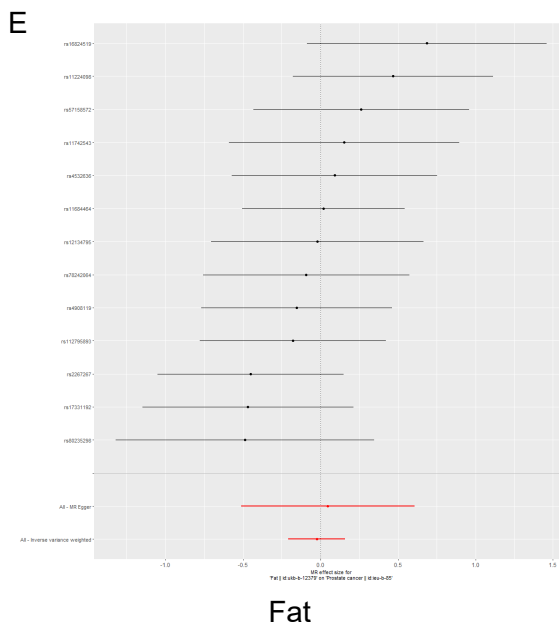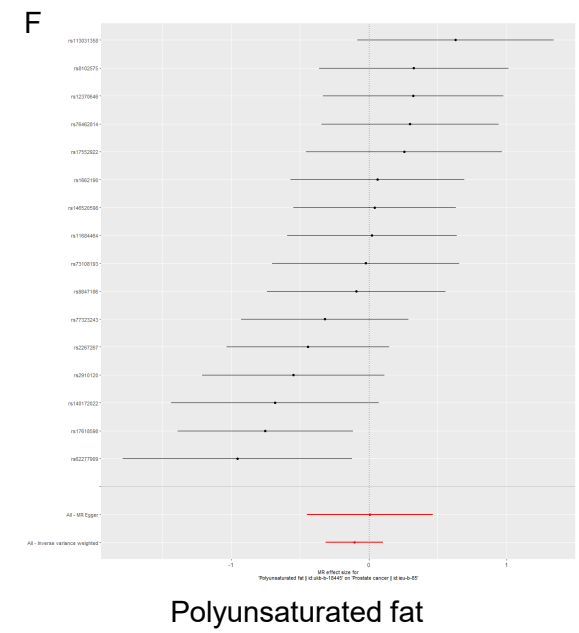

Figure S7 (continue)

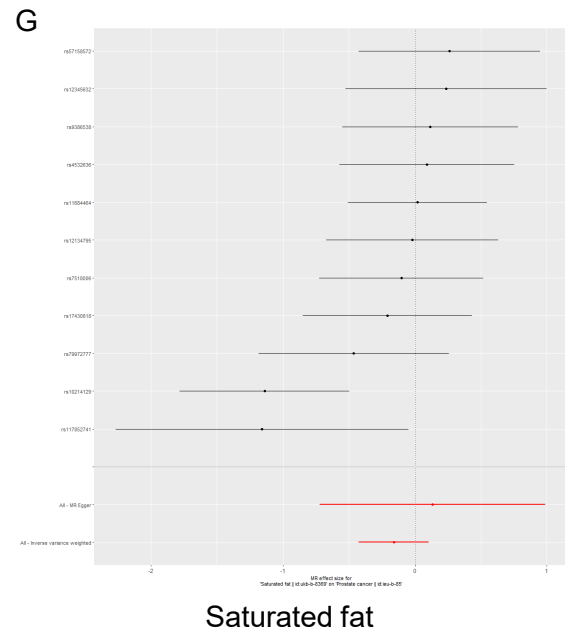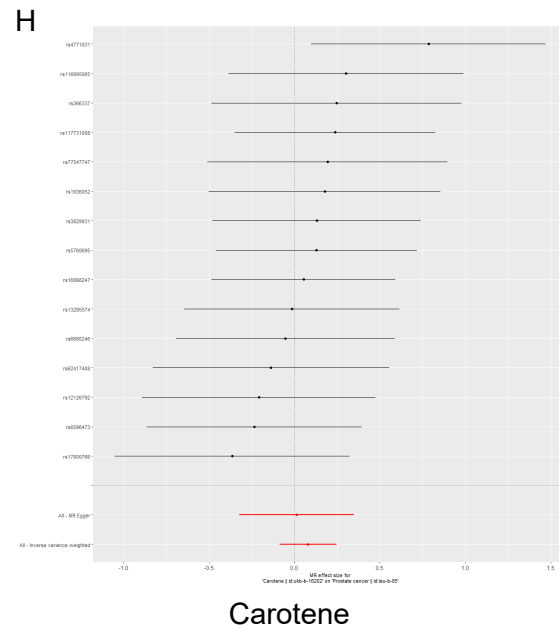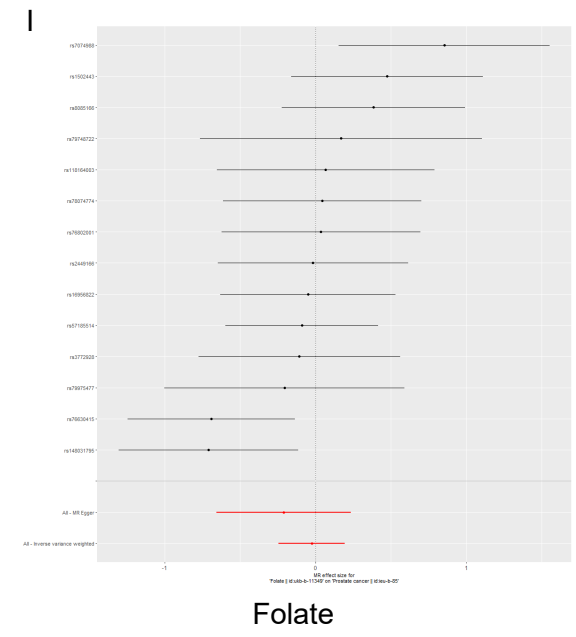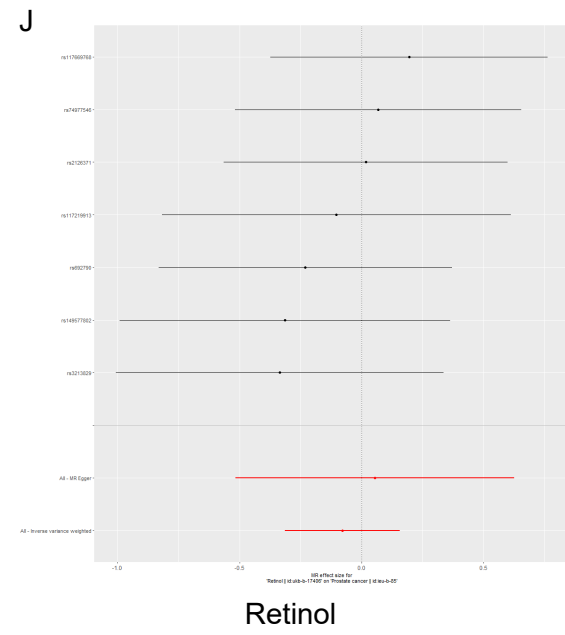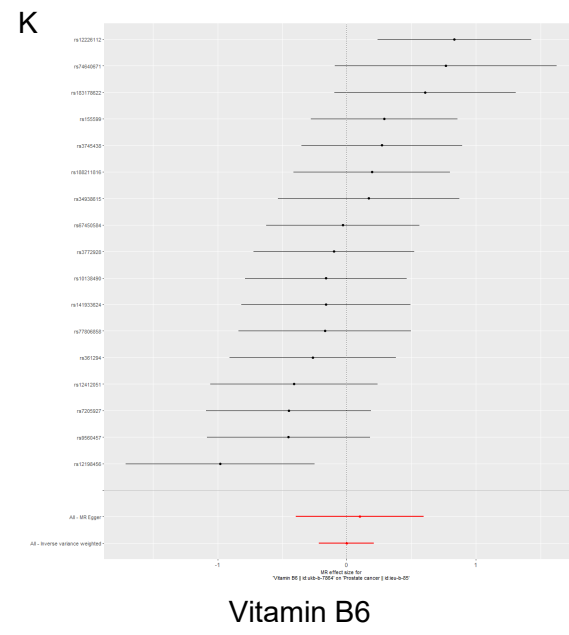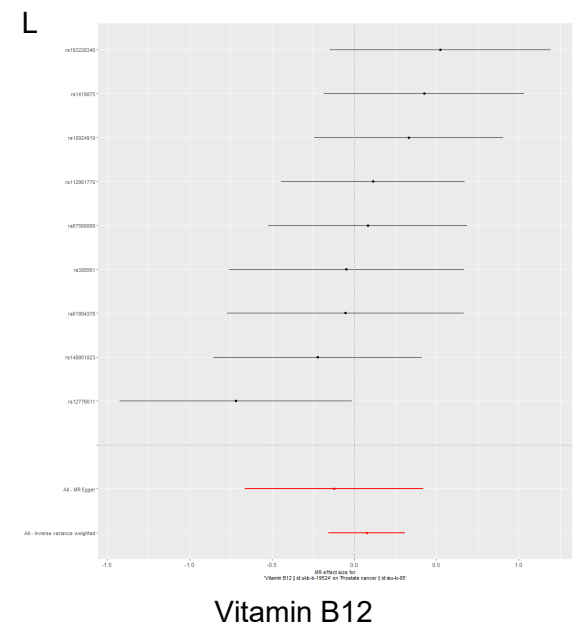

Figure S7 (continue)

M

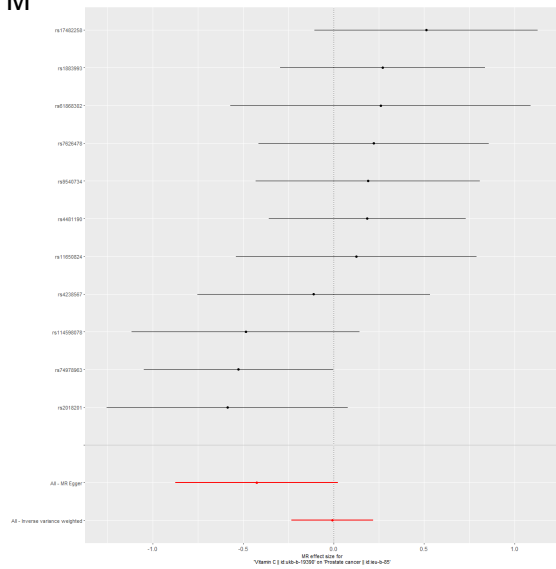

Vitamin C

N

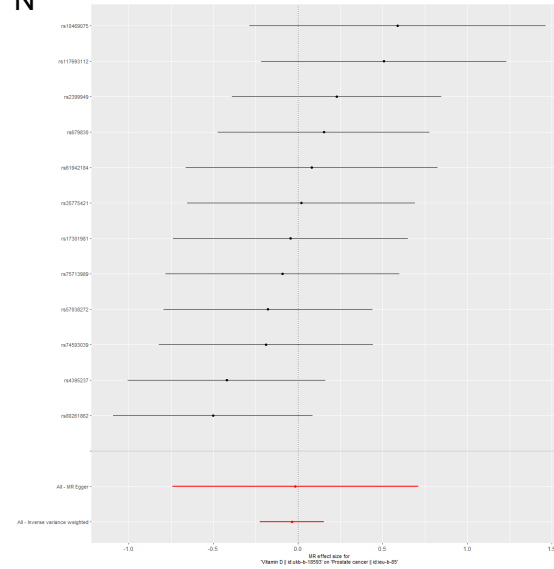

Vitamin D

O

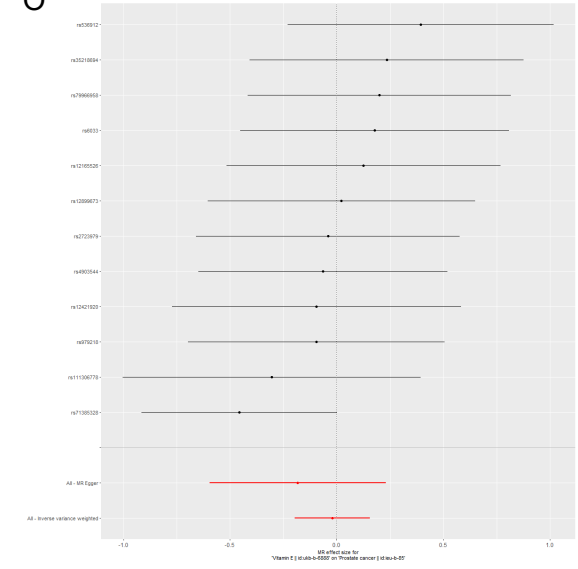

Vitamin E

P

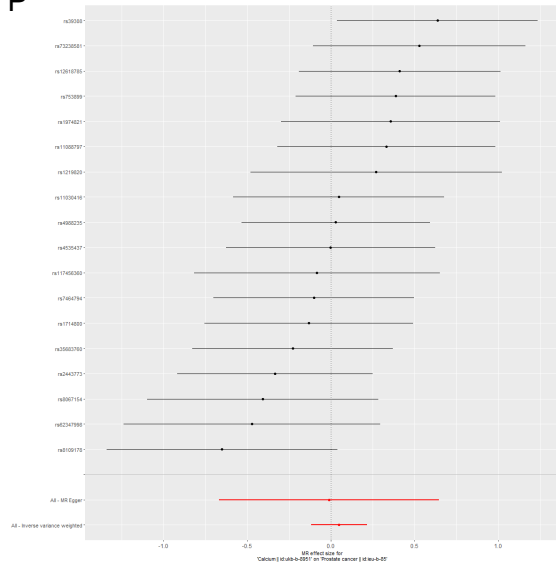

Calcium

Q

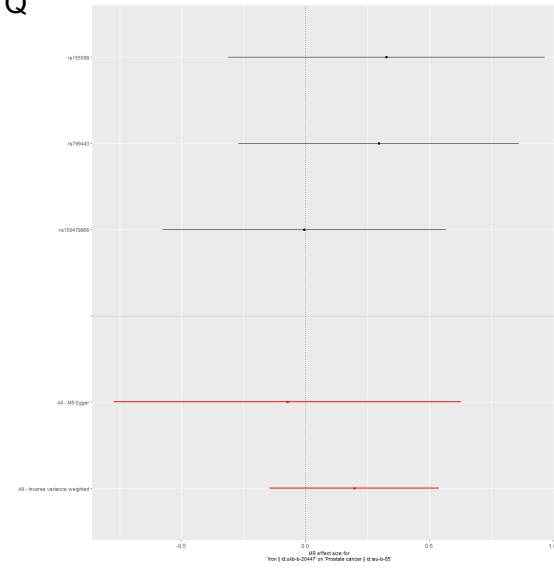

Iron

R

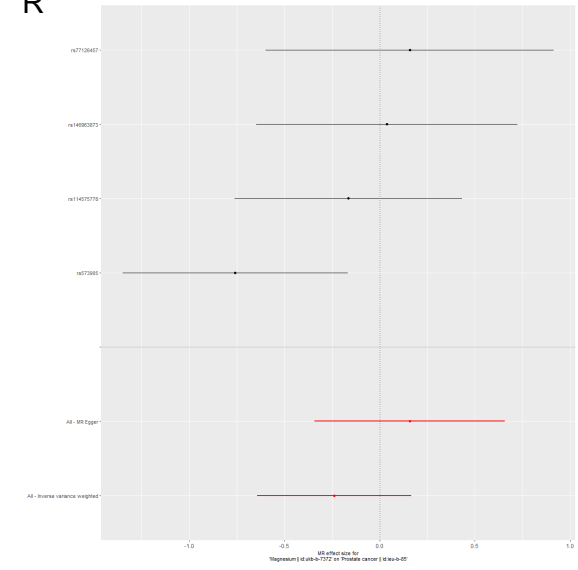

Magnesium

S

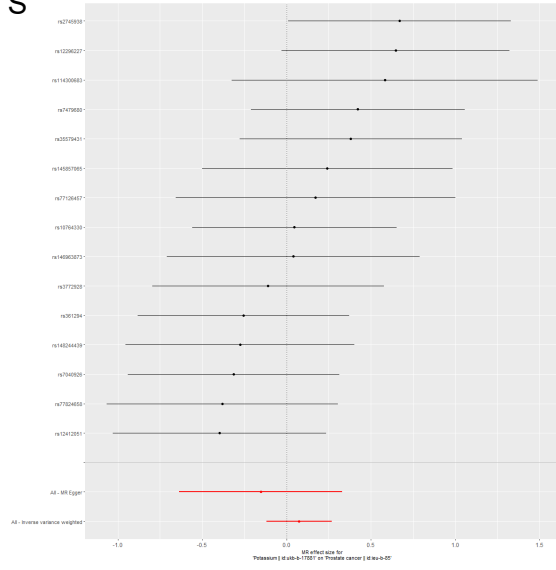

Potassium

Figure S8

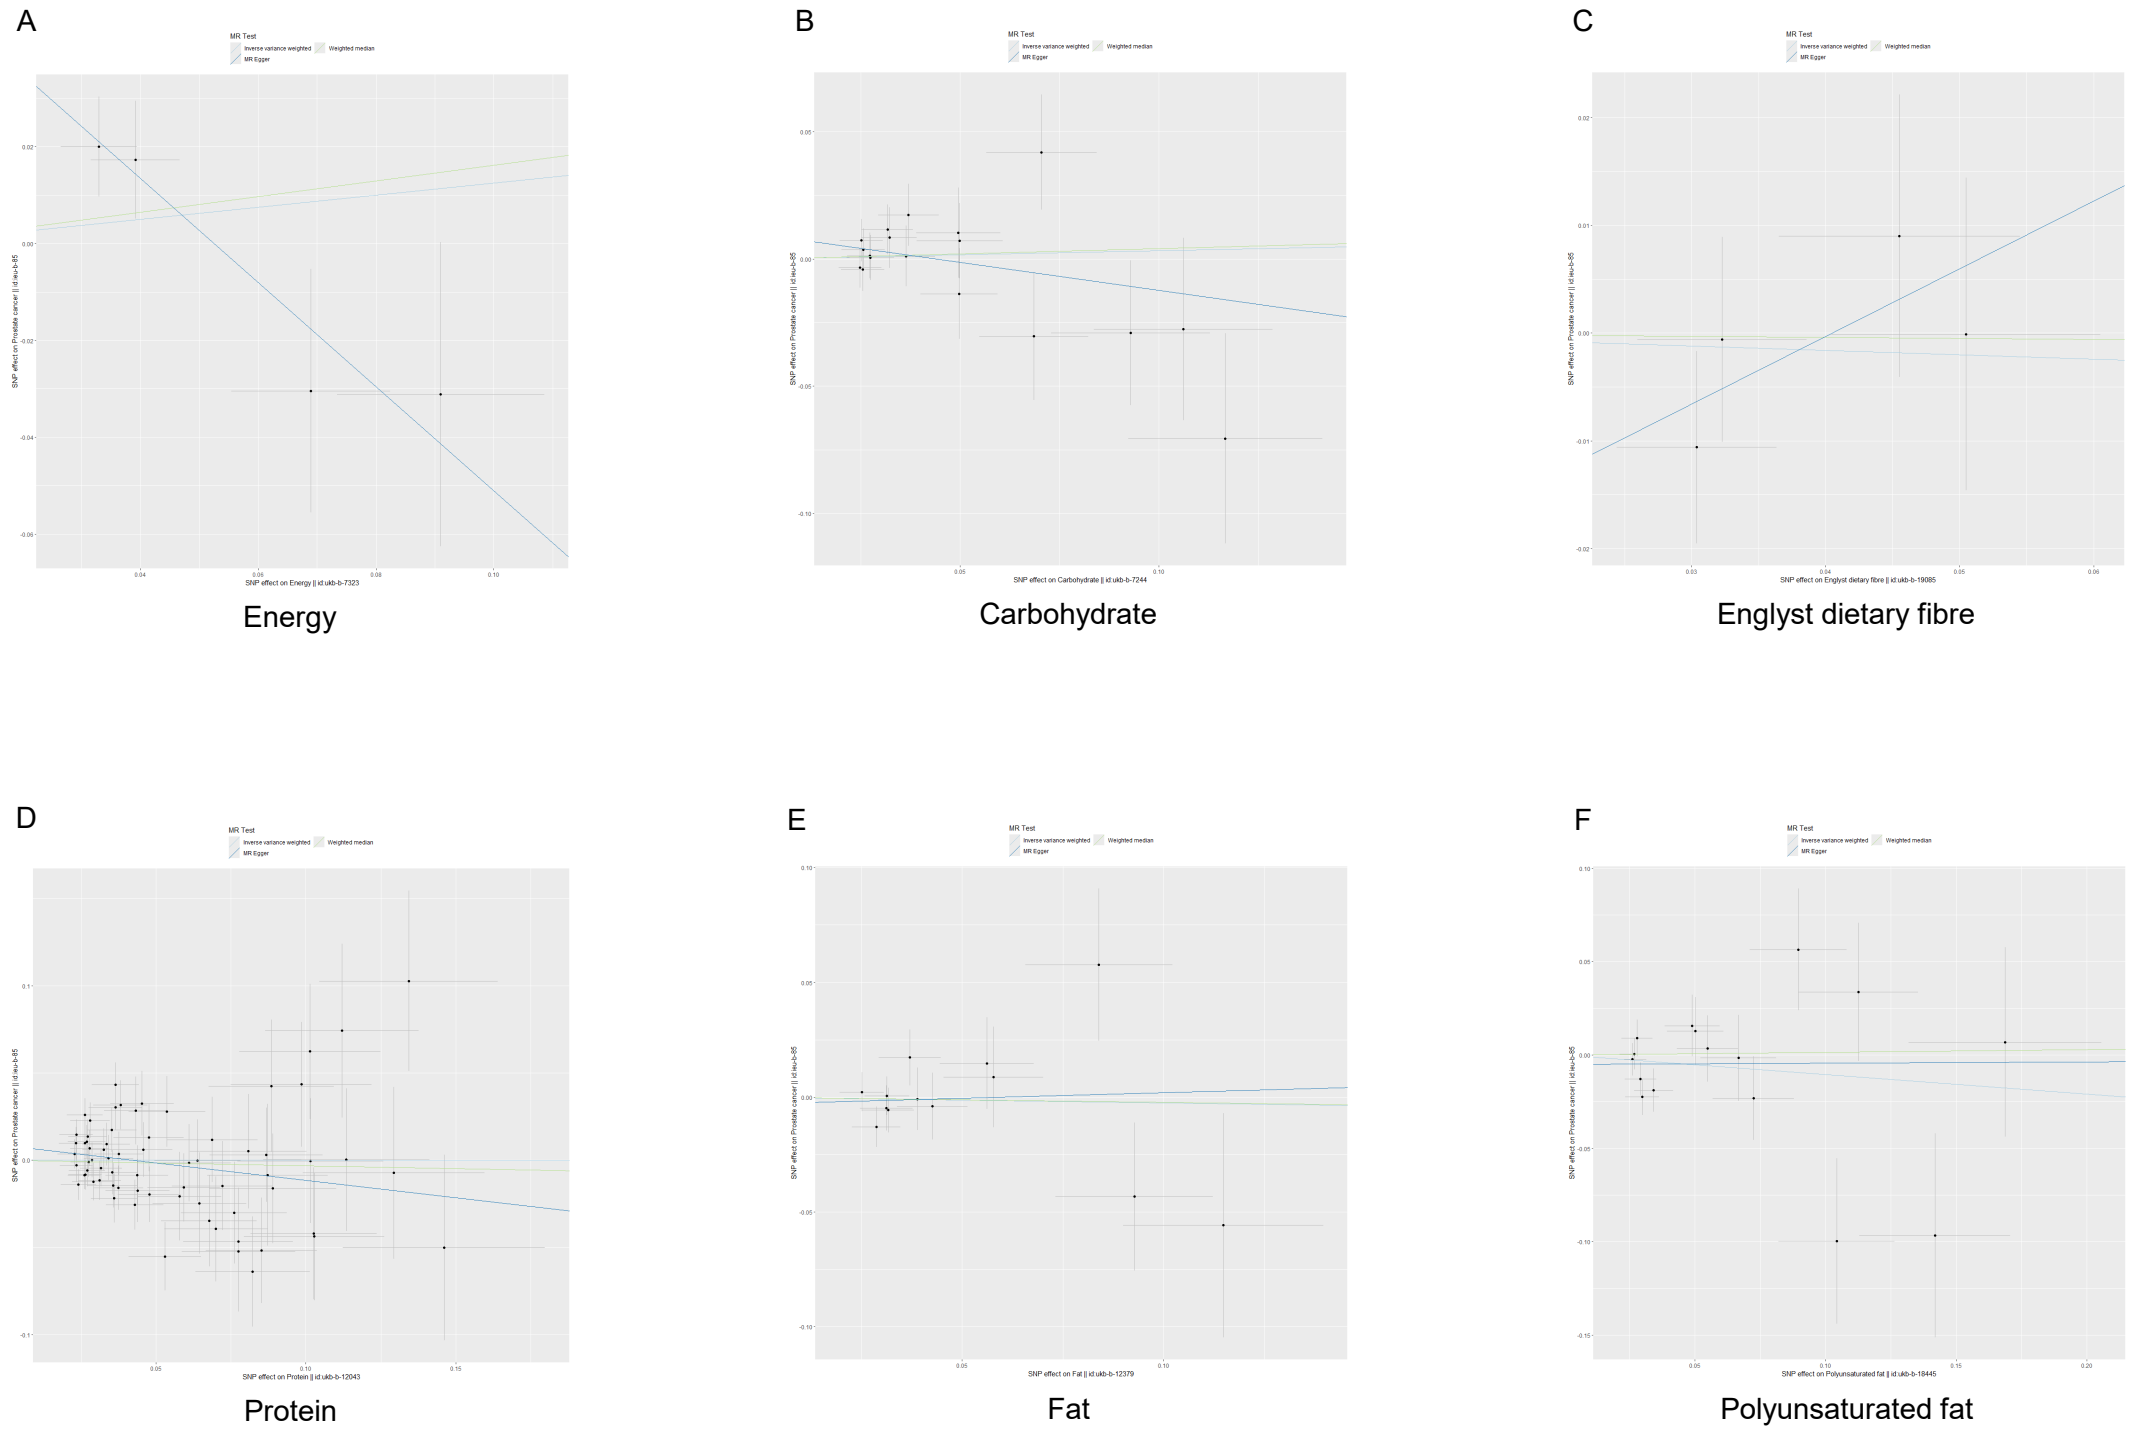

Figure S8 (continue)

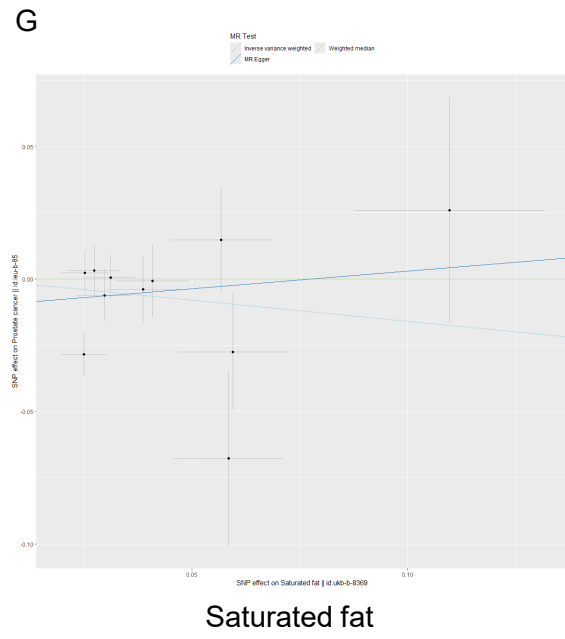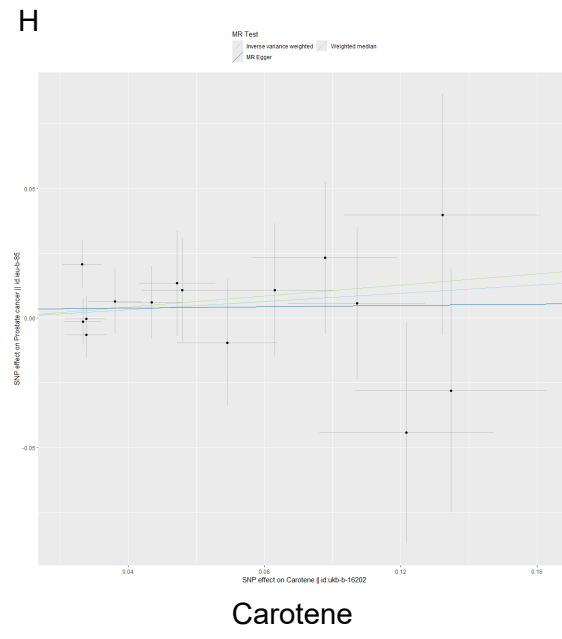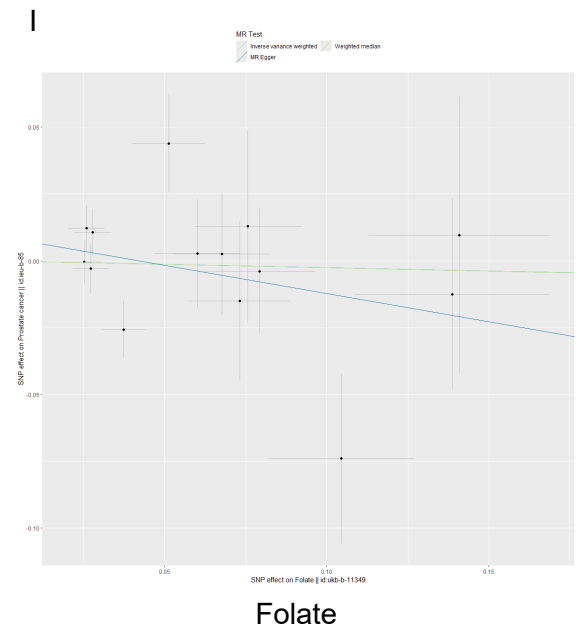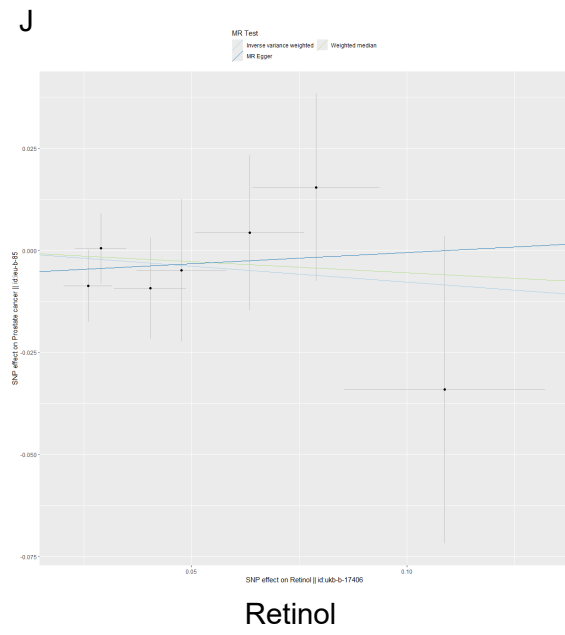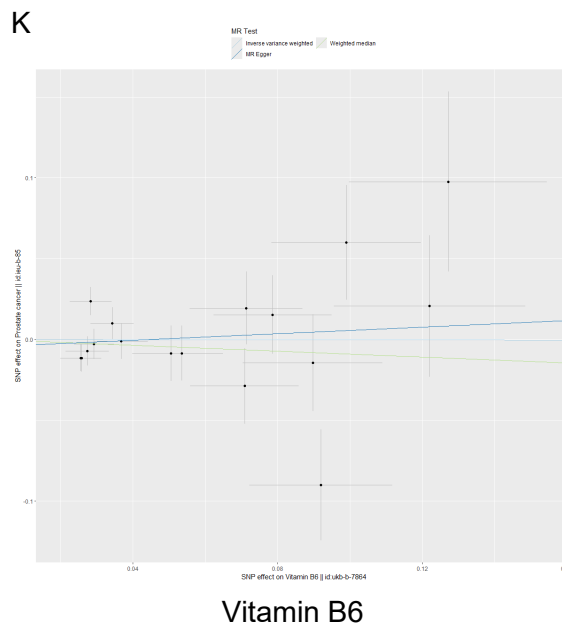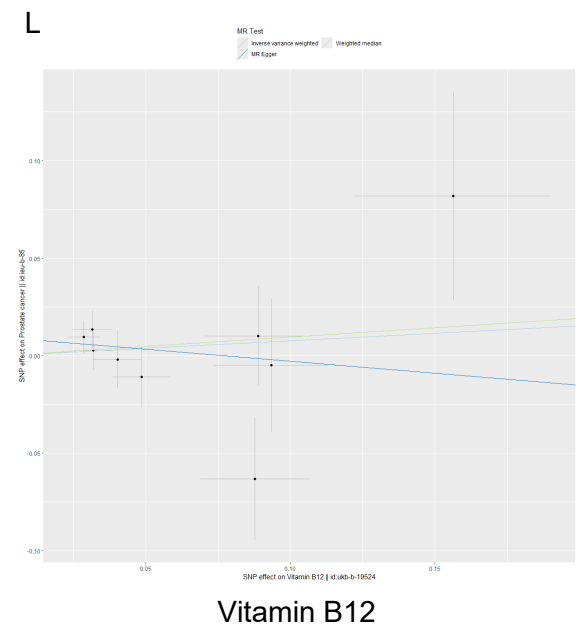

Figure S8 (continue)

M

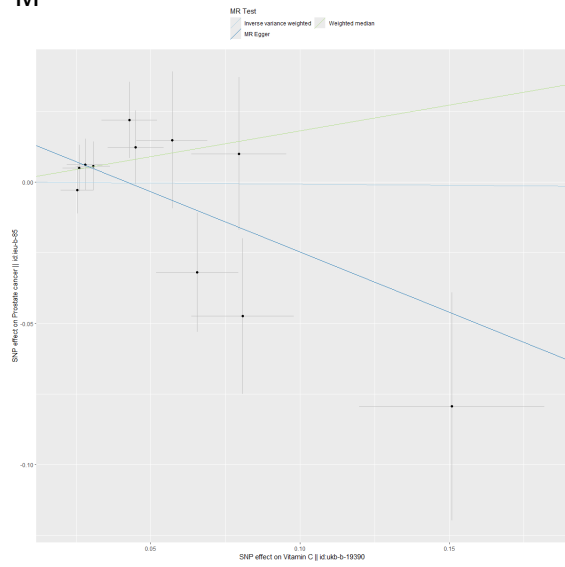

N

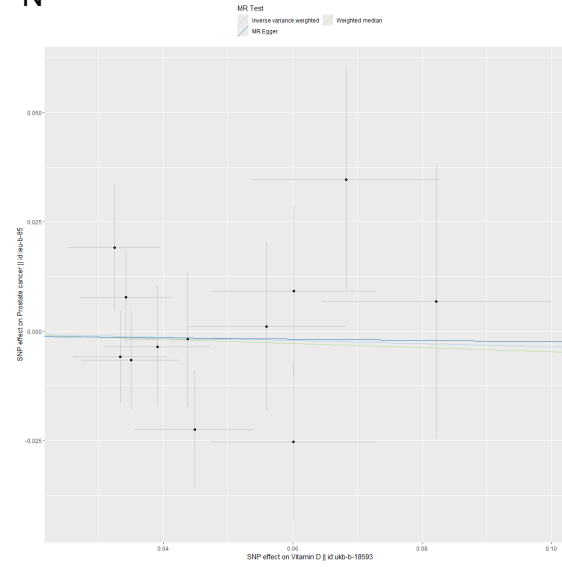

O

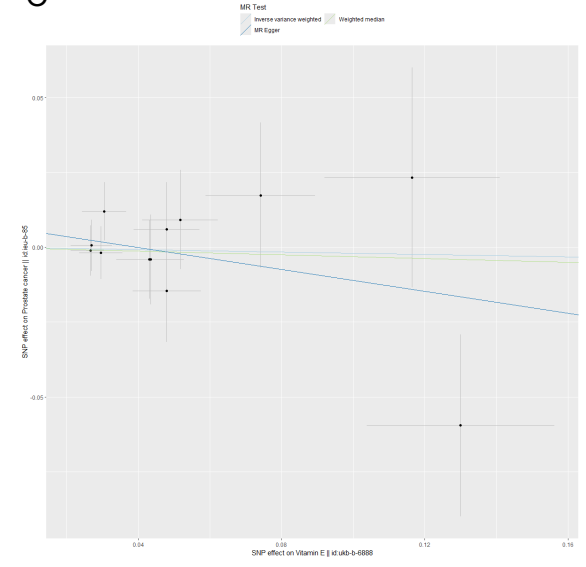

Vitamin C

P

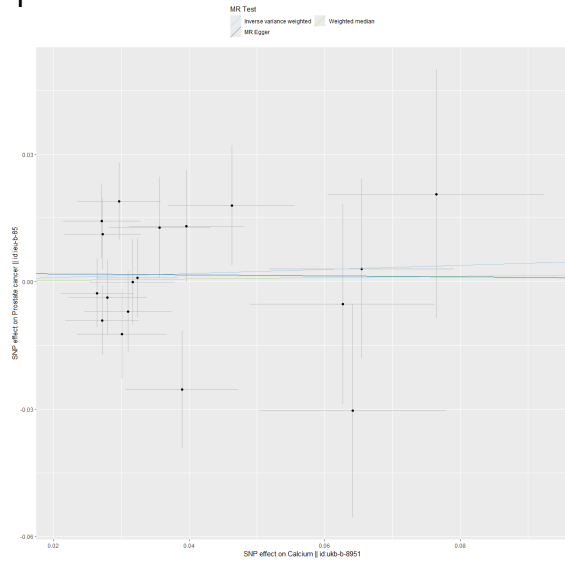

Vitamin D

Q

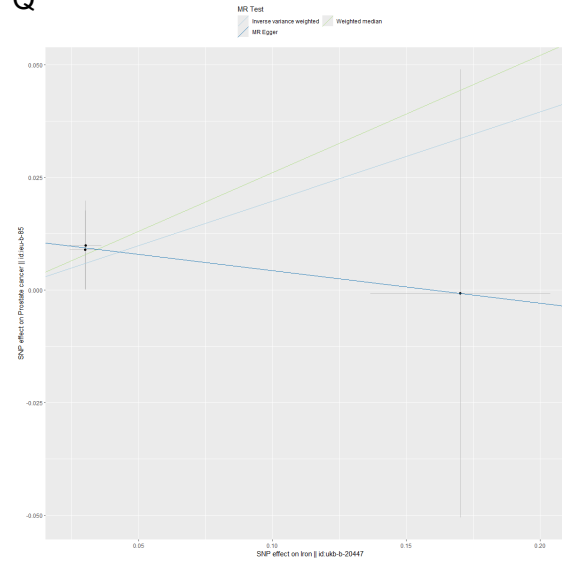

Vitamin E

R

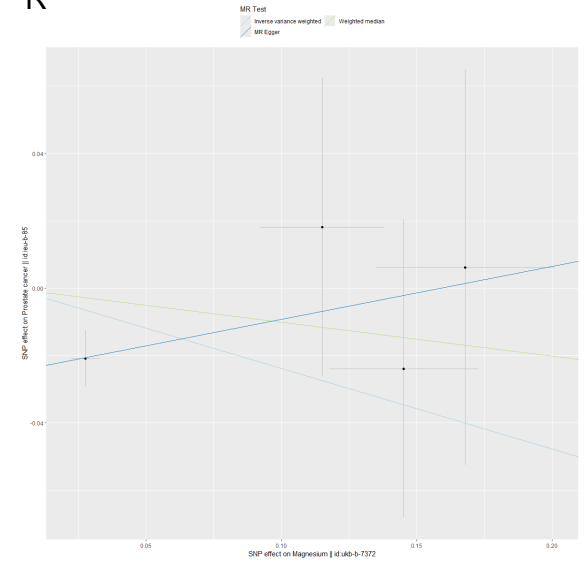

Calcium

S

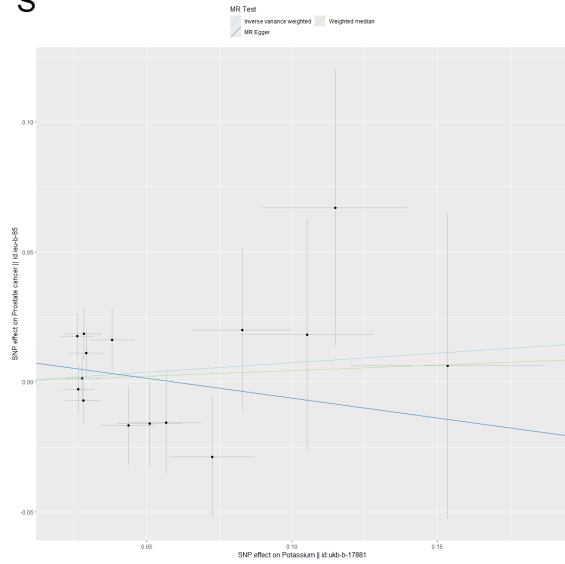

Iron

Magnesium

Potassium



Figure S9

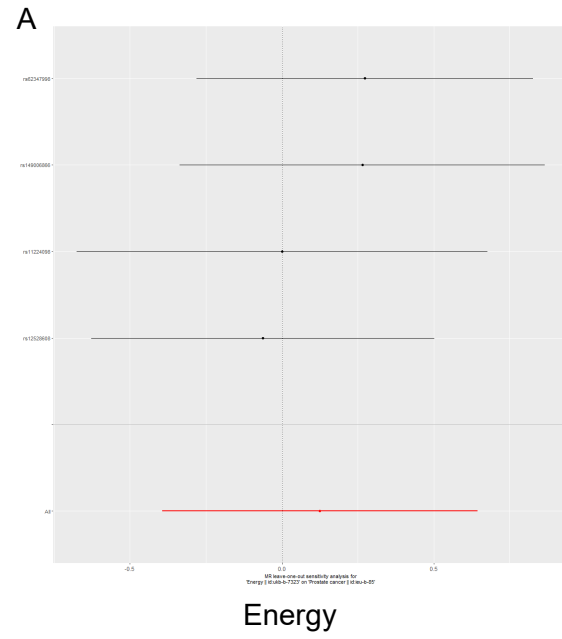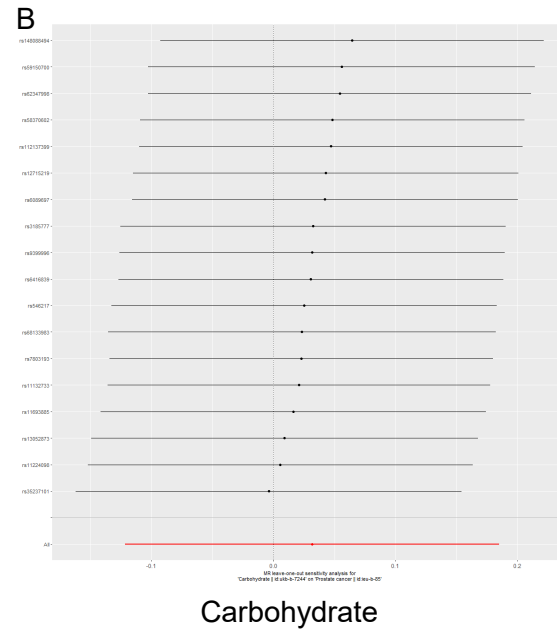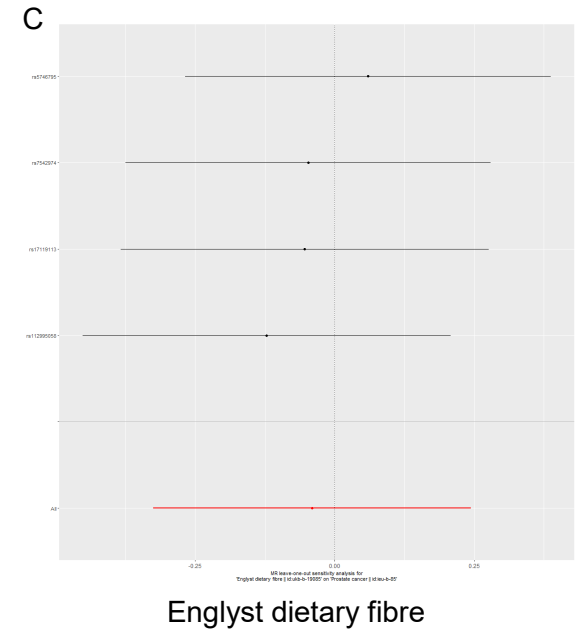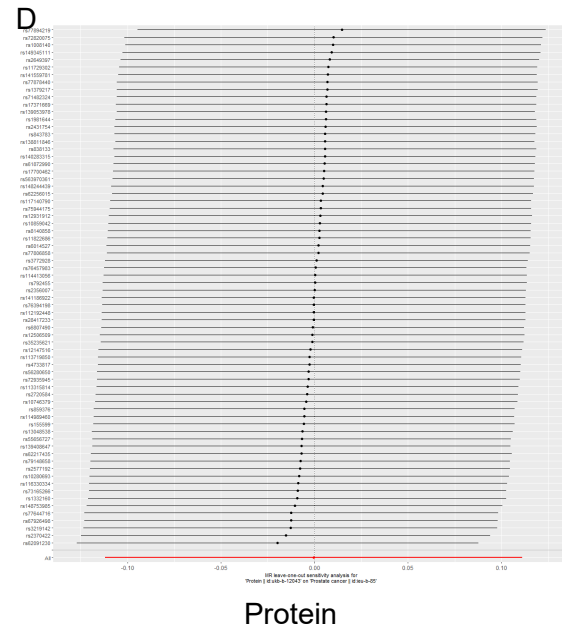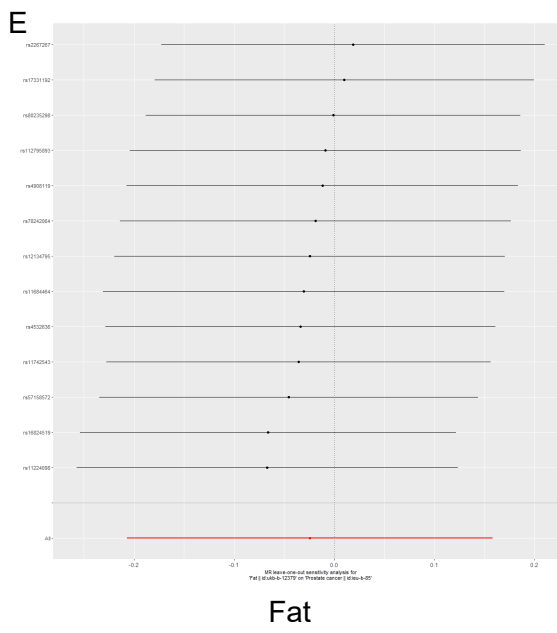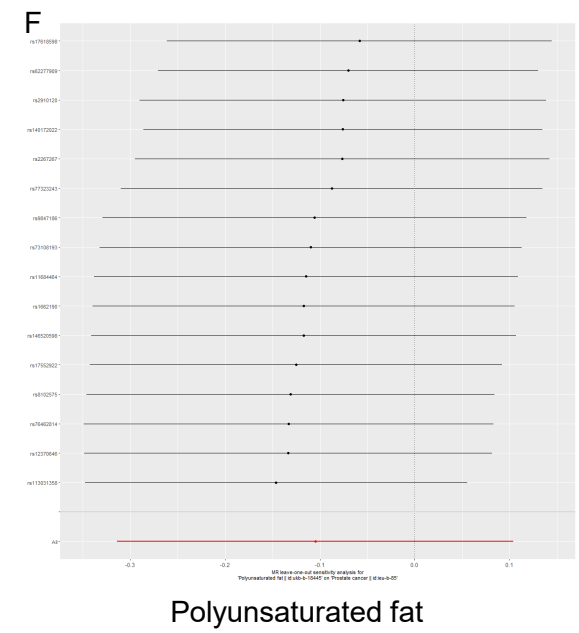

Figure S9 (continue)

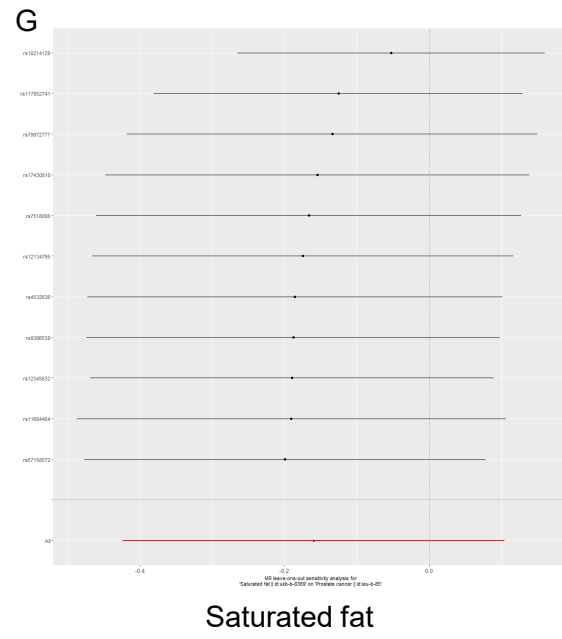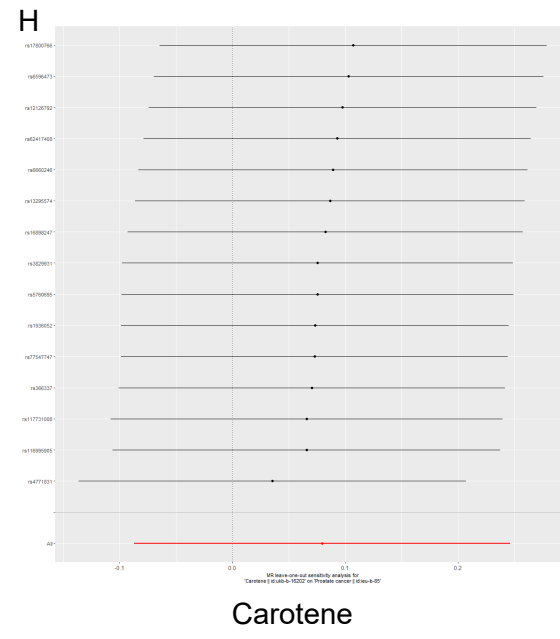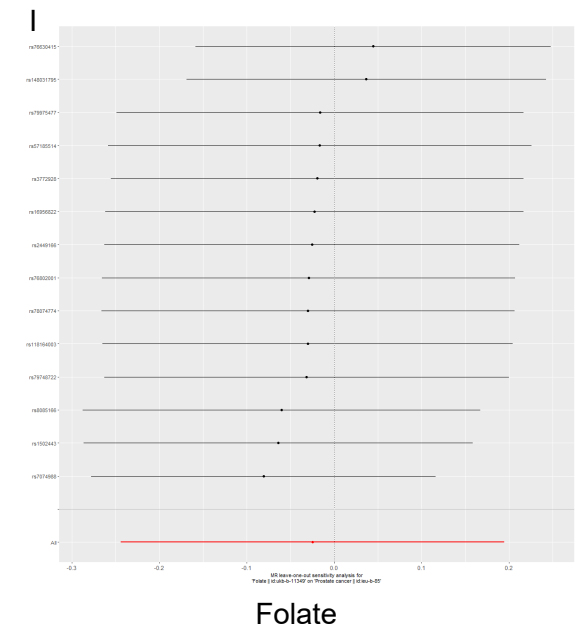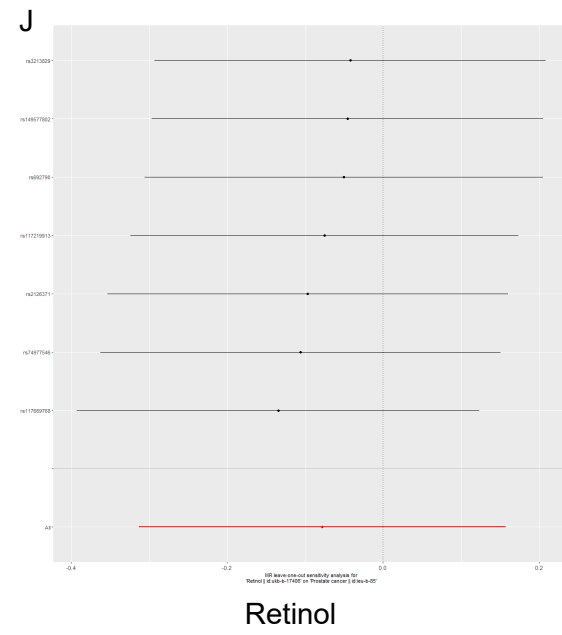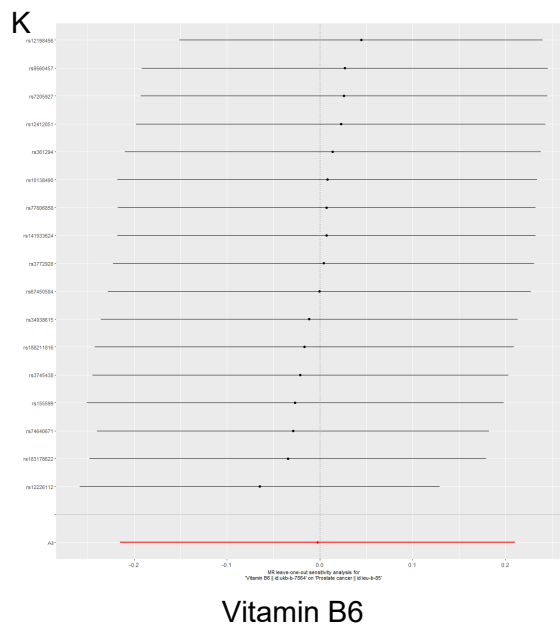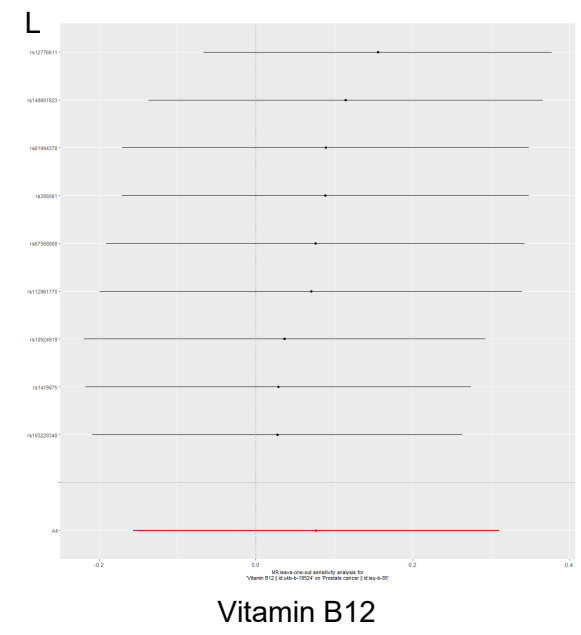

Figure S9 (continue)

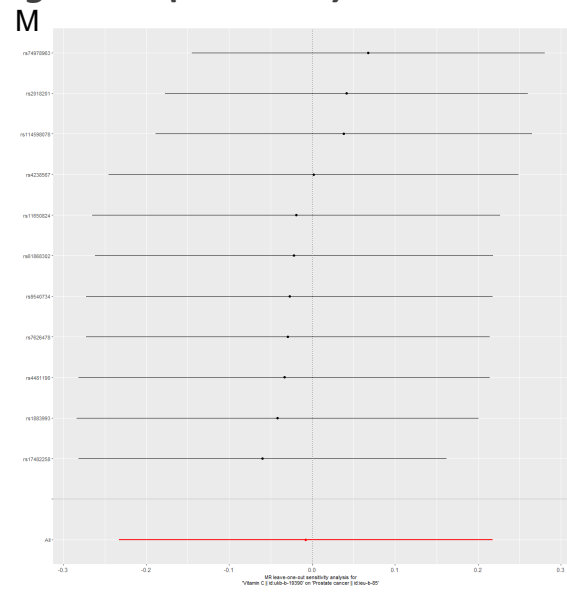

Vitamin C

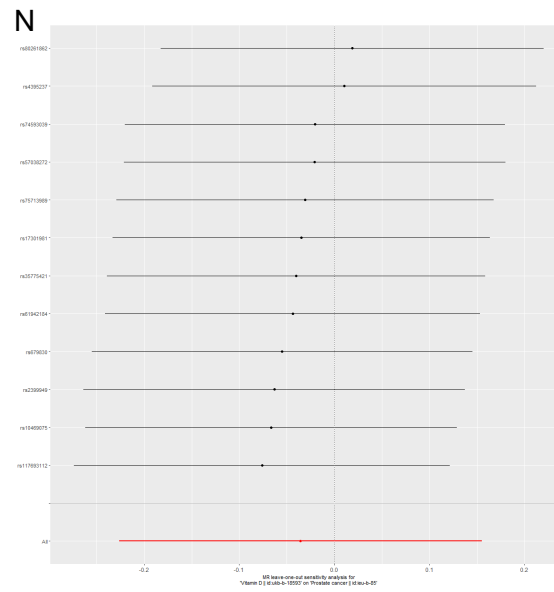

Vitamin D

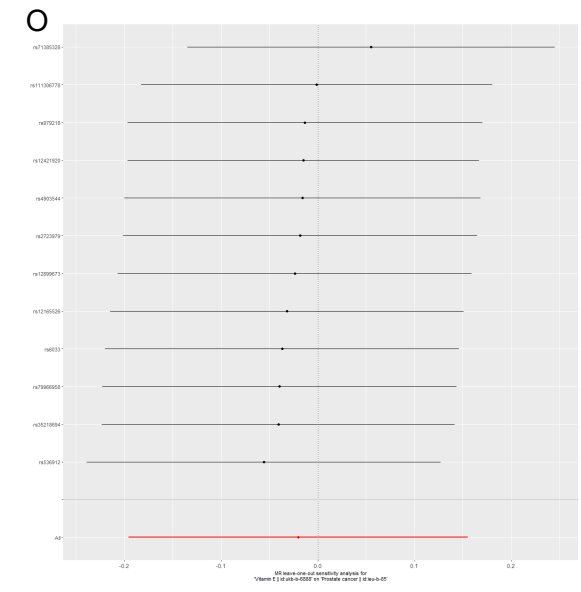

Vitamin E

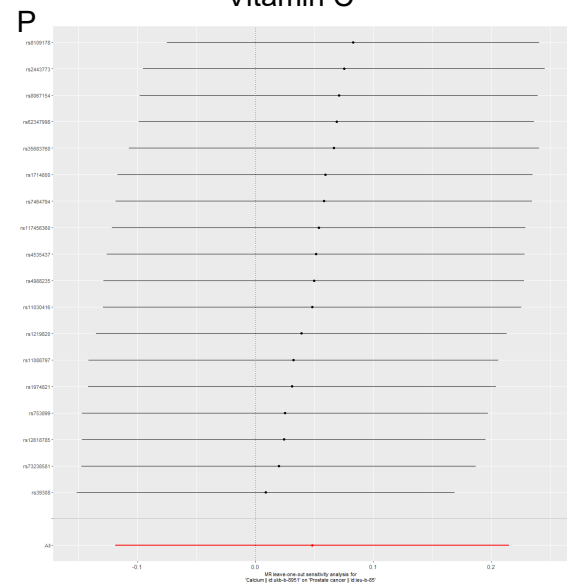

Calcium

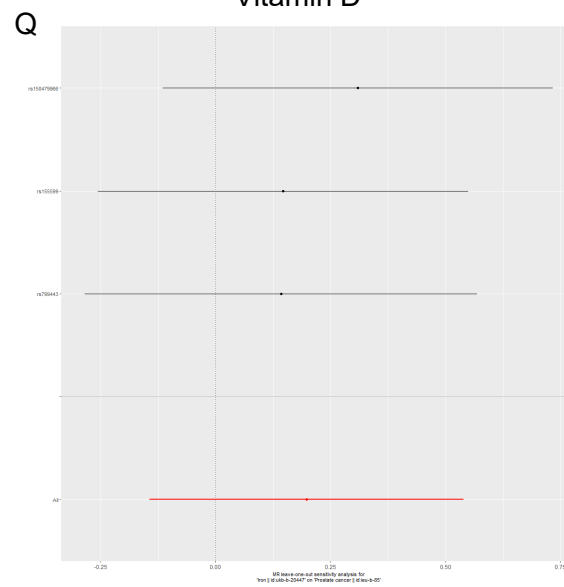

Iron

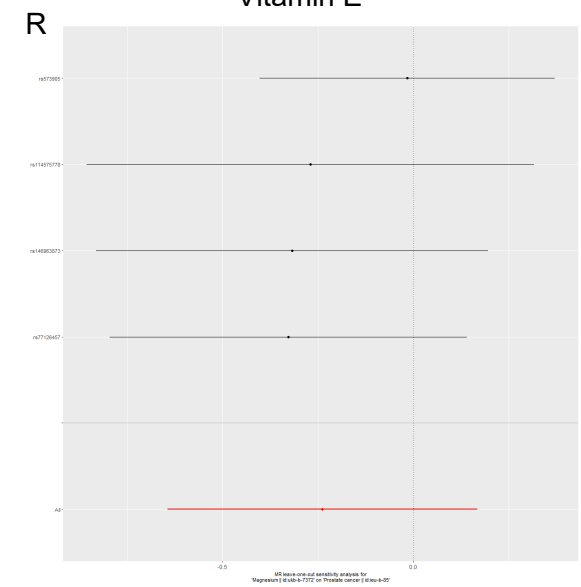

Magnesium

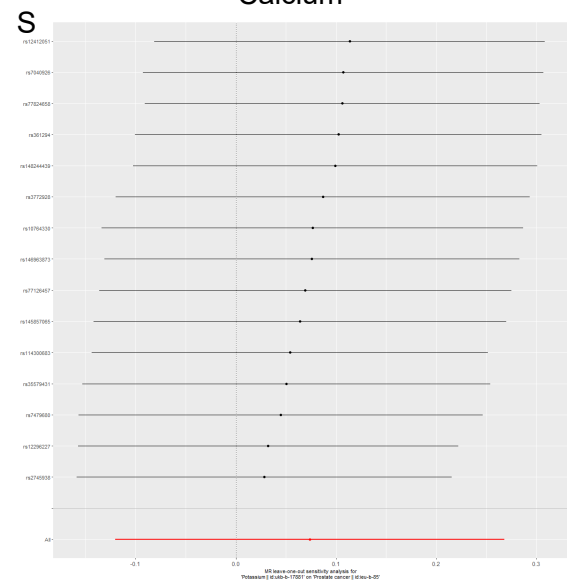

Potassium

Figure S10

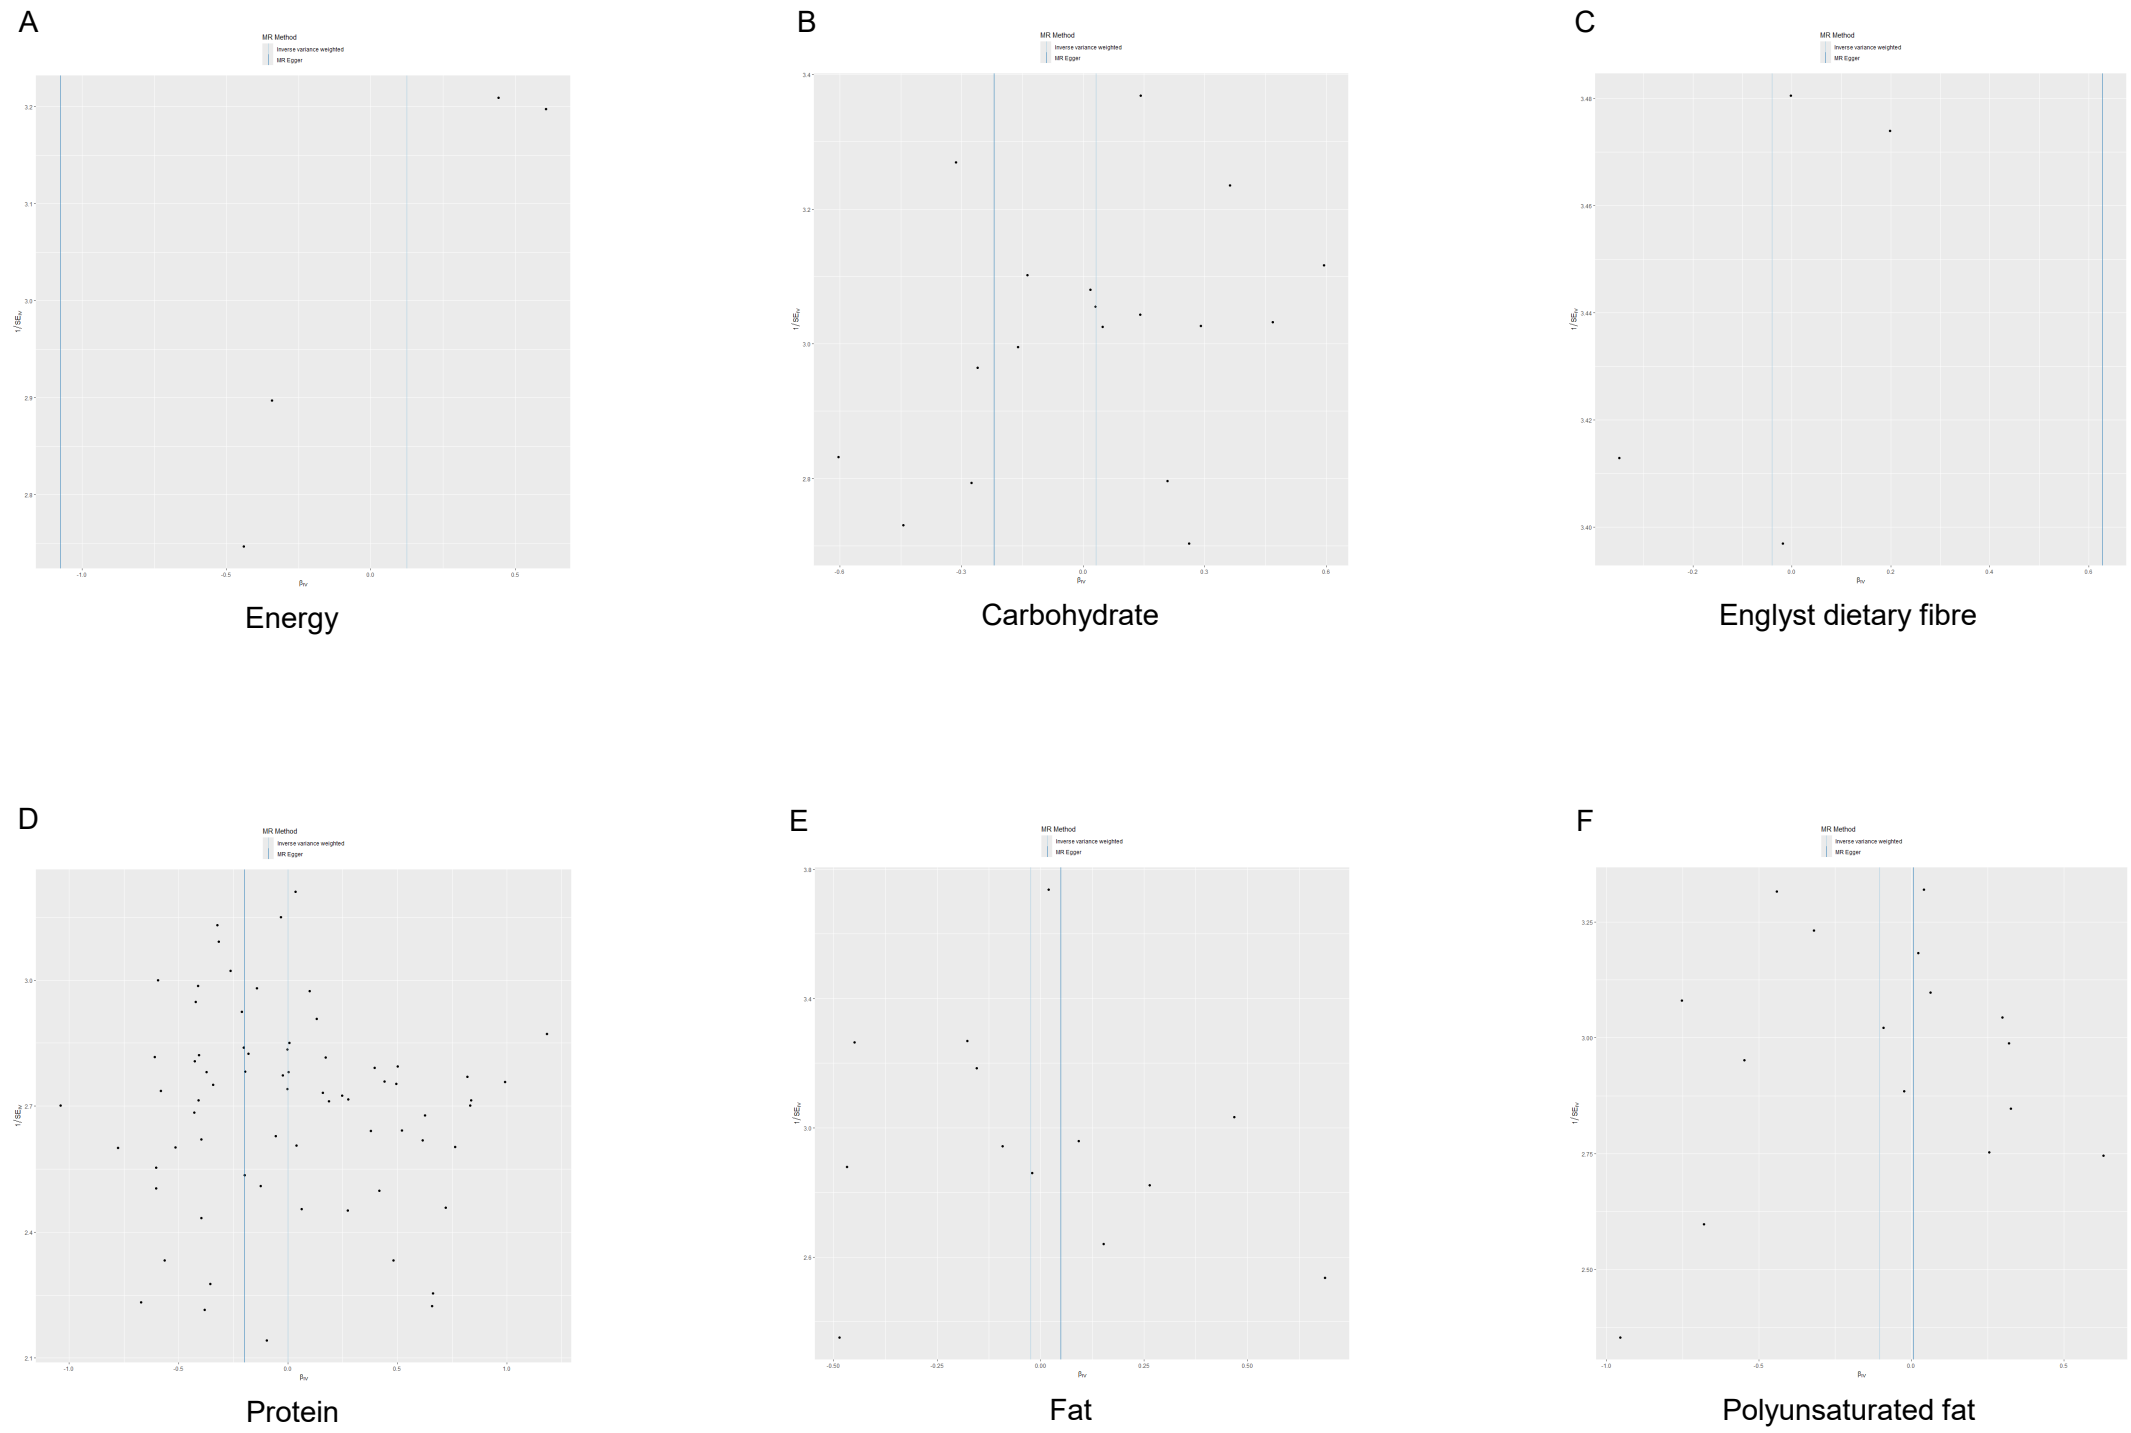

Figure S10 (continue)

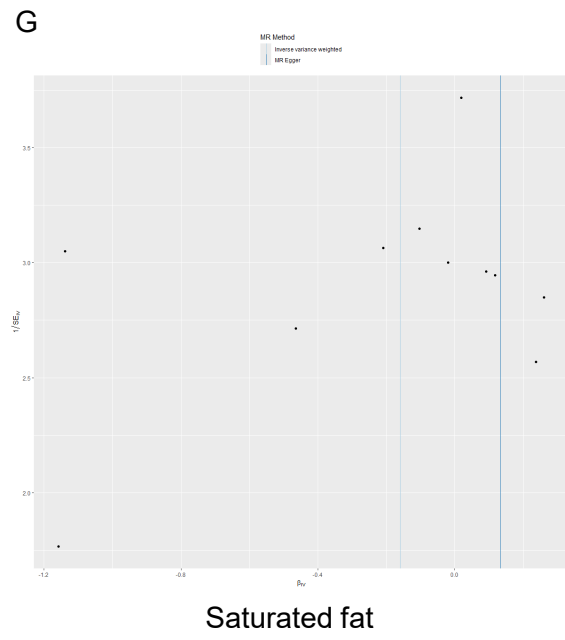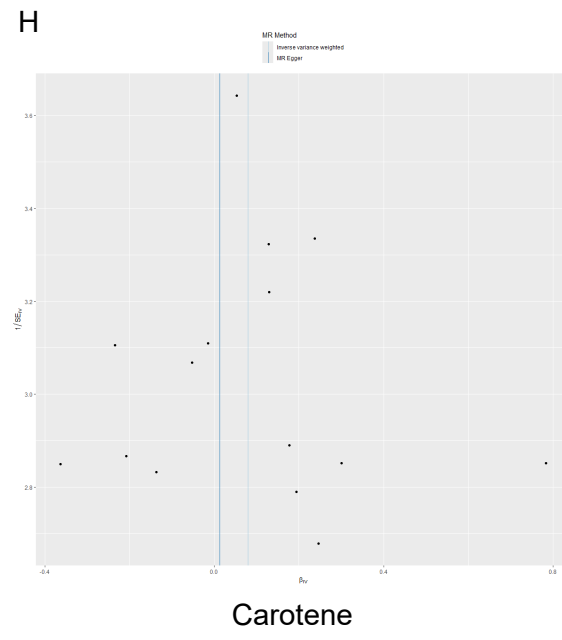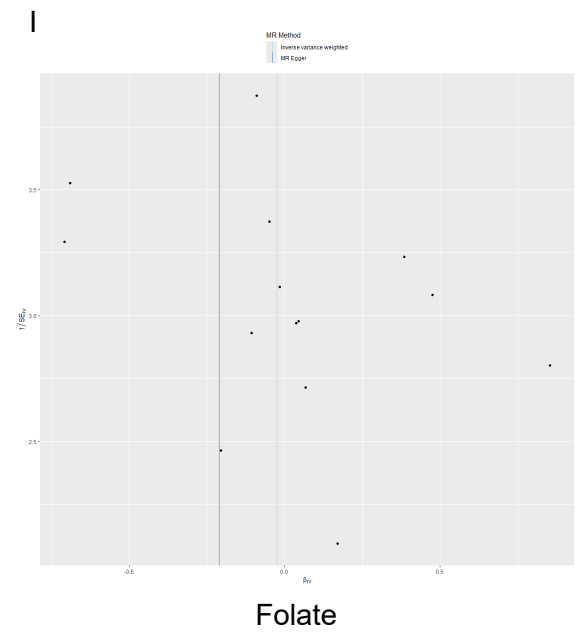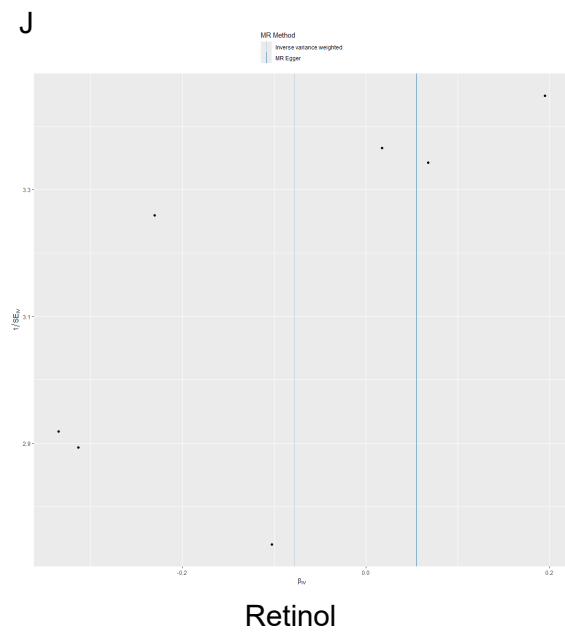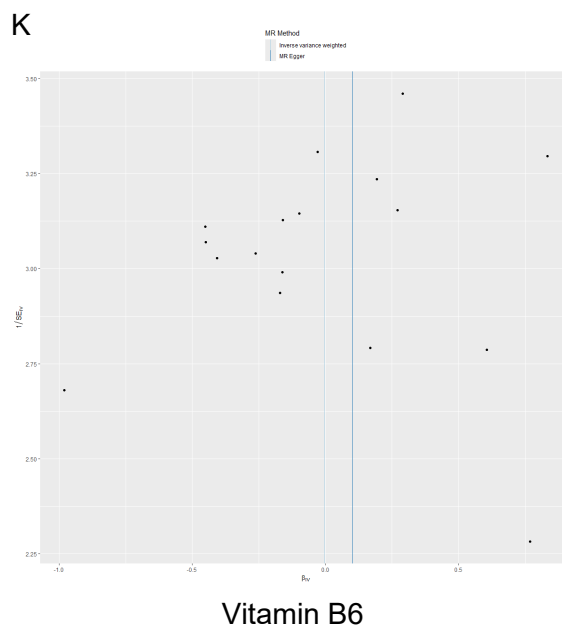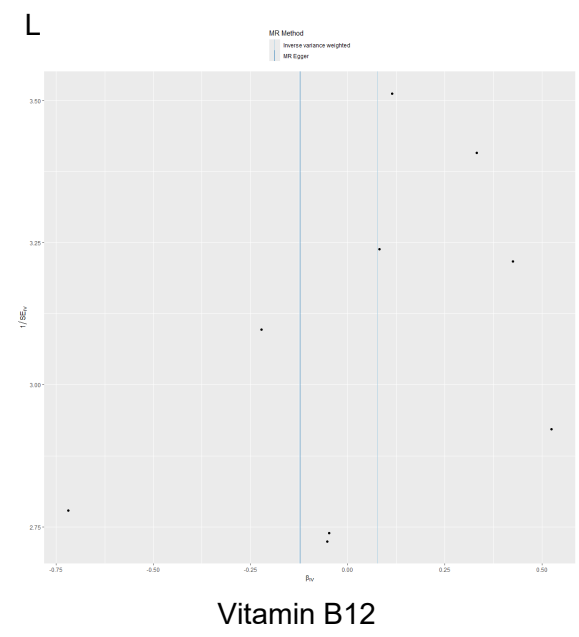

Figure S10 (continue)

M

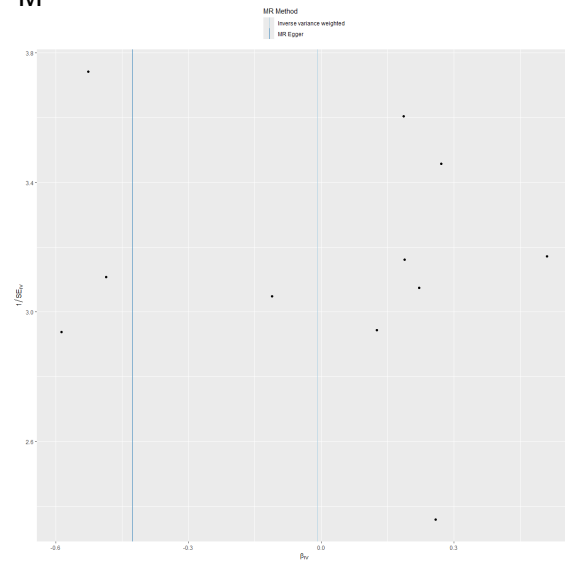

N

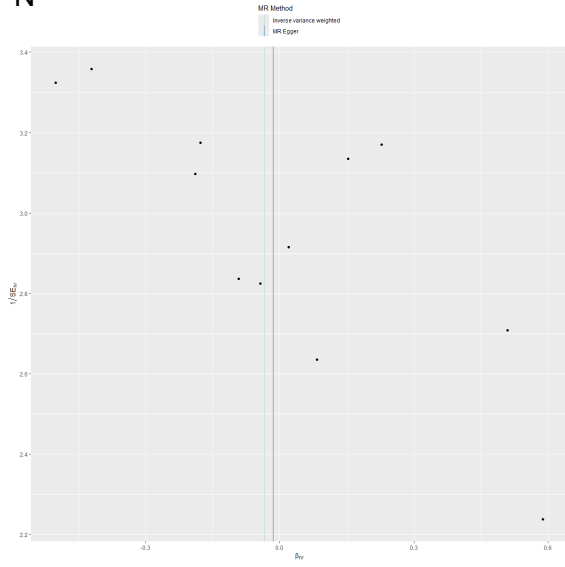

O

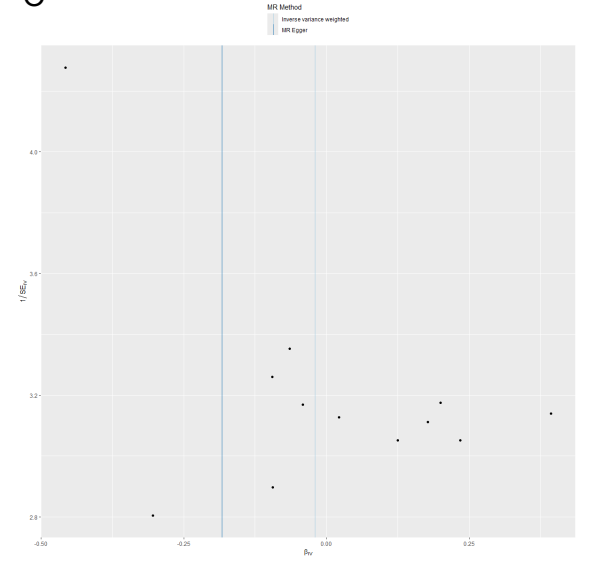

Vitamin C

P

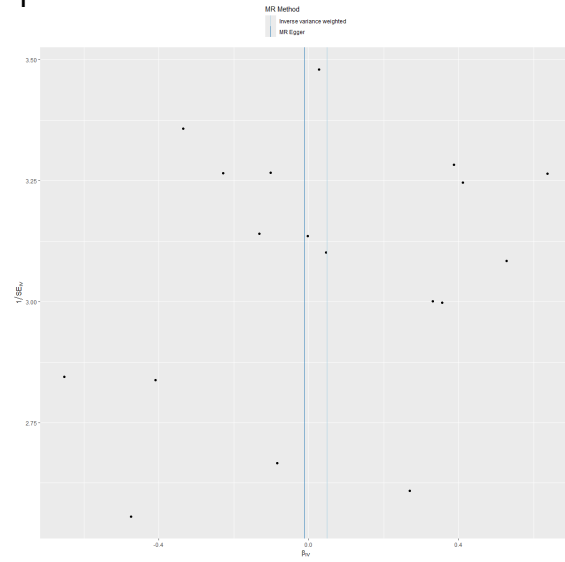

Vitamin D

Q

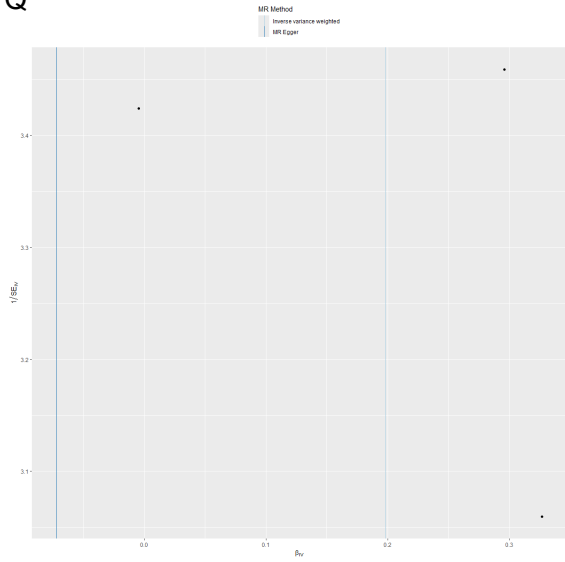

Vitamin E

R

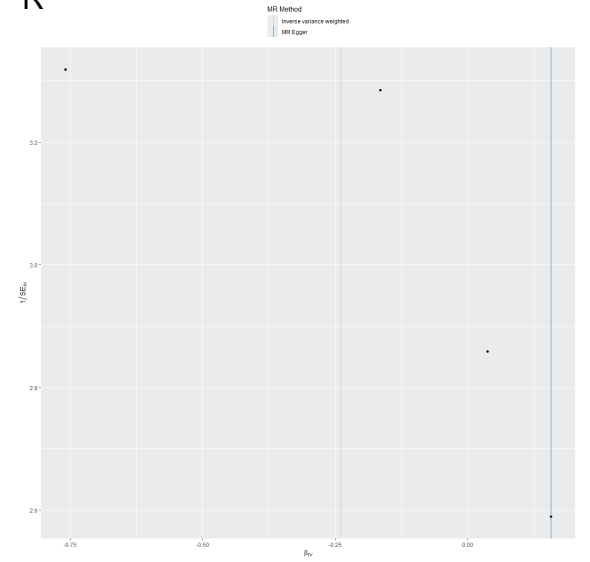

Calcium

S

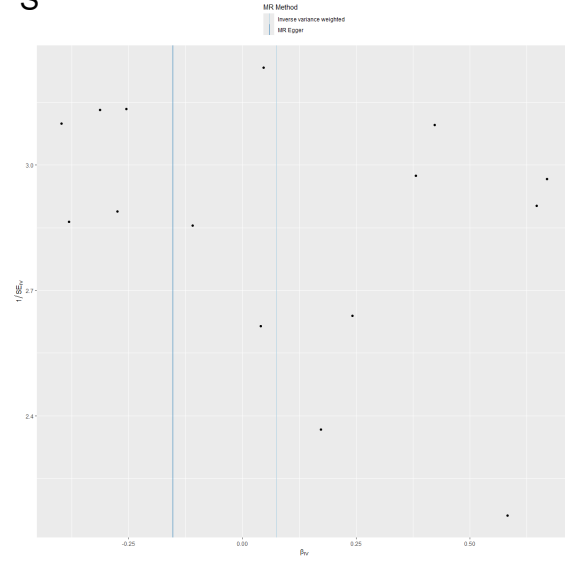

Iron

Magnesium

Potassium
