# Supplementary material for: Relationships of dietary habits with prostate cancer risk: results from Mendelian randomization analyses and the National Health and Nutrition Examination Survey
Source: Royal Society of Chemistry journal article supplement (doi:10.1039/d4fo03859b), 2024-01-01
Supplement: d4fo03859b2.pdf [file d4fo03859b2.pdf]

**Table S1. Detailed information of the questionnaire contents for 18 dietary habits**

| Exposures                  | Touchscreen question                                                                                                                                            | Value type               |
|----------------------------|-----------------------------------------------------------------------------------------------------------------------------------------------------------------|--------------------------|
| Alcohol intake frequency   | About how often do you drink alcohol?                                                                                                                           | Categorical (single)     |
| Beef intake                | How often do you eat beef? (Do not count processed meats)                                                                                                       | Categorical (single)     |
| Bread intake               | How many slices of bread do you eat each WEEK?                                                                                                                  | Integer, slices/week     |
| Cereal intake              | How many bowls of cereal do you eat a WEEK?                                                                                                                     | Integer, bowls/week      |
| Cheese intake              | How often do you eat cheese? (Include cheese in pizzas, quiches, cheese sauce etc)                                                                              | Categorical (single)     |
| Coffee intake              | How many cups of coffee do you drink each DAY? (Include decaffeinated coffee)                                                                                   | Integer, cups/day        |
| Cooked vegetable intake    | On average how many heaped tablespoons of COOKED vegetables would you eat per DAY?<br>(Do not include potatoes; put '0' if you do not eat any)                  | Integer, tablespoons/day |
| Dried fruit intake         | About how many pieces of DRIED fruit would you eat per DAY? (Count one prune, one dried apricot, 10 raisins as one piece; put '0' if you do not eat any)        | Integer, pieces/day      |
| Fresh fruit intake         | About how many pieces of FRESH fruit would you eat per DAY? (Count one apple, one banana, 10 grapes etc as one piece; put '0' if you do not eat any)            | Integer, pieces/day      |
| Lamb/mutton intake         | How often do you eat lamb/mutton? (Do not count processed meats)                                                                                                | Categorical (single)     |
| Non-oily fish intake       | How often do you eat other types of fish? (e.g. cod, tinned tuna, haddock)                                                                                      | Categorical (single)     |
| Oily fish intake           | How often do you eat oily fish? (e.g. sardines, salmon, mackerel, herring)                                                                                      | Categorical (single)     |
| Pork intake                | How often do you eat pork? (Do not count processed meats such as bacon or ham)                                                                                  | Categorical (single)     |
| Poultry intake             | How often do you eat chicken, turkey or other poultry? (Do not count processed meats)                                                                           | Categorical (single)     |
| Processed meat intake      | How often do you eat processed meats (such as bacon, ham, sausages, meat pies, kebabs, burgers, chicken nuggets)?                                               | Categorical (single)     |
| Salad/raw vegetable intake | On average how many heaped tablespoons of SALAD or RAW vegetables would you eat per DAY? (Include lettuce, tomato in sandwiches; put '0' if you do not eat any) | Integer, tablespoons/day |
| Tea intake                 | How many cups of tea do you drink each DAY? (Include black and green tea)                                                                                       | Integer, cups/day        |
| Water intake               | How many glasses of water do you drink each DAY?                                                                                                                | Integer, glasses/day     |

**Table S2. Baseline characteristics of participants for analyzing dietary habits and the odds of prostate cancer**

|                                                    | Without PCa history                       | With PCa history                          | P value <sup>b</sup> |
|----------------------------------------------------|-------------------------------------------|-------------------------------------------|----------------------|
|                                                    | Non-weighted NO. / % (95%CI) <sup>a</sup> | Non-weighted NO. / % (95%CI) <sup>a</sup> |                      |
| Total number of participants (Non-weighted NO.)    | 1264                                      | 30                                        |                      |
| Age (years)                                        |                                           |                                           | 0.003                |
| <50                                                | 39.413(36.037, 42.893)                    | 2.996(0.284, 25.089)                      |                      |
| 50-60                                              | 38.763(35.087, 42.571)                    | 52.842(19.655, 83.693)                    |                      |
| >60                                                | 21.824(19.384, 24.478)                    | 44.163(16.338, 76.209)                    |                      |
| BMI (kg/m <sup>2</sup> )                           |                                           |                                           | 0.729                |
| < 25                                               | 20.735(16.211, 26.128)                    | 18.767(3.504, 59.514)                     |                      |
| 25-29.99                                           | 41.139(37.186, 45.211)                    | 50.598(18.120, 82.579)                    |                      |
| ≥30                                                | 38.126(33.746, 42.708)                    | 30.635(12.027, 58.794)                    |                      |
| Race                                               |                                           |                                           | 0.027                |
| Mexican American                                   | 7.954(4.174, 14.634)                      | 0.728(0.032, 14.200)                      |                      |
| Other Hispanic                                     | 3.880(2.012, 7.352)                       | 2.703(0.270, 22.171)                      |                      |
| Non-Hispanic White                                 | 73.961(67.100, 79.821)                    | 78.432(57.553, 90.700)                    |                      |
| Non-Hispanic Black                                 | 9.540(7.239, 12.474)                      | 17.110(7.440, 34.646)                     |                      |
| Other Race - Including Multi-Racial                | 4.666(2.964, 7.271)                       | 1.027(0.055, 16.348)                      |                      |
| Education level                                    |                                           |                                           | 0.620                |
| Less than 9th grade                                | 6.486(4.470, 9.322)                       | 2.489(0.136, 32.317)□                     |                      |
| 9-11th grade (Includes 12th grade with no diploma) | 11.464(9.699, 13.501)                     | 8.905(2.705, 25.582)                      |                      |
| High school graduate/GED or equivalent             | 24.679(20.903, 28.888)                    | 15.812(1.772, 66.161)                     |                      |
| Some college or AA degree                          | 27.807(24.864, 30.955)                    | 29.623(9.406, 63.050)                     |                      |
| College graduate or above                          | 29.564(25.601, 33.862)                    | 43.171(16.740, 74.161)                    |                      |
| Marital status                                     |                                           |                                           | 0.764                |
| Married                                            | 70.082(67.036, 72.960)                    | 81.981(44.104, 96.328)                    |                      |
| Widowed                                            | 1.951(1.159, 3.267)                       | 0.000(0.000, 0.000)                       |                      |
| Divorced                                           | 13.118(11.589, 14.815)                    | 10.572(1.488, 48.053)                     |                      |
| Separated                                          | 2.770(1.957, 3.909)                       | 2.034(0.239, 15.275)                      |                      |
| Never married                                      | 7.142(5.465, 9.283)                       | 1.027(0.055, 16.348)                      |                      |
| Living with partner                                | 4.937(3.574, 6.783)                       | 4.387(0.586, 26.313)                      |                      |
| Smoked at least 100 cigarettes in life             |                                           |                                           | 0.048                |
| NO                                                 | 48.087(42.669, 53.550)                    | 61.724(41.499, 78.568)                    |                      |
| YES                                                | 51.913(46.450, 57.331)                    | 38.276(21.432, 58.501)                    |                      |
| Diabetes                                           |                                           |                                           | 0.118                |
| NO                                                 | 85.040(82.016, 87.631)                    | 97.580(83.497, 99.690)                    |                      |
| YES                                                | 11.567(9.037, 14.689)                     | 2.420(0.310, 16.503)                      |                      |
| Borderline                                         | 3.394(2.540, 4.522)                       | 0.000(0.000, 0.000)                       |                      |
| Hypertension                                       |                                           |                                           | 0.362                |
| NO                                                 | 63.584(59.371, 67.598)                    | 52.238(21.879, 81.029)                    |                      |
| YES                                                | 36.416(32.402, 40.629)                    | 47.762(18.971, 78.121)                    |                      |
| Asthma                                             |                                           |                                           | 0.439                |
| NO                                                 | 90.293(87.484, 92.526)                    | 84.091(40.814, 97.591)                    |                      |
| YES                                                | 9.707(7.474, 12.516)                      | 15.909(2.409, 59.186)                     |                      |
| Congestive heart failure                           |                                           |                                           | 0.551                |
| NO                                                 | 97.674(96.631, 98.399)                    | 98.679(80.017, 99.928)                    |                      |
| YES                                                | 2.326(1.601, 3.369)                       | 1.321(0.072, 19.983)                      |                      |
| Coronary heart disease                             |                                           |                                           | 0.708                |
| NO                                                 | 95.077(93.031, 96.545)                    | 93.187(50.843, 99.450)                    |                      |
| YES                                                | 4.923(3.455, 6.969)                       | 6.813(0.550, 49.157)                      |                      |
| Angina                                             |                                           |                                           | 0.265                |
| NO                                                 | 97.320(95.996, 98.214)                    | 93.167(50.712, 99.450)                    |                      |
| YES                                                | 2.680(1.786, 4.004)                       | 6.833(0.550, 49.288)                      |                      |
| Stroke                                             |                                           |                                           | 0.802                |
| NO                                                 | 97.304(96.157, 98.116)                    | 97.947(71.058, 99.892)                    |                      |
| YES                                                | 2.696(1.884, 3.843)                       | 2.053(0.108, 28.942)                      |                      |

PCa, prostate cancer; CI, confidence interval; BMI, body mass index.

<sup>a</sup> % (95%CI), survey-weighted percentage (95%CI)

<sup>b</sup> P-value was by survey-weighted Chi-square test

**Table S3. Baseline characteristics of participants for analyzing daily nutrient intake and the odds of prostate cancer**

|                                                     | Without PCa history                       | With PCa history                          | P value <sup>b</sup> |
|-----------------------------------------------------|-------------------------------------------|-------------------------------------------|----------------------|
|                                                     | Non-weighted NO. / % (95%CI) <sup>a</sup> | Non-weighted NO. / % (95%CI) <sup>a</sup> |                      |
| Total number of study population (Non-weighted NO.) | 1689                                      | 89                                        |                      |
| Age (years)                                         |                                           |                                           | <0.001               |
| <50                                                 | 32.665(29.713, 35.760)                    | 0.733(0.093, 5.513)                       |                      |
| 50-60                                               | 33.698(31.120, 36.378)                    | 20.986(7.550, 46.347)                     |                      |
| >60                                                 | 33.637(31.343, 36.011)                    | 78.281(53.380, 91.900)                    |                      |
| BMI (kg/m <sup>2</sup> )                            |                                           |                                           | 0.210                |
| < 25                                                | 20.297(15.458, 26.182)                    | 19.740(9.603, 36.281)                     |                      |
| 25-29.99                                            | 41.497(36.983, 46.159)                    | 53.281(36.870, 69.012)                    |                      |
| ≥30                                                 | 38.206(33.567, 43.070)                    | 26.979(16.900, 40.163)                    |                      |
| Race                                                |                                           |                                           | 0.032                |
| Mexican American                                    | 7.272(3.849, 13.317)                      | 2.845(1.128, 6.991)                       |                      |
| Other Hispanic                                      | 3.469(1.712, 6.900)                       | 1.777(0.244, 11.813)                      |                      |
| Non-Hispanic White                                  | 75.702(69.275, 81.150)                    | 81.505(71.400, 88.609)                    |                      |
| Non-Hispanic Black                                  | 9.297(7.057, 12.154)                      | 12.573(7.446, 20.451)                     |                      |
| Other Race - Including Multi-Racial                 | 4.260(2.510, 7.142)                       | 1.301(0.800, 2.108)                       |                      |
| Education level                                     |                                           |                                           | 0.014                |
| Less than 9th grade                                 | 6.683(5.082, 8.742)                       | 8.331(4.417, 15.162)                      |                      |
| 9-11th grade (Includes 12th grade with no diploma)  | 11.911(10.054, 14.057)                    | 13.740(8.367, 21.745)                     |                      |
| High school graduate/GED or equivalent              | 24.295(20.758, 28.220)                    | 12.785(7.152, 21.814)                     |                      |
| Some college or AA degree                           | 27.692(24.814, 30.767)                    | 22.217(13.183, 34.950)                    |                      |
| College graduate or above                           | 29.419(25.453, 33.723)                    | 42.927(29.248, 57.779)                    |                      |
| Marital status                                      |                                           |                                           | <0.001               |
| Married                                             | 70.423(67.058, 73.579)                    | 78.989(65.528, 88.144)                    |                      |
| Widowed                                             | 3.457(2.412, 4.930)                       | 9.873(5.309, 17.629)                      |                      |
| Divorced                                            | 12.199(10.332, 14.348)                    | 5.595(1.948, 15.020)                      |                      |
| Separated                                           | 2.479(1.694, 3.614)                       | 1.654(0.845, 3.212)                       |                      |
| Never married                                       | 7.290(5.183, 10.162)                      | 1.573(0.319, 7.397)                       |                      |
| Living with partner                                 | 4.153(3.158, 5.445)                       | 2.316(0.491, 10.225)                      |                      |
| Smoked at least 100 cigarettes in life              |                                           |                                           | 0.353                |
| NO                                                  | 45.120(39.775, 50.580)                    | 50.152(41.101, 59.193)                    |                      |
| YES                                                 | 54.880(49.420, 60.225)                    | 49.848(40.807, 58.899)                    |                      |
| Diabetes                                            |                                           |                                           | 0.187                |
| NO                                                  | 83.459(80.787, 85.824)                    | 89.647(80.763, 94.698)                    |                      |
| YES                                                 | 12.925(10.573, 15.708)                    | 9.133(4.847, 16.551)                      |                      |
| Borderline                                          | 3.617(2.437, 5.335)                       | 1.220(0.135, 10.121)                      |                      |
| Hypertension                                        |                                           |                                           | 0.073                |
| NO                                                  | 59.286(54.878, 63.549)                    | 47.015(31.765, 62.843)                    |                      |
| YES                                                 | 40.714(36.451, 45.122)                    | 52.985(37.157, 68.235)                    |                      |
| Asthma                                              |                                           |                                           | 0.636                |
| NO                                                  | 90.337(87.809, 92.386)                    | 88.112(71.686, 95.594)                    |                      |
| YES                                                 | 9.663(7.614, 12.191)                      | 11.888(4.406, 28.314)                     |                      |
| Congestive heart failure                            |                                           |                                           | 0.084                |
| NO                                                  | 97.016(95.742, 97.917)                    | 93.018(79.559, 97.854)                    |                      |
| YES                                                 | 2.984(2.083, 4.258)                       | 6.982(2.146, 20.441)                      |                      |
| Coronary heart disease                              |                                           |                                           | 0.098                |
| NO                                                  | 93.271(91.742, 94.534)                    | 88.551(77.040, 94.689)                    |                      |
| YES                                                 | 6.729(5.466, 8.258)                       | 11.449(5.311, 22.960)                     |                      |
| Angina                                              |                                           |                                           | 0.041                |
| NO                                                  | 96.559(95.225, 97.530)                    | 91.155(77.641, 96.834)                    |                      |
| YES                                                 | 3.441(2.470, 4.775)                       | 8.845(3.166, 22.359)                      |                      |
| Stroke                                              |                                           |                                           | <0.001               |
| NO                                                  | 96.628(95.861, 97.256)                    | 88.900(77.007, 95.038)                    |                      |
| YES                                                 | 3.372(2.744, 4.139)                       | 11.100(4.962, 22.993)                     |                      |

PCa, prostate cancer; CI, confidence interval; BMI, body mass index.

<sup>a</sup> % (95%CI), survey-weighted percentage (95%CI)

<sup>b</sup> P-value was by survey-weighted Chi-square test

**Table S4. Baseline characteristics of daily nutrient intake in participants with and without prostate cancer history**

|                                      | Without PCa history          | With PCa history             | P value <sup>a</sup> |
|--------------------------------------|------------------------------|------------------------------|----------------------|
| Energy (kcal/day)                    | 2419.295(2348.963, 2489.627) | 2120.265(1932.324, 2308.206) | 0.005                |
| Carbohydrate (gm/day)                | 280.527(272.779, 288.275)    | 245.161(219.901, 270.421)    | 0.011                |
| Dietary fiber (gm/day)               | 19.037(18.072, 20.002)       | 18.196(16.046, 20.347)       | 0.500                |
| Protein (gm/day)                     | 96.322(93.590, 99.053)       | 85.278(77.388, 93.168)       | 0.014                |
| Fat (gm/day)                         | 92.735(88.530, 96.940)       | 80.043(72.710, 87.375)       | 0.013                |
| Saturated fatty acids (gm/day)       | 30.520(28.726, 32.314)       | 26.348(23.810, 28.887)       | 0.011                |
| Monounsaturated fatty acids (gm/day) | 33.843(32.379, 35.307)       | 28.653(25.434, 31.871)       | 0.014                |
| Polyunsaturated fatty acids (gm/day) | 19.977(19.170, 20.783)       | 17.879(16.077, 19.682)       | 0.088                |
| Vitamin E (mg/day)                   | 8.968(8.551, 9.386)          | 8.093(7.176, 9.010)          | 0.150                |
| Retinol (mcg/day)                    | 484.525(461.812, 507.237)    | 481.204(417.936, 544.472)    | 0.916                |
| Vitamin A (mcg/day)                  | 709.484(659.754, 759.214)    | 839.676(671.918, 1007.434)   | 0.139                |
| α-carotene (mcg/day)                 | 467.812(324.097, 611.526)    | 580.933(364.943, 796.922)    | 0.369                |
| β-carotene (mcg/day)                 | 2422.221(2051.851, 2792.591) | 3982.532(2091.602, 5873.463) | 0.124                |
| β-cryptoxanthin (mcg/day)            | 95.485(85.178, 105.791)      | 58.068(33.974, 82.162)       | 0.010                |
| Vitamin B1 (mg/day)                  | 1.884(1.820, 1.949)          | 2.068(1.670, 2.465)          | 0.383                |
| Vitamin B2 (mg/day)                  | 2.517(2.435, 2.599)          | 2.384(2.147, 2.621)          | 0.337                |
| Vitamin B6 (mg/day)                  | 2.383(2.288, 2.479)          | 2.232(1.898, 2.567)          | 0.419                |
| Folate (mcg/day)                     | 463.387(443.488, 483.286)    | 461.975(408.671, 515.280)    | 0.949                |
| Vitamin B12 (mcg/day)                | 6.246(5.922, 6.570)          | 5.737(4.644, 6.830)          | 0.383                |
| Vitamin C (mg/day)                   | 94.071(87.317, 100.824)      | 82.359(55.143, 109.576)      | 0.414                |
| Vitamin D (mcg/day)                  | 6.088(5.641, 6.534)          | 5.727(4.019, 7.434)          | 0.677                |
| Vitamin K (mcg/day)                  | 111.376(97.516, 125.236)     | 132.218(96.221, 168.215)     | 0.325                |
| Calcium (mg/day)                     | 1106.286(1070.642, 1141.929) | 934.482(856.421, 1012.544)   | 0.003                |
| Phosphorus (mg/day)                  | 1620.853(1577.616, 1664.091) | 1386.620(1242.959, 1530.281) | 0.006                |
| Magnesium (mg/day)                   | 350.544(341.125, 359.962)    | 293.173(263.611, 322.735)    | 0.001                |
| Iron (mg/day)                        | 17.147(16.658, 17.636)       | 17.915(16.127, 19.703)       | 0.423                |
| Zinc (mg/day)                        | 14.118(13.565, 14.671)       | 12.265(10.719, 13.811)       | 0.023                |
| Copper (mg/day)                      | 1.499(1.448, 1.549)          | 1.357(1.252, 1.461)          | 0.040                |
| Sodium (mg/day)                      | 4128.051(4009.398, 4246.704) | 3576.371(3113.434, 4039.307) | 0.039                |
| Potassium (mg/day)                   | 3263.805(3158.968, 3368.643) | 2850.937(2497.007, 3204.868) | 0.029                |
| Selenium (mcg/day)                   | 128.957(124.280, 133.633)    | 117.798(107.986, 127.609)    | 0.048                |

Continuous variables were presented as survey-weighted median (Q1, Q3).

PCa, prostate cancer.

<sup>a</sup> P-value was by survey-weighted linear regression

**Table S5. Instrumental variables of 18 dietary habits for prostate cancer risk**

Alcohol intake frequency

| SNP        | Effect allele | Other allele | EAF      | Beta       | SE        | P value   | R <sup>2</sup> | Sample size | F statistics |
|------------|---------------|--------------|----------|------------|-----------|-----------|----------------|-------------|--------------|
| rs10188314 | T             | C            | 0.470852 | -0.0197869 | 0.0030361 | 7.20E-11  | 9.19E-05       | 462346      | 42.475236    |
| rs10792669 | G             | A            | 0.505254 | 0.0174322  | 0.0030407 | 9.90E-09  | 7.11E-05       | 462346      | 32.867726    |
| rs11039429 | T             | C            | 0.454624 | -0.0235595 | 0.0030374 | 8.70E-15  | 0.0001301      | 462346      | 60.163745    |
| rs11223617 | A             | G            | 0.206155 | 0.0250908  | 0.0037538 | 2.30E-11  | 9.66E-05       | 462346      | 44.676852    |
| rs11700855 | G             | A            | 0.093465 | -0.029795  | 0.0052329 | 1.20E-08  | 7.01E-05       | 462346      | 32.418783    |
| rs11750777 | A             | G            | 0.209454 | -0.020493  | 0.0037261 | 3.80E-08  | 6.54E-05       | 462346      | 30.247758    |
| rs11787216 | T             | C            | 0.369127 | 0.0244162  | 0.0032008 | 2.40E-14  | 0.0001258      | 462346      | 58.189231    |
| rs11940694 | G             | A            | 0.604193 | -0.0437138 | 0.0031161 | 1.00E-44  | 0.0004255      | 462346      | 196.79554    |
| rs12153855 | C             | T            | 0.10497  | 0.0294435  | 0.0049348 | 2.40E-09  | 7.70E-05       | 462346      | 35.598429    |
| rs1228589  | A             | G            | 0.246133 | 0.0210699  | 0.0035281 | 2.30E-09  | 7.71E-05       | 462346      | 35.665732    |
| rs1229984  | C             | T            | 0.97277  | -0.261708  | 0.009185  | 1.40E-178 | 0.0017529      | 462346      | 811.85334    |
| rs12312693 | C             | T            | 0.451772 | -0.0176811 | 0.0030503 | 6.80E-09  | 7.27E-05       | 462346      | 33.600285    |
| rs13102973 | C             | T            | 0.61881  | -0.0194072 | 0.0031188 | 4.90E-10  | 8.37E-05       | 462346      | 32.024411    |
| rs13135092 | G             | A            | 0.083483 | 0.0438341  | 0.0054988 | 1.60E-15  | 0.0001374      | 462346      | 63.544818    |
| rs13178443 | T             | C            | 0.276349 | -0.0186516 | 0.0033898 | 3.80E-08  | 6.55E-05       | 462346      | 30.274325    |
| rs13390019 | C             | T            | 0.134041 | 0.0296116  | 0.0044918 | 4.30E-11  | 9.40E-05       | 462346      | 43.458745    |
| rs1421085  | C             | T            | 0.403447 | 0.0199392  | 0.0030848 | 1.00E-10  | 9.04E-05       | 462346      | 41.778875    |
| rs1515591  | G             | T            | 0.383186 | 0.0182303  | 0.0031164 | 4.90E-09  | 7.40E-05       | 462346      | 34.221047    |
| rs1666658  | C             | T            | 0.392206 | 0.0179674  | 0.0030987 | 6.70E-09  | 7.27E-05       | 462346      | 33.621783    |
| rs17662759 | C             | T            | 0.089115 | 0.0301348  | 0.0054603 | 3.40E-08  | 6.59E-05       | 462346      | 30.457913    |
| rs17690703 | T             | C            | 0.262687 | 0.0250342  | 0.0034302 | 2.90E-13  | 0.0001152      | 462346      | 53.262818    |
| rs186347   | T             | G            | 0.463343 | 0.0179489  | 0.0030507 | 4.00E-09  | 7.49E-05       | 462346      | 34.615607    |
| rs1893659  | A             | C            | 0.459939 | -0.029326  | 0.0030531 | 7.60E-22  | 0.0001995      | 462346      | 92.259944    |
| rs1937522  | G             | A            | 0.528054 | 0.0168979  | 0.0030321 | 2.50E-08  | 6.72E-05       | 462346      | 31.058834    |
| rs1991083  | T             | C            | 0.679886 | -0.0223925 | 0.0032581 | 6.30E-12  | 0.0001022      | 462346      | 47.235277    |
| rs2043677  | T             | C            | 0.145599 | 0.0261133  | 0.0043272 | 1.60E-09  | 7.88E-05       | 462346      | 36.417296    |
| rs2159935  | A             | G            | 0.490369 | -0.0185742 | 0.0030258 | 8.30E-10  | 8.15E-05       | 462346      | 37.681847    |
| rs2160935  | T             | C            | 0.604293 | -0.018718  | 0.0030912 | 1.40E-09  | 7.93E-05       | 462346      | 36.66665     |
| rs2244598  | C             | T            | 0.605114 | -0.018378  | 0.0031191 | 3.80E-09  | 7.51E-05       | 462346      | 34.717175    |
| rs2411453  | G             | T            | 0.597353 | -0.0350793 | 0.0030904 | 7.30E-30  | 0.0002786      | 462346      | 128.84672    |
| rs2535911  | T             | C            | 0.354749 | -0.0188476 | 0.0031685 | 2.70E-09  | 7.65E-05       | 462346      | 35.383888    |
| rs2622167  | A             | G            | 0.428653 | -0.0191155 | 0.0030674 | 4.60E-10  | 8.40E-05       | 462346      | 38.835475    |
| rs262240   | T             | C            | 0.468553 | -0.017207  | 0.0030348 | 1.40E-08  | 6.95E-05       | 462346      | 32.146945    |
| rs2717063  | A             | C            | 0.585731 | -0.0203704 | 0.0030846 | 4.00E-11  | 9.43E-05       | 462346      | 43.612198    |
| rs2862224  | T             | C            | 0.280364 | -0.0186203 | 0.0033683 | 3.20E-08  | 6.61E-05       | 462346      | 30.559034    |
| rs28768122 | C             | T            | 0.759525 | 0.0207     | 0.003552  | 5.60E-09  | 7.34E-05       | 462346      | 33.961207    |
| rs28787109 | A             | G            | 0.40423  | 0.0178107  | 0.0030846 | 7.70E-09  | 7.21E-05       | 462346      | 33.339538    |
| rs2924321  | A             | G            | 0.539592 | -0.0195131 | 0.0030502 | 1.60E-10  | 8.85E-05       | 462346      | 40.924967    |
| rs2977454  | G             | C            | 0.124072 | -0.0259222 | 0.0045985 | 1.70E-08  | 6.87E-05       | 462346      | 31.776334    |
| rs34440851 | T             | C            | 0.157151 | -0.0226831 | 0.0041506 | 4.60E-08  | 6.46E-05       | 462346      | 29.866571    |
| rs34473884 | A             | G            | 0.24819  | -0.0203615 | 0.0035035 | 6.20E-09  | 7.31E-05       | 462346      | 33.777176    |
| rs34631026 | T             | C            | 0.446061 | -0.0169128 | 0.0030483 | 2.90E-08  | 6.66E-05       | 462346      | 30.782794    |
| rs34811474 | A             | G            | 0.230728 | -0.0201809 | 0.0035931 | 1.90E-08  | 6.82E-05       | 462346      | 31.546607    |
| rs35105141 | T             | C            | 0.401541 | 0.026345   | 0.0030879 | 1.40E-17  | 0.0001574      | 462346      | 72.790332    |
| rs362307   | T             | C            | 0.074582 | 0.0433047  | 0.0058022 | 8.40E-14  | 0.0001205      | 462346      | 55.703733    |
| rs4241258  | T             | C            | 0.13763  | 0.0250636  | 0.0044033 | 1.30E-08  | 7.01E-05       | 462346      | 32.399502    |
| rs4242715  | A             | G            | 0.680585 | -0.0186543 | 0.0032483 | 9.30E-09  | 7.13E-05       | 462346      | 32.979274    |
| rs4417025  | A             | G            | 0.361153 | -0.0188379 | 0.0031652 | 2.70E-09  | 7.66E-05       | 462346      | 35.421892    |
| rs4503294  | T             | C            | 0.565333 | 0.0181476  | 0.0030705 | 3.40E-09  | 7.55E-05       | 462346      | 34.931814    |
| rs461599   | C             | A            | 0.462259 | -0.0191888 | 0.0030398 | 2.70E-10  | 8.62E-05       | 462346      | 39.84853     |
| rs4726481  | T             | G            | 0.400576 | 0.0217614  | 0.0031019 | 2.30E-12  | 0.0001064      | 462346      | 49.217755    |
| rs473098   | T             | C            | 0.557689 | -0.0217406 | 0.0030435 | 9.10E-13  | 0.0001104      | 462346      | 51.028033    |
| rs489062   | A             | G            | 0.437454 | 0.0166498  | 0.0030529 | 4.90E-08  | 6.43E-05       | 462346      | 29.743232    |
| rs4916723  | C             | A            | 0.420617 | 0.0239479  | 0.0030995 | 1.10E-14  | 0.0001291      | 462346      | 59.696231    |
| rs4940926  | C             | T            | 0.735045 | -0.0191003 | 0.0034407 | 2.80E-08  | 6.66E-05       | 462346      | 30.81697     |
| rs4968391  | T             | G            | 0.674892 | -0.0192695 | 0.0032265 | 2.30E-09  | 7.71E-05       | 462346      | 35.667747    |
| rs5022348  | T             | C            | 0.40703  | 0.0202641  | 0.0035701 | 1.40E-08  | 6.97E-05       | 462346      | 32.218414    |
| rs550942   | T             | C            | 0.823865 | 0.022401   | 0.0039888 | 2.00E-08  | 6.82E-05       | 462346      | 31.538403    |
| rs56194430 | T             | C            | 0.16931  | 0.0225403  | 0.0040715 | 3.10E-08  | 6.63E-05       | 462346      | 30.648759    |
| rs58905411 | A             | G            | 0.410052 | -0.0266343 | 0.0030785 | 5.10E-18  | 0.0001619      | 462346      | 74.852795    |
| rs6030200  | A             | G            | 0.31415  | -0.019529  | 0.0032708 | 2.40E-09  | 7.71E-05       | 462346      | 35.65032     |
| rs61873510 | T             | G            | 0.32785  | 0.0203737  | 0.0033031 | 6.90E-10  | 8.23E-05       | 462346      | 38.044498    |
| rs62305780 | G             | C            | 0.102253 | -0.0485216 | 0.0050659 | 9.90E-22  | 0.0001984      | 462346      | 91.741048    |
| rs62339673 | A             | C            | 0.626705 | 0.0182943  | 0.0031541 | 6.60E-09  | 7.28E-05       | 462346      | 33.64262     |
| rs62466318 | T             | C            | 0.202827 | -0.0254919 | 0.0037742 | 1.40E-11  | 9.87E-05       | 462346      | 45.61973     |
| rs650558   | T             | C            | 0.247918 | 0.0207362  | 0.0035079 | 3.40E-09  | 7.56E-05       | 462346      | 34.94315     |
| rs6727281  | T             | C            | 0.184023 | -0.024322  | 0.0039196 | 5.50E-10  | 8.33E-05       | 462346      | 38.503865    |
| rs6943160  | C             | T            | 0.208646 | 0.020627   | 0.0037277 | 3.10E-08  | 6.62E-05       | 462346      | 30.618156    |
| rs71651683 | T             | C            | 0.0142   | -0.0704589 | 0.0127906 | 3.60E-08  | 6.56E-05       | 462346      | 30.34506     |
| rs72769229 | T             | A            | 0.154942 | -0.0231352 | 0.0041915 | 3.40E-08  | 6.59E-05       | 462346      | 30.464735    |
| rs72787062 | A             | G            | 0.162767 | -0.0281947 | 0.0041032 | 6.40E-12  | 0.0001021      | 462346      | 47.214918    |
| rs728538   | G             | T            | 0.168868 | 0.0228752  | 0.0040626 | 1.80E-08  | 6.86E-05       | 462346      | 31.704575    |
| rs7298932  | G             | A            | 0.147849 | -0.0237214 | 0.0043117 | 3.80E-08  | 6.55E-05       | 462346      | 30.268419    |
| rs7302200  | A             | G            | 0.339998 | -0.0184222 | 0.0031984 | 8.40E-09  | 7.17E-05       | 462346      | 33.175146    |
| rs73050128 | A             | C            | 0.164488 | -0.0260048 | 0.0040909 | 2.10E-10  | 8.74E-05       | 462346      | 40.408402    |
| rs7330939  | T             | C            | 0.720352 | -0.0213301 | 0.0034046 | 3.70E-10  | 8.49E-05       | 462346      | 39.251089    |
| rs74679146 | C             | T            | 0.074515 | -0.0320735 | 0.0055756 | 2.50E-08  | 6.71E-05       | 462346      | 31.032187    |

|            |   |   |          |            |           |          |           |        |           |
|------------|---|---|----------|------------|-----------|----------|-----------|--------|-----------|
| rs7514579  | C | A | 0.232457 | 0.0196672  | 0.0035979 | 4.60E-08 | 6.46E-05  | 462346 | 29.880636 |
| rs76082653 | T | C | 0.054327 | 0.0464269  | 0.0066867 | 3.80E-12 | 0.0001043 | 462346 | 48.206979 |
| rs7610856  | A | C | 0.429053 | -0.023864  | 0.0030702 | 7.70E-15 | 0.0001307 | 462346 | 60.415115 |
| rs780094   | C | T | 0.615206 | -0.0509938 | 0.0031051 | 1.30E-60 | 0.000583  | 462346 | 269.70741 |
| rs780569   | A | T | 0.70882  | 0.0198033  | 0.0033645 | 4.00E-09 | 7.49E-05  | 462346 | 34.643508 |
| rs80292319 | C | T | 0.057704 | -0.0393728 | 0.0064958 | 1.40E-09 | 7.95E-05  | 462346 | 36.7385   |
| rs8043563  | C | G | 0.737192 | 0.0233654  | 0.0034713 | 1.70E-11 | 9.80E-05  | 462346 | 45.307779 |
| rs838145   | A | G | 0.542982 | 0.0219548  | 0.0030555 | 6.70E-13 | 0.0001117 | 462346 | 51.629196 |
| rs8614     | A | C | 0.182509 | 0.0247806  | 0.0039254 | 2.70E-10 | 8.62E-05  | 462346 | 39.852958 |
| rs9349379  | G | A | 0.405493 | -0.0193455 | 0.0030822 | 3.50E-10 | 8.52E-05  | 462346 | 39.395852 |
| rs9372625  | A | G | 0.381706 | -0.0255579 | 0.0031247 | 2.90E-16 | 0.0001447 | 462346 | 66.90216  |
| rs9403297  | A | G | 0.372967 | 0.0188234  | 0.0031304 | 1.80E-09 | 7.82E-05  | 462346 | 36.157877 |
| rs9648478  | A | G | 0.510245 | 0.0168603  | 0.0030289 | 2.60E-08 | 6.70E-05  | 462346 | 30.98532  |
| rs9814516  | T | G | 0.237423 | -0.0251117 | 0.0035559 | 1.60E-12 | 0.0001079 | 462346 | 49.871647 |
| rs9829192  | T | G | 0.435133 | 0.0169324  | 0.0030503 | 2.80E-08 | 6.66E-05  | 462346 | 30.813736 |
| rs9906502  | A | G | 0.176998 | 0.0237883  | 0.0039618 | 1.90E-09 | 7.80E-05  | 462346 | 36.053234 |
| rs9912298  | C | A | 0.239585 | 0.0205894  | 0.0035899 | 9.70E-09 | 7.11E-05  | 462346 | 32.893762 |
| rs9958320  | C | T | 0.153147 | 0.0248553  | 0.0042709 | 5.90E-09 | 7.32E-05  | 462346 | 33.86829  |

### Beef intake

| SNP        | Effect allele | Other allele | EAF      | Beta       | SE        | P value  | R <sup>2</sup> | Sample size | F statistics |
|------------|---------------|--------------|----------|------------|-----------|----------|----------------|-------------|--------------|
| rs10789340 | G             | A            | 0.626712 | -0.0137797 | 0.0017694 | 6.80E-15 | 0.0001315      | 461053      | 60.652015    |
| rs10959890 | C             | T            | 0.212297 | -0.0126658 | 0.0020961 | 1.50E-09 | 7.92E-05       | 461053      | 36.511967    |
| rs1105388  | T             | C            | 0.300147 | -0.0113754 | 0.0018756 | 1.30E-09 | 7.98E-05       | 461053      | 36.782152    |
| rs11165829 | G             | C            | 0.35997  | -0.0102001 | 0.0017787 | 9.80E-09 | 7.13E-05       | 461053      | 32.887131    |
| rs11878917 | A             | G            | 0.109688 | 0.0150187  | 0.0027481 | 4.60E-08 | 6.48E-05       | 461053      | 29.866987    |
| rs132901   | T             | C            | 0.787662 | 0.0139249  | 0.0020928 | 2.90E-11 | 9.60E-05       | 461053      | 44.270918    |
| rs1421085  | C             | T            | 0.403433 | -0.0121232 | 0.0017427 | 3.50E-12 | 0.0001049      | 461053      | 48.391319    |
| rs1470610  | C             | G            | 0.196185 | -0.0122159 | 0.0021578 | 1.50E-08 | 6.95E-05       | 461053      | 32.050197    |
| rs429358   | C             | T            | 0.154226 | -0.0148514 | 0.0023685 | 3.60E-10 | 8.53E-05       | 461053      | 39.318517    |
| rs4676964  | T             | C            | 0.510605 | 0.0133533  | 0.0017244 | 9.60E-15 | 0.00013        | 461053      | 59.966593    |
| rs62169335 | T             | C            | 0.543241 | -0.0096863 | 0.0017352 | 2.40E-08 | 6.76E-05       | 461053      | 31.160044    |
| rs62396185 | C             | G            | 0.260057 | -0.0148447 | 0.001951  | 2.80E-14 | 0.0001255      | 461053      | 57.891863    |
| rs784251   | T             | C            | 0.477649 | -0.0103387 | 0.0017165 | 1.70E-09 | 7.87E-05       | 461053      | 36.277496    |
| rs79809011 | A             | G            | 0.029465 | -0.0280593 | 0.0050848 | 3.40E-08 | 6.60E-05       | 461053      | 30.450934    |

### Bread intake

| SNP        | Effect allele | Other allele | EAF      | Beta       | SE         | P value  | R <sup>2</sup> | Sample size | F statistics |
|------------|---------------|--------------|----------|------------|------------|----------|----------------|-------------|--------------|
| rs10761661 | T             | C            | 0.45322  | -0.0114852 | 0.00200486 | 1.00E-08 | 7.26E-05       | 452236      | 32.81762149  |
| rs11060853 | G             | A            | 0.411804 | -0.012789  | 0.00202087 | 2.50E-10 | 8.86E-05       | 452236      | 40.04926042  |
| rs11183201 | C             | T            | 0.507856 | -0.016725  | 0.00199574 | 5.30E-17 | 0.000155272    | 452236      | 70.22995798  |
| rs11628639 | C             | T            | 0.243333 | -0.013495  | 0.00232226 | 6.20E-09 | 7.47E-05       | 452236      | 33.76930898  |
| rs13023099 | A             | C            | 0.571784 | -0.0114708 | 0.00202287 | 1.40E-08 | 7.11E-05       | 452236      | 32.15507651  |
| rs1492988  | G             | C            | 0.599095 | 0.0115447  | 0.00203549 | 1.40E-08 | 7.11E-05       | 452236      | 32.16810197  |
| rs17083079 | A             | G            | 0.047423 | 0.0301138  | 0.00467938 | 1.20E-10 | 9.16E-05       | 452236      | 41.41451443  |
| rs1940033  | T             | C            | 0.592727 | -0.011079  | 0.00202843 | 4.70E-08 | 6.60E-05       | 452236      | 29.83177907  |
| rs1994315  | C             | T            | 0.685162 | -0.0168239 | 0.00214445 | 4.30E-15 | 0.000136081    | 452236      | 61.5487995   |
| rs2068650  | C             | A            | 0.472074 | -0.013938  | 0.00199929 | 3.10E-12 | 0.000107458    | 452236      | 48.60124697  |
| rs2517678  | T             | C            | 0.368395 | 0.013233   | 0.00208598 | 2.20E-10 | 8.90E-05       | 452236      | 40.24337763  |
| rs28406095 | A             | G            | 0.461729 | -0.010949  | 0.00200012 | 4.40E-08 | 6.63E-05       | 452236      | 29.96642163  |
| rs4665972  | C             | T            | 0.604541 | -0.0142361 | 0.00204335 | 3.20E-12 | 0.000107321    | 452236      | 48.53942362  |
| rs4984685  | A             | G            | 0.201006 | 0.0135849  | 0.00248083 | 4.40E-08 | 6.63E-05       | 452236      | 29.98589121  |
| rs55745436 | T             | C            | 0.237279 | 0.0134245  | 0.00234263 | 1.00E-08 | 7.26E-05       | 452236      | 32.83877262  |
| rs596878   | C             | A            | 0.449595 | -0.011739  | 0.00201069 | 5.30E-09 | 7.54E-05       | 452236      | 34.08552979  |
| rs62091167 | C             | A            | 0.215931 | -0.0138402 | 0.0024253  | 1.20E-08 | 7.20E-05       | 452236      | 32.56505964  |
| rs656817   | G             | A            | 0.334442 | -0.0126883 | 0.00210929 | 1.80E-09 | 8.00E-05       | 452236      | 36.18531594  |
| rs6754311  | C             | T            | 0.264485 | 0.0141353  | 0.00224657 | 3.10E-10 | 8.75E-05       | 452236      | 39.58842549  |
| rs73802707 | T             | C            | 0.153694 | -0.0159296 | 0.00276165 | 8.00E-09 | 7.36E-05       | 452236      | 33.27135946  |
| rs75287965 | A             | G            | 0.062933 | -0.0247475 | 0.00409745 | 1.50E-09 | 8.07E-05       | 452236      | 36.47820165  |
| rs7802468  | T             | C            | 0.371501 | -0.0233527 | 0.00205629 | 6.90E-30 | 0.000285113    | 452236      | 128.9744109  |
| rs79436018 | C             | T            | 0.116276 | -0.0176147 | 0.00311645 | 1.60E-08 | 7.06E-05       | 452236      | 31.94686557  |
| rs9323989  | C             | T            | 0.379169 | -0.0116143 | 0.00205547 | 1.60E-08 | 7.06E-05       | 452236      | 31.92727653  |
| rs9529024  | T             | A            | 0.370396 | -0.0129169 | 0.00206792 | 4.20E-10 | 8.63E-05       | 452236      | 39.01640108  |
| rs9564268  | C             | T            | 0.615619 | -0.0121606 | 0.00204932 | 3.00E-09 | 7.79E-05       | 452236      | 35.21182454  |
| rs9662365  | T             | C            | 0.499481 | 0.0121661  | 0.00198921 | 9.60E-10 | 8.27E-05       | 452236      | 37.40585409  |

### Cereal intake

| SNP        | Effect allele | Other allele | EAF      | Beta       | SE        | P value  | R <sup>2</sup> | Sample size | F statistics |
|------------|---------------|--------------|----------|------------|-----------|----------|----------------|-------------|--------------|
| rs10057775 | C             | T            | 0.893563 | 0.0200293  | 0.0028938 | 4.50E-12 | 0.0001085      | 441640      | 47.906954    |
| rs10857964 | C             | T            | 0.205117 | 0.0140866  | 0.0022053 | 1.70E-10 | 9.24E-05       | 441640      | 40.801398    |
| rs11038810 | G             | A            | 0.644091 | 0.0111343  | 0.0018633 | 2.30E-09 | 8.09E-05       | 441640      | 35.709323    |
| rs11097340 | T             | C            | 0.399592 | -0.0115334 | 0.001815  | 2.10E-10 | 9.14E-05       | 441640      | 40.37892     |
| rs11670024 | G             | A            | 0.115508 | 0.0160114  | 0.0027995 | 1.10E-08 | 7.41E-05       | 441640      | 32.711843    |
| rs11940694 | G             | A            | 0.604068 | -0.0126647 | 0.0018343 | 5.00E-12 | 0.0001079      | 441640      | 47.672295    |
| rs12354267 | C             | T            | 0.309145 | 0.0116473  | 0.0019328 | 1.70E-09 | 8.22E-05       | 441640      | 36.314429    |
| rs13234131 | G             | A            | 0.128369 | 0.0170117  | 0.0026602 | 1.60E-10 | 9.26E-05       | 441640      | 40.894498    |
| rs184643   | A             | G            | 0.56672  | -0.0121653 | 0.0018047 | 1.60E-11 | 0.0001029      | 441640      | 45.437496    |
| rs1853931  | A             | G            | 0.531294 | -0.0113368 | 0.0018102 | 3.80E-10 | 8.88E-05       | 441640      | 39.222952    |
| rs2450126  | G             | A            | 0.156746 | -0.0149019 | 0.0024567 | 1.30E-09 | 8.33E-05       | 441640      | 36.794305    |
| rs2472297  | T             | C            | 0.261458 | -0.0158518 | 0.0020219 | 4.50E-15 | 0.0001392      | 441640      | 61.466736    |
| rs2504706  | C             | T            | 0.234682 | 0.0181793  | 0.0021024 | 5.30E-18 | 0.0001693      | 441640      | 74.770436    |
| rs2799849  | T             | C            | 0.678123 | -0.0123289 | 0.0019057 | 9.80E-11 | 9.48E-05       | 441640      | 41.852745    |
| rs2817377  | A             | G            | 0.537948 | 0.0099008  | 0.0017893 | 3.10E-08 | 6.93E-05       | 441640      | 30.616901    |
| rs2927238  | G             | T            | 0.613181 | 0.0102465  | 0.0018288 | 2.10E-08 | 7.11E-05       | 441640      | 31.391834    |
| rs3115230  | A             | C            | 0.752001 | -0.0114779 | 0.0020713 | 3.00E-08 | 6.95E-05       | 441640      | 30.706669    |
| rs4410790  | C             | T            | 0.630668 | -0.0109143 | 0.001847  | 3.40E-09 | 7.91E-05       | 441640      | 34.91967     |
| rs4739095  | A             | G            | 0.765732 | -0.0128656 | 0.0021052 | 9.90E-10 | 8.46E-05       | 441640      | 37.347284    |
| rs4797242  | A             | C            | 0.297207 | 0.0114312  | 0.0019489 | 4.50E-09 | 7.79E-05       | 441640      | 34.403848    |
| rs491711   | C             | A            | 0.311975 | 0.0116885  | 0.0019337 | 1.50E-09 | 8.27E-05       | 441640      | 36.538892    |
| rs4988235  | A             | G            | 0.736893 | 0.0114     | 0.0020124 | 1.50E-08 | 7.27E-05       | 441640      | 32.090376    |
| rs56131196 | A             | G            | 0.188724 | 0.0180024  | 0.002277  | 2.70E-15 | 0.0001415      | 441640      | 62.51034     |
| rs62442924 | T             | C            | 0.194276 | 0.0127309  | 0.0022571 | 1.70E-08 | 7.20E-05       | 441640      | 31.814016    |
| rs6510177  | C             | T            | 0.805589 | -0.0130354 | 0.0022874 | 1.20E-08 | 7.35E-05       | 441640      | 32.474864    |
| rs6545770  | T             | A            | 0.748101 | -0.013728  | 0.0020604 | 2.70E-11 | 0.0001005      | 441640      | 44.392058    |
| rs67723420 | A             | T            | 0.376335 | 0.0105252  | 0.0018467 | 1.20E-08 | 7.36E-05       | 441640      | 32.485501    |
| rs68136852 | A             | C            | 0.152389 | -0.0141222 | 0.0024785 | 1.20E-08 | 7.35E-05       | 441640      | 32.466234    |
| rs6918737  | A             | T            | 0.234488 | 0.0137325  | 0.0021098 | 7.60E-11 | 9.59E-05       | 441640      | 42.367334    |
| rs7040561  | A             | T            | 0.850635 | -0.0162685 | 0.00252   | 1.10E-10 | 9.44E-05       | 441640      | 41.675909    |
| rs78854891 | C             | T            | 0.065728 | 0.0221411  | 0.0036331 | 1.10E-09 | 8.41E-05       | 441640      | 37.139575    |
| rs79642906 | A             | G            | 0.083314 | -0.0181581 | 0.0032281 | 1.90E-08 | 7.16E-05       | 441640      | 31.600222    |
| rs8097544  | G             | A            | 0.145206 | -0.0246368 | 0.0025411 | 3.20E-22 | 0.0002128      | 441640      | 94.000454    |
| rs838133   | G             | A            | 0.549201 | -0.0206515 | 0.0018433 | 3.90E-29 | 0.0002841      | 441640      | 125.51756    |
| rs9374896  | T             | C            | 0.466274 | 0.0175265  | 0.0017917 | 1.30E-22 | 0.0002166      | 441640      | 95.693421    |
| rs9987289  | G             | A            | 0.908767 | 0.0178679  | 0.0030947 | 7.80E-09 | 7.55E-05       | 441640      | 33.335575    |

### Cheese intake

| SNP         | Effect allele | Other allele | EAF      | Beta       | SE        | P value  | R <sup>2</sup> | Sample size | F statistics |
|-------------|---------------|--------------|----------|------------|-----------|----------|----------------|-------------|--------------|
| rs1073242   | A             | G            | 0.553825 | 0.015728   | 0.0022916 | 6.70E-12 | 0.0001043      | 451486      | 47.106692    |
| rs10896050  | T             | G            | 0.193171 | -0.0184695 | 0.0028344 | 7.20E-11 | 9.40E-05       | 451486      | 42.461194    |
| rs10938397  | G             | A            | 0.434462 | -0.0127071 | 0.0022575 | 1.80E-08 | 7.02E-05       | 451486      | 31.683387    |
| rs113367286 | T             | C            | 0.278467 | 0.0151797  | 0.0024999 | 1.30E-09 | 8.17E-05       | 451486      | 36.871988    |
| rs11620149  | C             | T            | 0.143308 | -0.0176745 | 0.0032085 | 3.60E-08 | 6.72E-05       | 451486      | 30.345078    |
| rs11649653  | G             | C            | 0.38208  | 0.0138485  | 0.0022917 | 1.50E-09 | 8.09E-05       | 451486      | 36.516724    |
| rs12296440  | A             | G            | 0.169681 | 0.0187942  | 0.0029799 | 2.80E-10 | 8.81E-05       | 451486      | 39.779284    |
| rs12447542  | A             | G            | 0.12558  | 0.0197476  | 0.003407  | 6.80E-09 | 7.44E-05       | 451486      | 33.595998    |
| rs12475594  | G             | A            | 0.178459 | 0.0160073  | 0.0029252 | 4.40E-08 | 6.63E-05       | 451486      | 29.945327    |
| rs12672200  | A             | G            | 0.325794 | -0.0137634 | 0.0023946 | 9.00E-09 | 7.32E-05       | 451486      | 33.036809    |
| rs12786959  | T             | A            | 0.196267 | -0.0160712 | 0.0028199 | 1.20E-08 | 7.19E-05       | 451486      | 32.481302    |
| rs1291145   | C             | T            | 0.685848 | -0.0202495 | 0.0024103 | 4.40E-17 | 0.0001563      | 451486      | 70.582802    |
| rs12951057  | G             | C            | 0.165627 | -0.0211557 | 0.0030438 | 3.60E-12 | 0.000107       | 451486      | 48.309447    |
| rs13107325  | T             | C            | 0.074693 | -0.0291639 | 0.0042529 | 7.00E-12 | 0.0001041      | 451486      | 47.025037    |
| rs1434511   | T             | C            | 0.455286 | 0.0129646  | 0.0022587 | 9.50E-09 | 7.30E-05       | 451486      | 32.94632     |
| rs1514755   | G             | A            | 0.239596 | 0.0163749  | 0.0026165 | 3.90E-10 | 8.67E-05       | 451486      | 39.166124    |
| rs17115145  | T             | C            | 0.401282 | -0.0128806 | 0.0022896 | 1.80E-08 | 7.01E-05       | 451486      | 31.649453    |
| rs1806771   | G             | T            | 0.087876 | -0.0221467 | 0.004035  | 4.10E-08 | 6.67E-05       | 451486      | 30.125138    |
| rs1931805   | C             | T            | 0.500062 | 0.0126363  | 0.0022359 | 1.60E-08 | 7.07E-05       | 451486      | 31.939587    |
| rs2352974   | T             | C            | 0.48979  | -0.0144972 | 0.0022428 | 1.00E-10 | 9.25E-05       | 451486      | 41.781617    |
| rs2802530   | A             | G            | 0.876502 | 0.0186266  | 0.003397  | 4.20E-08 | 6.66E-05       | 451486      | 30.065189    |
| rs2854175   | A             | C            | 0.257474 | 0.0169937  | 0.0025686 | 3.70E-11 | 9.69E-05       | 451486      | 43.771473    |
| rs2960578   | G             | T            | 0.496281 | 0.0170282  | 0.0022359 | 2.60E-14 | 0.0001284      | 451486      | 57.998301    |
| rs34198643  | T             | C            | 0.224165 | -0.0167006 | 0.0026786 | 4.50E-10 | 8.61E-05       | 451486      | 38.874311    |
| rs35270670  | G             | A            | 0.217962 | 0.0163794  | 0.0027097 | 1.50E-09 | 8.09E-05       | 451486      | 36.537498    |
| rs3911016   | G             | T            | 0.120938 | 0.0213573  | 0.0034399 | 5.30E-10 | 8.54E-05       | 451486      | 38.547759    |
| rs4296548   | G             | T            | 0.609594 | 0.0130245  | 0.0022878 | 1.20E-08 | 7.18E-05       | 451486      | 32.410094    |
| rs4503172   | T             | C            | 0.608301 | 0.0129596  | 0.002293  | 1.60E-08 | 7.07E-05       | 451486      | 31.942813    |
| rs4681981   | A             | C            | 0.469086 | -0.0124361 | 0.0022412 | 2.90E-08 | 6.82E-05       | 451486      | 30.789411    |
| rs4692708   | C             | A            | 0.252659 | 0.0147298  | 0.002589  | 1.30E-08 | 7.17E-05       | 451486      | 32.36788     |
| rs4776970   | T             | A            | 0.357982 | 0.0154088  | 0.0023268 | 3.50E-11 | 9.71E-05       | 451486      | 43.853716    |
| rs4860341   | C             | T            | 0.928742 | 0.0243652  | 0.0043515 | 2.20E-08 | 6.94E-05       | 451486      | 31.351337    |
| rs504675    | T             | C            | 0.352634 | 0.0274418  | 0.0023418 | 1.00E-31 | 0.000304       | 451486      | 137.31445    |
| rs524468    | G             | A            | 0.260633 | -0.0142421 | 0.0025516 | 2.40E-08 | 6.90E-05       | 451486      | 31.154268    |
| rs531358    | T             | C            | 0.649768 | 0.0131666  | 0.0023373 | 1.80E-08 | 7.03E-05       | 451486      | 31.733116    |
| rs6126641   | A             | G            | 0.336196 | 0.013226   | 0.0023949 | 3.30E-08 | 6.75E-05       | 451486      | 30.498122    |
| rs61953351  | T             | G            | 0.250366 | 0.0145932  | 0.00258   | 1.50E-08 | 7.09E-05       | 451486      | 31.994343    |
| rs62034322  | A             | G            | 0.379848 | -0.0139355 | 0.0022999 | 1.40E-09 | 8.13E-05       | 451486      | 36.714734    |
| rs62236533  | A             | G            | 0.108791 | 0.0247617  | 0.0036467 | 1.10E-11 | 0.0001021      | 451486      | 46.105145    |

|            |   |   |          |            |           |          |           |        |           |
|------------|---|---|----------|------------|-----------|----------|-----------|--------|-----------|
| rs62245792 | A | T | 0.150049 | -0.0179341 | 0.0031632 | 1.40E-08 | 7.12E-05  | 451486 | 32.144908 |
| rs6685323  | T | C | 0.309293 | -0.0131886 | 0.0024159 | 4.80E-08 | 6.60E-05  | 451486 | 29.800968 |
| rs67238148 | T | G | 0.217471 | 0.0165432  | 0.0027143 | 1.10E-09 | 8.23E-05  | 451486 | 37.146254 |
| rs6774906  | C | A | 0.040653 | 0.0316294  | 0.0056726 | 2.50E-08 | 6.89E-05  | 451486 | 31.089419 |
| rs6873324  | C | A | 0.425802 | -0.0124766 | 0.0022707 | 3.90E-08 | 6.69E-05  | 451486 | 30.189755 |
| rs7012814  | A | G | 0.473966 | -0.0185161 | 0.0022539 | 2.10E-16 | 0.0001495 | 451486 | 67.489394 |
| rs71386942 | A | C | 0.268947 | 0.0144554  | 0.0025221 | 9.90E-09 | 7.28E-05  | 451486 | 32.851176 |
| rs72970243 | A | G | 0.12044  | 0.0222011  | 0.0034017 | 6.70E-11 | 9.43E-05  | 451486 | 42.595651 |
| rs7298331  | C | A | 0.604531 | -0.013175  | 0.0023059 | 1.10E-08 | 7.23E-05  | 451486 | 32.645695 |
| rs73024305 | C | G | 0.054789 | 0.0325373  | 0.0049272 | 4.00E-11 | 9.66E-05  | 451486 | 43.607807 |
| rs73096946 | C | T | 0.157396 | -0.0205914 | 0.0030666 | 1.90E-11 | 9.99E-05  | 451486 | 45.086262 |
| rs73335955 | C | T | 0.05334  | 0.0277726  | 0.0049782 | 2.40E-08 | 6.89E-05  | 451486 | 31.12286  |
| rs7386207  | T | C | 0.563517 | -0.0124974 | 0.0022693 | 3.60E-08 | 6.72E-05  | 451486 | 30.330022 |
| rs77742462 | G | A | 0.020525 | -0.0474668 | 0.008278  | 9.80E-09 | 7.28E-05  | 451486 | 32.879329 |
| rs78876700 | A | G | 0.137431 | 0.0180965  | 0.0032785 | 3.40E-08 | 6.75E-05  | 451486 | 30.467132 |
| rs79184944 | A | T | 0.134346 | 0.0196018  | 0.0032846 | 2.40E-09 | 7.89E-05  | 451486 | 35.614782 |
| rs7936836  | A | C | 0.417538 | 0.0159029  | 0.0022727 | 2.60E-12 | 0.0001084 | 451486 | 48.961968 |
| rs919109   | C | G | 0.138752 | 0.0199382  | 0.0032433 | 7.90E-10 | 8.37E-05  | 451486 | 37.791872 |
| rs9504123  | C | A | 0.274743 | 0.0141706  | 0.0025039 | 1.50E-08 | 7.09E-05  | 451486 | 32.029562 |
| rs9649582  | T | A | 0.317256 | -0.0146166 | 0.0024115 | 1.40E-09 | 8.14E-05  | 451486 | 36.73715  |
| rs975303   | G | A | 0.181313 | 0.0212756  | 0.002907  | 2.50E-13 | 0.0001186 | 451486 | 53.564201 |

### Coffee intake

| SNP         | Effect allele | Other allele | EAF      | Beta       | SE        | P value   | R <sup>2</sup> | Sample size | F statistics |
|-------------|---------------|--------------|----------|------------|-----------|-----------|----------------|-------------|--------------|
| rs1057868   | T             | C            | 0.284986 | 0.0199509  | 0.0017852 | 5.40E-29  | 0.0002912      | 428860      | 124.90039    |
| rs117810762 | A             | G            | 0.017881 | 0.0359086  | 0.0061787 | 6.20E-09  | 7.88E-05       | 428860      | 33.775306    |
| rs117968677 | A             | G            | 0.024207 | -0.0310299 | 0.005516  | 1.90E-08  | 7.38E-05       | 428860      | 31.645258    |
| rs12514566  | A             | G            | 0.337107 | -0.0113972 | 0.0017056 | 2.40E-11  | 0.0001041      | 428860      | 44.650852    |
| rs12989746  | T             | G            | 0.249928 | 0.01035    | 0.0018643 | 2.80E-08  | 7.19E-05       | 428860      | 30.821355    |
| rs13054099  | C             | T            | 0.261004 | -0.0107777 | 0.001836  | 4.30E-09  | 8.03E-05       | 428860      | 34.460295    |
| rs13163336  | A             | C            | 0.15761  | 0.0149472  | 0.0022101 | 1.30E-11  | 0.0001066      | 428860      | 45.741823    |
| rs1338549   | G             | T            | 0.533932 | -0.0094512 | 0.0016218 | 5.60E-09  | 7.92E-05       | 428860      | 33.960823    |
| rs13387939  | A             | C            | 0.828363 | 0.0165558  | 0.0021386 | 9.80E-15  | 0.0001397      | 428860      | 59.929298    |
| rs1421085   | C             | T            | 0.40357  | 0.0185426  | 0.0016444 | 1.70E-29  | 0.0002964      | 428860      | 127.15851    |
| rs1527961   | C             | T            | 0.1349   | -0.0133431 | 0.0023659 | 1.70E-08  | 7.42E-05       | 428860      | 31.80805     |
| rs17842490  | G             | A            | 0.014248 | -0.0451683 | 0.0068085 | 3.30E-11  | 0.0001026      | 428860      | 44.011395    |
| rs1942965   | C             | T            | 0.504585 | -0.0089034 | 0.0016192 | 3.80E-08  | 7.05E-05       | 428860      | 30.235968    |
| rs2465037   | A             | C            | 0.343017 | -0.0106317 | 0.0017074 | 4.80E-10  | 9.04E-05       | 428860      | 38.771945    |
| rs2472297   | T             | C            | 0.262883 | 0.0464708  | 0.0018273 | 1.10E-142 | 0.0015058      | 428860      | 646.73193    |
| rs2597805   | T             | C            | 0.682463 | 0.009855   | 0.0017562 | 2.00E-08  | 7.34E-05       | 428860      | 31.488372    |
| rs34060476  | G             | A            | 0.133855 | 0.0184292  | 0.0023703 | 7.50E-15  | 0.0001409      | 428860      | 60.449584    |
| rs4410790   | C             | T            | 0.632141 | 0.039072   | 0.0016729 | 1.20E-120 | 0.0012704      | 428860      | 545.50619    |
| rs442355    | C             | G            | 0.254435 | -0.0111372 | 0.0018537 | 1.90E-09  | 8.42E-05       | 428860      | 36.095442    |
| rs4615895   | A             | G            | 0.740926 | 0.0122025  | 0.0018497 | 4.20E-11  | 0.0001015      | 428860      | 43.519472    |
| rs476828    | C             | T            | 0.237409 | 0.0173461  | 0.0018954 | 5.60E-20  | 0.0001952      | 428860      | 83.75026     |
| rs516636    | A             | C            | 0.208913 | 0.0116767  | 0.0019842 | 4.00E-09  | 8.07E-05       | 428860      | 34.631532    |
| rs56113850  | C             | T            | 0.578109 | 0.0126667  | 0.0016335 | 8.90E-15  | 0.0001402      | 428860      | 60.128636    |
| rs57918684  | A             | G            | 0.154747 | 0.0128864  | 0.0022385 | 8.60E-09  | 7.73E-05       | 428860      | 33.14106     |
| rs6062682   | T             | C            | 0.464546 | 0.0103704  | 0.0016393 | 2.50E-10  | 9.33E-05       | 428860      | 40.02003     |
| rs6063085   | C             | A            | 0.373473 | 0.0104106  | 0.0016692 | 4.50E-10  | 9.07E-05       | 428860      | 38.898956    |
| rs61928609  | C             | A            | 0.835328 | -0.0147305 | 0.0021754 | 1.30E-11  | 0.0001069      | 428860      | 45.853308    |
| rs62064918  | T             | C            | 0.244545 | -0.0103075 | 0.0018787 | 4.10E-08  | 7.02E-05       | 428860      | 30.100974    |
| rs630194    | C             | T            | 0.343374 | -0.0113533 | 0.0016985 | 2.30E-11  | 0.0001042      | 428860      | 44.678209    |
| rs6469262   | C             | T            | 0.564966 | -0.0091535 | 0.001629  | 1.90E-08  | 7.36E-05       | 428860      | 31.575773    |
| rs73075167  | T             | A            | 0.12918  | -0.0160639 | 0.0024443 | 5.00E-11  | 0.0001007      | 428860      | 43.191123    |
| rs75347775  | A             | G            | 0.244531 | 0.0104504  | 0.001879  | 2.70E-08  | 7.21E-05       | 428860      | 30.932818    |
| rs780093    | C             | T            | 0.615839 | 0.0132935  | 0.001657  | 1.00E-15  | 0.0001501      | 428860      | 64.366197    |
| rs7811609   | T             | C            | 0.374746 | 0.0091386  | 0.0016647 | 4.00E-08  | 7.03E-05       | 428860      | 30.13697     |
| rs78267637  | G             | C            | 0.038115 | -0.0254259 | 0.0043166 | 3.90E-09  | 8.09E-05       | 428860      | 34.695172    |
| rs8056750   | T             | C            | 0.359129 | 0.0105333  | 0.0017369 | 1.30E-09  | 8.57E-05       | 428860      | 36.776234    |
| rs9398171   | T             | C            | 0.71064  | 0.0108577  | 0.00178   | 1.10E-09  | 8.68E-05       | 428860      | 37.209861    |



### Cooked vegetable intake

| SNP        | Effect allele | Other allele | EAF      | Beta        | SE         | P value  | R <sup>2</sup> | Sample size | F statistics |
|------------|---------------|--------------|----------|-------------|------------|----------|----------------|-------------|--------------|
| rs10156602 | G             | A            | 0.361369 | 0.0110063   | 0.00163687 | 1.80E-11 | 0.000100763    | 448651      | 45.21186042  |
| rs10161952 | C             | A            | 0.31274  | -0.0095798  | 0.00168589 | 1.30E-08 | 7.20E-05       | 448651      | 32.28884271  |
| rs11138705 | C             | G            | 0.757204 | 0.0103715   | 0.00183004 | 1.40E-08 | 7.16E-05       | 448651      | 32.1188541   |
| rs12550717 | A             | G            | 0.372413 | 0.00918737  | 0.00161897 | 1.40E-08 | 7.18E-05       | 448651      | 32.2034852   |
| rs12629972 | C             | T            | 0.588311 | 0.0117995   | 0.00159079 | 1.20E-13 | 0.000122614    | 448651      | 55.01733741  |
| rs1421085  | C             | T            | 0.40346  | 0.0103316   | 0.00159054 | 8.30E-11 | 9.40E-05       | 448651      | 42.19335311  |
| rs1816263  | C             | T            | 0.280188 | 0.00958122  | 0.00174063 | 3.70E-08 | 6.75E-05       | 448651      | 30.2988929   |
| rs2052063  | T             | C            | 0.515902 | -0.00945755 | 0.0015679  | 1.60E-09 | 8.11E-05       | 448651      | 36.38468637  |
| rs2102738  | C             | A            | 0.172403 | -0.0121578  | 0.00208302 | 5.30E-09 | 7.59E-05       | 448651      | 34.0660025   |
| rs2252508  | G             | A            | 0.480256 | 0.0091021   | 0.00156216 | 5.70E-09 | 7.57E-05       | 448651      | 33.94925455  |
| rs2844672  | A             | G            | 0.624125 | -0.00964215 | 0.00160923 | 2.10E-09 | 8.00E-05       | 448651      | 35.90125167  |
| rs28450747 | A             | G            | 0.23257  | -0.0101604  | 0.0018547  | 4.30E-08 | 6.69E-05       | 448651      | 30.01043784  |
| rs28711392 | C             | T            | 0.367132 | -0.0107461  | 0.00163223 | 4.60E-11 | 9.66E-05       | 448651      | 43.34481041  |
| rs34155012 | T             | C            | 0.227386 | 0.0105584   | 0.00192208 | 3.90E-08 | 6.73E-05       | 448651      | 30.17528402  |
| rs3490062  | C             | G            | 0.39275  | -0.00890406 | 0.00159767 | 2.50E-08 | 6.92E-05       | 448651      | 31.05990041  |
| rs4851029  | G             | T            | 0.526969 | 0.0101744   | 0.00156423 | 7.80E-11 | 9.43E-05       | 448651      | 42.30721695  |
| rs838133   | G             | A            | 0.549575 | 0.0116877   | 0.00161465 | 4.50E-13 | 0.000116773    | 448651      | 52.39615055  |

### Dried fruit intake

| SNP        | Effect allele | Other allele | EAF      | Beta        | SE         | P value  | R <sup>2</sup> | Sample size | F statistics |
|------------|---------------|--------------|----------|-------------|------------|----------|----------------|-------------|--------------|
| rs10026792 | A             | G            | 0.290404 | 0.0108465   | 0.0018423  | 3.90E-09 | 8.22E-05       | 421764      | 34.66222823  |
| rs10129747 | G             | A            | 0.530254 | 0.00935902  | 0.00168126 | 2.60E-08 | 7.35E-05       | 421764      | 30.98767057  |
| rs10740991 | C             | G            | 0.717606 | 0.016739    | 0.00185722 | 2.00E-19 | 0.000192566    | 421764      | 81.23258163  |
| rs10896126 | G             | A            | 0.303582 | -0.015009   | 0.00181919 | 1.60E-16 | 0.000161364    | 421764      | 68.06836761  |
| rs11152349 | A             | G            | 0.302856 | 0.00991215  | 0.0018176  | 4.90E-08 | 7.05E-05       | 421764      | 29.73973153  |
| rs11586016 | C             | G            | 0.371004 | 0.00987818  | 0.00173034 | 1.10E-08 | 7.73E-05       | 421764      | 32.59034193  |
| rs11632215 | C             | A            | 0.120179 | -0.0141434  | 0.00258382 | 4.40E-08 | 7.10E-05       | 421764      | 29.96270909  |
| rs11720884 | G             | A            | 0.250137 | 0.0111797   | 0.00193554 | 7.60E-09 | 7.91E-05       | 421764      | 33.36214289  |
| rs11772627 | C             | G            | 0.18202  | 0.0183338   | 0.00217099 | 3.00E-17 | 0.000169062    | 421764      | 71.31604878  |
| rs11811826 | A             | T            | 0.224231 | 0.0132178   | 0.0020058  | 4.40E-11 | 0.000102951    | 421764      | 43.42512118  |
| rs12137234 | T             | C            | 0.303772 | 0.0102051   | 0.00183744 | 2.80E-08 | 7.31E-05       | 421764      | 30.84651727  |
| rs1582322  | G             | A            | 0.604805 | 0.00994346  | 0.00171571 | 6.80E-09 | 7.96E-05       | 421764      | 33.58808453  |
| rs1622515  | G             | A            | 0.484704 | 0.00991719  | 0.00167077 | 2.90E-09 | 8.35E-05       | 421764      | 35.23237105  |
| rs1648404  | T             | C            | 0.476112 | 0.00941595  | 0.00167357 | 1.80E-08 | 7.50E-05       | 421764      | 31.65471907  |
| rs17175518 | A             | C            | 0.232775 | 0.0114962   | 0.00197514 | 5.90E-09 | 8.03E-05       | 421764      | 33.87745626  |
| rs17184707 | T             | C            | 0.212811 | -0.0114381  | 0.00204011 | 2.10E-08 | 7.45E-05       | 421764      | 31.43392044  |
| rs1797235  | C             | G            | 0.374623 | -0.0100206  | 0.00174235 | 8.90E-09 | 7.84E-05       | 421764      | 33.07612268  |
| rs2328887  | C             | T            | 0.899467 | 0.0189482   | 0.00277607 | 8.80E-12 | 0.000110448    | 421764      | 46.58788932  |
| rs2533273  | A             | C            | 0.48453  | -0.00987659 | 0.00167714 | 3.90E-09 | 8.22E-05       | 421764      | 34.67954235  |
| rs261809   | G             | A            | 0.540636 | -0.00962858 | 0.00167902 | 9.80E-09 | 7.80E-05       | 421764      | 32.88597241  |
| rs3101339  | C             | A            | 0.603285 | 0.0142595   | 0.00170546 | 6.20E-17 | 0.000165723    | 421764      | 69.90744986  |
| rs34162196 | T             | C            | 0.101001 | -0.0223628  | 0.00277168 | 7.10E-16 | 0.000154323    | 421764      | 65.09747207  |
| rs3764002  | T             | C            | 0.261416 | 0.0131215   | 0.00190081 | 5.10E-12 | 0.000112972    | 421764      | 47.65269793  |
| rs4140799  | A             | G            | 0.531856 | 0.0094566   | 0.00167846 | 1.80E-08 | 7.53E-05       | 421764      | 31.74285517  |
| rs4149513  | A             | G            | 0.493537 | 0.01173     | 0.00167139 | 2.20E-12 | 0.000116767    | 421764      | 49.25364388  |
| rs4269101  | G             | T            | 0.718948 | -0.0138099  | 0.00185921 | 1.10E-13 | 0.000130797    | 421764      | 55.17243033  |
| rs429358   | C             | T            | 0.154208 | 0.0199445   | 0.00231362 | 6.70E-18 | 0.000176164    | 421764      | 74.31221173  |
| rs4800488  | A             | C            | 0.489858 | 0.0119836   | 0.00167202 | 7.70E-13 | 0.000121778    | 421764      | 51.36764     |
| rs57499472 | C             | T            | 0.404131 | 0.00991231  | 0.00171869 | 8.10E-09 | 7.89E-05       | 421764      | 33.26232419  |
| rs62084586 | C             | T            | 0.165729 | 0.0133946   | 0.00226174 | 3.20E-09 | 8.32E-05       | 421764      | 35.07293261  |
| rs72720396 | G             | A            | 0.229157 | 0.0114265   | 0.00198541 | 8.70E-09 | 7.85E-05       | 421764      | 33.12256634  |
| rs746868   | G             | C            | 0.614662 | -0.0129055  | 0.00171452 | 5.20E-14 | 0.000134319    | 421764      | 56.65816434  |
| rs75641275 | C             | A            | 0.143372 | -0.0141613  | 0.00238518 | 2.90E-09 | 8.36E-05       | 421764      | 35.250223    |
| rs7582086  | T             | G            | 0.468273 | -0.00962821 | 0.00167381 | 8.80E-09 | 7.84E-05       | 421764      | 33.08847353  |
| rs7599488  | T             | C            | 0.426408 | -0.0104154  | 0.00168729 | 6.70E-10 | 9.03E-05       | 421764      | 38.10398368  |
| rs7808471  | C             | T            | 0.322136 | -0.0115362  | 0.00178604 | 1.10E-10 | 9.89E-05       | 421764      | 41.71969567  |
| rs7829800  | G             | A            | 0.671041 | -0.0104463  | 0.00178709 | 5.10E-09 | 8.10E-05       | 421764      | 34.16882772  |
| rs8081370  | T             | C            | 0.910232 | -0.0166666  | 0.00293795 | 1.40E-08 | 7.63E-05       | 421764      | 32.18126893  |
| rs862227   | G             | A            | 0.458327 | -0.0091646  | 0.00167238 | 4.30E-08 | 7.12E-05       | 421764      | 30.02997973  |
| rs893856   | A             | G            | 0.148988 | -0.013361   | 0.00234923 | 1.30E-08 | 7.67E-05       | 421764      | 32.34631356  |
| rs9385269  | T             | C            | 0.524565 | 0.0120673   | 0.00168183 | 7.20E-13 | 0.000122049    | 421764      | 51.48182925  |

### Fresh fruit intake

| SNP         | Effect allele | Other allele | EAf      | Beta        | SE         | P value  | R <sup>2</sup> | Sample size | F statistics |
|-------------|---------------|--------------|----------|-------------|------------|----------|----------------|-------------|--------------|
| rs10064431  | C             | T            | 0.522495 | -0.00757392 | 0.00122365 | 6.00E-10 | 8.58E-05       | 446462      | 38.311138    |
| rs10192394  | T             | C            | 0.528785 | -0.00766096 | 0.0012287  | 4.50E-10 | 8.71E-05       | 446462      | 38.87520816  |
| rs10249294  | A             | G            | 0.372973 | 0.0195637   | 0.00126299 | 4.10E-54 | 0.000537136    | 446462      | 239.9386548  |
| rs10271924  | T             | C            | 0.492595 | -0.00704676 | 0.00125592 | 2.00E-08 | 7.05E-05       | 446462      | 31.48132933  |
| rs1051547   | C             | T            | 0.561537 | -0.00757523 | 0.00124161 | 1.10E-09 | 8.34E-05       | 446462      | 37.2236793   |
| rs10828266  | G             | A            | 0.715634 | 0.0123642   | 0.00135696 | 8.10E-20 | 0.000185923    | 446462      | 83.02253802  |
| rs10838724  | T             | G            | 0.367992 | 0.00901088  | 0.00128277 | 2.10E-12 | 0.000110511    | 446462      | 49.34405971  |
| rs10840126  | G             | A            | 0.376121 | -0.00771754 | 0.00128576 | 1.90E-09 | 8.07E-05       | 446462      | 36.02765632  |
| rs11032362  | A             | G            | 0.090976 | 0.0123929   | 0.00212339 | 5.30E-09 | 7.63E-05       | 446462      | 34.06311884  |
| rs11085749  | A             | G            | 0.387076 | -0.00773361 | 0.00125477 | 7.10E-10 | 8.51E-05       | 446462      | 37.98694215  |
| rs11248509  | T             | A            | 0.371237 | 0.00732973  | 0.00126801 | 7.40E-09 | 7.48E-05       | 446462      | 33.41401411  |
| rs11896330  | A             | G            | 0.632839 | -0.00844567 | 0.0012744  | 3.40E-11 | 9.84E-05       | 446462      | 43.91923281  |
| rs12044599  | G             | A            | 0.21008  | 0.00942073  | 0.0015033  | 3.70E-10 | 8.80E-05       | 446462      | 39.27135205  |
| rs12536253  | C             | G            | 0.24901  | -0.00815943 | 0.00141599 | 8.30E-09 | 7.44E-05       | 446462      | 33.20452897  |
| rs12641371  | T             | C            | 0.433148 | 0.00791271  | 0.00123354 | 1.40E-10 | 9.22E-05       | 446462      | 41.14736973  |
| rs12780952  | A             | G            | 0.286382 | 0.00747457  | 0.00135361 | 3.40E-08 | 6.83E-05       | 446462      | 30.49182181  |
| rs12885598  | A             | G            | 0.596671 | 0.00751549  | 0.00124738 | 1.70E-09 | 8.13E-05       | 446462      | 36.30070872  |
| rs13072255  | C             | A            | 0.493966 | 0.00898012  | 0.0022355  | 2.10E-13 | 0.000120638    | 446462      | 53.86651662  |
| rs1356292   | T             | C            | 0.807546 | 0.00917471  | 0.00155324 | 3.50E-09 | 7.81E-05       | 446462      | 34.89037308  |
| rs1375566   | A             | G            | 0.627412 | -0.00783382 | 0.001266   | 6.10E-10 | 8.58E-05       | 446462      | 38.28933467  |
| rs139042899 | C             | A            | 0.013469 | 0.035995    | 0.00608106 | 3.20E-09 | 7.85E-05       | 446462      | 35.03675153  |
| rs149449    | A             | G            | 0.489167 | 0.00728855  | 0.00122061 | 2.40E-09 | 7.99E-05       | 446462      | 35.65549598  |
| rs1620977   | G             | A            | 0.730517 | -0.0131742  | 0.00137761 | 1.10E-21 | 0.000204796    | 446462      | 91.45216384  |
| rs17049185  | T             | G            | 0.267872 | 0.00804043  | 0.00139033 | 7.30E-09 | 7.49E-05       | 446462      | 33.44420042  |
| rs1866823   | A             | G            | 0.544469 | 0.00743079  | 0.0012406  | 2.10E-09 | 8.04E-05       | 446462      | 35.87603812  |
| rs2093654   | G             | A            | 0.388133 | 0.00712915  | 0.00125874 | 1.50E-08 | 7.18E-05       | 446462      | 32.07757233  |
| rs2143081   | A             | G            | 0.539822 | 0.00832073  | 0.00122891 | 1.30E-11 | 0.000102672    | 446462      | 45.84381567  |
| rs2790688   | T             | C            | 0.154068 | 0.0114466   | 0.00169613 | 1.50E-11 | 0.000102001    | 446462      | 45.54417048  |
| rs28479795  | T             | C            | 0.221473 | 0.0112324   | 0.00147345 | 2.50E-14 | 0.000130147    | 446462      | 58.11287611  |
| rs2867113   | A             | G            | 0.130942 | -0.0138606  | 0.00196025 | 1.50E-12 | 0.000111972    | 446462      | 49.99645254  |
| rs329274    | G             | A            | 0.485636 | 0.0068183   | 0.00122813 | 2.80E-08 | 6.90E-05       | 446462      | 30.82205464  |
| rs34162196  | T             | C            | 0.1008   | -0.0181417  | 0.0020297  | 4.00E-19 | 0.000178908    | 446462      | 79.8896122   |
| rs4302893   | A             | G            | 0.334189 | 0.00738857  | 0.00129959 | 1.30E-08 | 7.24E-05       | 446462      | 32.3225873   |
| rs4953150   | T             | C            | 0.344088 | -0.00843921 | 0.00129268 | 6.60E-11 | 9.55E-05       | 446462      | 42.62060235  |
| rs559734    | C             | G            | 0.711817 | 0.00776806  | 0.00136078 | 1.10E-08 | 7.30E-05       | 446462      | 32.58722371  |
| rs586346    | C             | T            | 0.635353 | -0.0069217  | 0.00126583 | 4.50E-08 | 6.70E-05       | 446462      | 29.90011306  |
| rs60452247  | A             | G            | 0.363079 | 0.00796969  | 0.00126932 | 3.40E-10 | 8.83E-05       | 446462      | 39.42200113  |
| rs62051554  | A             | G            | 0.108545 | 0.0116118   | 0.00198143 | 4.60E-09 | 7.69E-05       | 446462      | 34.34311469  |
| rs6475724   | T             | C            | 0.727296 | 0.00772163  | 0.00137406 | 1.90E-08 | 7.07E-05       | 446462      | 31.57945534  |
| rs72974263  | T             | C            | 0.318282 | 0.00738684  | 0.00131242 | 1.80E-08 | 7.10E-05       | 446462      | 31.67887564  |
| rs73455661  | G             | A            | 0.279338 | 0.0102938   | 0.0013622  | 4.10E-14 | 0.000127888    | 446462      | 57.10416094  |
| rs739320    | C             | T            | 0.60575  | -0.00899731 | 0.00127708 | 1.90E-12 | 0.000111162    | 446462      | 49.63490738  |
| rs7554485   | C             | T            | 0.611539 | -0.00801014 | 0.00125414 | 1.70E-10 | 9.14E-05       | 446462      | 40.79305478  |
| rs7818437   | C             | T            | 0.235903 | -0.00804815 | 0.00145251 | 3.00E-08 | 6.88E-05       | 446462      | 30.70095723  |
| rs78537042  | A             | C            | 0.086801 | -0.0119259  | 0.00218432 | 4.80E-08 | 6.68E-05       | 446462      | 29.80903087  |
| rs7869969   | G             | A            | 0.330836 | 0.00756738  | 0.00129919 | 5.70E-09 | 7.60E-05       | 446462      | 33.924687057 |
| rs7982441   | C             | T            | 0.731883 | -0.00841258 | 0.00137614 | 9.80E-10 | 8.37E-05       | 446462      | 37.37069991  |
| rs8095324   | G             | A            | 0.404041 | -0.00694613 | 0.00124903 | 2.70E-08 | 6.93E-05       | 446462      | 30.92702385  |
| rs817223    | C             | T            | 0.481314 | -0.00726908 | 0.00122339 | 2.80E-09 | 7.91E-05       | 446462      | 35.30425888  |
| rs862227    | G             | A            | 0.457858 | -0.0101452  | 0.00122398 | 1.10E-16 | 0.000153858    | 446462      | 68.70219894  |
| rs9517948   | T             | C            | 0.451352 | 0.00695315  | 0.00123287 | 1.70E-08 | 7.12E-05       | 446462      | 31.80729098  |
| rs9919429   | G             | A            | 0.486008 | -0.00672322 | 0.00122289 | 3.80E-08 | 6.77E-05       | 446462      | 30.22580753  |
| rs994270    | G             | C            | 0.235126 | 0.0132585   | 0.00144389 | 4.20E-20 | 0.000188823    | 446462      | 84.31767511  |

### Lamb/mutton intake

| SNP         | Effect allele | Other allele | EAf      | Beta       | SE        | P value  | R <sup>2</sup> | Sample size | F statistics |
|-------------|---------------|--------------|----------|------------|-----------|----------|----------------|-------------|--------------|
| rs11090045  | A             | G            | 0.307145 | -0.0106761 | 0.0016066 | 3.00E-11 | 9.60E-05       | 460006      | 44.159492    |
| rs11743441  | T             | G            | 0.574343 | -0.008842  | 0.0014859 | 2.70E-09 | 7.70E-05       | 460006      | 35.408004    |
| rs12634740  | G             | T            | 0.252078 | -0.010087  | 0.0016972 | 2.80E-09 | 7.68E-05       | 460006      | 35.323713    |
| rs136548    | T             | C            | 0.376668 | 0.0095324  | 0.0015123 | 2.90E-10 | 8.64E-05       | 460006      | 39.732406    |
| rs139237013 | A             | G            | 0.057668 | 0.0188989  | 0.0031401 | 1.80E-09 | 7.87E-05       | 460006      | 36.223675    |
| rs1556147   | T             | A            | 0.671626 | 0.0091013  | 0.0015591 | 5.30E-09 | 7.41E-05       | 460006      | 34.07761     |
| rs16891982  | G             | C            | 0.972143 | -0.0242681 | 0.0043644 | 2.70E-08 | 6.72E-05       | 460006      | 30.919078    |
| rs17270057  | C             | T            | 0.113347 | 0.0126533  | 0.002309  | 4.30E-08 | 6.53E-05       | 460006      | 30.030955    |
| rs1958801   | G             | A            | 0.287998 | -0.0089439 | 0.0016175 | 3.20E-08 | 6.65E-05       | 460006      | 30.575231    |
| rs2222760   | A             | G            | 0.28089  | -0.0090929 | 0.0016373 | 2.80E-08 | 6.70E-05       | 460006      | 30.843678    |
| rs2678900   | G             | T            | 0.427924 | 0.0100844  | 0.0014812 | 9.90E-12 | 0.0001008      | 460006      | 46.352877    |
| rs2726033   | G             | A            | 0.422384 | -0.0094897 | 0.0014804 | 1.50E-10 | 8.93E-05       | 460006      | 41.090485    |
| rs276453    | C             | A            | 0.488356 | -0.014237  | 0.0014672 | 2.90E-22 | 0.0002046      | 460006      | 94.153981    |
| rs2926119   | A             | C            | 0.569417 | 0.0081112  | 0.0014818 | 4.40E-08 | 6.51E-05       | 460006      | 29.963744    |
| rs3105056   | C             | T            | 0.732738 | -0.0116241 | 0.0016485 | 1.80E-12 | 0.0001081      | 460006      | 49.718476    |
| rs35797675  | G             | T            | 0.215928 | -0.0108498 | 0.0017934 | 1.40E-09 | 7.96E-05       | 460006      | 36.600519    |
| rs3964074   | C             | T            | 0.547043 | -0.0081411 | 0.0014722 | 3.20E-08 | 6.65E-05       | 460006      | 30.580501    |
| rs4272399   | A             | C            | 0.321491 | -0.0092423 | 0.0015757 | 4.50E-09 | 7.48E-05       | 460006      | 34.405561    |
| rs429358    | C             | T            | 0.154171 | -0.0181966 | 0.0020267 | 2.70E-19 | 0.0001752      | 460006      | 80.6112      |
| rs4489752   | T             | G            | 0.836007 | 0.013811   | 0.0019759 | 2.80E-12 | 0.0001062      | 460006      | 48.858038    |

|            |   |   |          |            |           |          |          |        |           |
|------------|---|---|----------|------------|-----------|----------|----------|--------|-----------|
| rs55813438 | A | G | 0.763165 | -0.0114181 | 0.0017352 | 4.70E-11 | 9.41E-05 | 460006 | 43.299883 |
| rs56394517 | G | A | 0.09584  | -0.0137749 | 0.0024912 | 3.20E-08 | 6.65E-05 | 460006 | 30.57341  |
| rs62106258 | C | T | 0.048562 | 0.0216304  | 0.0034015 | 2.00E-10 | 8.79E-05 | 460006 | 40.436732 |
| rs62398404 | T | C | 0.127211 | 0.0129151  | 0.0021943 | 4.00E-09 | 7.53E-05 | 460006 | 34.64158  |
| rs6581296  | G | C | 0.794714 | 0.0100199  | 0.0018243 | 4.00E-08 | 6.56E-05 | 460006 | 30.166025 |
| rs660880   | A | G | 0.51281  | -0.0090323 | 0.001464  | 6.80E-10 | 8.27E-05 | 460006 | 38.604099 |
| rs673696   | T | C | 0.080995 | 0.0158208  | 0.002682  | 3.70E-09 | 7.56E-05 | 460006 | 34.795613 |
| rs6829572  | A | G | 0.456717 | 0.008401   | 0.0014741 | 1.20E-08 | 7.06E-05 | 460006 | 32.481027 |
| rs7447465  | C | T | 0.619449 | 0.0095823  | 0.0015062 | 2.00E-10 | 8.80E-05 | 460006 | 40.473817 |
| rs7550173  | T | A | 0.610281 | -0.0091239 | 0.0015023 | 1.30E-09 | 8.02E-05 | 460006 | 36.88442  |
| rs994270   | G | C | 0.234851 | 0.0098203  | 0.0017295 | 1.40E-08 | 7.01E-05 | 460006 | 32.241596 |

### Non-oily fish intake

| SNP        | Effect allele | Other allele | EAf      | Beta        | SE         | P value  | R <sup>2</sup> | Sample size | F statistics |
|------------|---------------|--------------|----------|-------------|------------|----------|----------------|-------------|--------------|
| rs11680516 | C             | T            | 0.202388 | 0.0122842   | 0.00202829 | 1.40E-09 | 7.96E-05       | 460880      | 36.68020664  |
| rs1260326  | C             | T            | 0.604249 | -0.00955354 | 0.0016553  | 7.90E-09 | 7.23E-05       | 460880      | 33.30990069  |
| rs16822430 | C             | T            | 0.23321  | 0.0116344   | 0.00191996 | 1.40E-09 | 7.97E-05       | 460880      | 36.71992081  |
| rs17317920 | G             | A            | 0.479238 | 0.00906029  | 0.0016312  | 2.80E-08 | 6.69E-05       | 460880      | 30.8509035   |
| rs35287743 | T             | G            | 0.11583  | -0.0177401  | 0.00255244 | 3.60E-12 | 0.000104802    | 460880      | 48.30578662  |
| rs3799077  | G             | T            | 0.309993 | -0.0107346  | 0.00175764 | 1.00E-09 | 8.09E-05       | 460880      | 37.30009967  |
| rs4318925  | T             | C            | 0.177245 | -0.0150377  | 0.0021207  | 1.30E-12 | 0.000109086    | 460880      | 50.28083433  |
| rs56094641 | G             | A            | 0.404619 | 0.0125875   | 0.00165108 | 2.50E-14 | 0.000126096    | 460880      | 58.12204001  |
| rs6957745  | C             | T            | 0.202978 | -0.0121791  | 0.00202331 | 1.80E-09 | 7.86E-05       | 460880      | 36.23294645  |
| rs7148387  | G             | A            | 0.590715 | -0.00930647 | 0.00165022 | 1.70E-08 | 6.90E-05       | 460880      | 31.80419344  |
| rs838133   | G             | A            | 0.549409 | 0.016184    | 0.00167625 | 4.70E-22 | 0.000202217    | 460880      | 93.21638854  |

### Oily fish intake

| SNP         | Effect allele | Other allele | EAf      | Beta       | SE        | P value  | R <sup>2</sup> | Sample size | F statistics |
|-------------|---------------|--------------|----------|------------|-----------|----------|----------------|-------------|--------------|
| rs10061973  | T             | G            | 0.5139   | -0.0108521 | 0.001916  | 1.50E-08 | 6.97E-05       | 460443      | 32.080693    |
| rs10076975  | C             | T            | 0.381413 | 0.0112394  | 0.0019672 | 1.10E-08 | 7.09E-05       | 460443      | 32.642795    |
| rs10510554  | C             | T            | 0.569277 | 0.0110446  | 0.0019364 | 1.20E-08 | 7.07E-05       | 460443      | 32.533133    |
| rs10513136  | A             | G            | 0.065424 | -0.0233232 | 0.0038631 | 1.60E-09 | 7.92E-05       | 460443      | 36.450982    |
| rs10828250  | G             | C            | 0.309332 | -0.0201462 | 0.0020734 | 2.60E-22 | 0.000205       | 460443      | 94.409135    |
| rs114497213 | T             | G            | 0.05481  | 0.0273225  | 0.0042361 | 1.10E-10 | 9.03E-05       | 460443      | 41.602251    |
| rs11767283  | G             | A            | 0.221709 | 0.0176735  | 0.0023194 | 2.50E-14 | 0.0001261      | 460443      | 58.060491    |
| rs11859365  | C             | A            | 0.253765 | 0.0225669  | 0.0021968 | 9.40E-25 | 0.0002291      | 460443      | 105.5273     |
| rs1201289   | G             | T            | 0.394525 | -0.0107265 | 0.0019595 | 4.40E-08 | 6.51E-05       | 460443      | 29.965647    |
| rs12663865  | A             | G            | 0.758185 | 0.012772   | 0.0022324 | 1.10E-08 | 7.11E-05       | 460443      | 32.732245    |
| rs12855717  | T             | C            | 0.526774 | -0.0122298 | 0.0019228 | 2.00E-10 | 8.79E-05       | 460443      | 40.456768    |
| rs12896749  | C             | G            | 0.384721 | -0.0109641 | 0.0019661 | 2.50E-08 | 6.75E-05       | 460443      | 31.098979    |
| rs12983532  | T             | C            | 0.251137 | -0.0133895 | 0.0022333 | 2.00E-09 | 7.81E-05       | 460443      | 35.943555    |
| rs13070166  | A             | T            | 0.228586 | 0.0142105  | 0.0022781 | 4.40E-10 | 8.45E-05       | 460443      | 38.910557    |
| rs1361016   | G             | T            | 0.844853 | 0.0149567  | 0.002653  | 1.70E-08 | 6.90E-05       | 460443      | 31.784219    |
| rs1421085   | C             | T            | 0.40341  | 0.0184814  | 0.0019487 | 2.50E-21 | 0.0001953      | 460443      | 89.942407    |
| rs16891727  | A             | C            | 0.129814 | -0.0237173 | 0.00284   | 6.80E-17 | 0.0001514      | 460443      | 69.74013     |
| rs17050031  | T             | C            | 0.4801   | -0.0120492 | 0.0019207 | 3.50E-10 | 8.55E-05       | 460443      | 39.354597    |
| rs1876245   | C             | T            | 0.431482 | 0.0151162  | 0.0019312 | 5.00E-15 | 0.000133       | 460443      | 61.266049    |
| rs1951286   | G             | T            | 0.644911 | -0.0145833 | 0.0019995 | 3.00E-13 | 0.0001155      | 460443      | 53.195587    |
| rs2374424   | G             | A            | 0.601525 | -0.0114437 | 0.0019561 | 4.90E-09 | 7.43E-05       | 460443      | 34.225782    |
| rs275160    | C             | T            | 0.700597 | 0.0121188  | 0.002101  | 8.00E-09 | 7.23E-05       | 460443      | 33.27222     |
| rs2827161   | G             | T            | 0.422842 | 0.0107114  | 0.0019372 | 3.20E-08 | 6.64E-05       | 460443      | 30.57357     |
| rs28533540  | A             | G            | 0.534203 | 0.0146421  | 0.0019248 | 2.80E-14 | 0.0001257      | 460443      | 57.868557    |
| rs28623270  | T             | A            | 0.14872  | -0.0178328 | 0.0027375 | 7.30E-11 | 9.22E-05       | 460443      | 42.436702    |
| rs2952140   | T             | C            | 0.482607 | -0.0106774 | 0.001915  | 2.50E-08 | 6.75E-05       | 460443      | 31.086615    |
| rs303817    | G             | A            | 0.751146 | 0.0135799  | 0.0022097 | 8.00E-10 | 8.20E-05       | 460443      | 37.769765    |
| rs3124402   | G             | A            | 0.733261 | -0.0220014 | 0.0021565 | 1.90E-24 | 0.000226       | 460443      | 104.08683    |
| rs34555420  | T             | G            | 0.097821 | -0.0237676 | 0.0032191 | 1.50E-13 | 0.0001184      | 460443      | 54.513647    |
| rs35287743  | T             | G            | 0.115869 | -0.0282201 | 0.0030107 | 7.00E-21 | 0.0001908      | 460443      | 87.8572      |
| rs4002471   | T             | C            | 0.547362 | -0.0192439 | 0.0019244 | 1.50E-23 | 0.0002171      | 460443      | 99.998526    |
| rs4278546   | G             | A            | 0.441085 | 0.0125555  | 0.0019381 | 9.30E-11 | 9.11E-05       | 460443      | 41.969298    |
| rs4510068   | T             | G            | 0.402798 | -0.0130135 | 0.0019708 | 4.00E-11 | 9.47E-05       | 460443      | 43.600596    |
| rs45501495  | T             | C            | 0.236013 | 0.0156803  | 0.0022571 | 3.70E-12 | 0.0001048      | 460443      | 48.26071     |
| rs4869859   | C             | T            | 0.449939 | 0.0140098  | 0.0019221 | 3.10E-13 | 0.0001154      | 460443      | 53.128014    |
| rs4982738   | A             | G            | 0.582899 | 0.0108608  | 0.0019694 | 3.50E-08 | 6.60E-05       | 460443      | 30.413858    |
| rs510161    | G             | C            | 0.31037  | -0.0112998 | 0.0020662 | 4.50E-08 | 6.50E-05       | 460443      | 29.909967    |
| rs552234    | A             | G            | 0.495449 | -0.0116474 | 0.0019125 | 1.10E-09 | 8.05E-05       | 460443      | 37.088915    |
| rs55930451  | T             | C            | 0.108001 | -0.0170539 | 0.0030757 | 2.90E-08 | 6.68E-05       | 460443      | 30.744403    |
| rs55985303  | A             | G            | 0.241079 | 0.0129737  | 0.0022363 | 6.60E-09 | 7.31E-05       | 460443      | 33.656548    |
| rs59355765  | T             | C            | 0.160079 | -0.0162522 | 0.0026097 | 4.70E-10 | 8.42E-05       | 460443      | 38.784176    |
| rs6033437   | A             | C            | 0.257329 | 0.0124683  | 0.0022098 | 1.70E-08 | 6.91E-05       | 460443      | 31.835997    |
| rs6059844   | G             | A            | 0.495121 | 0.0110001  | 0.0019145 | 9.20E-09 | 7.17E-05       | 460443      | 33.012324    |
| rs6089753   | T             | C            | 0.530967 | -0.011542  | 0.0019184 | 1.80E-09 | 7.86E-05       | 460443      | 36.197779    |
| rs61882686  | A             | C            | 0.085234 | 0.0197559  | 0.0034254 | 8.00E-09 | 7.22E-05       | 460443      | 33.263594    |
| rs631490    | C             | G            | 0.709106 | -0.0151398 | 0.0021025 | 6.00E-13 | 0.0001126      | 460443      | 51.850624    |
| rs6465487   | G             | A            | 0.399814 | -0.0123535 | 0.0019563 | 2.70E-10 | 8.66E-05       | 460443      | 39.876416    |
| rs703987    | C             | G            | 0.615005 | 0.0111218  | 0.0019736 | 1.70E-08 | 6.90E-05       | 460443      | 31.755664    |
| rs7243428   | G             | A            | 0.224648 | -0.0129784 | 0.0022921 | 1.50E-08 | 6.96E-05       | 460443      | 32.060163    |
| rs7254235   | G             | A            | 0.577254 | -0.0106304 | 0.0019401 | 4.30E-08 | 6.52E-05       | 460443      | 30.022036    |
| rs75887709  | G             | A            | 0.13588  | -0.0159106 | 0.0028148 | 1.60E-08 | 6.94E-05       | 460443      | 31.950389    |

|           |   |   |          |            |           |          |           |        |           |
|-----------|---|---|----------|------------|-----------|----------|-----------|--------|-----------|
| rs7683782 | G | C | 0.833405 | 0.0144775  | 0.002574  | 1.90E-08 | 6.87E-05  | 460443 | 31.63527  |
| rs790564  | C | A | 0.722952 | 0.0146906  | 0.0021477 | 7.90E-12 | 0.0001016 | 460443 | 46.789254 |
| rs905575  | G | C | 0.82397  | 0.0138824  | 0.0025192 | 3.60E-08 | 6.59E-05  | 460443 | 30.367726 |
| rs9597870 | G | T | 0.245844 | -0.0127449 | 0.0022305 | 1.10E-08 | 7.09E-05  | 460443 | 32.649918 |
| rs9606833 | C | T | 0.243593 | 0.0169856  | 0.0022309 | 2.70E-14 | 0.0001259 | 460443 | 57.971077 |
| rs973526  | T | C | 0.513307 | -0.011507  | 0.0019296 | 2.50E-09 | 7.72E-05  | 460443 | 35.561392 |
| rs9841174 | C | T | 0.373913 | 0.0147781  | 0.0019803 | 8.50E-14 | 0.0001209 | 460443 | 55.692315 |
| rs9889161 | T | G | 0.357929 | -0.0133201 | 0.0020015 | 2.80E-11 | 9.62E-05  | 460443 | 44.289614 |
| rs9958909 | G | T | 0.139718 | 0.0157617  | 0.0027781 | 1.40E-08 | 6.99E-05  | 460443 | 32.189305 |

### Pork intake

| SNP        | Effect allele | Other allele | EAf      | Beta        | SE         | P value  | R <sup>2</sup> | Sample size | F statistics |
|------------|---------------|--------------|----------|-------------|------------|----------|----------------|-------------|--------------|
| rs10972033 | T             | G            | 0.45643  | 0.00897557  | 0.00147851 | 1.30E-09 | 8.01E-05       | 460162      | 36.85306868  |
| rs11211124 | C             | T            | 0.230603 | -0.00995273 | 0.00175408 | 1.40E-08 | 7.00E-05       | 460162      | 32.19465415  |
| rs12721051 | G             | C            | 0.188393 | -0.0123637  | 0.00188666 | 5.60E-11 | 9.33E-05       | 460162      | 42.9445193   |
| rs1355171  | A             | C            | 0.488844 | -0.0109832  | 0.001477   | 1.00E-13 | 0.000120153    | 460162      | 55.29615143  |
| rs2387807  | T             | C            | 0.077893 | -0.0150846  | 0.00274837 | 4.10E-08 | 6.55E-05       | 460162      | 30.12418532  |
| rs34161520 | G             | C            | 0.160381 | 0.0115919   | 0.0020206  | 9.60E-09 | 7.15E-05       | 460162      | 32.9114235   |
| rs36124222 | C             | T            | 0.433239 | 0.00840935  | 0.00150083 | 2.10E-08 | 6.82E-05       | 460162      | 31.39496221  |
| rs3964074  | C             | T            | 0.546932 | -0.00895091 | 0.00148347 | 1.60E-09 | 7.91E-05       | 460162      | 36.40616701  |
| rs4146837  | T             | C            | 0.455561 | 0.00879226  | 0.0014944  | 4.00E-09 | 7.52E-05       | 460162      | 34.61508794  |
| rs7641973  | A             | G            | 0.353362 | 0.00844615  | 0.00154097 | 4.20E-08 | 6.53E-05       | 460162      | 30.04189507  |
| rs9973426  | G             | A            | 0.176598 | 0.0110847   | 0.00193678 | 1.00E-08 | 7.12E-05       | 460162      | 32.75558924  |

### Poultry intake

| SNP       | Effect allele | Other allele | EAf      | Beta       | SE         | P value  | R <sup>2</sup> | Sample size | F statistics |
|-----------|---------------|--------------|----------|------------|------------|----------|----------------|-------------|--------------|
| rs1051730 | A             | G            | 0.331381 | -0.0108759 | 0.00192936 | 1.70E-08 | 6.88E-05       | 461900      | 31.7762022   |
| rs2426440 | G             | A            | 0.732602 | 0.0112177  | 0.00205323 | 4.70E-08 | 6.46E-05       | 461900      | 29.84905318  |
| rs2565017 | A             | G            | 0.372697 | 0.0109515  | 0.00188211 | 5.90E-09 | 7.33E-05       | 461900      | 33.85753454  |
| rs2965200 | A             | G            | 0.640011 | -0.0104197 | 0.00190089 | 4.20E-08 | 6.50E-05       | 461900      | 30.04654758  |
| rs7829800 | G             | A            | 0.670759 | 0.011458   | 0.00194283 | 3.70E-09 | 7.53E-05       | 461900      | 34.78132748  |
| rs9923768 | A             | G            | 0.59853  | 0.0105123  | 0.00185899 | 1.60E-08 | 6.92E-05       | 461900      | 31.97713165  |
| rs9997448 | T             | C            | 0.369236 | -0.0104646 | 0.00188288 | 2.70E-08 | 6.69E-05       | 461900      | 30.88859111  |

### Processed meat intake

| SNP        | Effect allele | Other allele | EAf      | Beta       | SE        | P value  | R <sup>2</sup> | Sample size | F statistics |
|------------|---------------|--------------|----------|------------|-----------|----------|----------------|-------------|--------------|
| rs10454812 | C             | A            | 0.103032 | -0.0199599 | 0.0034421 | 6.70E-09 | 7.28E-05       | 461981      | 33.626018    |
| rs11032380 | T             | A            | 0.333352 | -0.0133229 | 0.002223  | 2.10E-09 | 7.77E-05       | 461981      | 35.919995    |
| rs11887120 | T             | C            | 0.397683 | 0.0119621  | 0.0021604 | 3.10E-08 | 6.64E-05       | 461981      | 30.657206    |
| rs11894162 | T             | C            | 0.547464 | 0.0120489  | 0.002107  | 1.10E-08 | 7.08E-05       | 461981      | 32.701833    |
| rs1422192  | A             | G            | 0.158076 | 0.0169681  | 0.0028713 | 3.40E-09 | 7.56E-05       | 461981      | 34.923154    |
| rs203319   | T             | C            | 0.204594 | -0.016423  | 0.0026019 | 2.80E-10 | 8.62E-05       | 461981      | 39.841461    |
| rs2873054  | C             | A            | 0.353276 | 0.0139958  | 0.0021899 | 1.60E-10 | 8.84E-05       | 461981      | 40.847067    |
| rs34241936 | G             | A            | 0.037369 | 0.0328367  | 0.0057534 | 1.10E-08 | 7.05E-05       | 461981      | 32.574107    |
| rs3762621  | T             | C            | 0.183451 | -0.0149895 | 0.0027197 | 3.60E-08 | 6.57E-05       | 461981      | 30.377105    |
| rs4077924  | C             | T            | 0.701892 | 0.0124987  | 0.0022847 | 4.50E-08 | 6.48E-05       | 461981      | 29.927955    |
| rs4240672  | A             | G            | 0.494014 | 0.0171201  | 0.0020941 | 3.00E-16 | 0.0001447      | 461981      | 66.835559    |
| rs4778053  | G             | C            | 0.843808 | 0.0164667  | 0.0028987 | 1.30E-08 | 6.98E-05       | 461981      | 32.269983    |
| rs6010651  | C             | A            | 0.379439 | -0.0124059 | 0.002168  | 1.10E-08 | 7.09E-05       | 461981      | 32.745539    |
| rs6484504  | C             | T            | 0.72462  | 0.0154728  | 0.0023479 | 4.40E-11 | 9.40E-05       | 461981      | 43.428692    |
| rs6765179  | A             | G            | 0.309968 | -0.0127603 | 0.0022661 | 1.80E-08 | 6.86E-05       | 461981      | 31.708601    |
| rs6786550  | C             | T            | 0.635043 | 0.0121871  | 0.0021741 | 2.10E-08 | 6.80E-05       | 461981      | 31.423013    |
| rs6961970  | A             | C            | 0.244698 | -0.0140142 | 0.0024414 | 9.50E-09 | 7.13E-05       | 461981      | 32.950919    |
| rs77165542 | T             | C            | 0.035496 | 0.0338786  | 0.005725  | 3.30E-09 | 7.58E-05       | 461981      | 35.018296    |
| rs8096167  | C             | T            | 0.1926   | -0.0145937 | 0.0026708 | 4.70E-08 | 6.46E-05       | 461981      | 29.856109    |
| rs838133   | G             | A            | 0.549369 | 0.0190137  | 0.0021656 | 1.60E-18 | 0.0001668      | 461981      | 77.089453    |
| rs9809856  | G             | A            | 0.475881 | 0.0132887  | 0.0020997 | 2.50E-10 | 8.67E-05       | 461981      | 40.055396    |

### Salad/raw vegetable intake

| SNP         | Effect allele | Other allele | EAF      | Beta        | SE         | P value  | R <sup>2</sup> | Sample size | F statistics |
|-------------|---------------|--------------|----------|-------------|------------|----------|----------------|-------------|--------------|
| rs1011939   | A             | G            | 0.715949 | -0.00836985 | 0.00159085 | 1.40E-07 | 6.36E-05       | 435435      | 27.68056117  |
| rs10119957  | G             | C            | 0.221198 | 0.00899063  | 0.00173916 | 2.30E-07 | 6.14E-05       | 435435      | 26.72385945  |
| rs1052352   | T             | C            | 0.52355  | 0.00816444  | 0.00142564 | 1.00E-08 | 7.53E-05       | 435435      | 32.79676927  |
| rs10819082  | A             | G            | 0.66734  | -0.00916475 | 0.00151342 | 1.40E-09 | 8.42E-05       | 435435      | 36.67079393  |
| rs11609549  | T             | C            | 0.068831 | 0.014222    | 0.00281969 | 4.60E-07 | 5.84E-05       | 435435      | 25.4399718   |
| rs11824377  | G             | A            | 0.561266 | -0.00742291 | 0.00143507 | 2.30E-07 | 6.14E-05       | 435435      | 26.75478051  |
| rs12203592  | T             | C            | 0.219338 | -0.0102862  | 0.00169411 | 1.30E-09 | 8.47E-05       | 435435      | 36.8658899   |
| rs12373799  | A             | G            | 0.096051 | -0.0125555  | 0.00245982 | 3.30E-07 | 5.98E-05       | 435435      | 26.05309802  |
| rs12908495  | A             | C            | 0.242533 | -0.00935    | 0.00166573 | 2.00E-08 | 7.24E-05       | 435435      | 31.50735977  |
| rs13020607  | C             | T            | 0.166083 | -0.0100814  | 0.0019136  | 1.40E-07 | 6.37E-05       | 435435      | 27.75475345  |
| rs146555011 | T             | C            | 0.037669 | 0.0190804   | 0.00377612 | 4.40E-07 | 5.86E-05       | 435435      | 25.53179689  |
| rs17460017  | T             | A            | 0.190124 | 0.0111744   | 0.00181338 | 7.20E-10 | 8.72E-05       | 435435      | 37.97246486  |
| rs1890012   | G             | T            | 0.19473  | -0.0104258  | 0.00180794 | 8.10E-09 | 7.64E-05       | 435435      | 33.25437251  |
| rs191948657 | A             | T            | 0.049748 | -0.0176674  | 0.00327126 | 6.60E-08 | 6.70E-05       | 435435      | 29.1684373   |
| rs2866121   | A             | C            | 0.491496 | 0.00743656  | 0.00142892 | 1.90E-07 | 6.22E-05       | 435435      | 27.08484459  |
| rs2897290   | T             | C            | 0.405164 | 0.00810469  | 0.00153135 | 1.20E-07 | 6.43E-05       | 435435      | 28.0105667   |
| rs2924716   | G             | T            | 0.511872 | -0.0077534  | 0.00144371 | 7.90E-08 | 6.62E-05       | 435435      | 28.84180629  |
| rs324499    | A             | T            | 0.838747 | 0.0102272   | 0.00193969 | 1.30E-07 | 6.38E-05       | 435435      | 27.80013146  |
| rs34186148  | C             | G            | 0.370054 | -0.00805142 | 0.0014749  | 4.80E-08 | 6.84E-05       | 435435      | 29.80010664  |
| rs4083969   | G             | C            | 0.057217 | 0.017133    | 0.00311517 | 3.80E-08 | 6.95E-05       | 435435      | 30.24832505  |
| rs4291983   | A             | C            | 0.517576 | -0.00839985 | 0.00142481 | 3.70E-09 | 7.98E-05       | 435435      | 34.75578945  |
| rs4762485   | T             | C            | 0.257137 | -0.00838643 | 0.00163873 | 3.10E-07 | 6.01E-05       | 435435      | 26.19011764  |
| rs56367474  | T             | C            | 0.313191 | -0.00784897 | 0.00153837 | 3.40E-07 | 5.98E-05       | 435435      | 26.03165257  |
| rs57221424  | G             | C            | 0.321733 | 0.00894101  | 0.00153327 | 5.50E-09 | 7.81E-05       | 435435      | 34.00430397  |
| rs62132810  | A             | G            | 0.113144 | 0.0120967   | 0.0023241  | 1.90E-07 | 6.22E-05       | 435435      | 27.09082334  |
| rs62150280  | G             | T            | 0.019736 | -0.0276917  | 0.0051321  | 6.80E-08 | 6.69E-05       | 435435      | 29.1143448   |
| rs62461186  | C             | A            | 0.179827 | -0.0113438  | 0.00185732 | 1.00E-09 | 8.57E-05       | 435435      | 37.3028193   |
| rs638089    | T             | C            | 0.518052 | -0.00748736 | 0.00142893 | 1.60E-07 | 6.30E-05       | 435435      | 27.45576359  |
| rs6482190   | G             | A            | 0.719408 | 0.0112719   | 0.00159025 | 1.40E-12 | 0.000115369    | 435435      | 50.24136743  |
| rs71466817  | T             | C            | 0.211939 | 0.0092934   | 0.00175987 | 1.30E-07 | 6.40E-05       | 435435      | 27.88599142  |
| rs75248709  | T             | C            | 0.045947 | -0.0197339  | 0.00352774 | 2.20E-08 | 7.19E-05       | 435435      | 31.29181202  |
| rs75525887  | C             | G            | 0.021056 | -0.0280819  | 0.00515997 | 5.30E-08 | 6.80E-05       | 435435      | 29.61806139  |
| rs790561    | G             | A            | 0.704134 | 0.012474    | 0.00156199 | 1.40E-15 | 0.000146443    | 435435      | 63.77536992  |
| rs7970482   | A             | G            | 0.311354 | -0.00804053 | 0.00153893 | 1.70E-07 | 6.27E-05       | 435435      | 27.29792441  |
| rs817555    | A             | G            | 0.455008 | -0.00725229 | 0.00143722 | 4.50E-07 | 5.85E-05       | 435435      | 25.46254591  |
| rs9342711   | G             | A            | 0.300663 | 0.00785584  | 0.00155878 | 4.70E-07 | 5.83E-05       | 435435      | 25.39882435  |
| rs9383456   | G             | A            | 0.784931 | 0.00876271  | 0.00173299 | 4.30E-07 | 5.87E-05       | 435435      | 25.56717652  |
| rs9531213   | G             | C            | 0.12717  | -0.0111258  | 0.00215196 | 2.30E-07 | 6.14E-05       | 435435      | 26.72957869  |
| rs9837462   | A             | C            | 0.342977 | 0.00821484  | 0.00150771 | 5.10E-08 | 6.82E-05       | 435435      | 29.68660902  |

### Tea intake

| SNP         | Effect allele | Other allele | EAF      | Beta       | SE        | P value   | R <sup>2</sup> | Sample size | F statistics |
|-------------|---------------|--------------|----------|------------|-----------|-----------|----------------|-------------|--------------|
| rs10741694  | C             | T            | 0.627915 | 0.0150037  | 0.0021936 | 7.90E-12  | 0.0001045      | 447485      | 46.784256    |
| rs10752269  | A             | G            | 0.506082 | -0.0128727 | 0.0021198 | 1.30E-09  | 8.24E-05       | 447485      | 36.87806     |
| rs10764990  | A             | G            | 0.607155 | -0.0121906 | 0.002169  | 1.90E-08  | 7.06E-05       | 447485      | 31.589091    |
| rs11164870  | G             | C            | 0.604574 | -0.0119604 | 0.0021823 | 4.20E-08  | 6.71E-05       | 447485      | 30.036727    |
| rs1156588   | G             | A            | 0.210071 | -0.015454  | 0.0026033 | 2.90E-09  | 7.87E-05       | 447485      | 35.240992    |
| rs11587444  | G             | A            | 0.393464 | 0.0140328  | 0.0021708 | 1.00E-10  | 9.34E-05       | 447485      | 41.788339    |
| rs12591786  | T             | C            | 0.158804 | -0.0184399 | 0.0029424 | 3.70E-10  | 8.78E-05       | 447485      | 39.273798    |
| rs13282783  | T             | C            | 0.285899 | -0.0135837 | 0.0023543 | 7.90E-09  | 7.44E-05       | 447485      | 33.289191    |
| rs132904    | C             | G            | 0.778651 | 0.0166007  | 0.0025526 | 7.80E-11  | 9.45E-05       | 447485      | 42.295634    |
| rs141071726 | A             | G            | 0.026713 | 0.0407321  | 0.006812  | 2.20E-09  | 7.99E-05       | 447485      | 35.753395    |
| rs1453548   | A             | T            | 0.664929 | -0.0133414 | 0.0022497 | 3.00E-09  | 7.86E-05       | 447485      | 35.167385    |
| rs1481012   | G             | A            | 0.112209 | -0.0262435 | 0.0033561 | 5.30E-15  | 0.0001366      | 447485      | 61.147254    |
| rs149805207 | G             | A            | 0.008538 | -0.0719337 | 0.0125823 | 1.10E-08  | 7.30E-05       | 447485      | 32.684571    |
| rs17245213  | A             | G            | 0.208046 | -0.0146481 | 0.0026091 | 2.00E-08  | 7.04E-05       | 447485      | 31.5207      |
| rs17576658  | A             | G            | 0.247081 | -0.0134812 | 0.0024566 | 4.10E-08  | 6.73E-05       | 447485      | 30.116462    |
| rs17685     | A             | G            | 0.277512 | 0.0230655  | 0.002362  | 1.60E-22  | 0.0002131      | 447485      | 95.363549    |
| rs2117137   | G             | A            | 0.405148 | 0.0129948  | 0.0021557 | 1.70E-09  | 8.12E-05       | 447485      | 36.337966    |
| rs2273447   | T             | A            | 0.203788 | 0.0174715  | 0.0026342 | 3.30E-11  | 9.83E-05       | 447485      | 43.990374    |
| rs2279844   | A             | G            | 0.379343 | -0.0119879 | 0.0021832 | 4.00E-08  | 6.74E-05       | 447485      | 30.151241    |
| rs2351187   | A             | G            | 0.318935 | 0.0129023  | 0.0022823 | 1.60E-08  | 7.14E-05       | 447485      | 31.958536    |
| rs2472297   | T             | C            | 0.262049 | 0.0533453  | 0.002401  | 2.30E-109 | 0.0011019      | 447485      | 493.64336    |
| rs2478875   | G             | A            | 0.208758 | 0.0218943  | 0.0026113 | 5.10E-17  | 0.0001571      | 447485      | 70.299134    |
| rs2645929   | G             | A            | 0.813066 | -0.0149842 | 0.0027166 | 3.50E-08  | 6.80E-05       | 447485      | 30.423823    |
| rs4410790   | C             | T            | 0.631224 | 0.0405506  | 0.0021951 | 3.40E-76  | 0.0007621      | 447485      | 341.26825    |
| rs4808193   | C             | T            | 0.335324 | 0.0151149  | 0.0022472 | 1.70E-11  | 0.0001011      | 447485      | 45.240267    |
| rs4817505   | C             | T            | 0.38998  | 0.015068   | 0.0021746 | 4.20E-12  | 0.0001073      | 447485      | 48.012079    |
| rs56188862  | C             | T            | 0.387454 | -0.0157568 | 0.0021747 | 4.30E-13  | 0.0001173      | 447485      | 52.49711     |
| rs56348300  | G             | C            | 0.184619 | 0.0158824  | 0.0027319 | 6.10E-09  | 7.55E-05       | 447485      | 33.798509    |
| rs57462170  | A             | G            | 0.108773 | 0.0191505  | 0.0034056 | 1.90E-08  | 7.07E-05       | 447485      | 31.620109    |
| rs57631352  | G             | A            | 0.296859 | -0.0131035 | 0.0023212 | 1.70E-08  | 7.12E-05       | 447485      | 31.868292    |
| rs6829      | T             | C            | 0.596155 | -0.0119163 | 0.0021655 | 3.70E-08  | 6.77E-05       | 447485      | 30.281723    |
| rs713598    | G             | C            | 0.402254 | 0.0133969  | 0.0021566 | 5.20E-10  | 8.62E-05       | 447485      | 38.58971     |
| rs72797284  | G             | A            | 0.270797 | -0.0171147 | 0.0023835 | 7.00E-13  | 0.0001152      | 447485      | 51.557921    |

|           |   |   |          |            |           |          |           |        |           |
|-----------|---|---|----------|------------|-----------|----------|-----------|--------|-----------|
| rs7757102 | G | A | 0.555426 | -0.0118039 | 0.002133  | 3.10E-08 | 6.84E-05  | 447485 | 30.623812 |
| rs9302428 | G | C | 0.635799 | 0.0122457  | 0.0022012 | 2.60E-08 | 6.92E-05  | 447485 | 30.948413 |
| rs9624470 | A | G | 0.580054 | 0.0252071  | 0.0021549 | 1.30E-31 | 0.0003057 | 447485 | 136.83895 |
| rs9648476 | A | G | 0.622954 | 0.0125013  | 0.0021854 | 1.10E-08 | 7.31E-05  | 447485 | 32.721906 |
| rs977474  | T | C | 0.833746 | 0.0217813  | 0.0028556 | 2.40E-14 | 0.00013   | 447485 | 58.180031 |
| rs9937354 | A | G | 0.424074 | -0.0140923 | 0.0021433 | 4.90E-11 | 9.66E-05  | 447485 | 43.231061 |

### Water intake

| SNP         | Effect allele | Other allele | EAF      | Beta       | SE        | P value  | R <sup>2</sup> | Sample size | F statistics |
|-------------|---------------|--------------|----------|------------|-----------|----------|----------------|-------------|--------------|
| rs10758255  | A             | T            | 0.609855 | -0.0107871 | 0.0018605 | 6.70E-09 | 7.86E-05       | 427588      | 33.617239    |
| rs10892517  | C             | T            | 0.520643 | -0.0094784 | 0.001817  | 1.80E-07 | 6.36E-05       | 427588      | 27.212698    |
| rs10954732  | A             | G            | 0.671297 | 0.0106197  | 0.0019281 | 3.60E-08 | 7.09E-05       | 427588      | 30.337611    |
| rs11012726  | C             | T            | 0.307334 | -0.0122411 | 0.0019794 | 6.20E-10 | 8.94E-05       | 427588      | 38.243969    |
| rs11125629  | G             | A            | 0.546761 | 0.0108674  | 0.001823  | 2.50E-09 | 8.31E-05       | 427588      | 35.538555    |
| rs11140831  | G             | A            | 0.514151 | -0.0123822 | 0.0018361 | 1.50E-11 | 0.0001063      | 427588      | 45.476965    |
| rs11714200  | A             | G            | 0.619968 | -0.0096423 | 0.001864  | 2.30E-07 | 6.26E-05       | 427588      | 26.758562    |
| rs11770515  | T             | C            | 0.204743 | 0.0117475  | 0.0022516 | 1.80E-07 | 6.37E-05       | 427588      | 27.220904    |
| rs117810762 | A             | G            | 0.017776 | -0.0355633 | 0.006957  | 3.20E-07 | 6.11E-05       | 427588      | 26.131498    |
| rs118027723 | T             | C            | 0.025678 | -0.0302224 | 0.0057464 | 1.40E-07 | 6.47E-05       | 427588      | 27.661052    |
| rs11890994  | T             | A            | 0.371683 | 0.0110947  | 0.0018794 | 3.60E-09 | 8.15E-05       | 427588      | 34.85051     |
| rs12620738  | T             | C            | 0.483047 | -0.0093072 | 0.0018187 | 3.10E-07 | 6.12E-05       | 427588      | 26.188355    |
| rs12692772  | A             | C            | 0.124093 | 0.0148281  | 0.0027455 | 6.60E-08 | 6.82E-05       | 427588      | 29.16888     |
| rs12894578  | A             | C            | 0.142195 | -0.0133581 | 0.002601  | 2.80E-07 | 6.17E-05       | 427588      | 26.376875    |
| rs12981418  | T             | G            | 0.378376 | -0.0096882 | 0.0018811 | 2.60E-07 | 6.20E-05       | 427588      | 26.525423    |
| rs1313237   | C             | A            | 0.392005 | 0.0096874  | 0.0018571 | 1.80E-07 | 6.36E-05       | 427588      | 27.210023    |
| rs14135     | C             | T            | 0.217664 | -0.0116877 | 0.0021958 | 1.00E-07 | 6.63E-05       | 427588      | 28.332078    |
| rs1421085   | C             | T            | 0.403711 | 0.01201    | 0.0018458 | 7.70E-11 | 9.90E-05       | 427588      | 42.334641    |
| rs146394874 | A             | C            | 0.049323 | 0.0261419  | 0.0042198 | 5.80E-10 | 8.97E-05       | 427588      | 38.739093    |
| rs1515099   | A             | G            | 0.641505 | 0.0098429  | 0.001888  | 1.90E-07 | 6.36E-05       | 427588      | 27.17987     |
| rs1554704   | C             | T            | 0.656919 | -0.0101722 | 0.0019359 | 1.50E-07 | 6.46E-05       | 427588      | 27.608573    |
| rs16989667  | G             | T            | 0.068516 | 0.0182449  | 0.0035959 | 3.90E-07 | 6.02E-05       | 427588      | 25.743533    |
| rs17348586  | G             | A            | 0.092768 | -0.0157104 | 0.0031241 | 4.90E-07 | 5.91E-05       | 427588      | 25.288958    |
| rs182050989 | T             | C            | 0.02835  | 0.030528   | 0.0054739 | 2.40E-08 | 7.27E-05       | 427588      | 31.103019    |
| rs1963510   | G             | A            | 0.458107 | 0.0133068  | 0.0018195 | 2.60E-13 | 0.0001251      | 427588      | 53.486122    |
| rs2198234   | T             | G            | 0.528757 | 0.0116702  | 0.0018159 | 1.30E-10 | 9.66E-05       | 427588      | 41.300145    |
| rs2229357   | A             | G            | 0.240393 | -0.0122056 | 0.002115  | 7.90E-09 | 7.79E-05       | 427588      | 33.302986    |
| rs2274156   | T             | C            | 0.258771 | -0.011485  | 0.0020706 | 2.90E-08 | 7.19E-05       | 427588      | 30.76605     |
| rs2289292   | T             | C            | 0.334337 | -0.012769  | 0.001927  | 3.40E-11 | 0.0001027      | 427588      | 43.908471    |
| rs2305813   | C             | G            | 0.123354 | -0.019115  | 0.0027686 | 5.00E-12 | 0.0001115      | 427588      | 47.669291    |
| rs2435200   | A             | G            | 0.412694 | 0.0112139  | 0.0018384 | 1.10E-09 | 8.70E-05       | 427588      | 37.20757     |
| rs2472297   | T             | C            | 0.26061  | -0.0334187 | 0.0020571 | 2.40E-59 | 0.0006168      | 427588      | 263.90607    |
| rs2508822   | G             | A            | 0.514091 | 0.0095134  | 0.0018121 | 1.50E-07 | 6.45E-05       | 427588      | 27.562791    |
| rs2535692   | G             | A            | 0.734146 | 0.0109653  | 0.0020491 | 8.70E-08 | 6.70E-05       | 427588      | 28.636861    |
| rs256231    | C             | T            | 0.341685 | -0.0104293 | 0.0019135 | 5.00E-08 | 6.95E-05       | 427588      | 29.707733    |
| rs2656285   | C             | T            | 0.709918 | 0.0122418  | 0.0020072 | 1.10E-09 | 8.70E-05       | 427588      | 37.196571    |
| rs2859264   | T             | C            | 0.232604 | -0.0113494 | 0.0021483 | 1.30E-07 | 6.53E-05       | 427588      | 27.90858     |
| rs34533294  | C             | T            | 0.018562 | 0.0364706  | 0.0068762 | 1.10E-07 | 6.58E-05       | 427588      | 28.131105    |
| rs34940743  | G             | A            | 0.346783 | -0.0103922 | 0.0018985 | 4.40E-08 | 7.01E-05       | 427588      | 29.964709    |
| rs34967813  | G             | A            | 0.311025 | -0.0120553 | 0.0019556 | 7.10E-10 | 8.89E-05       | 427588      | 38.00285     |
| rs35028442  | C             | G            | 0.137272 | 0.0164243  | 0.002688  | 9.90E-10 | 8.73E-05       | 427588      | 37.335855    |
| rs3746410   | G             | A            | 0.20396  | 0.0168391  | 0.0022503 | 7.30E-14 | 0.0001309      | 427588      | 55.998215    |
| rs3763874   | A             | G            | 0.41763  | 0.0163297  | 0.0018396 | 6.90E-19 | 0.0001842      | 427588      | 78.794048    |
| rs3808058   | T             | C            | 0.117807 | 0.0183317  | 0.0028162 | 7.50E-11 | 9.91E-05       | 427588      | 42.373261    |
| rs3933088   | C             | T            | 0.433637 | -0.0100115 | 0.001839  | 5.20E-08 | 6.93E-05       | 427588      | 29.635936    |
| rs393521    | G             | T            | 0.222935 | -0.0114037 | 0.0021758 | 1.60E-07 | 6.42E-05       | 427588      | 27.470058    |
| rs4239466   | C             | A            | 0.391897 | 0.0106426  | 0.0018965 | 2.00E-08 | 7.36E-05       | 427588      | 31.492423    |
| rs429358    | C             | T            | 0.154368 | 0.0166809  | 0.002509  | 3.00E-11 | 0.0001034      | 427588      | 44.201709    |
| rs4329094   | C             | A            | 0.829781 | -0.0122413 | 0.0024152 | 4.00E-07 | 6.01E-05       | 427588      | 25.688979    |
| rs4410790   | C             | T            | 0.629877 | -0.0308714 | 0.0018769 | 8.60E-61 | 0.0006323      | 427588      | 270.54093    |
| rs4541895   | A             | G            | 0.729416 | 0.0106238  | 0.0020431 | 2.00E-07 | 6.32E-05       | 427588      | 27.039039    |
| rs4603502   | C             | T            | 0.292378 | -0.0130724 | 0.0019929 | 5.40E-11 | 0.0001006      | 427588      | 43.025794    |
| rs4668413   | A             | C            | 0.865164 | -0.0140901 | 0.0026468 | 1.00E-07 | 6.63E-05       | 427588      | 28.338529    |
| rs56100328  | G             | A            | 0.090196 | -0.0175542 | 0.0032167 | 4.80E-08 | 6.96E-05       | 427588      | 29.781162    |
| rs570436    | T             | C            | 0.558667 | -0.0095441 | 0.0018261 | 1.70E-07 | 6.39E-05       | 427588      | 27.316121    |
| rs57113772  | G             | T            | 0.061202 | 0.0198627  | 0.0037909 | 1.60E-07 | 6.42E-05       | 427588      | 27.452425    |
| rs58959216  | C             | A            | 0.172618 | -0.012634  | 0.0024204 | 1.80E-07 | 6.37E-05       | 427588      | 27.245492    |
| rs62519779  | A             | G            | 0.171317 | -0.0127651 | 0.002413  | 1.20E-07 | 6.54E-05       | 427588      | 27.985416    |
| rs6541139   | C             | T            | 0.356837 | -0.0101581 | 0.0019104 | 1.10E-07 | 6.61E-05       | 427588      | 28.272566    |
| rs654975    | G             | T            | 0.342381 | -0.0097373 | 0.0019245 | 4.20E-07 | 5.99E-05       | 427588      | 25.59884     |
| rs67174962  | A             | G            | 0.232324 | -0.0122645 | 0.0021566 | 1.30E-08 | 7.56E-05       | 427588      | 32.340774    |
| rs6823219   | G             | A            | 0.30417  | -0.0118007 | 0.0019698 | 2.10E-09 | 8.39E-05       | 427588      | 35.889287    |
| rs6836954   | C             | G            | 0.643183 | -0.0099697 | 0.0018887 | 1.30E-07 | 6.52E-05       | 427588      | 27.863294    |
| rs6844845   | G             | A            | 0.057487 | -0.021514  | 0.0038941 | 3.30E-08 | 7.14E-05       | 427588      | 30.522921    |
| rs6905712   | A             | T            | 0.664977 | 0.0110877  | 0.0019282 | 8.90E-09 | 7.73E-05       | 427588      | 33.066998    |
| rs6933066   | A             | G            | 0.441025 | 0.0092001  | 0.0018242 | 4.60E-07 | 5.95E-05       | 427588      | 25.435823    |
| rs6957745   | C             | T            | 0.202686 | -0.015292  | 0.0022622 | 1.40E-11 | 0.0001069      | 427588      | 45.695777    |
| rs7046799   | C             | T            | 0.334763 | -0.0099034 | 0.0019183 | 2.40E-07 | 6.23E-05       | 427588      | 26.651459    |
| rs7084062   | G             | A            | 0.49244  | 0.0097849  | 0.0018321 | 9.20E-08 | 6.67E-05       | 427588      | 28.525122    |
| rs7124005   | T             | C            | 0.415348 | 0.0103665  | 0.0018604 | 2.50E-08 | 7.26E-05       | 427588      | 31.04981     |
| rs7624543   | T             | C            | 0.628189 | 0.010136   | 0.0018728 | 6.20E-08 | 6.85E-05       | 427588      | 29.292582    |
| rs7626335   | C             | A            | 0.668446 | 0.0107689  | 0.0019327 | 2.50E-08 | 7.26E-05       | 427588      | 31.047079    |

|            |   |   |          |            |           |          |          |        |           |
|------------|---|---|----------|------------|-----------|----------|----------|--------|-----------|
| rs77236002 | C | G | 0.069017 | -0.0185716 | 0.0035822 | 2.20E-07 | 6.29E-05 | 427588 | 26.87785  |
| rs780093   | C | T | 0.614895 | -0.0095048 | 0.0018587 | 3.20E-07 | 6.12E-05 | 427588 | 26.150296 |
| rs782221   | T | C | 0.200429 | -0.0127104 | 0.0022618 | 1.90E-08 | 7.39E-05 | 427588 | 31.580817 |
| rs798687   | C | T | 0.765679 | -0.0111956 | 0.0021468 | 1.80E-07 | 6.36E-05 | 427588 | 27.196282 |
| rs9385778  | C | T | 0.585205 | 0.0097501  | 0.0018426 | 1.20E-07 | 6.55E-05 | 427588 | 27.999549 |
| rs9414686  | T | C | 0.178007 | 0.0147596  | 0.0024063 | 8.60E-10 | 8.80E-05 | 427588 | 37.62187  |
| rs9830293  | G | A | 0.073462 | 0.0190823  | 0.0034748 | 4.00E-08 | 7.05E-05 | 427588 | 30.158156 |
| rs9957088  | T | C | 0.253192 | -0.0118296 | 0.0020872 | 1.40E-08 | 7.51E-05 | 427588 | 32.123777 |

SNP, single nucleotide polymorphism; EAF, effect allele frequency; SE, standard error.

**Table S6. MR estimates of associations between 18 dietary habits and prostate cancer risk**

| Exposures                  | MR methods      | OR (95%CI)                                               | P value                |
|----------------------------|-----------------|----------------------------------------------------------|------------------------|
| Alcohol intake frequency   | MR Egger        | 0.986(0.787, 1.235)                                      | 0.904                  |
|                            | Weighted median | 0.877(0.759, 1.013)                                      | 0.074                  |
|                            | IVW             | 0.928(0.835, 1.031)                                      | 0.163                  |
| Beef intake                | MR Egger        | 0.111(0.001, 13.536)                                     | 0.387                  |
|                            | Weighted median | 1.607(0.848, 3.046)                                      | 0.146                  |
|                            | IVW             | 1.314(0.588, 2.940)                                      | 0.506                  |
| Bread intake               | MR Egger        | 1.423(0.278, 7.281)                                      | 0.676                  |
|                            | Weighted median | 1.277(0.899, 1.814)                                      | 0.172                  |
|                            | IVW             | 1.098(0.767, 1.572)                                      | 0.611                  |
| Cereal intake              | MR Egger        | 0.915(0.267, 3.136)                                      | 0.889                  |
|                            | Weighted median | 0.952(0.667, 1.360)                                      | 0.788                  |
|                            | IVW             | 0.883(0.661, 1.179)                                      | 0.398                  |
| Cheese intake              | MR Egger        | 1.236(0.546, 2.799)                                      | 0.613                  |
|                            | Weighted median | 0.944(0.748, 1.192)                                      | 0.631                  |
|                            | IVW             | 0.950(0.779, 1.159)                                      | 0.614                  |
| Coffee intake              | MR Egger        | 1.505(0.873, 2.597)                                      | 0.150                  |
|                            | Weighted median | 0.919(0.647, 1.304)                                      | 0.635                  |
|                            | IVW             | 0.929(0.700, 1.233)                                      | 0.610                  |
| Cooked vegetable intake    | MR Egger        | 0.002(1.157*10 <sup>-6</sup> , 2.867)                    | 0.114                  |
|                            | Weighted median | 1.125(0.636, 1.991)                                      | 0.686                  |
|                            | IVW             | 1.510(0.739, 3.085)                                      | 0.258                  |
| Dried fruit intake         | MR Egger        | 0.346(0.053, 2.278)                                      | 0.277                  |
|                            | Weighted median | 1.337(0.932, 1.917)                                      | 0.115                  |
|                            | IVW             | 1.144(0.751, 1.743)                                      | 0.530                  |
| Fresh fruit intake         | MR Egger        | 0.623(0.172, 2.260)                                      | 0.475                  |
|                            | Weighted median | 1.379(0.911, 2.087)                                      | 0.129                  |
|                            | IVW             | 1.303(0.892, 1.902)                                      | 0.171                  |
| Lamb/mutton intake         | MR Egger        | 4.582(0.833, 25.201)                                     | 0.091                  |
|                            | Weighted median | 0.971(0.613, 1.537)                                      | 0.900                  |
|                            | IVW             | 1.131(0.725, 1.762)                                      | 0.588                  |
| Non-oily fish intake       | MR Egger        | 0.352(0.011, 10.929)                                     | 0.566                  |
|                            | Weighted median | 0.694(0.370, 1.302)                                      | 0.255                  |
|                            | IVW             | 0.936(0.463, 1.891)                                      | 0.854                  |
| Oily fish intake           | MR Egger        | 2.589(0.998, 6.713)                                      | 0.055                  |
|                            | Weighted median | 1.118(0.870, 1.437)                                      | 0.382                  |
|                            | IVW             | 1.147(0.904, 1.454)                                      | 0.258                  |
| Pork intake                | MR Egger        | 12.791(0.298, 549.333)                                   | 0.217                  |
|                            | Weighted median | 2.141(1.008, 4.546)                                      | 0.048                  |
|                            | IVW             | 2.264(1.236, 4.145)                                      | 0.008                  |
| Poultry intake             | MR Egger        | 0.072(1.756*10 <sup>-19</sup> , 2.972*10 <sup>16</sup> ) | 0.904                  |
|                            | Weighted median | 1.312(0.526, 3.271)                                      | 0.561                  |
|                            | IVW             | 1.080(0.307, 3.795)                                      | 0.904                  |
| Processed meat intake      | MR Egger        | 0.279(0.046, 1.695)                                      | 0.181                  |
|                            | Weighted median | 0.809(0.537, 1.219)                                      | 0.311                  |
|                            | IVW             | 0.945(0.643, 1.389)                                      | 0.773                  |
| Salad/raw vegetable intake | MR Egger        | 1.908(0.529, 6.884)                                      | 0.330                  |
|                            | Weighted median | 1.249(0.781, 1.995)                                      | 0.353                  |
|                            | IVW             | 1.809(1.298, 2.522)                                      | 4.689*10 <sup>-4</sup> |
| Tea intake                 | MR Egger        | 1.462(0.863, 2.479)                                      | 0.167                  |
|                            | Weighted median | 0.990(0.763, 1.285)                                      | 0.939                  |
|                            | IVW             | 1.106(0.802, 1.286)                                      | 0.897                  |
| Water intake               | MR Egger        | 0.727(0.382, 1.385)                                      | 0.336                  |
|                            | Weighted median | 0.884(0.681, 1.148)                                      | 0.355                  |
|                            | IVW             | 0.843(0.679, 1.046)                                      | 0.120                  |

OR, odds ratio; CI, confidence interval; IVW, inverse variance weighted.



**Table S7. Consolidated data overview of 19 daily nutrient intakes pertaining to prostate cancer risk**

| Exposures             | Consortium | Ancestry | Sample size | Number of IVs | Unit | R <sup>2</sup> (%) | F-statistic |
|-----------------------|------------|----------|-------------|---------------|------|--------------------|-------------|
| Energy                | UK Biobank | European | 64979       | 4             | SD   | 0.002              | 26.499      |
| Carbohydrate          | UK Biobank | European | 64979       | 18            | SD   | 0.006              | 22.982      |
| Englyst dietary fibre | UK Biobank | European | 64979       | 4             | SD   | 0.002              | 25.708      |
| Protein               | UK Biobank | European | 64979       | 70            | SD   | 0.020              | 19.147      |
| Fat                   | UK Biobank | European | 64979       | 13            | SD   | 0.005              | 23.283      |
| Polyunsaturated fat   | UK Biobank | European | 64979       | 16            | SD   | 0.005              | 22.303      |
| Saturated fat         | UK Biobank | European | 64979       | 11            | SD   | 0.004              | 23.156      |
| Carotene              | UK Biobank | European | 64979       | 15            | SD   | 0.005              | 22.618      |
| Folate                | UK Biobank | European | 64979       | 14            | SD   | 0.005              | 22.689      |
| Retinol               | UK Biobank | European | 62991       | 7             | SD   | 0.003              | 23.552      |
| Vitamin B6            | UK Biobank | European | 64979       | 17            | SD   | 0.006              | 23.292      |
| Vitamin B12           | UK Biobank | European | 64979       | 9             | SD   | 0.003              | 22.695      |
| Vitamin C             | UK Biobank | European | 64979       | 11            | SD   | 0.004              | 23.191      |
| Vitamin D             | UK Biobank | European | 64979       | 12            | SD   | 0.004              | 22.086      |
| Vitamin E             | UK Biobank | European | 64979       | 12            | SD   | 0.004              | 23.664      |
| Calcium               | UK Biobank | European | 64979       | 18            | SD   | 0.006              | 23.493      |
| Iron                  | UK Biobank | European | 64979       | 3             | SD   | 0.001              | 26.396      |
| Magnesium             | UK Biobank | European | 64979       | 4             | SD   | 0.002              | 26.396      |
| Potassium             | UK Biobank | European | 64979       | 15            | SD   | 0.005              | 22.151      |

IVs, instrumental variables.

**Table S8. Instrumental variables of 19 daily nutrient intakes for prostate cancer risk**

**Energy**

| SNP         | Effect allele | Other allele | EAf      | Beta       | SE        | P value  | R <sup>2</sup> | Sample size | F statistics |
|-------------|---------------|--------------|----------|------------|-----------|----------|----------------|-------------|--------------|
| rs11224098  | G             | A            | 0.14422  | -0.0391522 | 0.0075214 | 1.90E-07 | 0.0004168      | 64979       | 27.095993    |
| rs12528608  | T             | G            | 0.214023 | 0.0329371  | 0.006473  | 3.60E-07 | 0.0003983      | 64979       | 25.89068     |
| rs149006866 | G             | C            | 0.024868 | 0.0909711  | 0.0175862 | 2.30E-07 | 0.0004116      | 64979       | 26.757745    |
| rs62347998  | T             | C            | 0.042331 | 0.0689419  | 0.0134879 | 3.20E-07 | 0.0004019      | 64979       | 26.125491    |

**Carbohydrate**

| SNP         | Effect allele | Other allele | EAf      | Beta       | SE        | P value  | R <sup>2</sup> | Sample size | F statistics |
|-------------|---------------|--------------|----------|------------|-----------|----------|----------------|-------------|--------------|
| rs11132733  | C             | T            | 0.815648 | -0.0321747 | 0.0069328 | 3.50E-06 | 0.0003314      | 64979       | 21.537587    |
| rs112137399 | T             | C            | 0.088931 | 0.0497284  | 0.0096979 | 2.90E-07 | 0.0004045      | 64979       | 26.293112    |
| rs11224098  | G             | A            | 0.14422  | -0.0369951 | 0.007657  | 1.40E-06 | 0.0003591      | 64979       | 23.342936    |
| rs11693885  | A             | G            | 0.444547 | -0.0251199 | 0.0054307 | 3.70E-06 | 0.0003292      | 64979       | 21.395243    |
| rs12715219  | T             | C            | 0.545558 | -0.0254623 | 0.0054305 | 2.70E-06 | 0.0003382      | 64979       | 21.983451    |
| rs13052873  | A             | G            | 0.223264 | -0.0317059 | 0.0064469 | 8.70E-07 | 0.0003721      | 64979       | 24.186049    |
| rs148088494 | G             | T            | 0.014043 | -0.116679  | 0.0244032 | 1.70E-06 | 0.0003517      | 64979       | 22.860118    |
| rs3185777   | C             | T            | 0.710914 | 0.0274165  | 0.0059231 | 3.70E-06 | 0.0003296      | 64979       | 21.42488     |
| rs35237101  | G             | A            | 0.041626 | 0.0704413  | 0.0138894 | 3.90E-07 | 0.0003957      | 64979       | 25.720203    |
| rs546217    | C             | A            | 0.429996 | 0.0255618  | 0.005442  | 2.60E-06 | 0.0003394      | 64979       | 22.06214     |
| rs58370602  | T             | C            | 0.014894 | 0.106134   | 0.0224458 | 2.30E-06 | 0.000344       | 64979       | 22.357617    |
| rs59150700  | A             | G            | 0.018534 | -0.0928491 | 0.0200214 | 3.50E-06 | 0.0003309      | 64979       | 21.505678    |
| rs6089697   | A             | G            | 0.465691 | -0.0248143 | 0.0054123 | 4.50E-06 | 0.0003234      | 64979       | 21.019722    |
| rs62347998  | T             | C            | 0.042331 | 0.0685335  | 0.0137318 | 6.00E-07 | 0.0003832      | 64979       | 24.907923    |
| rs6416839   | C             | A            | 0.346393 | -0.0272292 | 0.0056539 | 1.50E-06 | 0.0003568      | 64979       | 23.192844    |
| rs68133983  | C             | G            | 0.065702 | 0.0498539  | 0.0108119 | 4.00E-06 | 0.0003271      | 64979       | 21.260862    |
| rs7803193   | G             | C            | 0.071804 | 0.0494934  | 0.0105982 | 3.00E-06 | 0.0003355      | 64979       | 21.808058    |
| rs9399996   | C             | G            | 0.159794 | 0.0363607  | 0.007354  | 7.60E-07 | 0.0003761      | 64979       | 24.445578    |

**Englyst dietary fibre**

| SNP         | Effect allele | Other allele | EAf      | Beta       | SE        | P value  | R <sup>2</sup> | Sample size | F statistics |
|-------------|---------------|--------------|----------|------------|-----------|----------|----------------|-------------|--------------|
| rs112995058 | A             | G            | 0.102768 | 0.0455091  | 0.0090105 | 4.40E-07 | 0.0003924      | 64979       | 25.508298    |
| rs17119113  | G             | A            | 0.082615 | 0.0504672  | 0.0100292 | 4.90E-07 | 0.0003895      | 64979       | 25.320511    |
| rs5746795   | G             | A            | 0.309155 | -0.0303749 | 0.0059714 | 3.60E-07 | 0.0003981      | 64979       | 25.874373    |
| rs7542974   | A             | G            | 0.252505 | 0.0322713  | 0.0063273 | 3.40E-07 | 0.0004002      | 64979       | 26.012454    |

**Protein**

| SNP         | Effect allele | Other allele | EAf      | Beta       | SE        | P value  | R <sup>2</sup> | Sample size | F statistics |
|-------------|---------------|--------------|----------|------------|-----------|----------|----------------|-------------|--------------|
| rs1008140   | C             | T            | 0.021152 | -0.0821874 | 0.0191046 | 1.70E-05 | 0.0002847      | 64979       | 18.506369    |
| rs10280693  | G             | A            | 0.221441 | 0.027107   | 0.0064576 | 2.70E-05 | 0.0002711      | 64979       | 17.620219    |
| rs10746379  | G             | A            | 0.131935 | 0.0334025  | 0.007923  | 2.50E-05 | 0.0002735      | 64979       | 17.77332     |
| rs10859042  | G             | A            | 0.026115 | 0.0721161  | 0.0168578 | 1.90E-05 | 0.0002816      | 64979       | 18.299925    |
| rs112192448 | T             | C            | 0.009532 | -0.113484  | 0.027786  | 4.40E-05 | 0.0002566      | 64979       | 16.680299    |
| rs113315814 | T             | C            | 0.057303 | -0.0475572 | 0.0117024 | 4.80E-05 | 0.0002541      | 64979       | 16.514648    |
| rs113719850 | G             | T            | 0.085963 | -0.0456569 | 0.0098101 | 3.30E-06 | 0.0003332      | 64979       | 21.659753    |
| rs114413056 | G             | A            | 0.008107 | 0.129347   | 0.030309  | 2.00E-05 | 0.0002802      | 64979       | 18.211937    |
| rs114989460 | C             | T            | 0.018108 | 0.0884116  | 0.0208963 | 2.30E-05 | 0.0002754      | 64979       | 17.900549    |
| rs116330334 | A             | T            | 0.013267 | -0.10133   | 0.0235302 | 1.70E-05 | 0.0002853      | 64979       | 18.544344    |
| rs117140790 | G             | A            | 0.030888 | 0.0644439  | 0.0156391 | 3.80E-05 | 0.0002612      | 64979       | 16.979572    |
| rs11729302  | G             | C            | 0.139422 | 0.0360096  | 0.0077158 | 3.10E-06 | 0.0003351      | 64979       | 21.780003    |
| rs11822686  | G             | A            | 0.016678 | 0.0889626  | 0.0211219 | 2.50E-05 | 0.0002729      | 64979       | 17.739264    |
| rs12147516  | T             | G            | 0.123005 | 0.0374676  | 0.0081942 | 4.80E-06 | 0.0003217      | 64979       | 20.906587    |
| rs12506509  | T             | C            | 0.020995 | 0.0866733  | 0.0188848 | 4.40E-06 | 0.0003241      | 64979       | 21.063596    |
| rs12931912  | A             | G            | 0.273194 | -0.0269101 | 0.0061035 | 1.00E-05 | 0.0002991      | 64979       | 19.438093    |
| rs13048538  | G             | A            | 0.238985 | -0.0267983 | 0.0062879 | 2.00E-05 | 0.0002795      | 64979       | 18.162922    |
| rs1332160   | A             | C            | 0.602944 | -0.0232962 | 0.0055344 | 2.60E-05 | 0.0002726      | 64979       | 17.718042    |
| rs1379217   | G             | A            | 0.070311 | -0.0477734 | 0.0105608 | 6.10E-06 | 0.0003148      | 64979       | 20.462811    |
| rs138811846 | T             | C            | 0.027246 | -0.0699723 | 0.0171852 | 4.70E-05 | 0.0002551      | 64979       | 16.577909    |
| rs139053978 | C             | T            | 0.021898 | 0.0774835  | 0.0189474 | 4.30E-05 | 0.0002573      | 64979       | 16.722679    |
| rs139408647 | G             | A            | 0.012412 | -0.11201   | 0.0256319 | 1.20E-05 | 0.0002938      | 64979       | 19.095834    |
| rs140283315 | T             | G            | 0.018825 | 0.102589   | 0.0210183 | 1.10E-06 | 0.0003665      | 64979       | 23.822814    |
| rs141186922 | T             | C            | 0.017422 | 0.10147    | 0.0243714 | 3.10E-05 | 0.0002667      | 64979       | 17.334088    |
| rs141559781 | A             | G            | 0.023724 | -0.0773725 | 0.0183672 | 2.50E-05 | 0.000273       | 64979       | 17.744917    |
| rs148244439 | T             | C            | 0.05238  | 0.0592229  | 0.0121529 | 1.10E-06 | 0.0003653      | 64979       | 23.746856    |
| rs148753985 | C             | T            | 0.00858  | -0.134305  | 0.0297728 | 6.50E-06 | 0.0003131      | 64979       | 20.348464    |
| rs149345111 | T             | C            | 0.022663 | -0.0850755 | 0.0185493 | 4.50E-06 | 0.0003236      | 64979       | 21.034907    |
| rs155599    | C             | T            | 0.705232 | 0.0261492  | 0.0059095 | 9.60E-06 | 0.0003012      | 64979       | 19.579848    |
| rs17371669  | G             | C            | 0.013291 | 0.102728   | 0.023464  | 1.20E-05 | 0.0002949      | 64979       | 19.167267    |
| rs17700462  | G             | T            | 0.024999 | 0.0759902  | 0.0176468 | 1.70E-05 | 0.0002853      | 64979       | 18.542568    |
| rs1981644   | A             | C            | 0.883661 | 0.0355557  | 0.0083972 | 2.30E-05 | 0.0002758      | 64979       | 17.928133    |
| rs2356007   | T             | C            | 0.038512 | -0.0610143 | 0.014008  | 1.30E-05 | 0.0002919      | 64979       | 18.971324    |

|             |   |   |          |            |           |          |           |       |           |
|-------------|---|---|----------|------------|-----------|----------|-----------|-------|-----------|
| rs2370422   | T | C | 0.273366 | -0.0261929 | 0.0060281 | 1.40E-05 | 0.0002905 | 64979 | 18.879605 |
| rs2431754   | C | T | 0.558797 | 0.0259888  | 0.0054377 | 1.80E-06 | 0.0003514 | 64979 | 22.841541 |
| rs2577192   | G | A | 0.879954 | -0.0352365 | 0.0082746 | 2.10E-05 | 0.000279  | 64979 | 18.133486 |
| rs2649397   | G | A | 0.416964 | -0.0240763 | 0.0058276 | 3.60E-05 | 0.0002626 | 64979 | 17.068041 |
| rs2720584   | A | C | 0.779271 | -0.0277939 | 0.0065145 | 2.00E-05 | 0.0002801 | 64979 | 18.202237 |
| rs28417233  | A | G | 0.215547 | 0.0285034  | 0.0065289 | 1.30E-05 | 0.0002932 | 64979 | 19.059226 |
| rs3219142   | A | G | 0.205006 | 0.0279767  | 0.0066209 | 2.40E-05 | 0.0002747 | 64979 | 17.85452  |
| rs35235621  | A | G | 0.019199 | 0.0807528  | 0.0195156 | 3.50E-05 | 0.0002634 | 64979 | 17.12135  |
| rs3772928   | C | T | 0.575413 | -0.0233348 | 0.0054639 | 1.90E-05 | 0.0002806 | 64979 | 18.238441 |
| rs4733817   | A | G | 0.364498 | -0.022668  | 0.0055845 | 4.90E-05 | 0.0002535 | 64979 | 16.475486 |
| rs55656727  | C | T | 0.072382 | 0.0431349  | 0.010567  | 4.50E-05 | 0.0002564 | 64979 | 16.662525 |
| rs56280650  | C | T | 0.033592 | -0.0687055 | 0.0152213 | 6.40E-06 | 0.0003135 | 64979 | 20.373524 |
| rs563970361 | T | C | 0.007457 | 0.146091   | 0.0337543 | 1.50E-05 | 0.0002882 | 64979 | 18.73162  |
| rs6014527   | A | G | 0.181425 | -0.0315952 | 0.0069767 | 5.90E-06 | 0.0003155 | 64979 | 20.508375 |
| rs61872990  | C | T | 0.17418  | 0.0311454  | 0.0070857 | 1.10E-05 | 0.0002972 | 64979 | 19.319863 |
| rs62091230  | C | A | 0.141621 | 0.0364768  | 0.0078434 | 3.30E-06 | 0.0003327 | 64979 | 21.627862 |
| rs62217435  | C | T | 0.013173 | -0.0984647 | 0.0235367 | 2.90E-05 | 0.0002693 | 64979 | 17.500748 |
| rs62256015  | C | G | 0.068512 | -0.0437991 | 0.0107306 | 4.50E-05 | 0.0002563 | 64979 | 16.65977  |
| rs67926498  | C | T | 0.101556 | -0.0363691 | 0.0088743 | 4.20E-05 | 0.0002584 | 64979 | 16.795174 |
| rs6807490   | A | C | 0.87911  | -0.034137  | 0.0082629 | 3.60E-05 | 0.0002626 | 64979 | 17.067678 |
| rs71482324  | A | C | 0.032002 | 0.0676466  | 0.0159084 | 2.10E-05 | 0.0002782 | 64979 | 18.08113  |
| rs72820075  | T | C | 0.085759 | 0.0428957  | 0.0095824 | 7.60E-06 | 0.0003083 | 64979 | 20.038391 |
| rs72935945  | T | C | 0.194485 | -0.032541  | 0.0071541 | 5.40E-06 | 0.0003183 | 64979 | 20.689179 |
| rs73165266  | A | G | 0.073424 | 0.0452276  | 0.0106114 | 2.00E-05 | 0.0002795 | 64979 | 18.165541 |
| rs75944175  | A | C | 0.039742 | 0.0578181  | 0.0139223 | 3.30E-05 | 0.0002653 | 64979 | 17.246155 |
| rs76394198  | C | G | 0.039482 | -0.0638471 | 0.0144304 | 9.70E-06 | 0.0003012 | 64979 | 19.575472 |
| rs76457983  | C | T | 0.01799  | -0.0871938 | 0.0201813 | 1.60E-05 | 0.0002872 | 64979 | 18.666357 |
| rs77644716  | C | G | 0.098992 | -0.0380864 | 0.0090093 | 2.40E-05 | 0.000275  | 64979 | 17.870816 |
| rs77806858  | C | T | 0.070369 | -0.0436016 | 0.0104754 | 3.20E-05 | 0.0002665 | 64979 | 17.324083 |
| rs77878440  | T | C | 0.121191 | -0.0374349 | 0.0082425 | 5.60E-06 | 0.0003173 | 64979 | 20.626135 |
| rs77894219  | T | C | 0.052561 | -0.0529539 | 0.0120699 | 1.10E-05 | 0.0002961 | 64979 | 19.247538 |
| rs79148658  | G | A | 0.04695  | -0.0536291 | 0.0127515 | 2.60E-05 | 0.0002721 | 64979 | 17.687445 |
| rs792455    | C | T | 0.708073 | 0.0274068  | 0.0059142 | 3.60E-06 | 0.0003304 | 64979 | 21.473917 |
| rs8140858   | A | G | 0.110882 | -0.0353291 | 0.0085795 | 3.80E-05 | 0.0002609 | 64979 | 16.956212 |
| rs838133    | G | A | 0.553067 | 0.02628    | 0.0055713 | 2.40E-06 | 0.0003423 | 64979 | 22.249705 |
| rs843783    | G | T | 0.827483 | -0.0289874 | 0.0070883 | 4.30E-05 | 0.0002573 | 64979 | 16.72345  |
| rs859376    | G | A | 0.657266 | 0.0232379  | 0.0056964 | 4.50E-05 | 0.000256  | 64979 | 16.641117 |

### Fat

| SNP         | Effect allele | Other allele | EAF      | Beta       | SE        | P value  | R <sup>2</sup> | Sample size | F statistics |
|-------------|---------------|--------------|----------|------------|-----------|----------|----------------|-------------|--------------|
| rs11224098  | G             | A            | 0.14422  | -0.0370051 | 0.0076959 | 1.50E-06 | 0.0003557      | 64979       | 23.120407    |
| rs112795893 | A             | C            | 0.230929 | 0.0317009  | 0.0064259 | 8.10E-07 | 0.0003744      | 64979       | 24.336711    |
| rs11684464  | G             | A            | 0.40261  | 0.031388   | 0.0055364 | 1.40E-08 | 0.0004944      | 64979       | 32.14132     |
| rs11742543  | T             | C            | 0.050225 | 0.0578362  | 0.0123664 | 2.90E-06 | 0.0003365      | 64979       | 21.872557    |
| rs12134795  | T             | C            | 0.117828 | -0.0389059 | 0.0084265 | 3.90E-06 | 0.000328       | 64979       | 21.316955    |
| rs16824519  | A             | T            | 0.022462 | -0.0839489 | 0.0182403 | 4.20E-06 | 0.0003259      | 64979       | 21.181304    |
| rs17331192  | T             | C            | 0.020368 | 0.0927143  | 0.0195624 | 2.10E-06 | 0.0003456      | 64979       | 22.461348    |
| rs2267267   | A             | G            | 0.299243 | 0.0287261  | 0.0059721 | 1.50E-06 | 0.0003559      | 64979       | 23.135947    |
| rs4532636   | C             | A            | 0.557414 | 0.0251501  | 0.005501  | 4.80E-06 | 0.0003216      | 64979       | 20.902136    |
| rs4908119   | T             | C            | 0.22347  | -0.0312022 | 0.0065418 | 1.80E-06 | 0.00035        | 64979       | 22.74929     |
| rs57158572  | A             | G            | 0.059457 | 0.0561759  | 0.0116809 | 1.50E-06 | 0.0003558      | 64979       | 23.127788    |
| rs78242064  | A             | C            | 0.112708 | 0.0426735  | 0.0087626 | 1.10E-06 | 0.0003649      | 64979       | 23.71593     |
| rs80235298  | T             | A            | 0.012081 | 0.114763   | 0.0248169 | 3.80E-06 | 0.000329       | 64979       | 21.384316    |

### Polyunsaturated fat

| SNP         | Effect allele | Other allele | EAF      | Beta       | SE        | P value  | R <sup>2</sup> | Sample size | F statistics |
|-------------|---------------|--------------|----------|------------|-----------|----------|----------------|-------------|--------------|
| rs113031358 | T             | C            | 0.022323 | -0.0895179 | 0.0185058 | 1.30E-06 | 0.00036        | 64979       | 23.398643    |
| rs11684464  | G             | A            | 0.40261  | 0.0267395  | 0.0056151 | 1.90E-06 | 0.0003489      | 64979       | 22.677018    |
| rs12370646  | A             | G            | 0.075482 | 0.0489997  | 0.0106029 | 3.80E-06 | 0.0003286      | 64979       | 21.356208    |
| rs140172022 | G             | A            | 0.012696 | -0.14184   | 0.0288979 | 9.20E-07 | 0.0003706      | 64979       | 24.090816    |
| rs146520598 | A             | C            | 0.006073 | 0.168657   | 0.03688   | 4.80E-06 | 0.0003217      | 64979       | 20.912866    |
| rs1662190   | A             | G            | 0.060159 | 0.0548393  | 0.0117071 | 2.80E-06 | 0.0003376      | 64979       | 21.941776    |
| rs17552922  | G             | A            | 0.068653 | -0.0501052 | 0.0107864 | 3.40E-06 | 0.000332       | 64979       | 21.577404    |
| rs17618598  | C             | T            | 0.248528 | 0.0298784  | 0.0064307 | 3.40E-06 | 0.0003321      | 64979       | 21.586561    |
| rs2267267   | A             | G            | 0.299243 | 0.0291865  | 0.0060565 | 1.40E-06 | 0.0003573      | 64979       | 23.22256     |
| rs2910120   | C             | A            | 0.16113  | -0.0342366 | 0.0074553 | 4.40E-06 | 0.0003244      | 64979       | 21.088336    |
| rs62277909  | G             | A            | 0.015497 | -0.10424   | 0.0221824 | 2.60E-06 | 0.0003397      | 64979       | 22.081998    |
| rs73108193  | G             | T            | 0.036981 | -0.0666444 | 0.0144995 | 4.30E-06 | 0.000325       | 64979       | 21.125544    |
| rs76462814  | A             | G            | 0.014497 | 0.112625   | 0.0228765 | 8.50E-07 | 0.0003729      | 64979       | 24.236901    |
| rs77323243  | G             | C            | 0.032664 | 0.0724001  | 0.0156178 | 3.60E-06 | 0.0003306      | 64979       | 21.489448    |
| rs8102575   | T             | C            | 0.330532 | 0.0279016  | 0.0058958 | 2.20E-06 | 0.0003446      | 64979       | 22.395732    |
| rs9847186   | A             | G            | 0.425459 | -0.0259884 | 0.0055512 | 2.80E-06 | 0.0003372      | 64979       | 21.916381    |

### Saturated fat

| SNP         | Effect allele | Other allele | EAF      | Beta       | SE        | P value  | R <sup>2</sup> | Sample size | F statistics |
|-------------|---------------|--------------|----------|------------|-----------|----------|----------------|-------------|--------------|
| rs10214129  | G             | A            | 0.476443 | 0.0250119  | 0.0054098 | 3.80E-06 | 0.0003289      | 64979       | 21.375643    |
| rs11684464  | G             | A            | 0.40261  | 0.0312128  | 0.0055428 | 1.80E-08 | 0.0004878      | 64979       | 31.709584    |
| rs117852741 | G             | A            | 0.047577 | -0.058515  | 0.0126718 | 3.90E-06 | 0.0003281      | 64979       | 21.32281     |
| rs12134795  | T             | C            | 0.117828 | -0.0408083 | 0.0084367 | 1.30E-06 | 0.0003599      | 64979       | 23.395717    |
| rs12345632  | A             | G            | 0.015845 | 0.109648   | 0.0219542 | 5.90E-07 | 0.0003837      | 64979       | 24.943238    |
| rs17430818  | T             | C            | 0.230569 | 0.0297195  | 0.0064369 | 3.90E-06 | 0.000328       | 64979       | 21.316709    |
| rs4532636   | C             | A            | 0.557414 | 0.025177   | 0.0055073 | 4.80E-06 | 0.0003215      | 64979       | 20.898521    |
| rs57158572  | A             | G            | 0.059457 | 0.0566973  | 0.011695  | 1.20E-06 | 0.0003616      | 64979       | 23.502331    |
| rs7518006   | A             | G            | 0.873072 | 0.0387274  | 0.008155  | 2.00E-06 | 0.000347       | 64979       | 22.551774    |
| rs79972777  | G             | A            | 0.04678  | -0.0594494 | 0.0127719 | 3.20E-06 | 0.0003333      | 64979       | 21.665592    |
| rs9386538   | G             | A            | 0.306785 | -0.0273816 | 0.0059505 | 4.20E-06 | 0.0003258      | 64979       | 21.173872    |

### Carotene

| SNP         | Effect allele | Other allele | EAF      | Beta       | SE        | P value  | R <sup>2</sup> | Sample size | F statistics |
|-------------|---------------|--------------|----------|------------|-----------|----------|----------------|-------------|--------------|
| rs116995905 | T             | C            | 0.009812 | -0.132301  | 0.0288061 | 4.40E-06 | 0.0003245      | 64979       | 21.093272    |
| rs117731008 | A             | G            | 0.016818 | 0.0977133  | 0.0212277 | 4.20E-06 | 0.000326       | 64979       | 21.18791     |
| rs12126792  | G             | A            | 0.011509 | -0.134712  | 0.0280049 | 1.50E-06 | 0.000356       | 64979       | 23.138284    |
| rs13295574  | A             | G            | 0.303383 | -0.0276722 | 0.0059818 | 3.70E-06 | 0.0003292      | 64979       | 21.399682    |
| rs16898247  | A             | G            | 0.018968 | -0.107091  | 0.0200309 | 9.00E-08 | 0.0004397      | 64979       | 28.581937    |
| rs17800766  | C             | T            | 0.011673 | -0.121685  | 0.0254964 | 1.80E-06 | 0.0003504      | 64979       | 22.77734     |
| rs1936052   | T             | C            | 0.155936 | -0.0361185 | 0.0076683 | 2.50E-06 | 0.0003413      | 64979       | 22.184235    |
| rs366337    | G             | A            | 0.936764 | 0.0543804  | 0.0112221 | 1.30E-06 | 0.0003612      | 64979       | 23.481355    |
| rs3829931   | A             | T            | 0.973235 | 0.0830829  | 0.0177899 | 3.00E-06 | 0.0003356      | 64979       | 21.810364    |
| rs4771831   | A             | G            | 0.351886 | -0.0265212 | 0.0057621 | 4.20E-06 | 0.0003259      | 64979       | 21.184388    |
| rs5760695   | C             | T            | 0.086598 | 0.0468481  | 0.0100556 | 3.20E-06 | 0.0003339      | 64979       | 21.704742    |
| rs62417408  | G             | A            | 0.037772 | -0.0691153 | 0.0146553 | 2.40E-06 | 0.0003422      | 64979       | 22.240554    |
| rs6596473   | C             | G            | 0.299056 | 0.0276423  | 0.0059763 | 3.70E-06 | 0.0003291      | 64979       | 21.392998    |
| rs6660246   | C             | A            | 0.450266 | -0.0266889 | 0.0055307 | 1.40E-06 | 0.0003582      | 64979       | 23.28545     |
| rs77547747  | C             | T            | 0.056418 | -0.055803  | 0.0118339 | 2.40E-06 | 0.0003421      | 64979       | 22.235451    |

### Folate

| SNP         | Effect allele | Other allele | EAF      | Beta       | SE        | P value  | R <sup>2</sup> | Sample size | F statistics |
|-------------|---------------|--------------|----------|------------|-----------|----------|----------------|-------------|--------------|
| rs118164003 | T             | C            | 0.009484 | -0.140897  | 0.0280515 | 5.10E-07 | 0.0003881      | 64979       | 25.227717    |
| rs148031795 | T             | C            | 0.015003 | 0.104439   | 0.0223794 | 3.10E-06 | 0.0003351      | 64979       | 21.777858    |
| rs1502443   | G             | C            | 0.630046 | 0.0258943  | 0.0056353 | 4.30E-06 | 0.0003248      | 64979       | 21.113607    |
| rs16956822  | A             | G            | 0.02616  | -0.0792943 | 0.017182  | 3.90E-06 | 0.0003277      | 64979       | 21.297231    |
| rs2449166   | T             | C            | 0.471417 | 0.0252219  | 0.0054668 | 4.00E-06 | 0.0003275      | 64979       | 21.28503     |
| rs3772928   | C             | T            | 0.575413 | -0.0272574 | 0.0055274 | 8.20E-07 | 0.0003741      | 64979       | 24.317295    |
| rs57185514  | G             | A            | 0.008126 | -0.138679  | 0.0301895 | 4.40E-06 | 0.0003246      | 64979       | 21.100668    |
| rs7074988   | G             | A            | 0.063705 | -0.051278  | 0.0111147 | 4.00E-06 | 0.0003275      | 64979       | 21.284002    |
| rs76630415  | G             | T            | 0.212036 | -0.0373906 | 0.006703  | 2.40E-08 | 0.0004786      | 64979       | 31.114862    |
| rs76802001  | A             | G            | 0.036193 | -0.0677158 | 0.0147765 | 4.60E-06 | 0.0003231      | 64979       | 21.000204    |
| rs78074774  | T             | C            | 0.044671 | 0.0601471  | 0.0131667 | 4.90E-06 | 0.000321       | 64979       | 20.867102    |
| rs79748722  | T             | C            | 0.027963 | -0.0756746 | 0.0164864 | 4.40E-06 | 0.0003241      | 64979       | 21.068579    |
| rs79975477  | T             | C            | 0.030964 | 0.0731991  | 0.0156345 | 2.80E-06 | 0.0003372      | 64979       | 21.919474    |
| rs8085166   | G             | A            | 0.676915 | 0.0278138  | 0.0058117 | 1.70E-06 | 0.0003524      | 64979       | 22.903529    |

### Retinol

| SNP         | Effect allele | Other allele | EAF      | Beta       | SE        | P value  | R <sup>2</sup> | Sample size | F statistics |
|-------------|---------------|--------------|----------|------------|-----------|----------|----------------|-------------|--------------|
| rs117219913 | C             | T            | 0.07834  | 0.0476864  | 0.0103813 | 4.40E-06 | 0.0003349      | 62991       | 21.099482    |
| rs117669768 | A             | G            | 0.038236 | 0.0789545  | 0.0147682 | 9.00E-08 | 0.0004535      | 62991       | 28.581489    |
| rs149577802 | T             | C            | 0.015116 | -0.108795  | 0.0234115 | 3.40E-06 | 0.0003427      | 62991       | 21.594622    |
| rs2126371   | T             | C            | 0.317531 | -0.0289453 | 0.005977  | 1.30E-06 | 0.0003722      | 62991       | 23.452094    |
| rs3213829   | G             | T            | 0.546482 | 0.025976   | 0.0056098 | 3.60E-06 | 0.0003403      | 62991       | 21.440248    |
| rs692790    | C             | T            | 0.874331 | 0.0404149  | 0.0083821 | 1.40E-06 | 0.0003689      | 62991       | 23.246931    |
| rs74977546  | A             | G            | 0.052896 | -0.063514  | 0.0126784 | 5.50E-07 | 0.0003983      | 62991       | 25.095522    |

### Vitamin B6

| SNP         | Effect allele | Other allele | EAF      | Beta       | SE        | P value  | R <sup>2</sup> | Sample size | F statistics |
|-------------|---------------|--------------|----------|------------|-----------|----------|----------------|-------------|--------------|
| rs10138490  | C             | T            | 0.060543 | -0.0534963 | 0.0114138 | 2.80E-06 | 0.000338       | 64979       | 21.967145    |
| rs12198456  | T             | C            | 0.018652 | 0.0919531  | 0.0197234 | 3.10E-06 | 0.0003344      | 64979       | 21.734808    |
| rs12226112  | T             | G            | 0.341372 | 0.0283412  | 0.0057266 | 7.50E-07 | 0.0003768      | 64979       | 24.492376    |
| rs12412051  | C             | G            | 0.034366 | 0.0708635  | 0.0149768 | 2.20E-06 | 0.0003444      | 64979       | 22.38689     |
| rs141933624 | A             | G            | 0.021473 | -0.0897347 | 0.0192811 | 3.30E-06 | 0.0003332      | 64979       | 21.659272    |
| rs155599    | C             | T            | 0.705232 | 0.0342533  | 0.0059846 | 1.00E-08 | 0.0005039      | 64979       | 32.757961    |

|             |   |   |          |            |           |          |           |       |           |
|-------------|---|---|----------|------------|-----------|----------|-----------|-------|-----------|
| rs183178622 | T | C | 0.018261 | -0.0989483 | 0.0206841 | 1.70E-06 | 0.0003521 | 64979 | 22.8839   |
| rs188211816 | A | G | 0.029475 | -0.0786243 | 0.0162809 | 1.40E-06 | 0.0003588 | 64979 | 23.320798 |
| rs34938615  | G | A | 0.011377 | -0.122024  | 0.0264416 | 3.90E-06 | 0.0003276 | 64979 | 21.296179 |
| rs361294    | C | A | 0.691303 | -0.0273612 | 0.0059518 | 4.30E-06 | 0.0003251 | 64979 | 21.132885 |
| rs3745438   | C | T | 0.033702 | -0.071266  | 0.0155965 | 4.90E-06 | 0.0003212 | 64979 | 20.878395 |
| rs3772928   | C | T | 0.575413 | -0.0292449 | 0.0055341 | 1.30E-07 | 0.0004296 | 64979 | 27.925487 |
| rs67450584  | T | C | 0.158007 | 0.036705   | 0.0074573 | 8.60E-07 | 0.0003727 | 64979 | 24.225432 |
| rs7205927   | C | A | 0.411922 | -0.0257861 | 0.0055346 | 3.20E-06 | 0.000334  | 64979 | 21.706519 |
| rs74640671  | T | C | 0.010958 | -0.127176  | 0.02738   | 3.40E-06 | 0.0003319 | 64979 | 21.57397  |
| rs77806858  | C | T | 0.070369 | -0.0505124 | 0.0106104 | 1.90E-06 | 0.0003487 | 64979 | 22.66309  |
| rs9560457   | T | C | 0.40416  | 0.0255037  | 0.0055396 | 4.10E-06 | 0.0003261 | 64979 | 21.19483  |

### Vitamin B12

| SNP         | Effect allele | Other allele | EAF      | Beta       | SE        | P value  | R <sup>2</sup> | Sample size | F statistics |
|-------------|---------------|--------------|----------|------------|-----------|----------|----------------|-------------|--------------|
| rs10924919  | T             | C            | 0.394475 | -0.0286276 | 0.0056423 | 3.90E-07 | 0.000396       | 64979       | 25.742111    |
| rs112961770 | C             | G            | 0.023005 | -0.0888494 | 0.0184324 | 1.40E-06 | 0.0003575      | 64979       | 23.234421    |
| rs12776611  | A             | G            | 0.022116 | -0.0878135 | 0.0188958 | 3.40E-06 | 0.0003323      | 64979       | 21.596265    |
| rs1419875   | G             | T            | 0.200804 | -0.0315231 | 0.0068315 | 3.90E-06 | 0.0003276      | 64979       | 21.291735    |
| rs148901823 | G             | A            | 0.080711 | -0.0486291 | 0.0100516 | 1.30E-06 | 0.0003601      | 64979       | 23.405003    |
| rs193228340 | C             | T            | 0.007133 | 0.156303   | 0.0340106 | 4.30E-06 | 0.0003249      | 64979       | 21.11994     |
| rs388561    | C             | T            | 0.880654 | 0.040271   | 0.0085495 | 2.50E-06 | 0.0003413      | 64979       | 22.186822    |
| rs61994378  | C             | T            | 0.027799 | 0.0934555  | 0.0197741 | 2.30E-06 | 0.0003436      | 64979       | 22.335872    |
| rs67568068  | C             | T            | 0.212722 | -0.0317378 | 0.0066467 | 1.80E-06 | 0.0003508      | 64979       | 22.799578    |

### Vitamin C

| SNP         | Effect allele | Other allele | EAF      | Beta       | SE        | P value  | R <sup>2</sup> | Sample size | F statistics |
|-------------|---------------|--------------|----------|------------|-----------|----------|----------------|-------------|--------------|
| rs114598078 | T             | C            | 0.042309 | 0.0655782  | 0.0137636 | 1.90E-06 | 0.0003492      | 64979       | 22.700819    |
| rs11650824  | A             | T            | 0.035071 | 0.0794787  | 0.0158822 | 5.60E-07 | 0.0003852      | 64979       | 25.041874    |
| rs17482258  | T             | C            | 0.099073 | 0.042829   | 0.0092605 | 3.70E-06 | 0.0003291      | 64979       | 21.389386    |
| rs1883993   | A             | G            | 0.095419 | 0.044959   | 0.0093532 | 1.50E-06 | 0.0003555      | 64979       | 23.104457    |
| rs2018201   | G             | T            | 0.026551 | -0.0808079 | 0.0171646 | 2.50E-06 | 0.000341       | 64979       | 22.162916    |
| rs4238567   | C             | T            | 0.522046 | 0.0253068  | 0.0055081 | 4.30E-06 | 0.0003248      | 64979       | 21.108351    |
| rs4481190   | C             | A            | 0.351041 | -0.0306375 | 0.0057438 | 9.60E-08 | 0.0004377      | 64979       | 28.451109    |
| rs61868302  | T             | C            | 0.060676 | -0.0571013 | 0.0118391 | 1.40E-06 | 0.0003579      | 64979       | 23.261689    |
| rs74978963  | T             | C            | 0.008729 | 0.150814   | 0.0310213 | 1.20E-06 | 0.0003636      | 64979       | 23.634693    |
| rs7626478   | A             | G            | 0.720257 | 0.0279796  | 0.0061013 | 4.50E-06 | 0.0003235      | 64979       | 21.029027    |
| rs9540734   | A             | G            | 0.477524 | -0.0259285 | 0.0054847 | 2.30E-06 | 0.0003438      | 64979       | 22.347927    |

### Vitamin D

| SNP         | Effect allele | Other allele | EAF      | Beta       | SE        | P value  | R <sup>2</sup> | Sample size | F statistics |
|-------------|---------------|--------------|----------|------------|-----------|----------|----------------|-------------|--------------|
| rs10469075  | T             | C            | 0.189076 | -0.0324603 | 0.0070126 | 3.70E-06 | 0.0003296      | 64979       | 21.425872    |
| rs117693112 | A             | G            | 0.04134  | 0.0682431  | 0.0144786 | 2.40E-06 | 0.0003418      | 64979       | 22.215239    |
| rs17301981  | C             | T            | 0.088198 | -0.0437855 | 0.0095847 | 4.90E-06 | 0.0003211      | 64979       | 20.868277    |
| rs2399949   | C             | T            | 0.184585 | -0.034239  | 0.0070597 | 1.20E-06 | 0.0003619      | 64979       | 23.521294    |
| rs35775421  | A             | G            | 0.053231 | -0.0559707 | 0.0122186 | 4.60E-06 | 0.0003228      | 64979       | 20.982886    |
| rs4395237   | G             | T            | 0.049626 | -0.0601061 | 0.0127619 | 2.50E-06 | 0.0003413      | 64979       | 22.18161     |
| rs57038272  | T             | C            | 0.176978 | 0.0333323  | 0.007237  | 4.10E-06 | 0.0003264      | 64979       | 21.213193    |
| rs61942184  | C             | G            | 0.027543 | 0.0822174  | 0.0177573 | 3.70E-06 | 0.0003298      | 64979       | 21.436814    |
| rs679830    | C             | T            | 0.948622 | -0.0601819 | 0.012755  | 2.40E-06 | 0.0003425      | 64979       | 22.261657    |
| rs74593039  | C             | G            | 0.157655 | 0.0350049  | 0.0075392 | 3.40E-06 | 0.0003317      | 64979       | 21.557328    |
| rs75713989  | T             | C            | 0.129857 | 0.039147   | 0.0081668 | 1.60E-06 | 0.0003535      | 64979       | 22.976451    |
| rs80261862  | T             | C            | 0.097814 | -0.0448741 | 0.0092671 | 1.30E-06 | 0.0003607      | 64979       | 23.447271    |

### Vitamin E

| SNP         | Effect allele | Other allele | EAF      | Beta       | SE        | P value  | R <sup>2</sup> | Sample size | F statistics |
|-------------|---------------|--------------|----------|------------|-----------|----------|----------------|-------------|--------------|
| rs111306778 | A             | G            | 0.089621 | -0.0479658 | 0.0095723 | 5.40E-07 | 0.0003863      | 64979       | 25.108464    |
| rs12165526  | A             | T            | 0.100636 | 0.0479017  | 0.0091778 | 1.80E-07 | 0.0004191      | 64979       | 27.24056     |
| rs12421920  | G             | A            | 0.093546 | -0.0434479 | 0.009385  | 3.70E-06 | 0.0003297      | 64979       | 21.431835    |
| rs12899673  | A             | G            | 0.333079 | 0.0268951  | 0.005818  | 3.80E-06 | 0.0003288      | 64979       | 21.368845    |
| rs2723979   | G             | T            | 0.583758 | -0.0266142 | 0.0055275 | 1.50E-06 | 0.0003567      | 64979       | 23.18269     |
| rs35218694  | G             | A            | 0.034459 | -0.0741637 | 0.0153104 | 1.30E-06 | 0.000361       | 64979       | 23.463691    |
| rs4903544   | T             | C            | 0.30035  | -0.0295098 | 0.0060211 | 9.50E-07 | 0.0003695      | 64979       | 24.019695    |
| rs536912    | A             | C            | 0.736049 | 0.0304596  | 0.0062009 | 9.00E-07 | 0.0003712      | 64979       | 24.128158    |
| rs6033      | G             | A            | 0.072493 | -0.0516563 | 0.0105563 | 9.90E-07 | 0.0003684      | 64979       | 23.944721    |
| rs71385328  | G             | A            | 0.011307 | 0.130015   | 0.0262064 | 7.00E-07 | 0.0003786      | 64979       | 24.612675    |
| rs79966958  | T             | C            | 0.012689 | -0.116527  | 0.024505  | 2.00E-06 | 0.0003479      | 64979       | 22.611551    |
| rs979218    | C             | A            | 0.098036 | -0.0430325 | 0.0092226 | 3.10E-06 | 0.0003349      | 64979       | 21.77078     |

### Calcium

| SNP         | Effect allele | Other allele | EAF      | Beta       | SE        | P value  | R <sup>2</sup> | Sample size | F statistics |
|-------------|---------------|--------------|----------|------------|-----------|----------|----------------|-------------|--------------|
| rs11030416  | A             | G            | 0.041915 | -0.0654539 | 0.0136013 | 1.50E-06 | 0.0003563      | 64979       | 23.157776    |
| rs11088797  | A             | G            | 0.114469 | 0.03961    | 0.0084904 | 3.10E-06 | 0.0003348      | 64979       | 21.763911    |
| rs117456360 | A             | G            | 0.042875 | 0.0626521  | 0.0136422 | 4.40E-06 | 0.0003245      | 64979       | 21.090607    |
| rs1219820   | T             | C            | 0.029471 | -0.076443  | 0.015952  | 1.70E-06 | 0.0003533      | 64979       | 22.963168    |
| rs12618785  | G             | C            | 0.399008 | 0.0272715  | 0.0056145 | 1.20E-06 | 0.000363       | 64979       | 23.59288     |
| rs1714800   | C             | G            | 0.662121 | 0.0279524  | 0.0057215 | 1.00E-06 | 0.0003672      | 64979       | 23.867145    |
| rs1974821   | A             | G            | 0.152218 | 0.0356787  | 0.0075459 | 2.30E-06 | 0.0003439      | 64979       | 22.355585    |
| rs2443773   | G             | T            | 0.506088 | 0.0272002  | 0.0054165 | 5.10E-07 | 0.0003879      | 64979       | 25.217461    |
| rs35683760  | G             | A            | 0.228625 | -0.0310253 | 0.0064484 | 1.50E-06 | 0.0003561      | 64979       | 23.148351    |
| rs39308     | A             | G            | 0.265051 | 0.0297088  | 0.0061719 | 1.50E-06 | 0.0003565      | 64979       | 23.169329    |
| rs4535437   | G             | A            | 0.245133 | 0.0316699  | 0.0062736 | 4.50E-07 | 0.000392       | 64979       | 25.482836    |
| rs4988235   | A             | G            | 0.723274 | 0.032361   | 0.006013  | 7.40E-08 | 0.0004455      | 64979       | 28.963014    |
| rs62347998  | T             | C            | 0.042331 | 0.0641566  | 0.0138097 | 3.40E-06 | 0.000332       | 64979       | 21.582454    |
| rs73238581  | A             | C            | 0.347402 | -0.0271448 | 0.0057047 | 2.00E-06 | 0.0003483      | 64979       | 22.641091    |
| rs7464794   | C             | T            | 0.499376 | -0.0264599 | 0.0053917 | 9.20E-07 | 0.0003705      | 64979       | 24.083056    |
| rs753899    | C             | T            | 0.09229  | 0.0462859  | 0.0093494 | 7.40E-07 | 0.000377       | 64979       | 24.508282    |
| rs8067154   | A             | G            | 0.21908  | -0.0300856 | 0.0065656 | 4.60E-06 | 0.000323       | 64979       | 20.99677     |
| rs8109178   | T             | A            | 0.121426 | 0.0389694  | 0.0083427 | 3.00E-06 | 0.0003357      | 64979       | 21.8184      |

### Iron

| SNP         | Effect allele | Other allele | EAF      | Beta       | SE        | P value  | R <sup>2</sup> | Sample size | F statistics |
|-------------|---------------|--------------|----------|------------|-----------|----------|----------------|-------------|--------------|
| rs150479966 | C             | G            | 0.007717 | 0.170181   | 0.0336231 | 4.20E-07 | 0.0003941      | 64979       | 25.617295    |
| rs155599    | C             | T            | 0.705232 | 0.0302901  | 0.0059408 | 3.40E-07 | 0.0003999      | 64979       | 25.995763    |
| rs799443    | A             | T            | 0.669263 | -0.0300914 | 0.0057369 | 1.60E-07 | 0.0004232      | 64979       | 27.511952    |

### Magnesium

| SNP         | Effect allele | Other allele | EAF      | Beta      | SE        | P value  | R <sup>2</sup> | Sample size | F statistics |
|-------------|---------------|--------------|----------|-----------|-----------|----------|----------------|-------------|--------------|
| rs114575778 | A             | G            | 0.010278 | -0.145164 | 0.0274331 | 1.20E-07 | 0.0004307      | 64979       | 27.999786    |
| rs146963873 | A             | T            | 0.007919 | -0.16778  | 0.0329752 | 3.60E-07 | 0.0003983      | 64979       | 25.887621    |
| rs573905    | G             | A            | 0.547365 | 0.0275402 | 0.0053899 | 3.20E-07 | 0.0004016      | 64979       | 26.106952    |
| rs77126457  | A             | G            | 0.01442  | 0.114984  | 0.0227843 | 4.50E-07 | 0.0003918      | 64979       | 25.467721    |

### Potassium

| SNP         | Effect allele | Other allele | EAF      | Beta       | SE        | P value  | R <sup>2</sup> | Sample size | F statistics |
|-------------|---------------|--------------|----------|------------|-----------|----------|----------------|-------------|--------------|
| rs10764330  | G             | A            | 0.699138 | 0.0278001  | 0.0059182 | 2.60E-06 | 0.0003395      | 64979       | 22.064729    |
| rs114300683 | A             | G            | 0.011896 | -0.114807  | 0.0248968 | 4.00E-06 | 0.0003271      | 64979       | 21.263576    |
| rs12296227  | T             | G            | 0.267093 | 0.0284413  | 0.0061509 | 3.80E-06 | 0.0003289      | 64979       | 21.379954    |
| rs12412051  | C             | G            | 0.034366 | 0.072528   | 0.0149208 | 1.20E-06 | 0.0003635      | 64979       | 23.627285    |
| rs145857065 | C             | T            | 0.029938 | -0.0828746 | 0.0172848 | 1.60E-06 | 0.0003537      | 64979       | 22.98798     |
| rs146963873 | A             | T            | 0.007919 | -0.153494  | 0.0332741 | 4.00E-06 | 0.0003274      | 64979       | 21.279274    |
| rs148244439 | T             | C            | 0.05238  | 0.0566213  | 0.0122646 | 3.90E-06 | 0.0003279      | 64979       | 21.312752    |
| rs2745938   | T             | G            | 0.647485 | 0.0261087  | 0.0056697 | 4.10E-06 | 0.0003262      | 64979       | 21.205086    |
| rs35579431  | T             | C            | 0.265517 | 0.0291435  | 0.006126  | 2.00E-06 | 0.0003482      | 64979       | 22.632011    |
| rs361294    | C             | A            | 0.691303 | -0.0282084 | 0.0059297 | 2.00E-06 | 0.0003481      | 64979       | 22.629358    |
| rs3772928   | C             | T            | 0.575413 | -0.0265481 | 0.0055135 | 1.50E-06 | 0.0003567      | 64979       | 23.184219    |
| rs7040926   | C             | T            | 0.065112 | -0.0510548 | 0.0111197 | 4.40E-06 | 0.0003243      | 64979       | 21.080148    |
| rs7479680   | C             | A            | 0.144251 | -0.0380825 | 0.0077532 | 9.00E-07 | 0.0003712      | 64979       | 24.125644    |
| rs77126457  | A             | G            | 0.01442  | 0.105123   | 0.0229918 | 4.80E-06 | 0.0003216      | 64979       | 20.904326    |
| rs77824658  | G             | A            | 0.089995 | 0.0438189  | 0.0095441 | 4.40E-06 | 0.0003243      | 64979       | 21.078319    |

SNP, single nucleotide polymorphism; EAF, effect allele frequency; SE, standard error.

**Table S9. MR estimates of associations between 19 daily nutrient intakes and prostate cancer risk**

| Exposures             | MR methods      | OR (95%CI)          | P value |
|-----------------------|-----------------|---------------------|---------|
| Energy                | MR Egger        | 0.341(0.134, 0.868) | 0.153   |
|                       | Weighted median | 1.176(0.788, 1.755) | 0.428   |
|                       | IVW             | 1.133(0.675, 1.904) | 0.636   |
| Carbohydrate          | MR Egger        | 0.803(0.542, 1.187) | 0.287   |
|                       | Weighted median | 1.042(0.838, 1.296) | 0.710   |
|                       | IVW             | 1.032(0.886, 1.203) | 0.685   |
| Englyst dietary fibre | MR Egger        | 1.873(0.480, 7.310) | 0.462   |
|                       | Weighted median | 0.991(0.697, 1.409) | 0.958   |
|                       | IVW             | 0.960(0.722, 1.277) | 0.781   |
| Protein               | MR Egger        | 0.819(0.632, 1.063) | 0.138   |
|                       | Weighted median | 0.969(0.852, 1.101) | 0.627   |
|                       | IVW             | 1.000(0.894, 1.118) | 0.995   |
| Fat                   | MR Egger        | 1.050(0.600, 1.836) | 0.868   |
|                       | Weighted median | 0.978(0.758, 1.263) | 0.866   |
|                       | IVW             | 0.976(0.813, 1.171) | 0.794   |
| Polyunsaturated fat   | MR Egger        | 1.007(0.637, 1.590) | 0.978   |
|                       | Weighted median | 1.014(0.796, 1.293) | 0.908   |
|                       | IVW             | 0.900(0.731, 1.110) | 0.325   |
| Saturated fat         | MR Egger        | 1.142(0.486, 2.686) | 0.767   |
|                       | Weighted median | 0.999(0.757, 1.319) | 0.996   |
|                       | IVW             | 0.852(0.654, 1.110) | 0.236   |
| Carotene              | MR Egger        | 1.013(0.725, 1.415) | 0.943   |
|                       | Weighted median | 1.112(0.888, 1.393) | 0.355   |
|                       | IVW             | 1.083(0.917, 1.279) | 0.349   |
| Folate                | MR Egger        | 0.810(0.519, 1.263) | 0.371   |
|                       | Weighted median | 0.975(0.762, 1.248) | 0.841   |
|                       | IVW             | 0.975(0.783, 1.215) | 0.823   |
| Retinol               | MR Egger        | 1.056(0.597, 1.868) | 0.858   |
|                       | Weighted median | 0.947(0.701, 1.279) | 0.723   |
|                       | IVW             | 0.925(0.731, 1.170) | 0.515   |
| Vitamin B6            | MR Egger        | 1.106(0.674, 1.816) | 0.695   |
|                       | Weighted median | 0.913(0.718, 1.160) | 0.456   |
|                       | IVW             | 0.998(0.806, 1.234) | 0.982   |
| Vitamin B12           | MR Egger        | 0.884(0.514, 1.521) | 0.670   |
|                       | Weighted median | 1.100(0.820, 1.475) | 0.524   |
|                       | IVW             | 1.080(0.855, 1.364) | 0.520   |
| Vitamin C             | MR Egger        | 0.653(0.416, 1.024) | 0.096   |
|                       | Weighted median | 1.200(0.920, 1.566) | 0.179   |
|                       | IVW             | 0.992(0.792, 1.243) | 0.947   |
| Vitamin D             | MR Egger        | 0.985(0.477, 2.034) | 0.968   |
|                       | Weighted median | 0.954(0.735, 1.238) | 0.723   |
|                       | IVW             | 0.965(0.798, 1.168) | 0.715   |
| Vitamin E             | MR Egger        | 0.833(0.551, 1.258) | 0.405   |
|                       | Weighted median | 0.970(0.767, 1.226) | 0.796   |
|                       | IVW             | 0.980(0.822, 1.168) | 0.822   |
| Calcium               | MR Egger        | 0.988(0.512, 1.908) | 0.972   |
|                       | Weighted median | 1.016(0.816, 1.265) | 0.886   |
|                       | IVW             | 1.049(0.888, 1.240) | 0.573   |
| Iron                  | MR Egger        | 0.930(0.461, 1.877) | 0.873   |
|                       | Weighted median | 1.298(0.853, 1.975) | 0.223   |
|                       | IVW             | 1.219(0.867, 1.714) | 0.255   |
| Magnesium             | MR Egger        | 1.170(0.710, 1.931) | 0.601   |
|                       | Weighted median | 0.904(0.591, 1.384) | 0.643   |
|                       | IVW             | 0.787(0.525, 1.181) | 0.248   |
| Potassium             | MR Egger        | 0.858(0.530, 1.391) | 0.546   |
|                       | Weighted median | 1.044(0.801, 1.361) | 0.751   |
|                       | IVW             | 1.077(0.887, 1.307) | 0.455   |

OR, odds ratio; CI, confidence interval; IVW, inverse variance weighted.

**Table S10. Sensitivity analysis of the causal links between 19 daily nutrient intakes and prostate cancer risk**

| Exposures             | MR-Egger intercept test |         | Cochran Q test |                        |
|-----------------------|-------------------------|---------|----------------|------------------------|
|                       | Egger intercept         | P value | Q              | P value                |
| Energy                | 0.056                   | 0.115   | 7.658          | 0.054                  |
| Carbohydrate          | 0.010                   | 0.190   | 15.763         | 0.541                  |
| Englyst dietary fibre | -0.025                  | 0.429   | 1.817          | 0.611                  |
| Protein               | 0.008                   | 0.103   | 114.699        | 4.582*10 <sup>-4</sup> |
| Fat                   | -0.003                  | 0.792   | 11.688         | 0.471                  |
| Polyunsaturated fat   | -0.005                  | 0.598   | 24.093         | 0.064                  |
| Saturated fat         | -0.010                  | 0.497   | 17.097         | 0.072                  |
| Carotene              | 0.003                   | 0.658   | 9.019          | 0.830                  |
| Folate                | 0.009                   | 0.364   | 21.408         | 0.065                  |
| Retinol               | -0.006                  | 0.637   | 2.503          | 0.868                  |
| Vitamin B6            | -0.005                  | 0.655   | 29.576         | 0.020                  |
| Vitamin B12           | 0.009                   | 0.448   | 9.716          | 0.286                  |
| Vitamin C             | 0.018                   | 0.073   | 14.553         | 0.149                  |
| Vitamin D             | -0.001                  | 0.956   | 9.815          | 0.547                  |
| Vitamin E             | 0.007                   | 0.413   | 7.648          | 0.744                  |
| Calcium               | 0.002                   | 0.856   | 21.005         | 0.226                  |
| Iron                  | 0.012                   | 0.547   | 0.751          | 0.687                  |
| Magnesium             | -0.025                  | 0.179   | 4.711          | 0.194                  |
| Potassium             | 0.009                   | 0.333   | 17.041         | 0.254                  |
