# Supplementary material for: Relationships of dietary habits with prostate cancer risk: results from Mendelian randomization analyses and the National Health and Nutrition Examination Survey
Source: Royal Society of Chemistry journal article supplement (doi:10.1039/d4fo03859b), 2024-01-01
Supplement: d4fo03859b3.pdf [file d4fo03859b3.pdf]

**Figure S1. Flow chart of the study population for analyzing daily nutrient intakes and prostate cancer risk.** NHANES, National Health and Nutrition Examination Survey.

**Figure S2. The process of excluding SNPs that affect the reliability of the results according to the result of leave-one-out sensitivity analysis of MR.** SNPs, single nucleotide polymorphisms; MR, Mendelian randomization.

**Figure S3. Forest plot of the individual and combined effect of the 18 dietary habits on prostate cancer risk.**

**Figure S4. Scatter plots from genetically predicted effects assessed the 18 dietary habits on prostate cancer.** The slopes of each line with different color indicate the causal relationship between dietary habits and prostate cancer risk for each method.

**Figure S5. Leave-one-out sensitivity analysis of MR estimate assessed 18 dietary habits on prostate cancer.** MR, Mendelian randomization.

**Figure S6. Funnel plot of MR estimate assessed 18 dietary habits on prostate cancer.** MR, Mendelian randomization.

**Figure S7. Forest plot of the individual and combined effect of the 19 daily nutrient intakes on prostate cancer risk.**

**Figure S8. Scatter plots from genetically predicted effects assessed the 19 daily nutrient intakes on prostate cancer.** The slopes of each line with different color indicate the causal relationship between daily nutrient intakes and prostate cancer risk for each method.

**Figure S9. Leave-one-out sensitivity analysis of MR estimate assessed 19 daily nutrient intakes on prostate cancer.** MR, Mendelian randomization.

**Figure S10. Funnel plot of MR estimate assessed 19 daily nutrient intakes on prostate cancer.** MR, Mendelian randomization.
