# Supplementary material for: Relationships of dietary habits with prostate cancer risk: results from Mendelian randomization analyses and the National Health and Nutrition Examination Survey
Source: Royal Society of Chemistry journal article supplement (doi:10.1039/d4fo03859b), 2024-01-01
Supplement: d4fo03859b4.xlsx [file d4fo03859b4.xlsx]

## Sheet: Sheet1
Table S11. Detail data about daily nutrient intake and prostate cancer presence of study participants.
Participant ID	Prostate cancer history	Energy (kcal/day)	Carbohydrate (gm/day)	Dietary fiber (gm/day)	Protein (gm/day)	Fat (gm/day)	Saturated fatty acids (gm/day)	Monounsaturated fatty acids (gm/day)	Polyunsaturated fatty acids (gm/day)	Vitamin E (mg/day)	Retinol (mcg/day)	Vitamin A (mcg/day)	α-carotene (mcg/day)	β-carotene (mcg/day)	β-cryptoxanthin (mcg/day)	Vitamin B1 (mg/day)	Vitamin B2 (mg/day)	Vitamin B6 (mg/day)	Folate (mcg/day)	Vitamin B12 (mcg/day)	Vitamin C (mg/day)	Vitamin D (mcg/day)	Vitamin K (mcg/day)	Calcium (mg/day)	Phosphorus (mg/day)	Magnesium (mg/day)	Iron (mg/day)	Zinc (mg/day)	Copper (mg/day)	Sodium (mg/day)	Potassium (mg/day)	Selenium (mcg/day)
51633	NO	1565	189.65	17.5	88.37	45.7	15.891	17.491	9.245	6.85	753	1243	1414	5169	21	2.005	4.27	1.719	300	6.26	128.7	15	61.8	1818	1894	353	7.1	10.22	0.844	2530	4308	94.7
51635	NO	1479	156.27	13.5	72.96	62.17	23.311	25.183	8.732	6.12	323	573	674	2657	43	1.139	1.906	1.251	258	3.42	69	3	87.7	905	1084	223	10.73	9.84	1.156	3485	2324	103.6
51645	NO	2670	211.73	7.4	139.53	70.08	25.461	26.57	10.49	4.29	91	116	31	281	0	1.296	2.069	3.001	447	10.09	12.1	2.3	41.2	817	1725	348	17.41	26.77	1.013	3572	3494	161.8
51653	NO	2865	247.32	7.3	86.19	71.07	23.536	27.411	13.272	4.21	353	427	49	869	24	1.665	1.836	1.486	362	5.66	44	5.1	35.3	979	1605	213	12.32	12.82	1.121	3397	1870	124.6
51654	NO	3481	593.49	49.3	109.13	85.73	23.812	31.435	24.368	12.74	737	853	158	1281	63	2.736	3.058	3.952	907	5.75	117.3	4.7	69.4	1308	2197	773	48.49	14.58	2.984	6783	4693	140.4
51656	NO	2320	225.37	18.2	89.38	87.58	30.121	30.226	19.231	8.99	382	503	63	1404	3	1.371	2.615	1.826	366	6.61	55.3	3	127.1	1050	1634	337	12.42	11.92	1.126	3997	3682	110.2
51657	NO	1455	129.42	9.1	63.17	23.91	9.57	9.571	2.204	1.34	59	61	0	42	0	1.641	1.585	1.74	444	3.03	5	0.6	6.8	511	1089	268	7.63	7.42	1.077	2299	1955	102.6
51667	NO	1428	192.57	29.9	76.62	42.45	17.539	14.74	5.378	5.37	298	510	93	2301	383	0.991	2.123	1.663	331	4.4	178.1	5.3	98.5	848	1180	287	13.29	11.34	1.052	2993	3471	84.8
51678	NO	2754	281.89	25.5	107.74	137.32	31.766	45.683	46.703	13.98	510	1244	2348	7533	176	3.792	2.715	3.79	653	10.36	92.8	6.2	201.7	636	1457	361	33.88	17.28	1.807	4942	5017	116.3
51687	NO	1306	194.4	19.6	44.47	44.83	9.756	14.287	17.286	6.62	350	378	44	322	42	1.003	1.779	2.715	463	5.59	157.4	2.4	62.2	521	835	282	10.76	8.21	1.111	1188	2527	47.3
51692	NO	2517	224.3	10	109.84	99.08	45.152	32.192	12.541	5.73	750	786	39	440	10	2.143	3.261	2.129	380	8.44	35	11.1	32.1	2094	1980	396	15.14	15.93	1.303	2658	3061	108.7
51702	NO	1764	266.45	8.3	114.43	28.82	6.59	8.45	9.494	5.08	0	26	29	217	174	1.729	2.044	2.895	220	5.99	19.8	0	35.7	286	1181	213	18.64	14.14	1.114	3506	2360	76.5
51704	NO	3419	418.12	60	103.18	99.66	22.829	44.588	21.871	12.57	114	299	420	1840	367	2.211	1.419	2.215	1187	1.83	252.3	0.7	115.4	1339	1742	502	24.78	12.77	2.647	3748	4796	150.9
51709	NO	1448	212.04	14.5	62.28	40.35	13.979	15.487	8.002	3.32	479	495	3	195	14	0.747	1.694	1.109	232	4.2	24.7	7.4	14.3	1161	1440	275	10.78	9.6	0.966	1979	1737	80
51713	NO	1951	149.2	12.6	109.43	101.79	26.084	43.621	23.388	11.13	339	446	164	1203	16	1.264	2.903	1.757	286	7.77	44.6	5.1	62.1	715	1825	311	11.62	12.85	1.403	5310	3917	163.2
51714	NO	3563	364.97	20.7	109.64	100.28	33.768	30.962	26.175	10.67	460	581	139	1302	170	1.964	1.866	2.21	508	5.8	226.1	17.4	138.7	1884	2310	394	15.75	7.72	1.665	5777	4345	188.8
51715	NO	3578	538.8	21.8	104.61	109.04	26.383	34.686	37.533	8.02	103	225	195	1360	26	3.091	1.902	2.309	515	3.54	404.8	2.4	49.4	726	1695	508	21.78	13.76	2.228	5003	4668	164.8
51737	NO	6975	935.91	39.3	155.77	301.15	145.814	84.968	49.079	11.14	2216	2287	35	721	40	2.695	6.203	2.601	493	11.62	115.7	16.1	116	4053	4176	862	20.51	26.13	2.492	5938	6986	162.3
51749	NO	966	136.73	2.7	40.34	28.08	12.006	9.724	3.408	4.01	522	528	2	70	0	1.023	1.535	1.267	278	6.55	119	4.5	12.4	380	541	143	15.84	8.5	0.537	1295	1569	36.5
51759	NO	3115	316.44	24.5	144.23	141	41.088	61.658	27.005	9.64	207	227	52	212	24	2.282	3.299	2.828	397	4.89	72.4	4.5	96.9	623	2138	419	18.92	21.1	1.726	5318	4777	177.5
51778	NO	2969	352.47	31.7	140.35	117.49	42.132	45.249	23.769	10.79	948	1001	84	638	29	2.961	4.39	2.042	549	8.96	81.4	20.8	46.2	2511	2925	604	15.99	17.91	1.849	3468	5342	174.5
51783	NO	2417	288.08	38.4	88.67	105.91	20.198	47.183	33.333	13.73	314	314	0	0	18	1.924	1.38	1.305	760	1.48	17.6	4	54.8	848	1671	427	20.97	9.54	1.849	4331	2668	147.5
51784	NO	3124	317.03	46.1	134.02	93.67	23.905	34.811	23.608	7.64	211	318	230	1129	12	1.86	1.701	3.201	777	2.17	96.8	2.3	140.5	1186	2336	755	17.9	14.17	2.194	3418	4406	142.1
51798	NO	1926	260.19	19.5	48.25	82.31	19.311	21.158	34.191	16.12	845	1455	77	7239	63	1.933	2.607	2.846	749	6.18	144.1	3.3	658.4	758	973	374	27.36	8.38	1.19	2874	3136	76.1
51799	NO	2692	345.29	31.3	103.87	101.49	26.107	29.305	36.388	22.42	324	562	771	2415	134	1.807	1.381	1.904	628	3.2	56.7	3.2	85.8	1048	2154	433	16.73	12.81	2.129	5383	2490	186.9
51803	NO	2228	113.64	5	78.02	76.56	26.356	31.969	11.997	2.44	255	273	118	157	22	0.814	1.953	1.5	131	2.47	3.5	2.3	51.5	338	1001	182	7.82	8.22	0.435	2975	2371	99
51804	NO	1843	270.73	12.7	70.63	55.13	13.791	20.981	13.284	11.77	1023	2383	751	15897	131	2.345	3.102	3.273	493	10.39	181.2	8.5	70.1	1085	1289	323	27.03	16.06	1.504	2711	3030	76
51806	NO	1474	246.72	32.6	51.9	35.05	7.296	14.821	9.24	6.71	0	42	23	494	11	1.179	1.031	1.289	685	1.63	18.4	0.1	43.4	317	924	316	14.71	8.48	1.402	2074	3625	42.1
51807	NO	1186	126.68	6.8	60.96	47.12	18.974	14.563	6.178	4.27	300	343	0	487	1	1.124	1.894	0.816	223	4.85	2.9	8.7	25.9	1405	982	254	8.26	9.02	0.876	1929	1938	105.4
51818	NO	3881	470.48	43.3	158.38	158.1	69.552	52.926	19.695	8.89	797	881	49	906	234	2.215	2.017	2.648	414	7.74	126.6	5.4	52.2	1482	3042	638	21.82	26.41	4.172	5153	3373	300.8
51819	NO	2183	245.86	11.2	98.49	91.44	36.924	34.833	12.758	9.01	1455	1628	13	1854	511	1.682	3.663	1.863	441	9.69	107.7	19.4	180.6	1981	1880	298	18.24	10.87	0.957	2292	3410	149.6
51836	NO	2705	362.49	26.4	105.14	83.76	27.415	34.177	16.062	5.7	114	218	248	1094	35	2.336	1.564	1.867	768	2.69	79.2	1.5	60.5	1063	1696	337	21.01	13.75	1.478	5196	3562	141.8
51846	NO	2699	224.76	19.4	98.17	89.14	21.641	40.2	17.798	7.59	26	45	62	195	29	1.315	2.06	4.259	376	5.52	74.9	1.2	73.2	401	1448	447	10.72	18.33	1.685	3749	4807	126.3
51848	NO	2217	301.48	15.3	95.88	70.9	25.844	26.812	11.074	5.18	176	215	43	441	9	1.636	1.367	2.022	338	7.65	36.6	16.5	30	965	1698	263	13.21	11.5	0.936	3602	2356	139
51854	NO	2104	251.71	25.4	52.73	66.94	20.397	24.462	16.819	7.88	372	405	11	381	53	1.024	1.544	1.582	501	2.71	64.7	4.9	43	636	1101	312	10.59	5.42	1.075	2736	2680	77.2
51855	NO	826	90.29	6	28.62	40.81	18.878	13.528	4.829	3.82	0	410	0	4924	0	0.15	0.356	0.546	148	2.33	29.5	0.2	403.4	221	295	89	3.81	6.21	0.586	905	746	21.6
51861	NO	1400	131.68	6.8	56.28	73.95	29.747	28.967	10.134	3.04	327	596	25	3212	9	0.818	1.159	0.658	173	2.46	60.8	7	19.8	815	1098	133	7.93	6.04	0.704	2541	1494	84.4
51866	NO	2220	231.91	25.1	92.15	95.53	21.267	38.409	28.462	8	72	710	74	7595	26	2.437	2.176	1.481	466	13.43	46	8.3	83.7	639	1653	291	18.43	7.33	1.456	3801	3390	106.5
51877	NO	3945	606.54	29	135.12	110.46	36.831	46.24	15.026	7.19	558	634	166	801	88	3.387	1.998	3.691	857	3.91	190.5	1.1	63.1	950	2080	453	29.62	15.12	1.753	6008	3605	175.9
51878	NO	1712	225.32	19.6	94.84	49.62	14.839	20.717	9.709	6.09	1415	1534	256	1279	19	2.654	3.704	3.767	788	6.75	88.7	3.4	23	973	1565	422	35.02	23.88	1.648	2649	3343	131.8
51880	NO	2455	313.15	37.5	92.22	95.1	33.044	29.836	23.554	6.86	516	680	211	1806	101	1.571	1.635	2.546	538	5.91	162.7	6.1	64.9	1149	1932	455	26.3	14.05	1.48	4144	3972	97.5
51885	NO	1834	211.05	10.4	95.78	66.57	24.756	24.642	11.567	3.43	95	142	21	566	3	2.828	1.335	1.964	336	3.25	148	3.3	123.3	766	1293	245	12.45	12.58	1.377	5512	2157	137.1
51888	NO	2783	377.53	24.6	81.32	108.48	53.286	34.656	7.075	4.79	956	1057	112	1087	151	2.146	3.285	2.989	716	7.22	218.3	5.1	67.9	1453	1614	372	18.05	17.29	1.196	4621	4384	87.1
51889	YES	2847	267.25	19.5	85.07	108.94	36.272	42.721	20.362	7.84	378	410	4	384	14	1.478	1.611	1.462	302	3.6	19.8	5.1	37.4	833	1446	233	15.23	16.56	1.315	4880	2598	116.7
51892	NO	2181	320.4	35.6	68.11	52.28	23.243	14.215	10.116	4.91	328	550	938	2181	50	2.651	1.846	1.189	682	1.35	7.3	2.1	29.8	501	1273	362	21.06	9.34	1.588	2910	1900	181.3
51906	NO	2373	253.22	5.9	84.73	113.67	34.725	44.765	23.608	6.39	274	304	43	333	6	1.221	1.643	1.173	241	5.6	8.4	1.1	56.5	712	1170	160	14.79	14.4	0.722	3265	1637	96.5
51909	NO	1049	122.96	7.5	41.73	43.58	12.942	22.171	5.969	4.16	214	254	18	461	6	0.894	0.842	0.653	205	1.22	25.1	1.8	40	440	755	112	7.34	4.4	0.48	1805	1159	57.2
51911	NO	4147	414.08	25.6	228.05	174.56	71.885	63.41	23.59	8.74	663	715	6	661	17	5.197	4.818	3.624	755	11.76	58.4	4.4	66.7	1872	3416	463	32.48	31.59	2.349	10752	5310	337.8
51921	NO	3690	311.65	24	92.67	168.14	52.816	67.722	34.951	25.03	567	675	0	1283	2	1.126	2.671	2.69	418	2.04	178.8	1.5	392.9	836	1665	518	14.85	9.8	2.065	3859	4035	81.1
51922	NO	2551	263.05	11.6	81.5	89.71	41.022	31.077	7.003	4.46	586	853	34	3148	118	0.991	2.073	1.853	226	7.16	284	9.3	241	836	1282	264	10.14	14.46	1.046	2951	3254	99.6
51933	NO	1907	286.33	29.9	90.94	50.43	19.854	14.711	10.065	6.76	812	980	324	1828	39	1.955	3.575	4.197	755	6.03	221.3	9.6	71.5	1751	1852	424	18.21	16.7	1.458	3642	4818	117.4
51944	NO	3704	470.29	30.7	148.9	129.48	46.369	46.167	21.257	8.89	691	1266	90	6646	409	1.867	3.593	2.918	811	10.13	71.2	13.6	435.5	1962	2592	472	22.78	21.39	1.904	5251	5809	157.8
51963	NO	3261	529.03	18.9	91.16	89.58	31.883	32.31	17.917	10.85	295	340	61	376	224	2.751	1.585	1.95	712	1.95	337.7	0.5	46.9	763	1383	332	17.05	8.54	1.309	4844	2828	119.9
51967	NO	1046	139.3	19.1	65.64	27.45	9.1	10.692	3.507	3.74	9	68	18	585	275	0.501	0.652	1.436	102	3.94	168.2	0.3	36.7	356	888	212	7.89	13.23	0.723	1023	1853	66.1
51968	NO	753	82.86	3.9	38.9	29.12	12.678	9.173	3.733	1.09	248	252	0	33	0	0.677	1.279	0.715	130	0.74	0.4	1.3	9.9	269	667	68	4.21	2.35	0.207	1204	635	47.8
51973	NO	3664	438.31	22.4	131.68	160.56	50.413	65.891	30.041	12.34	295	791	56	5913	46	2.557	2.11	2.109	811	2.8	164.8	2.3	65.5	1654	2128	408	19.66	12.51	1.767	5440	3394	207.8
51975	NO	2318	233.58	27.5	100.65	111.64	36.068	36.698	25.999	9.66	932	1334	136	4482	531	2.139	2.732	2.21	726	6.79	36.5	10.7	343.9	1112	1464	378	21.95	13.71	1.687	3554	2925	146.7
51976	NO	2090	269.65	21.9	66.48	65	19.162	23.542	13.913	6.11	390	594	471	2066	329	2.375	1.816	2.574	632	4.87	196.6	3.8	113.6	721	1298	367	23.84	14.08	1.509	4832	4118	100.6
51982	NO	2482	221.56	16.2	72.05	15.2	5.073	6.816	2.564	1.27	12	142	0	1538	0	1.773	2.077	2.925	675	2.02	7.1	1.6	86.2	615	1327	472	6.81	8.43	0.98	3925	3252	86.5
51995	NO	876	88.9	1.9	61.18	28.12	9.711	11.634	2.723	0.97	5	7	0	28	0	0.828	0.717	1.048	197	4.3	16.4	0.4	6.3	194	634	97	8.86	11.39	0.418	1948	999	72.7
51999	NO	1964	76.63	3.3	135.06	86.88	34.413	30.207	12.705	4.69	161	167	0	71	0	0.811	1.289	2.023	109	9.09	29.3	2.2	31	356	1108	186	14.27	25.15	0.743	2389	2156	155.1
52023	NO	2695	273.18	31.3	118.77	127.65	32.057	60.666	26.019	10.99	365	410	44	519	43	2.249	2.277	2.056	662	6.43	50.4	5.5	84	594	1861	396	21.83	16.52	2.354	5510	3928	193.9
52027	NO	2595	279.98	37.2	113.96	115.23	44.336	35.263	23.313	5.69	483	491	4	94	22	1.227	1.138	1.756	476	6.43	21.9	6.2	44.9	1639	2199	489	14.6	17.36	1.352	4348	2863	110.1
52031	NO	1832	241.29	8.1	88.02	60.04	28.121	20.763	6.622	2.06	959	1285	908	3521	24	1.309	3.676	1.58	208	11.17	118.7	20.5	73.3	2304	1969	311	5.84	14.9	1.135	3129	3632	84.2
52042	NO	3148	415.12	30.5	117.55	106.07	35.023	39.677	21.627	13.23	290	448	120	1718	204	2.822	3.223	2.659	727	5.42	52	0.5	124.1	1220	1785	473	25.42	18.92	2.314	8228	4445	165.7
52043	NO	2607	333.15	19.3	116.87	84.36	35.774	26.619	12.304	10.77	1969	2629	75	7787	186	1.561	3.997	2.738	549	12.77	344.3	41.4	679.8	2985	2718	570	13.62	13.64	1.619	4113	6278	101.9
52051	NO	774	109.96	9.9	31.36	24.6	10.721	9.81	2.837	0.9	69	192	437	1159	234	0.766	0.454	0.39	197	0.74	104.7	0.9	3.9	603	578	101	5.74	4.51	0.594	2923	988	29.4
52052	NO	2440	366.34	9.1	86.06	51.47	22.335	15.946	8.015	3.18	258	267	0	124	1	1.45	1.493	2.499	198	10.18	120.5	1.4	27.9	1011	1338	248	14.26	11.36	0.848	3643	2982	119.9
52058	NO	3720	402.73	21.4	106.5	104.02	38.765	34.033	20.33	8.14	536	682	68	1616	333	1.773	3.483	2.979	547	8.86	374.2	9.8	182.7	1297	2367	614	9.81	12.32	1.442	5189	4801	156.6
52063	NO	1713	240.63	15.9	69.52	54.08	11.157	18.79	18.333	9.33	1205	1442	0	2846	1	2.305	2.301	3.377	503	6.37	4.2	1	49.9	747	1235	259	28.17	10.8	1.218	4153	1793	106
52065	NO	3105	421.33	18.3	100.82	115.62	43.473	41.782	20.678	12.69	738	933	150	2006	514	2.553	3.263	1.455	756	3.65	214.4	4.8	154.9	1322	1649	345	22.85	13.03	1.783	8023	4085	181.9
52068	NO	2284	237.72	14.9	97.3	107.64	34.238	43.738	17.262	5.34	416	431	62	176	10	1.975	2.639	2.762	218	3.15	39.8	5.7	38.8	948	1641	282	11.21	11.05	1.32	3299	3294	135.1
52071	NO	1989	107.55	9.5	134.22	103.55	34.522	42.52	14.546	5.25	367	369	5	29	21	0.692	1.755	1.963	161	9.29	3.8	5.3	24.5	584	1597	221	14.09	23.79	0.721	2696	1813	145.2
52078	NO	2056	239.92	17.1	69.43	94.79	27.167	38.582	23.196	10.95	778	1118	53	4067	40	1.454	1.609	1.737	300	2	104.9	4.8	93.5	977	1176	264	9.92	8.58	1.346	3457	2708	112.1
52081	NO	3018	274.16	11.7	114.94	112.08	37.903	40.218	24.974	9.75	895	960	35	595	385	1.233	2.872	2.618	488	6.11	155.4	7.7	57.3	1439	1949	422	11.08	14.3	1.323	3471	3907	137.1
52086	NO	2474	400.67	29.4	65.59	75.49	31.59	24.25	14.805	5.83	803	825	63	211	96	2.186	2.799	2.958	670	4.84	180.3	8.6	33.4	1722	1739	405	16.38	14.48	1.321	2523	3691	88.1
52099	NO	2530	281.89	15	64.39	54.54	17.816	22.992	8.446	7.52	238	292	86	532	256	1.005	2.032	2.649	437	4.83	430.7	8.9	39.7	2053	1610	401	9.13	8.83	1.079	2497	3752	59
52103	NO	1974	103.68	5.6	27.4	18.75	4.937	8.948	3.594	1.48	3	7	30	31	0	0.713	0.985	1.137	225	0.93	10.7	0.1	12	186	546	146	5.44	3.95	0.438	929	1359	43.6
52109	NO	2583	257.81	18.3	118.63	121.4	58.621	40.21	12.077	4.76	591	620	7	319	12	1.412	2.489	1.72	302	7.6	5.6	10.4	34	1679	1930	338	15.93	19.46	1.483	3797	3359	114.9
52111	NO	1679	147	6.9	108.06	71.01	26.305	25.283	13.287	1.89	342	347	0	68	0	1.22	1.362	0.989	262	1.69	0.8	2	12.4	896	1227	176	10.65	10.55	0.653	3197	1447	124
52117	NO	3450	435.77	10.7	127.26	134.92	42.611	51.629	29.974	9.04	513	707	56	2281	10	3.228	3.945	2.081	269	5.03	25.8	8.3	201.7	689	1880	306	11.23	15.18	1.215	8191	4090	173.1
52122	NO	2972	291.29	40.3	119.79	133.49	36.105	57.014	30.04	25.53	394	482	141	943	81	1.477	3.065	1.685	603	6.66	48.9	6.5	115.1	2038	2461	708	17.73	15.91	2.664	4532	4787	145.1
52124	NO	3035	390	35.2	105.75	123.17	40.316	47.207	26.173	9.39	296	354	63	694	8	1.177	2.195	2.341	406	5.19	119.2	1	126.9	1011	1986	432	15.37	16.35	1.265	3717	3282	87.7
52129	NO	2340	185.97	26.9	100.45	87.59	21.179	33.059	25.855	8.37	225	847	1798	6459	300	1.267	2.313	2.809	382	2.76	130.8	1.5	177.6	694	1378	394	10.54	9.16	1.992	3476	4221	103.1
52134	NO	3362	366.74	22	146.92	144.23	57.449	48.828	22.316	8.16	800	818	0	173	1	1.986	3.408	2.076	513	8.55	35.1	13.9	60.4	1699	1995	429	22.82	23.05	1.733	4576	4908	158.1
52135	NO	2822	234.54	12.7	100.67	121.72	40.293	41.959	28.162	9.82	475	584	86	1170	177	1.826	2.21	1.975	354	9.38	51.2	16.6	122.7	659	1308	221	13.8	10.86	1.118	5315	2632	191.5
52138	NO	1851	244.47	9.1	66.94	68.29	22.989	23.181	15.58	6.73	742	781	66	456	5	1.353	2.875	1.526	466	6.06	12.3	8.5	34	1422	1516	254	22.09	9.66	1.059	2920	2401	73.9
52146	NO	1456	290.51	30.2	38.64	22.79	10.631	6.008	3.673	3.25	198	261	0	752	0	0.936	1.141	1.399	190	1.62	32.7	0.4	42.5	765	632	279	6.17	4.64	2.176	1279	2749	73.5
52148	NO	1222	140.12	2.9	57.18	39.15	16.987	16.422	3.169	1.7	492	494	3	36	3	1.027	1.69	1.039	220	4.05	25.9	4.8	12.4	895	1031	137	11.12	10.17	0.519	2025	1129	47.6
52152	NO	2720	373.77	16.4	109.39	78.42	26.006	31.646	10.453	4.61	780	890	303	568	1221	2.598	5.709	11.775	644	17.92	89.8	5	21.3	1325	1779	393	22.7	21.43	1.439	3655	3039	177.2
52162	NO	2629	355.27	23.2	99.44	92.67	28.312	32.874	21.642	10.73	134	731	2026	6146	22	2.394	1.822	1.693	549	1.47	67.6	2.3	228.3	844	1121	346	24.24	12.04	2.043	5549	2634	131
52167	NO	5634	352.76	48.2	253.51	348.41	59.686	154.24	113.429	45.2	463	592	1	1547	1	3.656	2.893	3.492	1245	2.3	30	3.3	155.2	1327	3966	1204	29.61	44.19	7.903	5890	6163	275.1
52168	NO	881	110.03	6.4	31	36.48	11.316	13.225	8.652	4.31	151	457	1234	3030	1	0.521	0.715	0.56	109	1.75	4.9	1	35	355	480	121	6.48	5.26	0.543	1984	1094	40.5
52172	NO	4350	369.19	35	230.75	212.04	61.31	87.912	39.838	12.26	149	229	0	894	0	4.178	6.114	6.558	705	6.69	98	3.6	90.2	568	2548	694	29.7	22.07	2.487	9737	10329	192.8
52174	NO	1263	144.24	10.7	54.3	54.99	10.653	26.031	14.15	11.91	189	198	48	56	70	0.804	1.482	1.422	206	1.18	85.5	4.5	16.1	783	908	233	6.93	4.7	0.932	1695	1936	83.5
52179	NO	3408	390.52	35.5	143.78	144.91	50.284	48.64	30.276	11.04	919	990	27	834	11	3.205	3.623	2.362	803	9.34	30.1	4.4	73.6	1990	2737	459	33.39	24.49	2.463	7516	3515	266.2
52181	NO	2503	266.24	12.9	88.1	121.67	44.128	44.084	21.63	4.49	408	445	6	421	8	2.274	1.941	0.902	438	4.39	10.8	6.2	44.8	1238	1638	216	15.1	11.39	1.742	5242	2041	140.9
52182	YES	3081	363.72	27	88.96	148.18	41.693	62.884	33.6	12.74	484	572	139	832	324	2.158	2.985	2.158	562	4.83	185.3	6.4	65.7	1366	2219	432	17.22	9.87	2.317	5168	4102	136.9
52192	NO	1248	208.32	18.5	52.11	26.01	6.189	6.448	10.633	2.5	704	744	70	411	66	1.864	2.041	1.83	394	2.32	21.1	2.8	50.1	682	963	230	19.49	5.37	0.776	2236	1882	113.9
52193	NO	2250	297.52	7.3	73.1	86.46	42.785	29.503	7.451	3.1	848	859	0	140	11	1.24	3.372	1.604	237	7.29	28.5	15	10.4	2082	1669	261	7.93	15.62	1.386	2508	2805	96.5
52203	NO	1451	198.28	14	68.99	42.97	8.522	16.853	14.424	6.76	91	176	41	942	67	1.34	1.159	1.741	388	2.82	102.9	4	90.1	486	808	293	9.74	5.32	1.09	3081	2477	125
52207	NO	1256	121.34	11.6	50.25	53.11	21.72	19.651	7.821	3	291	590	1176	3012	9	0.674	1.493	0.963	222	2.47	20.7	2	43.1	714	909	220	11.08	8.46	1.076	3267	2101	59.1
52221	YES	1916	169.5	9.4	78.2	102.55	34.079	34.558	26.899	12.12	595	799	599	2199	9	1.404	1.915	2.603	342	5.17	32.3	3.6	124.9	847	1278	200	11.63	7.75	0.785	3961	1839	117.2
52229	NO	2073	178.57	6.6	109.06	92.73	36.106	33.21	16.829	3.79	370	432	34	727	73	2.998	2.671	1.726	246	6.2	2.3	10.1	30.2	1266	2008	272	13.71	13.68	1.321	7589	2710	157.5
52233	NO	1899	152.87	19.9	82.67	106.59	25.869	36.542	36.827	10.41	329	989	2732	6519	57	1.723	2.383	1.065	296	4.46	33.1	7.9	207.3	664	1264	280	12.72	9.36	1.248	4003	2700	116.8
52243	NO	1081	100.06	4.3	25.85	65.71	19.918	26.644	13.169	6.06	212	223	0	129	0	0.407	0.522	0.546	105	2.11	12.4	2.9	29.4	316	420	86	4.71	4.55	0.448	1904	1237	33.3
52247	NO	3090	328.07	18.5	113.64	98.45	33.874	40.367	16.124	7.58	1614	1760	122	1680	22	3.249	5.028	4.356	1230	12.11	18.7	13.2	110.1	1439	2011	574	73.47	11.66	1.914	3740	4159	143.5
52249	NO	2633	352.22	13.3	102.46	91.26	21.024	30.395	33.763	4.68	146	171	29	283	4	2.381	2.68	1.582	467	2.88	4.7	1.9	48.8	1406	1823	272	15.35	8.02	1.014	5571	2603	144.1
52250	NO	2174	204.83	15.1	96.3	107.84	37.301	37.003	26.95	11.1	716	730	5	133	19	1.365	3.098	3.018	333	11.19	56	21.3	67.3	1390	1845	314	15.42	9.87	1.261	3828	3818	156.4
52251	NO	2442	335.48	17.9	112.53	75.98	25.413	24.8	19.705	9.29	1108	1140	34	346	22	2.207	4.141	1.051	581	6.04	76.3	12.1	59.6	2542	2547	346	15.64	13.18	1.154	4495	4015	143.1
52272	NO	1861	224.83	9.4	92.43	67.33	29.771	24.129	5.813	2.66	752	827	41	907	0	1.457	2.906	1.28	289	8.16	61.4	14.1	24	2056	1885	348	10.03	12.84	0.838	4153	2848	142.2
52273	NO	1533	171.13	16	75.78	59.81	19.182	22.121	14.057	6.33	370	420	82	547	11	1.969	1.466	1.789	510	2.96	28.2	3.5	42	557	1203	247	13.18	7.34	1.249	3836	2813	146.5
52275	NO	1753	307.31	31.1	55.11	39.21	10.191	12.926	12.209	3.48	41	42	0	11	4	0.595	0.517	1.125	155	1.93	63	0.6	21.4	498	1552	344	11.53	9.74	1.028	983	1749	47.2
52282	NO	3664	447.92	21.8	118.68	115.54	36.033	37.269	30.728	15.25	397	531	55	1552	16	2.958	2.279	2.987	797	11.54	63.2	1.2	138.6	1289	1985	385	26.36	13.31	1.548	5883	3214	183.2
52283	NO	1532	240.24	23.9	58.36	33.7	6.431	13.464	11.217	5.51	584	978	1582	3906	44	1.507	1.788	2.39	639	4.75	54.5	4.3	80.1	711	861	331	29.93	6.49	1.376	2729	2757	45.3
52289	NO	2067	332.61	8.1	63.49	56.51	25.049	20.301	6.924	3.22	696	750	21	441	437	2.247	2.938	1.506	486	7.76	143.9	10.4	22.5	1460	1613	207	16.4	8.21	0.761	3022	2316	83.1
52296	NO	1567	256.12	24.4	58.76	35.2	6.903	13.588	10.791	8.51	65	167	75	1166	16	1.451	1.548	1.019	457	1.26	114.9	0.9	76.9	305	991	189	14.02	8.67	1.366	2357	2274	102.4
52304	YES	2261	294.65	28.3	65.4	102.68	24.673	44.82	27.881	23.38	551	664	60	1359	4	1.543	1.732	3.498	635	7.42	106.5	1.8	242.3	597	1222	455	20.06	9.93	2.802	3105	3046	74.1
52307	NO	1656	170.52	10.1	63.38	45.94	10.52	22.628	10.092	7.04	16	49	21	386	6	1.034	1.991	5.984	266	7.42	33.7	1	33.7	419	677	225	10.49	10.8	1.852	2640	1751	101
52322	NO	888	151.14	15.3	26.09	21	3.381	8.165	8.266	3.62	643	653	3	117	16	1.248	0.806	1.19	393	0.01	6.4	0	26.8	452	492	206	18.1	4.56	0.809	1193	1215	33.2
52337	NO	1416	170.4	12.4	66.46	52.64	9.918	19.626	19.81	10.53	517	818	2	3610	0	1.725	1.768	1.09	592	3.82	35.2	4.2	248.1	758	1011	230	20.18	9.22	0.934	2650	1972	136
52341	NO	4089	606.16	32.2	179.89	116.11	44.358	38.493	20.334	8.66	1390	1505	121	900	815	3.302	3.358	4.05	791	4.82	53.9	3.4	44.2	1651	2800	627	36.56	22.16	1.701	6866	3537	248.2
52348	NO	3848	511.83	39.8	106.16	156.11	53.346	53.692	35.212	7.21	702	850	859	1324	3	2.67	2.79	1.874	783	2.49	16.9	3.8	48	1499	2057	486	23.39	12.66	2.036	6490	4104	165.2
52349	NO	1495	233.27	11	53.82	41.57	8.884	10.938	19.533	6.04	55	56	0	11	2	1.92	2.06	1.459	231	5.54	16.1	0.2	5	255	975	112	6.77	4.41	1.842	1904	1229	28.8
52350	NO	1431	170.93	12.2	83.61	50.57	25.293	15.368	6.529	2.96	400	639	890	2387	20	4.729	5.397	1.884	264	1.2	24.4	8.1	19.3	856	1252	238	35.97	7.28	1.972	1846	1986	40.5
52366	NO	2242	278.91	30.1	86.23	94.86	22.13	35.005	29.411	14.73	310	702	75	4490	414	1.843	2.395	2.007	610	3.38	505.1	3.2	294.7	749	1367	391	17.6	11.24	2.049	5404	3591	146.3
52372	NO	2020	257.13	15.4	60.06	88.18	20.584	40.675	20.048	16.98	224	262	28	451	3	1.127	1.807	1.041	250	3.42	27.7	3.3	29.3	986	1084	333	10.53	9.12	1.401	2300	2108	55.8
52375	NO	1961	241.42	14	90.6	73.49	31.604	25.358	9.02	3.04	624	650	2	301	3	1.679	1.967	2.541	298	6.31	11.3	5.2	25.1	954	1433	258	18.15	10.94	0.973	3409	2139	123.2
52384	NO	2213	255.36	11.8	93.79	89.57	28.661	35.515	15.512	5.36	229	235	5	78	16	2.003	2.181	1.465	450	6.13	11.9	3.8	29.6	577	1134	201	17.69	15.95	1.044	3452	2240	140.9
52397	NO	2238	271.67	19.1	92.5	66.08	21.598	25.982	11.706	3.2	75	246	552	1766	20	1.973	1.997	1.739	337	2.56	27.2	5.4	66.2	499	1587	302	12.6	12.15	1.117	2782	2217	124.6
52411	NO	5618	451.29	34	290.89	291.68	107.69	115.975	36.187	19.5	229	794	1428	6010	106	2.629	3.76	4.56	570	24.42	92.3	6.1	212.8	1553	3213	655	41.54	62.25	3.196	8382	6700	328.5
52413	YES	2121	254.84	12.7	60.41	98.81	39.519	35.555	17.381	9.02	502	541	119	388	20	1.25	1.184	2.338	250	7.06	27.8	1.8	92.7	446	833	234	10.93	9.38	1.325	2998	2534	74.9
52422	NO	2090	228.2	16.6	85.59	93.59	21.968	37.533	27.266	11.07	144	431	999	2921	121	1.603	1.612	1.425	283	3.07	214.8	2	90.5	570	918	206	11.92	10.3	0.949	2960	2058	151.8
52431	NO	2226	278.95	7.4	63.33	98.58	32.268	32.676	25.274	7.94	363	432	11	802	26	1.22	1.451	1.324	224	16.87	39.5	7.6	69.7	981	1264	221	13	47.72	4.25	4808	2814	84.2
52433	NO	2780	165.42	6.7	155.94	121.13	60.532	42.608	6.91	3.78	546	616	118	766	44	1.806	2.488	2.392	349	9.88	89.5	2.7	31.7	1983	2411	319	13.98	25.67	0.896	5529	3625	154.3
52434	NO	2139	344.67	25.4	83.03	52.76	16.703	19.806	11.428	12.17	567	642	112	779	100	1.895	2.715	1.836	463	5.78	83.8	14.3	78.8	1123	1404	421	19.16	10.02	2.064	3449	3669	173.9
52439	NO	3250	284.45	16.8	75.25	105.59	38.43	38.828	16.532	6.24	313	341	30	337	9	1.435	2.453	1.341	343	3.53	169.9	1.7	28.2	863	1535	331	17.99	24.41	1.788	4212	3947	82.2
52444	NO	2372	340.23	23.5	63.48	88.81	26.918	29.985	22.984	15.85	309	486	545	1811	104	1.501	1.096	1.412	347	2.87	111.1	0.7	47.7	712	1157	348	14.73	12.84	1.27	3904	2093	93
52450	NO	4684	478.21	23.9	216.21	211.69	75.104	80.864	37.425	15.08	541	593	82	525	67	3.199	3.379	5.096	639	11.52	168.7	7	107.2	1716	2722	474	29.41	31.55	2.307	7184	5673	248
52458	NO	1636	131.47	11.7	54.34	82.22	26.76	30.2	18.776	10.53	567	1061	6	5938	17	1.696	1.814	2.67	377	5.36	52.3	7.4	504.4	1024	1003	225	27.96	5.73	1.155	2995	2257	69.6
52462	NO	2369	249.42	16	90.89	114.67	28.47	30.168	42.384	9.59	111	426	41	3713	76	2.311	1.488	1.991	236	2.95	127.9	2.1	301.7	453	1098	257	11.36	12.35	1.115	4391	2946	100.2
52469	NO	2809	460.25	26.2	120.37	60.47	24.372	21.141	10.396	11.14	1313	1400	69	947	131	3.159	5.743	3.705	764	11.66	192.5	16.4	30.7	2004	2535	554	32.65	24.59	2.017	5556	5778	142.5
52490	NO	1833	88.08	2.8	118.16	65.89	23.436	26.72	6.871	4.1	0	26	76	265	36	0.614	0.782	2.551	148	6.42	147.4	0.8	19.2	131	973	176	11.06	21.21	0.656	2213	2338	127
52492	NO	1477	257.56	15.4	53.91	29.13	11.321	8.971	5.436	3.22	345	392	55	473	130	1.426	2.09	1.855	361	3.02	111.7	4.8	33.1	880	938	272	14.3	8.14	1.123	2096	2450	99.9
52493	NO	1323	142.86	3.4	26.35	7.97	1.691	2.073	3.178	0.82	4	23	27	218	0	0.592	0.789	1.249	200	0.67	22.9	0.4	32.5	476	599	231	3.42	2	0.477	1163	1192	45.4
52499	NO	5072	748.78	27.2	165.45	168.02	66.841	51.556	30.066	8.34	1257	1335	91	790	32	3.57	5.115	4.683	784	12.04	121.8	22.3	97	3169	3238	518	36.09	15.44	2.162	6137	5244	238.5
52509	NO	2228	176.37	12.9	72	71.47	20.351	19.784	25.676	3.88	491	787	22	3569	2	1.914	3.135	2.303	660	4.4	96.2	4.9	229.7	1039	1326	339	16.99	15.14	1.141	3156	3196	90.4
52517	NO	4137	457.51	24.9	151.47	182.21	70.722	63.131	28.768	11.03	565	651	8	987	5	4.304	2.469	1.724	935	6.61	47.5	0.8	81.4	1885	2456	334	29.36	19.78	1.59	8223	2950	242
52525	NO	937	131.52	14.8	47.1	25.55	5.785	9.835	7.968	3.64	33	327	1066	2728	561	1.136	0.65	1.059	184	0.84	75.6	0.9	59.8	282	645	170	7.82	4.69	0.746	1698	1730	68.4
52532	NO	2130	303.52	14.4	100.77	59.83	16.309	22.785	13.788	5.85	612	617	0	62	2	1.687	1.93	2.554	351	4.07	43.6	4.4	31	828	1340	298	16.9	16.33	1.649	3423	2761	132.4
52535	NO	1336	161.12	9.5	75.41	44.87	19.025	15.547	7.013	3.34	482	499	119	164	18	2.132	2.665	1.435	181	5.19	21.4	9.8	44.9	1185	1342	263	8.23	8.88	0.555	2089	2597	91.9
52545	NO	1675	159.39	16.6	60.72	51.7	19.116	19.017	9.262	7.92	452	544	14	1029	152	1.26	2.793	3.073	489	5.83	144	3.2	148	463	1034	347	12.63	10.64	0.958	1979	3694	59.1
52547	NO	1545	185.52	15.3	53.13	71.37	19.34	28.981	18.445	10.64	319	695	557	4179	159	1.046	1.147	0.998	355	1.18	73.8	1.9	231.4	579	854	286	11.86	6.85	1.238	2882	2340	57.6
52557	NO	1872	226.74	15.4	41.42	62.19	13.732	22.306	21.888	9.8	157	212	28	592	94	0.607	2.186	1.929	234	1.03	129.2	4.5	36.8	1135	1026	348	6.2	6.35	1.092	3393	3199	52.1
52561	NO	3901	416.64	46.3	160.02	177.97	62.7	65.427	38.416	11.66	585	1236	2498	6586	8	2.547	2.493	2.328	854	3.54	81.4	4	129.4	2280	2842	604	25.12	19.28	2.559	6139	5278	181.9
52565	NO	907	142.42	6.8	45.82	17.35	5.442	5.391	4.435	2.11	79	128	120	529	0	0.64	1.077	1.105	125	0.92	31.5	0.9	30.3	198	542	133	4.31	5.52	0.539	1364	1674	45.8
52575	NO	1386	64.82	1.5	73.6	93.01	50.496	28.119	4.309	2.1	666	678	0	156	0	0.494	1.304	0.674	155	3.31	2	2.1	6.6	1313	1239	195	3.95	5.67	0.599	3276	1682	68.1
52576	NO	1530	236.44	40.7	49.51	46.99	9.093	16.409	18.831	5	10	10	0	5	4	0.905	0.468	1.189	324	0.18	5	0.1	40.4	715	1649	468	9.77	7.81	1.47	1075	1919	57
52577	NO	1819	230.75	29	69.42	79.01	15.084	38.628	20.076	13.78	37	213	594	1749	125	1.123	1.748	2.272	355	2.51	121.2	0.9	97.5	437	1101	503	11.86	12.93	2.044	2140	3987	66.4
52581	NO	3305	425.92	15.7	138.46	116.31	36.856	42.079	26.709	7.71	435	779	1469	3370	13	2.228	2.935	2.253	568	7.32	162.2	9.9	176.9	1463	1931	402	20.88	18.66	1.531	5850	4204	148.4
52591	NO	2194	193.62	17.7	106.56	113.14	37.437	41.994	22.067	5.81	445	899	1729	4467	195	1.23	1.648	2.635	227	2.76	125.8	2.8	60.2	560	1385	243	9.5	9.14	1.002	3302	2960	108.6
52592	NO	1924	178.91	16.3	127.99	79.48	27.447	28.651	13.146	3.23	270	292	49	171	132	0.677	0.986	3.096	111	3.42	28.7	0.6	19	299	1362	295	9.53	15.21	1.027	2504	2532	114.4
52607	NO	1980	309	26	95.58	41.81	12.134	14.576	9.919	5.7	168	261	236	564	880	2.363	2.097	1.938	661	3.07	278.9	8	33.2	1679	1290	311	15.6	10.99	1.336	2762	3207	125.4
52609	NO	2262	361.38	24.3	64.07	65.65	17.938	21.628	21.602	6.19	135	331	474	2102	2	2.061	1.758	1.247	588	1.48	21.1	2.8	79.8	879	1160	364	17.09	9.85	1.661	4395	2735	109.6
52617	NO	2491	349.69	13	70.92	94.24	30.562	36.63	19.256	5.7	315	331	0	141	31	1.043	1.466	1.477	173	1.94	27.7	0.6	31.7	634	1248	138	9.9	6.26	0.569	3553	1992	96
52619	YES	2631	307.86	23.1	110.89	109.67	28.385	39.878	28.598	7.97	329	573	119	2881	21	2.144	2.974	2.799	478	6.37	162.8	5.3	92.5	1118	1720	359	16.85	16.6	1.217	3612	3966	143
52632	NO	2373	263.43	24.7	95.09	108.37	30.827	42.786	25.747	7.8	235	315	82	911	23	1.849	1.523	2.067	362	2.34	42.1	1.8	82.7	1337	1638	296	14.71	9.72	1.074	4196	2458	104.3
52638	NO	977	128.05	9.5	50.42	29.95	8.415	12.564	5.497	2.33	366	453	20	974	158	1.275	1.456	1.933	234	4.01	25.5	1.1	25.2	514	885	148	11.97	5.64	0.714	2939	1453	77.6
52640	NO	5186	434.99	15.1	255.89	220.25	101.575	76.214	18.828	7.21	1316	1346	3	341	15	3.339	5.329	3.186	634	16.29	10.9	25.4	25	4183	4380	480	30.34	41.55	1.705	7650	4229	391.9
52642	NO	2646	406.48	29.5	100.89	72.36	28.764	27.039	8.027	3.38	281	294	0	145	3	1.223	1.993	1.796	314	6.54	5.3	6.9	17.4	1074	2019	399	16.05	19.36	1.219	2795	2910	92.7
52643	NO	2079	237.43	7.6	89.74	87.81	24.655	36.022	19.87	4.66	154	191	43	395	9	1.387	2.017	1.304	318	5.97	5	2.2	29	803	1511	254	11.88	13.77	1.531	3681	2545	116.3
52647	NO	3510	441.4	31.7	129.3	127.74	50.708	48.716	15.822	7.33	605	683	43	832	46	2.836	3.56	2.6	772	10.71	49.9	17	90.9	2756	2549	476	19.69	21.94	2.185	5950	4555	193.8
52653	YES	2427	408.11	57.8	89.22	59.61	11.141	27.769	14.667	12.32	474	911	185	4818	744	2.286	1.97	3.144	649	2.16	315	2.6	119.3	827	1584	578	27.05	16.41	2.944	4224	4381	96.6
52655	NO	1065	139.97	10.3	44.76	35.78	11.958	13.557	7.644	2.85	214	252	38	444	10	0.98	1.225	1.665	124	1.95	35.9	4.1	43.7	397	732	165	5.1	5.1	1.049	1710	2284	63.8
52661	NO	3208	206.96	34.1	153.03	187.23	31.263	99.251	44.548	57.24	512	611	34	1171	20	1.853	4.611	1.774	660	2.29	76.9	5.4	177.3	1065	2313	803	28.51	18.27	3.468	3475	3441	154.5
52671	NO	2325	295.21	2.7	64.05	49.21	20.525	16.362	8.417	2.94	150	164	20	168	1	0.576	0.971	1.584	236	5.17	10.8	0.7	16	687	966	222	7.74	12.17	0.547	1726	1582	60.5
52688	NO	2367	217.53	18.5	95.6	124.04	32.647	49.236	30.169	8.57	692	726	18	376	55	1.457	5.476	11.034	396	14.61	64.8	10.2	48.1	926	1587	337	17.03	10.69	1.151	4915	2015	175.4
52691	NO	2225	260.08	18	48.04	116.57	40.677	41.761	24.841	11.65	685	1030	41	4089	85	1.596	2.138	1.811	522	4.85	56.9	4.3	386.8	785	925	268	19.47	7.21	1.162	3053	1972	66.8
52693	NO	1806	285.33	16.9	50.25	43.03	11.842	16.203	12.397	2.93	84	118	56	371	18	1.472	0.736	2.294	249	0.71	91.2	0.6	39.2	254	899	281	6.05	5.35	1.139	2141	2717	65.6
52700	NO	2538	281.14	23.7	123.32	108.08	45.413	36.4	15.249	11.12	1065	1114	51	521	53	2.411	4.19	3.83	590	14.39	66.7	8.5	46.6	1102	1961	429	34.1	30.41	1.685	4156	4018	149.6
52708	NO	3238	419.18	16.2	166.94	104.14	36.291	33.667	21.63	6.01	200	305	88	1185	2	1.666	2.365	3.094	354	8.81	117.4	1.3	72.1	929	2316	584	17.36	26.46	1.961	6923	4943	180.1
52718	NO	2288	185.5	10.5	96.98	128.72	44.116	48.985	23.336	7.62	552	613	197	629	35	1.131	1.648	1.874	280	6.77	29	5.4	80.3	361	1172	204	14.11	16.28	1.055	3036	2576	148.4
52721	NO	3377	200.2	11.3	186.1	191.96	67.756	69.412	39.135	12.26	684	719	45	382	28	1.965	2.913	2.698	472	10.21	24.2	10.3	68.9	2754	2865	350	23.35	27.87	1.344	7016	3290	210.3
52723	NO	384	34.06	5	19.56	10.87	3.472	4.171	0.501	0.97	8	22	0	174	2	0.267	0.531	0.553	113	1.35	86	0.2	245.7	189	290	82	2.74	3.99	0.165	1068	988	18.4
52728	NO	2965	403.02	13.7	107.79	94.06	43.96	29.971	10.37	4.11	530	668	238	1491	68	1.684	1.618	2.16	428	3.56	124.4	1.5	60.7	1197	1558	243	12.71	9.23	0.875	3393	2730	131
52733	NO	2631	279.41	14.8	113.03	122.17	40.01	45.333	25.052	11.98	535	1040	1999	5053	10	1.854	2.254	1.49	522	3.79	102.4	11	162.5	2166	2580	347	15.94	12.16	1.284	5534	3019	146
52741	NO	1953	281.87	29	97.23	56.54	19.155	19.293	13.436	8.93	1452	1558	129	1167	105	2.087	3.524	2.142	573	7.45	179.8	15.6	153.7	2157	2215	388	17.28	14.27	1.217	4161	4182	101.8
52756	NO	1879	250.42	40.9	95.7	66.5	15.807	24.813	21.678	19.83	787	2026	164	14484	638	1.635	2.531	2.745	685	6.04	380.3	6.9	607.7	1384	1765	490	16.17	10.7	2.486	3121	4407	65.2
52761	NO	4304	432.73	22.4	153.83	220.4	74.998	74.874	50.329	11.81	1124	1161	54	387	93	2.62	3.284	2.637	525	8.63	332.6	10	77.9	2207	2579	401	46.39	31.6	1.674	6737	4403	214.1
52764	NO	2813	265.9	15	139.59	133.18	32.543	53.006	36.335	9.92	292	373	197	487	783	2.022	2.428	2.987	419	2.68	141.7	5.7	56.9	931	2008	323	16.59	10.8	1.346	5192	3264	267.9
52766	NO	1403	141.07	11.9	71.16	63.1	21.454	19.895	16.482	11.54	260	429	118	1776	372	0.744	1.36	2.214	224	2.03	141.9	0.6	39.1	708	968	236	8.08	8.28	0.888	2076	2048	85.2
52786	NO	1689	234.42	18.4	87.79	47.55	20.078	14.977	8.879	18.78	212	957	1281	6518	3550	2.75	3.143	3.652	649	7.38	123.9	3.5	80.7	1369	1071	236	29.18	22.88	1.268	4208	3080	106.5
52795	NO	1471	165.77	17.2	65.04	61.92	12.383	26.593	19.098	8.51	126	293	516	1733	42	1.1	1.223	1.334	368	2.39	36.9	2.2	116.4	399	811	226	11.05	6.45	1.377	3323	2371	75.3
52808	NO	836	92.08	13.2	57.48	28.55	14.788	8.183	2.907	20.6	482	581	2	1195	5	2.842	3.501	3.539	699	11.59	147.2	7.1	132	2249	1127	190	27.46	26.74	0.66	2398	1831	72.1
52813	NO	1875	176.83	8.5	84.81	94.57	37.673	39.51	11.813	21.36	876	1234	200	4195	6	4.017	4.765	4.035	779	12.76	133.2	7.6	283.1	1011	1244	241	29.89	29.43	0.863	4162	2698	89.8
52815	NO	2178	243.05	22.4	87.74	89.01	32.264	29.717	18.505	11.58	245	583	664	3660	138	1.858	2.349	1.982	483	5.88	123.6	1.4	178.7	682	1098	326	14.83	12.06	1.534	3532	4078	92.6
52822	NO	2185	258.81	12.8	86.78	88.89	28.59	37.034	14.445	4.74	263	297	212	309	40	1.839	3.261	2.146	189	3.21	227.7	7.2	82.8	467	1121	310	11.35	12.62	1.26	2598	4326	109.3
52836	NO	4422	469.97	24	91.18	232.37	53.256	70.901	88.496	21.66	144	1124	92	11745	8	1.434	1.876	2.46	531	6.3	105.9	1.4	1155	800	1986	335	19.21	17.62	2.03	8173	4319	93.5
52839	NO	1470	112.3	7.8	88.4	73.93	15.269	21.06	29.278	9.76	121	832	82	8317	361	2.611	1.876	1.01	381	6.54	118	3.1	690.1	586	1034	184	13.21	13.33	1.463	3453	2492	58.1
52846	NO	1820	295.42	12.6	61.76	48.54	18	17.842	7.923	2.78	83	105	7	244	13	0.744	3.894	4.704	128	12.82	5.8	1.7	10.9	505	1073	198	9.24	8.81	0.684	2705	1219	64.7
52848	NO	2062	277.02	22.2	110.91	57.75	12.053	22.658	17.302	6.07	36	487	1776	4484	101	1.703	1.489	2.735	392	3	115	0.4	49.9	517	1359	363	14.46	15.81	1.366	4393	3205	178.3
52852	NO	2010	302.7	16.7	52.35	68.76	22.291	25.829	14.707	10.56	286	375	59	1042	1	1.807	2.217	1.749	419	1.47	32.2	0.7	58.6	956	819	258	12.13	7.1	0.891	2670	2880	79.1
52857	NO	2344	267.16	8.6	77.93	88.56	33.392	33.68	16.303	4.22	648	653	0	16	1	1.262	2.001	2.792	254	5.02	8.1	2.9	40.6	829	1401	260	13.06	7.65	1.192	6240	2032	129
52865	NO	1637	219.68	17.7	86.28	34.23	7.639	8.986	13.382	4.03	83	724	2126	6592	110	2.298	2.273	1.367	632	1.35	56	5.4	125.9	357	1090	291	17.43	10.07	1.015	3170	2727	155.2
52866	NO	2394	377.03	5.2	64.04	72.69	20.22	30.105	15.595	5.36	461	474	3	156	3	1.705	1.699	1.138	322	4.71	0.6	1	64.4	300	1058	124	15.85	12.09	1.05	2443	1199	84.7
52869	NO	1851	170.89	13.4	110.53	81.39	29.315	27.369	18.613	5.35	422	438	0	180	0	0.983	1.458	2.006	146	2.08	2	1.4	36.7	756	1139	236	9.17	10.52	0.764	2954	1867	111.1
52874	NO	3090	365.86	51.8	125.73	109.49	29.114	40.301	28.841	13.8	251	372	89	1404	35	1.091	1.807	3.701	377	7.25	155.4	3	63.5	700	2659	647	21.97	25.88	2.092	4406	4533	130.4
52881	NO	1728	274.49	23.9	80.88	36.38	13.65	12.131	6.06	2.85	104	1132	4091	10295	0	1.025	1.654	3.069	228	0.63	122.1	0.5	66.8	545	1348	370	10.47	8.38	1.611	2692	4946	62
52882	NO	1156	113.33	4.4	31.44	63.72	19.669	22.309	16.484	5.34	239	248	2	100	1	0.668	1.534	0.355	124	1.88	6.4	0.7	21.2	433	601	129	4.21	3.57	0.616	2250	1230	58.4
52883	NO	1127	131.04	14.3	47.84	47.24	19.198	15.786	7.336	3.87	113	125	0	140	20	0.561	0.468	1.62	52	3.76	25.1	0.6	26.5	159	686	217	6.95	9.34	0.99	1811	2057	50.4
52893	NO	1948	213.06	13.7	66.4	75.01	21.125	26.255	18.323	4.15	219	248	19	307	41	0.978	1.546	1.627	283	3.26	28.6	5	40.1	411	1270	237	8.34	8.46	1.033	3347	2445	108
52903	NO	2326	322.18	13.4	59.42	95.33	34.576	31.712	22.186	8.52	426	451	9	299	12	1.06	1.725	1.13	246	3.25	31.1	4.7	34.5	967	1125	246	12.36	9.54	1.165	2840	2588	80.9
52909	NO	2195	188.06	10.8	60.13	134.92	40.749	53.678	30.775	8.95	378	387	1	121	2	1.694	2.801	1.779	255	3.92	49.9	4.5	71.4	1052	1175	260	9.16	9.69	1.293	3820	3683	63.6
52931	NO	2097	189.61	10.2	148.4	81.7	26.957	27.087	18.816	7.09	375	414	49	445	45	2.365	2.754	2.463	338	7.02	6.7	4.6	108.7	789	1691	301	17.46	23.94	1.231	3778	2900	194.2
52942	NO	2066	316.24	30	71.86	62.73	20.004	22.247	14.883	6.63	683	1319	172	7470	174	1.788	3.665	2.169	524	6.79	92.8	9.8	634.7	1346	1817	369	19.55	11.65	1.019	3367	3441	72.8
52949	NO	2109	259.16	20.5	79.73	83.48	31.247	28.465	17.482	7.85	561	1079	2304	5040	2	1.646	2.456	1.445	423	6.18	19.1	11.4	98.8	1661	1580	309	11.34	12.54	1.411	3894	2402	111.6
52952	NO	2535	264.21	31.2	117.76	122.1	47.921	52.974	11.271	7.64	431	662	1660	1929	68	2.006	1.679	3.54	444	3.15	92.7	6.6	62	1122	1752	382	11.84	11.54	1.384	4041	5104	182.3
52967	NO	3596	256.29	14.4	113.43	172.05	69.03	45.771	45.525	15.3	709	1322	125	7298	17	2.383	4.84	1.668	658	5.63	55.4	5.7	685.9	1562	2044	395	20.65	13.79	1.331	6523	4542	166
52971	NO	1300	164.53	10.8	47.51	51.25	20.662	16.146	8.502	5.06	379	411	0	387	0	1.092	1.569	0.466	197	2.2	1.9	2.7	26.1	878	976	202	10.7	6.37	0.88	2896	1287	81.4
52976	NO	2526	271.1	15.6	132.04	100.22	34.69	39.664	18.299	3.17	232	262	58	295	12	2.174	3.109	2.334	247	5.52	59.3	8.7	38.6	831	1790	327	12.88	19.92	1.604	4275	3901	138.2
52979	NO	3226	380.17	33.5	124.05	114.89	25.125	49.089	34.457	17.77	354	394	1	473	4	1.776	2.707	2.645	702	3.35	28	7.7	66.3	1207	2252	701	21.9	13.4	2.641	5916	4533	108.9
53000	NO	1486	256.42	24.4	66.55	24.34	9.087	6.679	5.059	2.63	345	1008	2300	6605	418	1.972	2.475	1.235	290	2.66	61.3	7	64.3	1473	1290	306	12	8.11	1.292	2349	2871	85.6
53004	NO	1501	207.3	20.6	76.91	41.25	14.694	16.376	5.745	4.43	202	387	258	1573	1015	1.483	1.428	1.626	500	3.86	75.7	4.3	20.9	654	874	283	21.83	8.36	1.38	3214	2738	65.9
53005	NO	3676	483.91	22.5	136.1	134.45	42.595	56.609	25.019	11.04	249	765	1545	5329	180	2.213	2.373	2.699	657	6.39	233.2	3.4	122.5	1122	2178	400	22.92	24.22	1.566	7149	4782	135
53006	NO	2095	239.13	19.3	88.98	88.68	40.58	28.506	14.509	3.32	1226	1268	236	389	38	2.023	3.21	1.835	465	3.71	25.9	6.8	85.3	2192	1953	320	21.23	12.2	0.883	3988	2509	118
53010	NO	8077	749.67	69.1	212.79	344.19	126.274	135.32	56.297	20.36	586	2519	501	22875	146	4.795	5.378	5.302	1864	6.19	108.8	9.4	2146.7	3320	3862	1011	43.92	23.98	3.743	11263	6716	276.4
53011	NO	1596	212.47	13.9	59.29	58.94	17.614	24.683	11.323	4.93	573	620	34	502	108	2.358	1.999	2.271	502	6.57	74.5	4.8	46.8	564	854	195	21.74	13.69	0.691	2882	1884	80.3
53025	NO	3081	519.74	11.8	97.64	71.54	22.968	26.636	11.787	5.85	176	234	124	468	422	1.942	1.811	3.706	387	9.9	1006	30.8	31.6	754	1586	467	9.39	6.89	1.991	3238	6571	136.1
53035	YES	897	82.89	3.8	33.73	38.98	14.624	10.545	8.91	4.5	118	170	70	579	2	0.303	0.71	0.9	84	1.71	35.7	0.7	68.4	154	365	78	4.1	6.34	0.303	1380	1308	37.1
53038	YES	2262	284.99	24.9	100.15	85.81	20.155	27.708	29.005	10.3	629	1553	2234	9949	95	1.591	3.206	3.541	896	3.69	207	7.9	206.7	1301	1697	392	26.16	11.52	1.391	3403	4293	137
53040	NO	1358	177.41	9.4	40.5	55.21	17.625	20.647	11.56	2.68	358	394	27	388	58	1.535	1.323	1.197	317	3.15	24.6	4.1	37.9	628	774	192	11.65	9.91	0.864	2456	1450	88.9
53043	NO	1272	165	8.6	54.97	39.82	18.537	10.735	5.52	3.15	534	578	69	297	387	1.247	1.704	1.668	190	3.66	104.4	9.1	27.9	1287	1096	218	4.46	6.9	0.859	1735	2457	68.8
53053	YES	2459	311.93	24.9	60.48	111.26	46.179	32.463	21.389	10.57	369	445	0	889	27	1.368	1.667	1.171	296	2.56	17	1.2	61.4	847	985	242	11.14	8.89	1.221	2728	2201	108.8
53054	YES	2778	239.22	13.8	186.83	101.28	28.044	34.417	28.598	13.45	963	1034	86	805	5	8.676	9.863	5.915	496	18.44	78.5	53.6	80.9	3075	2810	589	58.84	12.11	4.326	4267	4676	200.2
53055	NO	3152	362.84	22.7	121.05	121.9	27.205	44.939	37.377	22.97	673	850	0	2134	15	2.149	2.915	2.706	526	5.21	10.3	6	140.1	915	1560	345	23.65	13.68	1.693	5238	3121	248.2
53102	NO	1909	247.08	23	90.43	67.76	22.918	22.434	17.697	12.3	1275	1321	59	567	2	2.985	4.424	2.893	643	14.15	44.3	19.3	52.5	1689	2115	479	29.69	20.66	1.797	2904	3044	158
53103	NO	1792	105.7	22.2	81.96	97.9	28.669	44.098	18.255	19.69	321	430	57	1180	223	0.757	2.6	1.745	240	2.04	128.4	3	65.9	1238	1413	431	8.44	9.49	1.299	2146	3175	58
53114	NO	819	107.61	11.4	52.84	19.55	6.119	6.611	4.715	2.7	527	755	718	2354	67	1.391	2.07	1.852	601	4.58	75.5	5.8	69.1	758	770	193	15.61	14.86	0.553	1309	1455	61.8
53116	NO	1432	168.57	17.3	74.21	52.32	13.192	16.58	17.475	4.12	57	61	0	46	0	0.597	1.09	1.426	197	1.53	0	0.9	22.5	400	777	202	16.76	11.37	1.043	1963	1603	92.6
53121	NO	2697	455.66	19.3	83.13	63.89	22.842	21.476	12.505	5.64	431	1627	4	14351	30	2.157	2.391	2.388	232	3.96	517.1	9.5	324.7	1226	1595	437	11.05	9.06	1.154	3705	4750	135.2
53124	NO	2054	187.36	36	121.62	96.14	36.297	33.879	15.583	11.42	467	810	1002	3542	146	1.534	2.034	2.669	325	5.93	217.9	4.9	211.7	912	1604	312	15.83	17.83	1.792	5301	3476	152.6
53130	NO	2394	297.79	12.1	92.05	86.95	31.129	27.758	20.955	7.83	543	684	482	1449	14	1.673	2.936	1.737	340	27.01	28.3	9.1	34	1280	2046	308	14.92	9.91	1.612	4296	3302	131.8
53143	NO	3202	272.3	21.8	132.01	162.54	43.832	51.405	56.021	15.41	899	984	79	922	102	2.266	3.849	2.405	645	5.34	137.2	11.8	150.1	1599	2135	528	15.86	14.35	1.803	4373	4639	196.6
53154	NO	951	117.33	20.2	51.46	34.16	9.907	15.114	6.178	6.55	149	256	77	1004	513	0.573	0.904	1.125	216	3.27	190.8	5.2	20.8	1106	909	258	7.82	8.43	1.093	2320	2604	31.5
53169	NO	2101	220.92	13.7	47.48	118.04	48.07	42.697	19.612	6.2	771	794	0	220	2	1.141	1.734	0.944	244	1.97	3.8	1.2	25.3	856	1009	261	17.02	10.32	1.486	2489	1723	57.8
53177	NO	3044	394.48	11.8	112.52	115.1	38.806	41.395	23.902	6.74	540	546	0	86	8	2.398	3.039	1.561	434	4.09	62.8	7.4	41.7	1170	1817	283	20.96	12.82	1.449	5842	2844	182.2
53178	NO	1013	116.06	8.7	43.92	41.98	17.205	13.992	6.598	3.4	481	497	13	180	68	0.78	1.916	0.727	295	2.15	111.1	5.1	52.1	622	784	145	8.32	5.02	0.542	2046	1711	91.1
53182	NO	1021	165.71	7.3	31.26	25.59	7.31	9.524	6.991	3.01	91	136	2	547	1	0.793	1.158	0.742	218	6.18	22.1	3.5	32.7	468	721	199	6.5	4.42	0.681	3007	1559	53.1
53191	NO	1900	201.6	23.2	99.28	80.01	25.621	28.873	15.592	8.95	358	470	85	1209	177	1.697	2.142	1.747	430	6.06	84	3.2	80.6	598	1335	247	16.48	15.4	1.295	3459	2919	145.4
53195	YES	1818	178.89	16.8	86.16	74.24	19.909	35.823	10.921	8.43	403	977	7	6854	40	1.926	2.447	3.911	602	10.79	63.4	4.1	48.7	599	1333	373	19.98	16.1	2.052	2583	2742	133
53199	NO	2588	427.08	38.7	66.63	74.61	25.247	26.011	16.982	5.94	1894	1970	34	699	406	3.757	2.816	2.82	942	1.93	277.1	0.2	62.8	1379	1478	360	38.01	9.78	1.384	3750	2432	122.3
53211	NO	2012	209.69	9.9	129.61	64.29	19.322	27.847	9.439	6.47	77	235	119	1790	115	1.295	1.325	2.62	480	7.15	216.2	2	57.5	717	1420	309	16.8	21.87	1.156	3444	3131	171.2
53219	NO	1204	156.77	13.8	38.01	27.2	11.296	7.416	5.901	2.85	602	750	672	1454	1	1.389	1.804	2.902	555	7.82	8.8	3.8	27.6	417	920	236	37.25	9.07	1.207	1828	1799	49.8
53226	NO	1715	234.72	13.5	71.59	54.04	12.301	20.496	17.098	10.09	337	649	795	3304	0	0.926	1.439	0.895	233	1.86	56.8	3.3	166.7	618	1082	193	10.72	7.16	1.409	5504	3103	86.2
53227	NO	1502	218.47	20.6	47.33	53.5	14.973	19.33	14.868	6.38	98	157	103	577	177	1.087	1.086	1.539	299	2.11	111.4	0.1	31.3	406	823	242	9.29	8.22	1.067	2275	2515	58.1
53236	NO	1901	175.16	3.7	70.97	102.01	30.584	37.671	23.644	4.95	321	327	0	67	4	1.016	1.328	0.966	179	2.26	2.7	1.9	20.6	449	1114	102	9.89	6.23	0.389	2806	986	94.3
53237	NO	1382	133.4	7.2	66.01	65.61	20.271	25.952	13.533	6.59	124	188	26	789	6	1.066	1.855	1.185	274	4.64	17.9	1.5	25.9	440	899	189	11.77	13.02	0.822	2596	2447	91.6
53241	YES	5372	427.13	15.5	186.22	220.91	77.579	79.519	45.09	14.65	929	1047	35	1399	12	2.39	3.636	4.175	775	8.76	85.9	6.4	234.9	1863	2880	509	22.13	20.6	1.472	6276	3797	235.8
53242	NO	2259	283.19	8.7	71.61	95.43	29.143	33.533	22.363	9.62	714	724	13	92	20	1.248	1.43	1.583	306	5.77	48.5	4.7	54.3	770	1319	277	15.47	13.92	1.493	3316	1922	87.3
53251	NO	2032	331.87	7.6	42.31	67.51	22.192	30.89	9.474	3.51	76	272	639	2039	1	1.182	1.567	0.695	194	2.09	117.6	0.8	50.7	382	1035	197	12.01	7.34	1.387	2799	1939	53.3
53261	YES	1830	263.63	14.8	44.77	69.13	34.494	20.056	8.933	2.44	305	388	29	908	129	0.977	1.796	1.098	109	3.73	103.7	5.7	11.7	979	1185	307	7.96	8.36	1.159	1130	3083	49.2
53266	NO	1076	119.83	7.3	57.4	31.33	12.197	10.166	5.922	1.7	85	106	44	154	152	0.547	0.837	1.467	152	1.29	80	0.2	17.4	594	656	163	4.72	5	0.497	1463	1262	59.2
53269	NO	2382	275.34	15.7	109.94	94.54	33.391	37.952	14.918	5.67	283	376	45	1108	0	1.419	1.83	1.919	329	4.05	33.7	7.3	78.2	1158	1595	317	15.24	12.34	1.509	4850	3046	112.7
53273	NO	1281	198.68	13.8	33.79	20.36	10.11	4.619	3.906	3.37	55	84	5	307	126	0.301	0.92	0.831	112	1.01	19.1	0.3	20.5	247	760	191	4.24	4.1	0.81	2605	1748	48.7
53282	NO	1651	200.6	22.6	54.96	69.94	15.785	29.592	20.317	12.14	362	506	0	1703	8	2.16	2.855	1.824	716	3.92	7.7	3	128.1	792	820	330	28.83	7.91	0.914	2645	2910	78.2
53289	NO	1948	175.11	5.7	70.69	106.65	34.054	44.868	18.67	5.38	219	234	1	144	4	1.943	4.092	0.761	331	5.25	5.1	4.7	27.3	786	1310	225	11.71	9.95	0.98	2924	3005	113
53301	NO	1211	180.41	1.7	48.46	32.98	14.141	10.437	5.31	2.08	329	333	0	30	9	0.99	1.224	0.849	187	2.62	0	6.4	8.3	505	851	112	6.64	5.05	0.448	2276	1155	91.4
53302	NO	2757	379.5	28.8	73.3	111.75	26.609	44.003	33.568	8	288	377	77	1038	29	1.298	1.759	3.757	272	2.54	93.3	7.3	46.9	1518	1735	454	9.6	8.31	2.26	6907	4933	66.7
53328	NO	3867	481.18	18.8	137.97	134.56	43.057	52.458	27.136	8.57	243	549	1156	2976	292	2.747	2.694	3.044	670	4.38	369.2	3.4	64.8	1263	1714	386	23.14	13.67	1.481	6322	4315	170.5
53330	NO	1069	144.86	11.7	39.33	39.43	11.182	15.085	8.304	2.99	533	558	120	239	17	1.244	1.5	1.538	413	4.5	25.2	3.9	48.3	610	647	182	16.32	11.03	0.603	1583	1784	58.6
53341	NO	1965	350.49	8.3	33.14	51.41	12.611	22.704	12.632	4.63	162	171	17	99	0	1.502	2.852	0.744	278	0.98	136.1	1.2	48.4	487	1326	190	12.15	4.28	0.741	2906	2947	59.3
53342	NO	1653	194.93	12.2	69.15	70.08	19.763	29.036	15.636	6.84	119	319	615	2015	216	1.115	0.925	1.715	189	2.83	45.3	0.9	52.5	455	781	189	10.06	9.69	1.077	2116	2353	93.3
53352	NO	1393	223.2	20.3	59.43	32.48	12.36	9.46	7.505	3.27	601	618	60	197	0	1.224	1.827	2.135	300	2.03	99.2	5.2	37.6	800	1111	284	13.12	6.52	1.132	1125	2419	79.2
53353	NO	2479	226.99	13.1	81.72	83.56	23.906	34.802	17.016	5.15	3941	3999	14	706	6	2.109	3.684	3.574	863	25.05	69.5	5	71.5	972	1242	389	30.96	21.73	1.496	3693	2261	157.2
53359	NO	1954	209.35	12.2	107.63	78.73	29.054	32.077	9.122	6.04	134	536	1125	4234	28	0.929	1.807	1.474	334	9.71	138.5	0.6	339.3	315	1135	282	13.93	24.45	1.167	1394	3358	117.5
53362	NO	1347	68.69	11.6	59.2	87.51	21.413	33.526	24.619	6.33	168	241	94	847	1	0.688	0.82	1.333	192	3.1	126.7	1	385.4	326	747	161	7.34	9.91	0.711	4708	1887	91.8
53371	NO	1841	143.2	3.6	83.16	47.93	15.166	22.028	5.041	3.4	46	58	3	139	9	1.009	1.624	2.114	308	6.69	7.1	0.5	15.8	282	1005	230	10.88	15.62	0.611	1590	1892	110
53372	NO	2385	283.3	21.7	52.43	120.29	26.536	36.86	51.047	12.49	576	989	1809	4010	69	1.034	1.734	1.537	257	6.44	77	3.9	166.7	628	1002	285	9.5	5.57	1.487	2923	2817	68.1
53379	NO	2573	332.94	24.8	74.87	108.43	47.366	36.308	14.146	6.73	1095	3366	1790	26347	21	1.805	1.648	2.188	413	2.17	122.2	2.5	77.8	831	1134	335	12.62	9.34	2.232	4286	3592	92.7
53381	NO	2633	276.55	10.9	107.81	119.56	44.798	48.369	14.375	6.11	528	569	1	450	10	3.29	3.033	1.047	536	4.71	10.8	2.3	38.9	1367	1545	199	15.31	14.13	0.82	4383	2030	158.8
53382	NO	1797	234.59	23	67.81	75.5	15.442	30.451	24.19	16.48	315	336	19	218	21	1.54	3.157	2.034	439	3.66	41.5	2.3	71.7	567	1157	377	18.11	9.15	1.475	2876	2643	58.8
53385	NO	2299	241.66	10.2	77.37	79.05	18.395	29.987	21.808	4.77	124	144	26	210	10	1.578	1.783	1.737	398	5.09	9.6	1.2	50	320	1739	243	15.69	9.93	1.024	3853	2171	119.7
53389	NO	2495	312.62	21.8	117.15	86.92	21.977	34.002	22.977	7.12	697	730	13	375	4	2.108	2.632	3.456	850	5.99	82.1	4	62.5	761	1521	374	27.03	22.13	1.709	4154	3618	125.2
53396	NO	3351	503.19	21.6	82	117.05	40.25	42.787	24.717	14.39	759	1130	1292	3771	71	2.121	2.541	2.494	521	6.64	102.8	9.8	67.8	1813	1997	425	18.98	15.98	2.273	5875	4092	112.4
53404	NO	1712	173.18	29.7	105.34	72.49	19.126	27.771	20.332	6.9	356	549	441	2034	173	1.372	2.886	2.47	389	3	123.5	5.1	96.2	1265	1757	434	11.94	10.26	1.757	1768	4225	87.2
53415	NO	1406	175.94	14.7	64.22	51.29	14.615	19.183	12.527	4.31	155	498	1332	3401	69	1.067	1.024	2.212	157	1.26	33.2	2.1	40.1	507	976	233	7.66	5.86	0.976	2848	2125	95.7
53427	NO	1499	139.68	19.9	92.26	66.55	22.756	23.144	15.811	7.26	1244	2674	3349	15468	59	1.477	2.322	1.712	446	2.78	150.4	3.4	468.2	1217	1442	364	15.29	8.14	1.337	2436	2665	93.7
53428	NO	1760	198.04	21.8	79.82	56.7	17.372	20.838	12.855	3.78	122	172	59	413	308	1.771	1.834	2.045	424	1.21	236.6	1.4	233.8	859	1155	323	11.89	8.48	1.063	2948	2937	84.7
53434	NO	3206	437.13	30.4	92.64	131.46	49.289	38.909	27.647	10.41	1084	1650	1979	5798	62	2.315	2.783	2.097	720	7.62	29.9	11.7	150	1476	2016	426	33.94	12.75	1.589	4622	2712	167.8
53439	NO	4420	467.97	32.5	166.74	214.71	58.599	77.571	64.134	29.41	387	711	131	3800	85	3.512	3.067	3.248	791	7.64	143.1	1.7	190.3	1097	2065	526	35.56	32.2	2.608	8118	5993	247.6
53443	NO	2758	253.04	17.1	155.87	123.57	36.431	54.565	19.148	8.02	497	583	41	996	9	2.91	2.62	2.859	497	10.97	40.2	5.7	71.6	576	1914	305	20.21	28.84	2.05	4576	3300	232.9
53460	NO	1480	161.77	9.3	64.15	66.06	36.065	18.637	5.216	2.49	734	744	0	87	0	0.898	3.022	0.568	95	6.25	0.4	17.5	8.1	2068	1720	319	3.92	9.53	0.845	1441	2481	73.5
53466	NO	1563	239.58	8.2	33.05	55.62	15.278	19.132	17.303	6.1	89	151	0	737	0	1.199	1.542	1.105	203	1.35	136.3	2.4	19.9	792	728	197	9.9	4.93	0.954	3737	3105	66.3
53481	NO	2038	188.99	23.2	108.8	56.82	17.657	20.449	10.587	8.57	119	708	1995	6046	16	1.572	2.167	2.27	396	3.99	44.9	3.5	206.9	941	1531	381	16.76	14.73	1.564	5878	3950	116.1
53484	NO	1155	162.12	8	61.28	28.94	11.286	11.954	2.887	1.83	267	342	60	844	13	2.107	1.802	1.826	335	4.56	73.5	3.6	48.2	811	981	182	11.2	11.07	0.464	1954	2156	71.6
53501	NO	2520	215.43	10.9	95.81	110.29	44.709	36.014	20.781	7.46	861	888	10	316	15	1.038	2.84	1.289	317	6.03	7.1	7.4	80.9	1752	2092	277	10.24	11.69	1.029	3652	2078	135.8
53504	NO	2138	253.03	11.9	75.34	85.55	19.275	35.539	24.419	9.79	648	734	277	900	2	1.835	2.497	2.174	379	4.68	67.1	1.3	123.2	820	1566	249	17.63	17.92	1.703	4817	2632	102.5
53505	NO	2791	240.98	15.2	100.62	159.17	45.911	74.715	28.711	10.13	359	379	16	236	54	1.675	2.884	0.966	360	4.34	16.4	2.7	81	469	1512	239	14.77	7.32	1.46	5456	2724	136.7
53515	NO	3171	436.34	27.7	116.89	100.98	27.14	40.671	23.929	8.13	348	445	215	826	488	1.838	2.885	3.322	473	5.22	57	0.5	56	605	1775	444	22.39	18.83	1.607	3988	3594	132.7
53518	NO	1654	200.16	31.9	90.39	56.45	11.996	21.206	19.84	7.07	39	86	54	541	1	2.002	1.542	1.642	514	0.91	23.3	0.7	157.5	480	1264	491	11.51	11.48	1.676	4200	2607	98
53532	NO	2647	211.28	14.1	123.34	121.4	40.696	44.392	23.595	9.37	324	393	99	787	1	1.419	2.161	1.934	435	7.95	27.6	2.5	59.4	1282	1929	376	16.31	19.24	1.644	4162	3358	145.1
53533	NO	2034	243.37	10.8	75.65	59.07	18.774	19.651	15.098	5.68	398	466	122	739	13	1.958	2.041	1.811	409	3.24	70.6	6.8	40.2	1636	1449	231	25.32	7.92	0.773	4072	1961	128.7
53534	NO	2803	274.29	15.6	106.23	120.9	46.076	44.387	21.089	6.94	624	691	61	767	79	1.351	2.407	2.031	344	5.38	118	4.5	70.6	1264	1615	298	17.34	16.49	1.075	4619	2626	157.1
53535	NO	3173	409.34	15	127.2	62.16	24.274	17.627	10.93	5.29	350	440	170	909	164	2.315	2.639	2.889	632	3.79	212.2	8.5	53.1	2047	1933	380	14.02	12.52	1.203	3095	3375	180.8
53540	NO	1802	162.02	13.5	100.57	86.39	20.834	32.851	25.975	14.51	266	871	2360	6094	2	1.112	1.316	1.424	370	3.81	75.1	0.9	191.2	796	1720	314	9.44	9.52	1.868	6476	2219	180
53544	NO	961	175.32	19.9	20.35	24.05	4.289	8.471	9.531	4.13	17	54	0	419	40	0.577	0.47	0.664	174	0.23	67.3	0.1	42.1	194	451	146	5.58	3.31	0.733	1172	1169	45.5
53555	NO	1766	189.2	22.9	89.48	73.5	27.772	30.392	8.668	4.33	293	377	35	965	48	1.812	1.731	1.93	124	2.98	24.5	5.5	73.2	746	1336	401	10.24	10.96	2.232	3397	2732	97.4
53558	NO	3396	471.46	26.3	138.11	109.16	44.602	37.9	16.197	11.46	965	1410	980	4660	218	3.065	4.258	3.829	857	10.99	167.7	11	51.9	2039	2651	454	37.47	32.47	2.527	8810	4138	167.5
53569	NO	2983	289.18	12.7	97.45	160.05	58.065	59.829	26.495	9.01	384	426	1	485	15	2.148	2.055	0.757	527	5.54	36.2	3.7	58.5	1507	2076	206	17.45	11.7	1.223	6370	2005	153
53572	NO	3017	284.02	8.5	83.19	111.46	32.989	43.605	21.015	4.71	225	403	761	1763	49	1.617	1.706	1.382	311	3.08	33.1	1	125.8	423	1246	183	10.74	8.45	0.922	4354	2029	107.6
53574	NO	1390	176.02	4.3	48.98	54.52	15.407	18.811	13.278	10.05	618	743	522	1253	36	1.15	1.601	1.672	260	5.19	14	3.7	102	522	754	181	12.13	6.85	0.824	1974	1424	74.3
53575	NO	2877	351.66	22	116.8	115.51	38.253	44.537	22.405	15.22	1088	1146	84	566	151	2.669	2.409	2.215	693	7.8	190.5	8.3	89.8	2149	2016	488	24.04	19.44	2.259	5637	3650	146.6
53577	NO	2688	355.64	21.2	68.25	118.15	32.232	55.716	20.52	9.71	65	111	160	419	111	1.56	1.623	1.875	323	2.48	30.7	1	101.2	371	1449	270	11.68	7.87	1.739	3549	2575	79.6
53580	NO	2634	344.21	28.4	91.21	105.33	35.981	46.435	14.75	4.82	281	509	840	2322	15	2.21	2.201	3.15	335	6.47	50.6	3.1	106.9	890	1919	304	21.61	14.36	2.111	5196	3917	121.2
53583	NO	643	90.59	2.1	35.18	15.67	4.376	5.846	3.644	0.8	28	49	0	246	0	0.171	0.326	0.61	26	0.53	5.7	0.1	17.4	73	312	61	2.15	3.16	0.19	831	590	36.4
53586	NO	1854	202.75	15.9	94.07	76.87	16.558	29.921	23.274	9.6	493	1087	2579	5855	5	1.434	1.847	2.815	323	8.09	56.2	12.3	88.4	620	1856	302	14.99	11.78	0.996	4600	2912	161.7
53589	NO	3508	356.37	21.2	146.69	169.86	50.038	68.064	39.011	14.62	1889	2242	121	4135	132	3.484	4.229	4.63	573	13.5	91	14.4	237.1	1744	2380	403	30.17	20.57	1.416	5660	4227	182.3
53592	NO	2512	187.89	10.1	58.56	73.03	21.968	26.792	18.843	7.67	179	187	0	100	37	0.888	2.44	1.399	261	11.62	23.7	1.1	40.7	617	1007	796	17.76	60.76	5.038	3046	3290	96.2
53594	NO	967	129.99	2.5	47.43	27.32	8.34	10.323	5.645	1.22	114	119	0	63	0	0.655	0.511	0.92	159	0.96	127.8	1.7	12.6	462	629	113	5.69	5.45	0.394	1956	989	64.8
53595	NO	1768	167.89	10.3	61.96	95.23	35.649	35.508	14.623	6.76	485	517	44	330	22	1.649	1.901	1.59	512	6.15	20.5	6.5	34.3	909	1088	197	15.72	14.39	0.75	3193	1883	70.9
53606	NO	2167	243.09	13.8	115.54	78.8	31.276	26.683	14.008	5.34	965	1004	69	484	16	1.609	4.051	2.471	225	8.08	23.1	18.2	49.8	2585	2371	464	9.07	12.38	1.138	4262	3959	179.3
53607	NO	2738	293.92	28.9	67.41	105.08	25.269	37.839	33.853	11.1	558	1737	719	13780	44	2.016	2.796	2.72	449	4.98	141.8	6.5	126	751	1397	393	18.2	9.93	1.726	3400	3541	150.4
53616	NO	1780	192.32	22.9	110.81	30.76	7.965	8.645	9.202	8.48	1045	1829	1588	8593	39	1.544	2.313	3.967	496	2.96	195.8	5.2	97.8	1126	1634	422	13.27	10.31	1.304	3914	4905	153.2
53618	NO	1729	196.61	19.5	51.68	57.1	21.134	18.539	11.908	5.26	426	470	39	468	17	1.09	1.685	1.703	350	3.98	25.2	5.3	45.1	1315	1227	329	9.77	7.49	0.996	2860	2093	71.6
53621	NO	4025	630.91	37.2	135.37	120.2	38.059	43.31	26.059	10.64	515	1002	2284	4590	262	2.7	3.814	4.332	631	8.01	219.8	13.1	66	1789	2336	615	20.56	19.11	2.192	3921	7464	196.7
53622	NO	2025	354.22	12.6	64.6	41.87	17.7	12.477	7.204	5.51	282	575	1077	3000	3	1.098	1.565	1.273	215	3.77	27.9	5.4	46.3	1062	1130	219	12.65	11.26	1.152	3757	2728	82.4
53625	NO	2030	293.26	12.6	68.23	66.95	24.706	22.269	15.026	5.18	920	930	2	108	0	1.609	3.155	2.087	487	6.02	109.5	11	20.7	1458	1606	270	16.32	11.21	1.053	2798	2864	80.3
53632	NO	2208	359.43	6.8	63.74	59.96	19.857	23.418	10.425	3.59	123	187	39	700	40	1.283	3.517	1	238	4.54	177.5	3.9	33.5	1084	1075	259	11.13	13.48	0.831	2578	2745	71.5
53657	NO	3912	543.32	15.1	137.45	134.46	47.27	48.017	24.531	8.27	283	291	0	97	19	3.264	2.155	1.101	703	3.28	2.6	2.8	18.8	1393	1678	349	25.37	14.52	1.723	6163	1533	245.1
53659	NO	1718	257.8	16.7	53.24	54.2	12.322	19.503	11.886	3.63	97	353	1012	2562	2	1.218	0.905	0.731	377	0.85	10.9	1.6	28.6	444	814	218	11.04	5.53	0.968	1268	1634	87.5
53676	NO	1972	155.68	11.6	115.21	84.75	24.687	33.831	17.42	6.4	281	352	77	739	213	1.579	2.215	2.143	268	5.81	31.3	4.9	70.9	344	1337	294	13.55	20.33	1.041	2693	2938	144.1
53678	NO	3762	249.95	12.7	146.83	198.73	56.164	64.601	60.458	11.24	800	837	60	386	93	1.296	2.764	2.998	349	7.36	128	9.9	81.4	944	1909	364	17.1	14.67	1.061	5252	2785	258.9
53683	NO	2212	233.4	15.6	51.01	52.67	16.52	16.547	13.462	9.51	75	233	64	1822	59	1.593	1.624	1.139	533	1.29	96.7	0.2	114.8	563	891	242	12.95	6.83	1.095	3290	2363	99.3
53684	NO	5540	706.51	59.7	219.18	164.9	52.457	53.989	37.627	13.16	446	812	985	3799	178	3.288	3.536	3.734	620	7.35	118.3	0.7	243.9	1937	4294	808	29.28	25.45	3.852	8108	5019	379.5
53695	NO	4692	338.67	9.8	102.77	103.72	26.198	42.313	25.841	6.63	58	223	1071	1453	0	1.206	2.468	4.651	404	3.43	54.2	1.2	52.6	316	1459	526	8.97	9.17	1.384	3833	4115	124.7
53706	NO	3543	463.97	34.4	146.6	123.43	45.639	44.002	25.852	11.15	1239	1400	414	1741	56	2.565	3.232	3.129	723	7.58	454.6	11.6	99.1	2120	2770	525	27.41	15.26	1.984	5936	5097	199.4
53714	NO	2651	316.93	16	90.79	112.24	27.055	38.161	32.894	15.33	304	741	1331	4551	67	2.486	1.848	1.564	504	3.37	20.3	4.8	173	1061	1411	261	17.5	10.44	1.322	5567	2781	186.7
53719	NO	1503	127.77	5.1	153.78	38.34	10.653	12.604	10.111	2.49	71	104	68	347	8	0.899	1.132	3.162	290	2.28	15.3	1.1	29	467	1103	198	12.96	19.66	1.15	3111	1781	174.6
53732	YES	2107	301.12	32.5	43.02	88.93	28.721	28.181	22.821	8.69	569	636	48	695	181	1.045	2.361	1.704	207	2.55	84.5	1.9	51.7	715	1109	320	13.85	7.16	1.168	3668	2314	43.3
53743	NO	3510	225.7	16.1	244.76	178.62	61.345	60.713	33.365	8.36	515	1739	3557	12885	83	3.057	4.071	5.777	573	26.6	199.8	79.3	109.5	1580	3659	567	17.75	17.87	2.452	9205	7036	362.2
53745	NO	1819	201.01	15.1	86.26	73.39	19.493	29.982	17.139	5.82	237	245	3	104	11	2.199	2.211	1.043	287	2.31	4	3.7	31.7	358	1440	274	13.75	11.12	1.026	4725	2794	155.8
53756	YES	1561	217.79	10.5	50.78	57.73	19.634	21.745	11.325	3.86	496	649	199	1719	42	0.789	0.854	1.245	235	2.21	45.8	0.8	66.4	318	705	164	9.9	5.74	0.824	2101	1800	67.9
53762	NO	1749	245.77	20.1	82.51	50.8	18.878	19.168	6.342	2.63	94	116	19	254	17	0.752	1.406	1.594	156	6.27	50.6	3.6	43.6	1068	1679	352	10.92	17.62	1.131	1636	2137	77.5
53774	NO	3173	513.08	20.3	80.24	93.22	24.508	34.099	28.174	6.8	314	596	1106	2784	115	1.701	1.365	2.213	364	1.59	49.9	0.7	80.7	775	1460	247	16.48	7.03	1.373	3925	2552	92.3
53777	NO	2090	239.66	9.9	58.94	99.47	32.323	38.925	19.395	5.46	269	302	22	384	11	1.277	1.675	1.243	276	2.97	12.4	3.3	46.5	731	992	179	11.57	7.71	0.91	2773	1984	82.5
53782	NO	1527	155.71	6.5	42.17	82	33.352	30.996	11.524	4.72	546	558	9	142	11	0.831	1.679	0.488	165	1.67	0.7	3.3	35	487	725	138	5.47	5.44	0.542	1657	1228	70.6
53790	NO	2750	297.5	12.6	85.83	139.84	38.423	52.689	37.955	10.15	265	474	514	2225	64	2.073	2.411	1.514	556	3.53	93.5	4	148.3	875	1333	322	20.56	8.69	1.373	4126	2729	154.6
53794	NO	1890	183.33	8.4	67.33	47.16	12.576	15.831	14.091	3.83	268	728	1365	4838	1	1.331	2.005	2.083	394	1.49	164	2.2	47.7	1006	1132	314	9.94	6.31	1.745	3354	2668	75.7
53802	NO	1850	229.98	13.7	85.8	69.38	29.342	23.836	7.433	4.91	443	474	101	334	8	1.844	2.957	1.427	256	5.27	16	9.1	18.1	1165	1590	345	10.45	13.42	1.408	3260	3329	154.3
53803	NO	1778	318.93	14.8	66.68	27.62	8.176	8.151	8.153	17.68	573	1279	2526	7185	9	1.114	1.694	2.289	337	2.71	177	0.3	67.4	405	731	238	9.86	9.65	1.238	2483	2416	68.9
53808	NO	1945	240.38	19.7	64.56	69.92	24.074	25.305	15.845	8.06	534	928	1530	3878	110	1.366	1.798	2.114	435	4.38	56.6	3.9	48	572	979	275	16.72	11.91	1.134	2299	2705	81.9
53813	YES	1960	184.93	9.8	73.3	85.62	25.715	37.898	15.543	5.69	385	567	701	1787	85	1.271	1.859	1.493	329	3.35	116.5	6.1	60.6	1063	1312	221	11.29	9.29	1.038	5027	2590	120.9
53821	NO	1254	142.95	10.6	49.15	55.34	14.684	17.763	17.983	4.26	164	179	24	155	40	0.782	1.192	1.201	225	1.77	30.2	1.9	58.8	171	602	141	7.66	6.37	0.775	1853	1459	79.6
53827	YES	2089	293.81	16.4	62.46	78.18	28.799	25.588	16.477	7.57	403	824	1712	4142	94	1.264	2.001	1.483	316	2.36	69.8	3.5	41.1	915	1159	261	12.98	6.97	1.106	3204	3353	67.8
53831	NO	2241	283.98	28.5	102.02	86.29	38.671	25.219	15.162	5.75	776	821	52	505	2	2.238	3.146	2.502	1314	9.93	53.7	6.7	42.9	1760	2123	357	44.25	23.49	1.211	4356	3419	108.2
53832	NO	1567	153.62	7.9	50.83	84.12	36.984	29.23	11.817	4.79	618	665	24	525	38	0.993	1.979	0.805	249	2.95	87.6	4.3	29.8	812	859	157	11.35	7.18	0.815	1976	1781	80.5
53836	NO	2712	185.65	9.9	97.13	88.6	26.146	33.302	21.983	7.01	157	178	6	235	18	1.346	1.774	2.626	464	32.46	10	12.6	29.8	668	1762	427	12.07	9.43	0.935	3368	2553	166.6
53846	NO	2599	222.05	12	71.96	107.34	50.689	35.46	13.374	5.52	457	508	49	502	141	2.024	2.401	1.558	387	3.78	162.6	6.3	36.9	1181	1266	296	17.41	10.77	1.207	2931	3067	133.7
53850	NO	2970	195.34	15	115.95	103.87	46.559	36.854	9.83	3.02	265	310	24	483	49	1.149	2.737	2.199	348	9.8	18.6	1.1	56.2	1103	1574	353	12.72	21.14	0.925	3093	2834	111.3
53864	NO	585	101.77	4.5	21.01	11.24	4.677	4.445	0.723	5.28	471	477	13	108	0	0.733	1.021	1.237	184	4.55	246.9	2.5	11.2	261	271	64	12.38	4.41	0.284	546	825	23.2
53879	YES	2331	234.98	18.5	127.39	99.33	48.16	30.622	11.704	4.83	659	813	7	1812	36	2.02	2.343	2.129	466	3.84	139.8	2.7	325.9	1269	1811	340	12.56	13.51	1.28	3764	3042	193.5
53886	NO	1765	257.7	9.8	69.64	52.05	14.072	19.572	12.064	4.82	17	89	141	786	7	1.586	1.019	0.655	464	2.38	39.4	1.2	38.8	505	894	230	15.53	8.46	0.981	4662	1264	159.4
53889	NO	4314	506.72	29.9	171.91	183.85	65.403	64.574	37.382	17.69	1666	1891	85	2582	47	3.766	5.998	4.946	1453	14.89	37.1	12.5	215.3	2038	2667	570	80.34	22.16	2.348	6635	5368	215.6
53898	NO	3216	497.2	19.6	83.5	66.28	10.936	19.561	27.024	14.51	771	1021	605	2056	1349	2.547	1.94	2.435	581	4.7	357.1	5.2	90.9	1038	1663	526	23.42	17.95	2.274	5330	3993	125.2
53906	NO	1473	164.04	4.2	75.56	57.66	18.229	21.895	13.124	5.57	242	272	0	360	6	0.697	1.323	0.814	143	2.4	13.2	1	38.3	819	1010	176	8.53	7.66	0.513	2233	1868	74.7
53914	NO	2167	247.93	8.8	44.48	111.29	48.488	40.322	15.947	6.31	4	21	13	187	18	1.515	1.454	0.453	385	2.26	8.1	0.8	43.9	789	833	175	10.67	6.06	0.659	3338	1311	87.3
53918	NO	2717	365.08	20.6	112.66	94.79	36.818	32.899	13.443	6.55	501	596	141	1031	37	1.889	2.775	1.943	423	6.14	175	8.2	91.4	1720	1753	296	12.54	14.07	1.595	2118	3397	147.8
53924	NO	2821	231.32	1	33.38	6.88	2.191	3.274	0.757	0.19	0	0	0	0	0	0.592	1.469	2.902	489	2.06	0	0	1.9	357	1088	406	4.35	2.49	0.507	716	1831	50.7
53935	NO	2421	303.73	7.3	76.52	99.17	34.462	34.678	23.265	8.23	271	282	9	116	9	1.806	0.935	1.289	420	5.76	0.3	5.1	51.6	1006	1307	173	11.71	7.3	0.705	4184	1120	118.9
53942	NO	1433	143.49	17.8	94.36	54.59	17.854	21.441	9.764	5.65	327	620	1237	2857	35	0.791	2.083	1.883	288	5.91	35.6	3.8	62.2	707	1236	257	13.26	16.48	1.096	2017	3195	108.9
53946	NO	1048	134.71	7.5	54.65	32.9	7.982	12.088	9.282	2.75	80	108	49	311	18	1.003	1.015	1.013	170	3.55	18	1.2	46.1	350	654	151	9.07	7.61	0.669	1553	1389	83.9
53949	NO	1338	145.49	1.4	16.47	8.34	2.596	3.535	1.109	0.63	52	52	0	3	1	0.421	0.71	1.34	198	0.76	185.8	0.3	2.2	158	488	195	3.92	1.59	0.357	515	1662	28.4
53956	NO	2772	470.68	8.7	41.07	86.34	45.736	24.734	9.296	5.03	321	352	7	348	20	1.038	2.545	0.823	198	2.11	222.9	1.9	49.2	410	921	198	10.35	6.6	0.731	2374	3510	57.3
53961	NO	1800	142.76	20	115.54	87.99	36.976	28.996	15.496	5.35	754	923	280	1699	324	2.222	2.251	2.497	369	2.92	185.9	2.7	89.3	2209	1821	408	14.24	12.6	1.452	5495	3612	120.9
53971	NO	1214	189.28	17.3	47.58	31.82	11.326	8.738	9.745	5.62	350	625	995	2626	400	1.172	1.292	1.477	291	3.72	56.4	6	48.3	780	953	233	8.71	5.45	0.877	2238	2161	87.3
53978	NO	1846	336.75	16.9	68.3	28.25	8.209	10.46	7.337	3.22	254	628	1396	3801	3	1.764	1.952	2.303	370	2.38	108.7	5.3	92.4	885	1103	271	10.53	7.67	1.271	2774	3526	81
53996	NO	2232	310.98	16.1	89.24	71.22	28.954	23.189	11.658	29.23	467	534	0	806	5	4.226	4.406	4.195	1053	12.63	105.4	8.7	49.6	2873	1671	283	39.21	32.12	1.185	4719	2809	178.8
53998	NO	2566	228.57	25.1	123.47	127.64	55.111	47.222	16.733	4.71	397	438	6	498	5	1.671	1.613	1.437	515	7.14	12.5	2.9	77.5	1768	2184	303	18.88	19.84	1.078	4783	2526	140.5
54008	NO	2186	195.54	20.2	68.04	86.84	28.229	35.921	16.133	8.72	273	352	38	884	40	1.235	1.334	1.6	447	4.4	41.5	1	111.2	837	1249	302	14.69	21.07	2.071	5010	2842	91.9
54024	NO	1420	237.51	8.4	31.08	40.57	21.15	12.174	4.092	1.91	651	658	15	75	0	1.253	1.592	1.138	460	3.3	13.7	5.1	8.2	676	803	136	11.1	8.51	0.498	1205	984	72
54032	NO	4502	465.93	38.6	212.94	198.36	77.466	69.827	35.404	15.63	1253	1389	5	1543	101	4.714	5.443	2.759	1144	14.37	20.5	4.5	106.6	2423	3382	447	37.35	28.1	2.537	10315	3849	399.2
54033	NO	3113	369.87	40.3	80.26	151.32	48.6	54.916	35.489	10.88	29	47	17	212	12	2.092	1.41	1.43	679	2.7	25.3	0.7	190.7	717	1481	444	18.19	11.06	2.384	3802	3657	113.2
54038	NO	2002	134.97	13.9	69.99	133.77	30.821	47.024	45.278	11.23	153	178	1	311	1	1.115	1.176	0.97	289	1.94	9.3	0.5	117.3	614	1505	221	9.88	7.13	0.814	3993	1818	74.7
54041	NO	2059	263.95	15.1	98.72	68.58	25.62	20.07	16.47	2.96	180	230	37	573	0	1.742	1.574	1.025	479	3.87	5.1	3.2	52.2	1223	1800	206	15.42	8.72	0.681	5142	2156	146
54042	NO	2634	223.34	9.7	144.78	99.18	40.867	39.477	10.784	3.25	156	160	1	48	0	4.002	2.175	2.448	268	4.71	0.5	4.9	19.3	806	2108	297	15.97	16.84	1.281	9844	2655	190.6
54047	NO	2767	428.61	43.7	111.56	72.5	24.742	22.886	14.986	9.65	322	518	66	2272	79	1.797	2.141	3.269	501	2.99	331.3	2.7	121	1389	2174	593	16.2	13.84	2.206	6195	4613	142.4
54048	NO	1533	240.53	14.7	46.64	45.86	18.238	15.77	8.248	3.56	272	385	447	1122	15	0.795	1.265	0.765	375	1.93	10.8	2.1	33.6	318	715	296	12.46	7.4	1.218	2129	2849	84.1
54051	NO	2079	259.49	25.3	88.34	80.11	29.328	21.868	20.015	10.98	1002	1219	46	2476	217	1.944	2.684	4.441	753	10.9	166.5	8.5	279	1084	1477	388	21.36	16.71	1.527	5234	4949	134
54055	NO	4451	434.4	28.8	209.55	208.49	78.187	66.374	47.256	14.51	1441	1893	1307	4747	75	5.765	5.247	4.784	1194	14.52	41.3	9.9	217.4	2483	3411	468	32.64	31.53	1.505	9882	5253	297.8
54064	NO	2433	234.48	10.1	112.49	102.99	28.191	39.586	26.267	6.62	267	288	21	235	7	1.954	2.114	1.898	335	2.81	10.9	4.9	40.2	832	1682	231	14.14	9.65	0.842	4917	2183	153.7
54066	NO	1714	195.13	14.4	66.85	75.35	18.52	27.6	24.15	5.69	113	149	30	384	75	1.673	1.44	1.331	260	3.41	14.4	4.9	63.6	379	857	233	11.47	7.77	1.062	3697	2026	167.8
54070	NO	2168	292.83	19.2	81.15	80.65	28.665	33.672	12.709	2.9	677	971	1314	2883	4	1.777	2.584	1.952	453	5.5	24.2	6.3	68.2	1119	1474	345	24.04	14.81	1.333	2878	2741	94.2
54076	YES	2510	245.62	14.1	98.11	127.22	53.424	36.234	27.632	10.01	509	595	83	982	33	2.748	2.436	1.051	551	3.13	8.2	2.9	143.3	1593	1825	270	15.93	10.95	0.875	4958	1856	152.2
54080	NO	2427	211.78	28	74.35	155.39	40.876	72.255	32.934	27.13	361	399	72	390	24	2.808	2.05	1.694	328	2.35	30.3	0.6	43.2	745	1488	648	13.28	11.22	2.985	1874	3088	58.2
54085	NO	2160	322.15	33.8	77.52	68.3	28.533	20.864	13.278	7.11	625	667	62	432	70	1.76	2.563	2.339	581	5.34	297.3	7.3	51.2	1365	1599	390	38.8	27.59	1.836	4257	4003	94.4
54088	NO	1165	110.82	10.4	65.32	50.64	22.003	18.447	4.919	1.57	138	144	8	64	0	0.446	0.778	0.56	63	1.78	1.3	0.3	7.6	304	482	134	6.19	5.61	0.585	1818	988	69.1
54090	NO	2648	227.02	11.6	134.25	87.3	19.409	29.997	28.295	9.75	955	1432	2001	4675	116	2.073	2.765	4.094	591	15.99	146.2	44.9	95.4	623	2253	331	24.83	9.86	1.137	5207	4852	210.2
54091	NO	1966	240.98	21.5	77.19	74.62	22.68	20.241	26.187	7.23	187	288	83	1142	150	1.274	1.223	2.436	506	4.1	249.8	3	178.9	857	1263	369	11.75	8.7	1.822	2281	2877	134.3
54104	NO	1450	210.39	17.1	52.56	36.72	16.482	11.342	5.731	4.11	429	549	39	1251	262	1.352	2.552	1.702	509	5.25	128.3	4.1	64.8	1353	1228	326	10.55	10.97	1.182	2089	2845	58
54106	NO	1332	92.66	3.9	45.64	87.34	43.699	27.424	10.086	5.97	876	1004	11	1501	28	0.388	1.637	0.595	177	2.79	31.7	8.1	12.6	562	786	115	6.68	4.82	0.533	1788	1013	95.5
54137	NO	2461	191.87	12.2	120.16	120.5	50.464	37.673	17.868	7.17	661	897	0	2741	218	2.006	2.928	1.391	396	7.19	45.2	8.7	165.3	1968	2112	361	14.83	16.69	1.068	5551	3298	161
54139	NO	2814	185.08	23.7	181.81	146.65	52.931	50.351	20.822	7.52	416	720	894	3161	38	3.232	2.098	2.529	340	10.3	59.4	52.2	76	766	2055	383	14.92	18.81	1.121	5242	4732	275.2
54146	NO	1908	282.58	24.4	78.52	44.03	12.876	17.65	8.378	3.08	15	34	18	207	30	1.347	1.034	1.463	293	3.82	29	0.5	26.5	509	1298	332	15.56	15.11	1.272	2212	1920	106
54154	NO	2700	339.93	17.8	80.56	118.05	47.501	42.381	17.269	7.12	836	1026	137	2186	155	1.991	2.672	1.649	360	5.76	146.8	7.4	69.8	1701	1670	273	13.01	10.97	1.515	3717	3411	114.9
54162	NO	3864	582.54	15.1	154.9	106.77	35.559	37.507	21.807	7.59	539	551	0	160	4	1.735	4.203	3.136	318	4.42	66.9	1.8	57.8	1175	2176	348	21.47	19.22	2.199	4668	3968	168.7
54170	NO	1870	213.42	18.4	105.91	63.11	16.186	25.547	13.96	9.22	171	273	47	1177	9	2.088	1.904	2.142	568	2.42	14.8	2.4	69	592	1370	278	16.36	9.42	1.168	4187	2612	215.8
54173	NO	2122	207.88	16.2	115.06	93.8	31.882	34.681	16.802	3.88	254	278	27	199	171	1.997	2.153	2.781	333	3.51	19.4	1.3	47.1	738	1861	280	14.47	12.55	0.965	5158	3648	139.4
54175	NO	3039	511.02	23.4	98.16	70.05	18.827	27.17	19.486	8.54	87	212	91	1444	83	2.312	1.529	2.132	712	4.01	300.2	0.2	82.3	743	1487	359	22.11	17.24	1.759	5145	4148	151.8
54182	NO	2125	234.61	20.2	78.86	88.36	29.398	31.533	22.087	10.2	469	649	32	2139	2	1.669	2.052	2.095	371	5.47	38.1	3.2	75.2	1075	1446	312	9.78	8.23	1.294	3066	2700	91.1
54192	NO	2509	302.4	14.8	116.05	96.52	31.05	34.963	22.007	8.01	654	725	30	864	19	1.763	3.303	2.544	417	12.37	60	12.3	93.8	1554	2116	354	32.72	18.82	1.062	3850	3407	120.7
54196	NO	3094	409.64	43.8	158.03	100.19	19.279	49.313	24.907	37.02	1503	2496	1019	11301	235	3.932	5.355	7.307	1817	22.18	333.7	24.3	785.6	3435	2917	937	31.22	26	3.903	4344	7033	162
54200	NO	2000	231.66	16.7	58.7	95.89	27.283	38.007	22.819	10.77	510	527	22	163	82	1.321	1.785	1.777	294	4.8	100	7.2	51.7	1066	1404	373	12.13	8.46	1.63	2989	2787	83.2
54206	NO	1915	208.93	17.3	88.48	81.62	22.258	28.485	22.574	7.38	125	1358	315	14596	74	2.163	1.776	2.209	403	4.28	151.8	1.9	117.5	438	1070	257	16.12	12.35	1.685	5876	2957	129.1
54207	NO	1323	166.5	15.8	41.34	58.29	20.192	23.037	10.699	6.1	236	327	393	678	459	0.9	0.957	1.333	315	2.47	211.6	0.7	28.1	635	633	201	6.91	5.92	1.158	2142	1846	52.9
54213	NO	3467	526.92	37.8	144.89	98.19	18.798	37.749	30.663	14.15	328	642	73	3603	277	3.591	2.918	4.352	568	13.43	345.2	41.1	143	915	2389	538	17.39	10.12	2.659	5616	5121	236.4
54223	NO	1620	185.33	8.2	30.03	88.99	35.238	32.396	15.004	5.85	529	682	432	1555	121	0.491	0.954	0.541	257	1.04	27.8	2.7	85.8	207	502	123	7.9	4.06	0.626	2914	1015	56.8
54245	NO	1795	217.82	11.6	67.03	41.08	13.379	14.93	8.428	3.01	140	293	601	1547	0	1.514	1.101	1.656	157	0.94	222.6	1.4	32.5	366	859	246	11.28	6.94	0.83	3247	3080	99.6
54251	NO	1763	293.02	11.3	63.84	35.25	7.128	9.295	12.776	7.43	0	644	2309	6436	269	1.501	0.788	2.099	549	3.62	238.3	0.1	103.7	417	812	264	13.91	10.25	1.139	5868	2638	91.7
54259	NO	2068	271.69	19.2	67.17	85.93	31.198	28.966	19.297	6.81	1424	1433	16	101	2	3.4	4.516	3.097	1009	31.67	90.2	12.4	28.2	1461	2424	426	46.89	24.97	1.657	3513	3639	97.4
54270	NO	985	138.38	8.8	49.46	19.14	4.058	6.748	6.437	2.22	31	133	310	1058	1	0.688	0.701	1.296	217	0.5	37.4	0.3	37.3	260	655	162	5.81	3.75	0.46	1965	1310	52.6
54273	NO	2862	475.25	34.5	92.39	76.85	20.375	29.354	20.952	10.54	550	570	53	194	27	2.18	2.182	3.183	444	1.21	42.5	3.5	56.1	1461	1683	500	19.46	11.02	2.064	5540	3256	129.5
54279	NO	3496	502.32	27.5	102.43	128.23	31.996	56.65	29.098	10.21	113	157	27	498	29	2.281	1.942	1.848	485	8.21	39.8	8.3	107.4	879	1934	340	20.27	10.19	2.006	4082	4014	113.5
54291	NO	3293	452.81	20.3	81.44	54.08	19.38	18.933	9	2.54	253	333	20	963	7	1.721	2.468	2.738	356	5.25	39.6	2	65.3	818	1614	370	16.49	15.01	1.404	4082	3857	97.8
54295	NO	1754	263.58	30.4	56.01	59.72	13.52	15.729	25.569	4.56	196	263	109	558	335	1.507	1.767	1.936	420	2.12	215.9	3.7	39.8	755	1104	367	11.19	6.76	1.866	1997	3609	94.5
54301	NO	3330	342.93	29.5	170.98	88.51	22.822	29.774	25.351	14.19	487	530	30	489	42	1.534	2.484	4.497	560	6.59	39.9	6.1	68.1	1146	3082	635	14.46	13.34	2.179	6472	4468	256.2
54302	NO	3212	382.93	18.1	129.44	129.4	43.232	48.621	23.252	7.04	382	729	1271	3509	14	3.134	6.547	11.144	602	13.12	57.7	1.3	103.2	1281	2048	302	19.11	14.66	1.404	6447	2505	167.5
54310	NO	1990	72.94	14.7	93.77	110.1	28.671	50.39	21.976	12.61	267	340	27	869	17	0.673	1.666	1.711	235	5.84	92.2	3.7	33.9	701	1183	399	10.24	19.03	1.66	3243	3287	51.5
54317	NO	1786	217.22	10.2	77.9	54.05	14.543	18.4	16.695	4.07	74	96	30	257	1	2.051	1.233	2.023	227	2.22	39.1	2.6	31.5	695	1179	225	10.15	7.8	0.989	3454	2701	126.9
54319	NO	2142	292.6	16.5	64.31	86.19	30.517	33.087	14.891	5.92	52	114	110	659	48	1.362	4.589	4.842	308	14.42	16.8	1.1	63.7	671	1023	294	11.17	8.87	1.382	4198	2226	83.8
54324	NO	1497	157.02	10.6	69.12	66.13	25.957	20.661	12.474	3.56	251	277	30	283	0	1.445	1.25	1.061	336	2.63	15	0.1	28.1	901	985	161	10.81	7.37	0.709	3054	1309	93.4
54334	NO	1646	232.32	6	68.22	36.45	9.608	14.45	8.484	3.86	143	184	94	438	7	1.296	0.752	1.452	442	15.35	70.8	4.7	25.1	552	1060	217	15.61	39.28	2.199	3979	1617	125.2
54348	NO	765	73.49	5.2	50.28	30.87	9.563	11.044	6.41	2.9	197	221	24	234	80	0.371	0.576	1.309	74	3.05	15.1	0.5	34.2	62	559	108	5.03	8.85	0.368	1330	1146	54.7
54354	NO	637	92.72	11	28.98	16.56	5.526	4.948	3.541	3.44	117	230	16	1346	4	0.83	1.234	0.678	170	1.02	33.6	1	38	342	498	131	6.33	3.59	0.497	1494	1326	58.2
54361	NO	4489	525.6	30.1	135.31	213.54	50.382	82.273	62.493	19.15	779	893	166	1272	71	1.633	3.487	2.837	440	4.17	142.3	6.4	105.9	856	2650	460	20.6	14.7	1.509	4148	3468	178.1
54364	NO	912	101.95	6.2	38.53	38.31	10.366	16.268	8.432	1.97	103	107	0	46	9	1.323	2.595	0.853	216	1.07	11.7	1.1	19	327	526	160	6.72	3.87	0.493	1732	2157	69.4
54370	NO	10463	1012.23	78	240.22	507.32	131.533	208.345	130.159	54.09	680	995	148	3598	118	6.558	4.474	4.933	1959	6.03	285.7	4.6	280.3	2064	4448	1222	54.2	30.58	5.906	14999	9712	259.3
54375	NO	1487	114.42	9.2	77.15	82.06	27.358	34.89	11.666	6.17	483	519	24	342	161	1.498	1.31	1.373	190	2.3	26.2	5.8	48.8	205	861	159	7.41	11.86	0.904	1987	1791	103.9
54386	NO	1903	328.36	14	37.21	28.46	8.029	13.398	5.802	1.7	48	61	15	148	14	1.73	1.179	0.914	496	0.23	155.4	0.2	20	443	850	224	12.88	3.26	0.782	2542	1915	85.8
54401	NO	2239	215.58	18.8	99.27	111.68	43.002	36.512	21.092	8.12	431	575	163	1600	89	1.015	1.483	2.752	211	7.01	60	3	77.4	697	1244	283	12.91	23.19	1.366	3714	3322	86.6
54406	NO	5075	530.18	34.3	206.42	207.14	62.598	85.719	40.283	16	600	2191	2238	17845	283	3.258	3.889	3.494	1130	4.71	304.9	5.7	1164.1	1700	2717	528	28.41	17.97	2.141	7395	4430	280.9
54413	NO	2210	310.57	23.2	88.34	72.99	28.05	22.302	15.131	8.04	879	1315	84	5144	106	1.85	2.847	2.429	554	3.08	145.7	5.3	161.4	1224	1499	373	13.92	9.93	1.743	3755	3755	121.4
54415	NO	6299	831.62	27.8	242.55	232.59	119.859	76.473	24.176	12.58	2609	2652	0	613	2	4.217	10.977	3.174	997	27.31	169.8	61.4	62.4	6408	6062	891	30.91	37.09	2.635	8721	10480	189.1
54419	NO	1920	137.17	4.8	87.86	115.9	28.83	42.725	33.6	4.96	192	211	0	234	2	0.717	1.745	1.309	141	3.08	8.2	0.5	75.4	877	1316	329	8.25	10.87	1.71	1697	2093	79.7
54430	NO	2757	402.74	24	87.16	101.39	37.083	39.96	15.962	8.36	876	1258	1271	3893	11	2.375	2.126	2.546	572	3.81	87.4	1.5	126.4	845	1480	473	22.94	14.41	3.101	3509	3626	135.5
54439	NO	2691	337.6	34.2	121.3	71.75	19.244	29.642	17.45	7.76	56	72	3	191	0	2.453	1.217	2.353	828	3.92	12.7	0.2	56.4	791	1723	402	25.73	17.3	1.704	5017	3411	177.7
54440	NO	4117	481.4	32.1	164.73	141.76	45.729	46.867	38.343	12.95	505	1004	1015	5399	124	3.543	4.073	2.861	943	8.88	39	3.9	295.5	1453	1974	390	28.17	19.71	1.443	7800	3277	251
54446	NO	1623	229.71	24.9	54.74	59.38	26.347	19.02	6.403	6	365	1053	2844	6748	168	1.06	1.817	1.355	273	3.16	51.2	5.4	50.1	609	1003	282	10.74	6.02	1.194	5628	2991	70
54456	NO	2313	215.39	13.8	101.78	116.8	29.561	47.474	30.305	9.65	248	265	0	239	10	2.347	2.076	3.116	254	3.55	60.7	4.4	89.2	436	1394	260	11.32	10.39	1.466	5246	3906	167.5
54470	NO	3032	244.18	13.8	64.02	95.69	30.383	40.406	17.178	5.49	364	447	36	826	272	1.476	2.214	1.364	350	3.15	243.7	4.7	110.1	726	1117	209	17.16	8.92	1.063	2834	2990	93.5
54473	NO	3274	357.12	12.5	168.9	131.49	42.145	46.857	31.156	10.02	731	810	215	766	173	3.374	2.92	4.393	434	6.99	35.7	7.9	71.7	781	2180	335	22.41	15.78	1.399	7480	4259	202.2
54478	NO	2824	255.49	19.4	116.9	149.63	42.622	54.664	38.677	12.66	527	577	124	514	37	2.146	2.227	1.676	524	4.42	8.1	1	90.8	1075	1590	257	16.66	12.36	1.087	4797	1758	161.1
54484	NO	3356	344.08	21	128.35	170.76	39.713	48.296	69.977	53.37	236	256	0	248	0	2.024	2.389	2.346	659	2.81	3.6	0	53.8	687	2817	341	19.13	16.92	3.066	4174	2388	245
54487	NO	2824	319.9	14.5	115.51	122.12	37.735	49.39	24.553	10.15	431	483	41	602	65	2.025	2.393	2.038	390	7.38	96.5	8	55.8	1593	1954	320	14.73	17.41	1.282	5168	3678	134.4
54491	NO	2265	249.38	26.6	91.02	105.22	17.211	31.145	48.096	14.03	75	535	1558	4673	130	1.25	1.268	1.838	379	4.02	47	5.4	168.3	510	1174	437	14.66	11.32	1.583	5145	2987	172.3
54503	NO	2582	367.9	15.3	51.31	45.06	14.702	14.28	10.163	3.13	43	67	13	262	23	1.204	1.057	1.732	363	2.12	28	0.6	25.8	502	942	322	15.86	17.76	1.287	2776	2158	67.1
54504	NO	1521	215.14	14.2	50.49	52.46	14.502	19.935	13.668	4.94	202	284	274	756	186	1.244	1.175	1.975	311	2.08	290.7	7.7	34.9	1569	979	222	10.81	7.37	1.261	2422	3260	77.6
54509	NO	1749	229.4	20.7	78.37	62.87	23.21	22.056	11.375	14.37	580	628	8	576	18	2.5	2.447	5.394	1108	17.14	55.9	1.7	23.7	723	917	237	31.92	15.1	1.254	3434	1770	117.8
54519	NO	2191	251.28	9.3	88.48	87.44	34.839	24.134	20.753	7.82	341	463	99	1312	182	1.256	1.352	1.608	406	2.59	232.9	1.4	97.6	1098	1253	242	10.37	9.19	0.918	3089	2550	98.3
54533	NO	2192	254.22	16.2	108.83	83.23	28.945	33.602	15.256	5.83	466	491	121	255	22	1.374	1.921	3.119	170	8.27	33.4	4.5	95.4	961	1531	292	11.7	17.83	1.175	3660	3734	138.8
54540	NO	2614	312.39	10.4	135.74	89.7	29.957	32.332	19.607	4.2	210	259	60	561	1	2.525	1.563	2.269	589	5.69	11.3	3	44.3	621	1692	305	19.59	19.02	1.503	4911	2585	210.8
54542	NO	1927	192.26	7.7	86.86	73	27.784	26.173	12.102	7.89	248	1072	0	9887	4	1.312	1.537	1.39	572	5.66	15.7	3.1	802.3	764	985	290	18.73	13.45	1.102	3169	2071	120.4
54550	NO	1566	113.95	15.6	89.67	87.78	23.717	38.022	18.938	8.61	89	303	584	2267	0	2.414	1.879	2.336	297	3.08	98.8	2.1	25	711	1139	380	8.81	11.05	1.923	3331	3172	104
54551	NO	4379	546.94	52.5	138.36	153.59	40.273	59.053	44.364	15.27	639	1151	62	6124	35	4.331	5.41	3.396	1209	3.65	203.6	5.2	157.2	1344	2741	665	34.06	16.38	3.158	10144	8324	256.2
54553	NO	2054	338.45	21.9	58.06	45.16	14.785	13.756	12.041	4.92	687	710	13	294	0	2.394	2.711	2.226	578	7.33	247.3	5	62.4	1270	1387	366	22.62	10.94	1.143	2345	2379	78.1
54554	YES	2351	168.38	43.8	98.97	69.81	17.094	26.116	20.379	7.28	542	577	49	289	195	1.616	2.873	3.15	429	9.24	29.1	5.7	86.7	673	1301	201	21.37	25.5	0.873	2325	2138	134.9
54563	NO	1597	138.76	5.9	73.52	71.09	20.441	27.69	16.599	2.9	216	222	8	60	24	1.527	1.288	1.345	272	2.3	14	2.9	29.6	427	960	145	10.31	6.53	0.629	3054	1305	128.9
54569	NO	1651	172.34	11.2	88.55	69.12	22.235	25.412	13.867	6.45	187	235	2	570	3	1.494	1.445	1.318	123	4.71	52.1	2	35.8	768	1456	226	9.36	13.56	0.935	5157	3374	105.4
54575	NO	3263	406.67	42	166.44	115.25	33.445	46.127	26.528	12.37	381	1027	2165	6683	79	2.275	3.459	3.12	543	7.64	125.8	6.7	348.1	1590	2519	486	21.62	18.84	3.042	9105	6676	139.6
54580	YES	1387	241.41	7.8	47.3	28.16	8.994	11.738	4.723	2.37	234	495	1013	2594	56	0.905	1.533	0.633	200	2.68	15	4	46.3	465	769	158	8.84	8.6	0.74	1890	1441	64.2
54589	NO	1197	218.84	6.9	37.69	19.32	2.713	7.52	6.056	4.49	95	117	20	231	25	0.332	0.193	0.635	125	2.05	131.8	0.5	35	231	597	117	3.15	2.93	0.609	2683	1378	71.1
54607	NO	2252	309.95	35.9	120.19	61.45	14.47	22.438	19.193	6.94	157	191	63	352	31	1.505	1.625	2.089	412	6.34	27.2	4	45.9	813	2235	424	17.64	13.44	1.515	3780	3501	166.8
54613	NO	2912	193.72	6.7	116.11	65.99	21.344	25.992	11.582	9.25	520	545	7	283	7	1.692	2.392	3.139	474	6.9	11.3	7.4	31.6	951	2299	550	10.91	11.9	2.201	5648	3081	208.1
54618	NO	4322	524.64	41.8	168.98	136.57	49.788	47.47	25.43	15.84	1083	2311	4817	12245	211	3.981	5.173	5.173	1165	7.91	269.1	6.3	153.3	1873	2759	798	41.78	29.04	3.166	8145	7526	194.8
54629	NO	2242	219.96	16.5	63.34	109.68	41.79	44.323	13.658	12.27	961	981	20	146	214	1.149	1.701	0.989	340	4.88	112.1	6.7	57.7	738	1203	244	11.37	8.9	1	4124	2040	87.7
54631	NO	1479	279	16	38.06	26.98	9.203	11.49	4.185	1.87	556	595	32	311	304	2.254	1.971	1.333	700	4.89	152.8	4.5	11.4	808	967	230	24.5	12.24	0.644	2479	2308	72.6
54634	NO	841	107.04	15.8	65.64	17.2	5.382	6.612	2.829	4.18	102	396	260	2178	2459	0.653	0.643	1.367	265	2.55	43.5	1.1	53.7	397	662	194	11.22	10.72	0.914	1640	1902	79.1
54641	NO	2422	252.66	25.4	66.49	127.59	41.594	60.42	15.467	10.49	515	550	78	245	219	0.765	2.196	1.046	172	2.89	78.7	7.4	13.1	997	1458	383	10.93	11.47	1.054	3121	2174	70.2
54642	NO	2252	313.28	18.7	63.12	86.8	32.968	32.47	13.116	7.3	977	1440	2406	4291	171	1.183	1.461	1.611	280	3.26	190.1	5.7	79.1	1871	1411	284	9.64	9.86	1.29	3503	3245	49.3
54645	NO	1898	170.16	7.3	83.27	87.42	35.585	27.956	16.38	8.16	689	711	8	263	12	1.25	2.415	1.825	248	8.89	38.5	6.6	41.8	1267	1414	199	11.11	13.82	0.672	2313	2067	109.4
54651	NO	3195	249.51	13.6	124.66	175.13	51.507	54.294	53.485	9.49	272	320	15	568	2	2.06	2.062	1.364	503	6.14	7.8	1.5	212.1	1233	1642	224	22.86	19.4	0.973	5095	1738	154.7
54660	NO	2133	230.98	16.2	81.34	93.25	37.78	31.174	15.085	8.02	390	473	43	672	622	1.223	1.521	1.628	269	2.13	181.5	3	55	341	1095	270	10.66	9.15	0.966	3713	2509	100
54663	NO	1204	145.33	6.9	68.08	39.54	9.038	20.189	6.579	5.99	8	47	0	463	5	1.059	0.859	1.026	230	2.68	12.5	0.3	42	167	758	158	11.25	10.79	0.886	2159	1309	94.3
54665	NO	2515	153.24	9.7	121.77	100.42	45.426	30.59	17.23	4.08	606	631	0	303	9	0.953	2.239	2.488	339	4.46	7.5	3.3	22.2	1980	1907	321	11.9	13.12	0.922	3757	1837	145.1
54669	NO	1984	251.65	11.8	50.35	88.82	35.617	30.86	12.478	4.95	277	309	71	282	173	1.177	1.039	1.647	313	2.14	205.4	2.1	42.2	746	877	241	8.54	7.67	1.313	3263	2858	60.4
54683	NO	1950	289	32.9	79.77	58.28	15.95	22.313	14.027	5.67	603	655	66	544	103	1.865	2.651	3.247	444	5.34	87.2	6	35.5	695	1607	360	21.23	13.13	1.17	2902	2937	107.9
54692	NO	2414	326.71	27.8	101.94	82.23	33.079	25.696	14.78	10.19	493	543	30	559	19	2.459	2.022	1.399	559	4.79	45.7	3.3	48.1	1826	1980	556	17.36	11.97	1.523	4133	2544	131.6
54707	NO	755	106.39	12	42.24	18.18	3.515	6.275	5.832	5.44	16	95	28	791	304	0.871	1.172	0.928	278	0.56	142.5	0.2	33.6	362	451	183	4.77	4.7	0.732	1452	1932	77.2
54709	NO	1740	145.59	7.2	81.08	92.93	27.663	35.173	22.493	5.02	328	338	11	112	9	0.935	1.13	1.516	242	3.86	15.7	2.9	67.7	393	1100	164	10.68	9.98	0.698	3315	1709	112.6
54711	NO	3357	353.43	31.1	104.44	130.29	48.225	45.115	24.478	12.1	497	523	83	222	101	1.97	3.095	3.43	857	5.3	30.1	5.5	67.2	1087	1852	518	25.63	14.63	1.776	4007	3554	218.5
54713	NO	2304	248.93	31.1	78.29	113.41	35.685	43.119	24.747	7.78	496	517	21	235	60	1.786	2.016	0.929	386	3.09	1.7	5.2	60.5	1134	1778	279	16.78	10.32	1.078	5161	1797	152.3
54721	NO	1958	283.26	20.2	53.72	29.64	9.221	9.726	7.656	5.06	520	618	205	1030	122	1.706	2.502	3.37	520	5.79	281.9	5.5	72.4	751	1112	341	15.77	12.77	1.18	1573	3792	77.1
54725	NO	2063	233.55	34.4	82.66	92.88	28.279	36.615	20.814	10.03	372	421	20	549	57	1.358	2.163	1.239	406	3.47	18.3	2.2	49.5	1002	1658	391	25.84	33.41	1.849	5470	2840	127.7
54733	NO	2492	242.76	8.7	106.74	93.26	22.948	33.123	29.217	6.26	218	376	646	1560	4	1.35	1.951	2.398	346	1.88	36.2	1.4	126.6	694	1565	228	11.75	8.32	0.594	3820	1910	162.1
54734	NO	1693	248.12	14.7	57.02	56.44	18.186	19.833	14.462	5.55	680	801	294	1236	174	1.316	2.251	1.945	351	6.74	121.5	13.4	52.9	1016	1182	213	7.26	8.98	0.804	2567	2872	67.7
54738	NO	2003	224.33	17	85.04	86.72	35.228	25.094	19.521	9.75	780	855	251	743	70	1.135	2.265	2.639	358	6.43	57.2	4.9	110.9	961	1370	281	13.75	9.73	1.11	4400	3399	91.1
54739	NO	2297	327.88	21	62.56	85.04	30.763	30.051	19.328	6.05	285	336	42	553	63	1.651	1.406	1.004	475	1.48	44.2	0.7	37.7	989	1387	242	15.14	8.14	1.053	3108	2135	94.8
54744	NO	1404	177.59	7.8	38.68	62.07	21.31	24.317	11.206	4.56	1298	1320	7	253	11	1.162	1.457	0.481	219	7.33	7.5	1.2	26.5	615	618	136	12.42	5.84	0.781	2304	1043	64.5
54746	NO	2273	290.08	17.1	96.83	85.47	27.124	30.921	19.233	6.5	513	687	57	1868	374	2.2	2.219	1.844	461	4.73	106.9	8	39	1361	1481	357	14.16	11.67	1.176	4689	3101	144
54760	YES	1735	225.06	10.5	82.35	56.57	18.926	20.118	10.456	17.23	269	350	11	960	6	1.659	1.505	1.824	357	7.97	109.3	2.4	30.4	784	890	206	15.72	18.29	0.965	4486	2364	97.9
54769	NO	1992	228.73	28.8	84.79	87.59	23.348	27.506	29.697	4.13	380	541	484	1687	43	2.105	2.187	2.931	422	2.35	129.1	5.4	40.7	1152	1576	441	13.11	9.18	2.097	3305	3488	117.1
54776	NO	1359	220.68	21.3	48.79	36.68	11.709	13.25	5.98	3.36	453	1122	6	8008	41	1.786	2.446	2.319	352	5.15	77.9	3.1	811.7	558	1152	236	16.51	6.74	0.965	2663	2065	78.1
54779	YES	3514	407.08	24.7	123.03	158.64	55.839	56.351	32.338	12.06	635	957	1038	3312	16	3.228	3.592	1.899	848	5.02	53.2	4.4	108.9	1636	2242	385	24.32	15.55	1.851	6108	3960	187.4
54780	NO	1312	156.56	7.9	35.69	25.76	9.989	10.359	2.494	2.18	48	240	778	1888	74	0.778	0.564	0.932	218	2.29	103.4	1.4	30.1	483	572	136	11.76	7.26	0.883	2316	1590	46.1
54788	NO	1490	203.66	20.9	34.53	62.92	14.497	25.733	18.8	6.08	65	73	35	74	3	1.068	1.656	1.169	303	0.77	30.9	0.8	35.2	442	1006	250	9.35	4.13	1.101	2318	2604	55.1
54790	NO	3398	440.81	21.7	128.51	122.84	23.646	53.481	37.026	15.18	142	188	7	550	7	1.482	5.704	7.859	319	17.47	26.5	2.6	67.4	526	1696	544	18.21	13.92	1.838	5648	3395	123
54794	NO	2594	302.46	19.3	114.37	107.57	39.738	32.784	27.605	9.27	996	1222	746	2272	107	1.959	2.879	2.283	643	6.83	48.2	4.2	150.2	1380	2347	346	25.29	12.56	1.064	5486	3427	146.5
54800	NO	3914	301.45	12.6	122.36	146.91	49.454	60.057	25.018	12.31	567	615	59	533	23	2.486	2.454	3.441	561	4.45	49.2	5.1	50.5	1070	2333	591	14.69	11.84	2.227	5924	4508	149.7
54802	NO	1174	117.81	3.4	56.68	35.87	9.039	13.797	9.509	6.3	193	202	29	115	98	0.482	1.058	1.918	178	1.27	426.8	5.4	27.1	1203	836	236	5.06	3.26	0.678	1452	2112	93.7
54803	NO	2093	252.47	11.9	115.3	53.5	19.624	17.002	8.494	3.2	362	380	60	192	4	0.881	1.43	3.471	198	1.94	31.2	2.3	24.3	717	1542	312	8.71	6.07	0.999	3901	3099	152.5
54808	NO	2920	400.56	37.8	153.28	83.91	30.718	29.83	13.297	14.3	633	993	219	4008	427	1.679	3.433	3.419	611	9.5	287.8	9.2	259.3	1386	2211	529	25.69	24.87	2.116	5056	6636	189.6
54820	NO	3543	462.77	29.3	128.4	137.24	56.049	47.726	23.349	6.49	1119	1189	38	839	10	2.611	3.458	4.666	519	12.01	49.7	7.8	107.9	1416	2147	457	23.25	19.99	1.801	4686	4614	146.9
54825	NO	2152	212.8	16.5	86.19	108	34.332	43.727	21.317	5.42	429	532	366	1089	9	2.184	2.139	1.678	295	2.25	27	2.8	84.4	770	1434	215	34.33	10.91	0.868	4802	2561	113.8
54826	NO	3268	420.2	35.5	115.69	135.78	32.012	56.895	37.835	19.89	841	926	41	997	20	4.131	4.354	4.444	897	11.67	51.9	12.5	60.5	1453	1971	600	34.86	15.73	2.167	3315	4458	160.3
54839	NO	1205	152.43	6.2	38.49	34.5	9.662	9.71	12.484	3.23	210	265	82	560	145	0.766	1.217	1.632	256	3.05	146.5	3.2	61.7	577	675	181	7.72	5.85	0.684	1368	2242	29.1
54846	NO	1546	255.19	17	39.15	45.81	13.419	15.42	10.637	3.78	136	154	12	217	11	0.659	0.719	0.745	157	0.54	43.6	0.9	17.3	604	1128	222	8.27	5.78	0.652	842	949	56.7
54862	NO	1651	233.27	5.1	55.83	55.84	17.759	21.694	11.184	3.94	239	241	0	26	10	0.81	1.494	1.01	209	3.67	12	3.4	16.3	545	827	134	8.93	9.45	0.533	1785	1778	75.1
54863	NO	1713	292.24	26	44.65	47.43	11.922	17.046	13.207	13.06	705	826	19	1392	87	2.054	2.801	2.534	508	5.2	97.1	3.3	80.9	505	898	323	19.47	7.63	1.361	2829	3112	78.6
54866	NO	1243	142.48	10.2	66.67	43.87	8.112	17.904	12.892	9.48	16	124	110	1242	0	1.306	1.535	1.352	263	0.92	5.2	0	67	216	1098	145	9.26	5.63	0.707	2911	1596	129.9
54874	NO	2467	280.59	31	138.7	92.25	28.699	31.186	24.798	10.79	789	1016	112	2693	23	2.133	3.151	2.38	701	8.4	171.1	15	378.6	1628	2341	416	16.12	12.41	1.331	5998	5044	224.3
54875	YES	1554	159.11	5.6	101.54	55.61	22.598	22.367	4.461	2.6	33	924	1	10694	3	0.889	1.023	1.356	165	9.68	54.4	1.3	1070	511	1089	139	14.18	22	0.703	2939	1690	111
54886	YES	2004	282.87	30.4	77.67	55.22	11.77	28.8	10.855	11.48	415	1524	199	13218	39	2.439	2.385	5.765	1112	13.09	461	3.8	389.4	525	1193	467	14.18	18.42	1.709	1857	4896	88.9
54891	NO	3948	414.92	20.3	138.9	104.98	29.99	41.114	23.358	13.29	305	418	106	1101	442	3.427	3.465	4.219	771	5.05	410.1	6.2	67.7	1049	2207	550	16.83	13.68	1.628	4706	5413	235.2
54892	NO	2478	257.71	13.1	75.28	129.3	41.858	43.404	35.635	12.45	379	411	3	379	3	1.876	1.76	1.419	473	5.17	6.3	1.3	68.4	998	1449	207	15.91	9.78	1.121	4989	1993	133.5
54900	NO	2714	332.09	14.9	97.35	110.86	41.259	41.701	18.02	7.38	658	810	10	1807	24	2.816	2.683	1.173	573	3.9	227.2	5.3	170.7	1646	1612	265	19.65	11.75	0.854	3736	2499	175.9
54905	NO	1858	290.28	17	81.46	43.4	15.692	12.779	9.975	3.84	244	329	217	572	691	1.939	2.048	1.432	453	2.11	135.4	6.5	24.8	1565	1466	285	12.17	8.27	1.017	2613	2461	110.6
54920	NO	3214	449.52	18.2	144.44	97.08	25.899	35.332	24.633	7.58	195	283	19	982	129	1.913	2.436	2.909	458	4.32	165.6	0.8	269.9	982	1501	512	18.94	17.16	1.713	5834	4118	160.5
54923	NO	2724	341.72	23.1	111.38	85.7	26.855	28.36	22.627	7.23	265	583	1282	3161	36	4.276	3.112	2.013	587	2.98	61.7	4.9	181.1	846	1622	389	19.08	12.96	1.509	6199	3262	192.5
54932	NO	1925	177.04	5.9	50.88	47.55	17.324	18.466	9.43	4.37	317	348	11	362	14	0.997	1.491	1.582	390	1.6	43.7	2.8	28.4	849	1104	242	8.81	4.89	0.831	2487	1424	91.5
54933	NO	2735	386.42	9.6	98.17	91.79	20.233	35.551	28.964	12.47	375	445	21	821	30	2.159	2.654	3.689	487	9.93	153	2.9	86.7	454	1253	243	28.2	14.51	1.026	4294	3499	136.4
54935	NO	2843	372.46	20.8	78.43	119.79	43.736	36.9	32.254	8.77	473	506	64	357	66	1.857	4.706	1.407	451	5.59	97.6	0.7	76.1	1112	1430	320	18.59	13.11	1.426	2907	3458	110.5
54936	NO	3068	403.41	20.3	100.78	120.68	33.096	47.65	30.611	14.45	1023	1116	87	1035	50	3.592	3.998	4.216	785	11.26	28.8	6.7	112.8	993	1783	489	29.86	13.01	2.683	4886	3129	209
54943	NO	3325	299.75	22.4	171.98	149.47	36.202	53.811	45.034	16.09	698	746	31	527	15	2.127	2.977	2.934	661	4.58	9	10.8	126.9	1417	2129	413	25.09	14.06	1.571	5221	3797	200.5
54957	NO	1682	193	16	76.73	52.96	12.896	18.08	17.209	6.61	547	1276	2837	7330	3	1.81	2.532	2.613	418	4.61	36.5	6.2	103	750	1176	291	9.52	8.41	0.988	2207	2929	103.7
54972	NO	1492	192.29	17.3	70.4	50.66	13.569	20.686	11.035	6.68	103	564	731	5138	33	2.188	1.593	2.023	353	3.59	243.2	1.7	61.6	429	1150	279	11.27	12.29	1.245	3377	2965	94.5
54974	NO	2087	252.54	8.3	58.34	95.79	36.926	30.977	20.488	4.84	764	800	26	389	97	1.838	2.156	1.607	432	7.14	112.4	7	34.2	1435	1134	209	15.91	9.99	0.679	2280	1900	78.5
54983	NO	2484	239.92	10.3	106.4	122.06	39.776	46.592	24.045	9.51	1006	1040	93	356	30	1.372	2.635	2.766	216	4.54	40.5	3.2	88.9	819	1629	215	13.98	10.07	0.695	4417	2497	127.3
54989	NO	2741	336.58	29.8	130.66	99.55	31.323	42.09	14.751	4.94	121	403	1108	2810	77	2.327	2.254	2.711	462	7.93	160	2.1	53.9	630	1813	454	27.86	34.79	2.59	6369	5326	130.7
55003	NO	3113	470.18	10.3	51.71	119.37	25.933	37.846	46.398	15.6	986	1027	28	497	10	1.855	2.067	2.649	497	8.13	90.4	6.4	58.6	668	1014	214	14.38	10.98	1.15	3072	1458	87.4
55004	NO	2003	290.88	30	67	67.13	14.928	24.591	23.319	8.59	240	336	104	1117	3	1.941	1.876	1.58	444	3.17	69	5.5	235.3	971	1261	315	13.96	9.22	1.697	5011	3225	91.8
55006	NO	3360	451.03	21.1	73.78	148.25	46.476	63.511	24.916	14.62	434	451	58	97	173	1.953	2.664	2.376	491	4.19	194.9	4	10.1	818	1538	492	16.93	19.43	1.556	3448	3665	69.7
55007	NO	2583	422.11	34.5	66.18	76.7	22.123	23.761	19.652	6.7	426	510	182	922	10	1.729	2.179	2.321	354	3.89	53.4	8.9	51.5	1517	1797	505	13.5	9.34	1.451	2414	3338	103.9
55017	NO	1548	231.74	27.9	81.99	36.52	11.323	12.737	8.836	3.84	451	712	100	3068	102	1.352	1.79	2.548	403	4.54	198.4	3.8	182	772	1316	431	17.51	12.97	1.321	2765	2803	78.2
55018	NO	2138	216.62	19.2	53.6	71.92	14.787	34.891	17.486	9.77	26	924	2485	9525	1	1.996	1.183	1.062	569	0.62	54.9	0.3	386	545	773	270	13.57	6.23	0.905	2673	1963	123.4
55019	NO	2402	209.21	13.5	136.75	111.52	35.811	42.618	24.559	9.22	732	996	984	2679	29	1.586	3.596	1.719	436	7.74	23.9	9.3	66.3	920	2154	281	21.8	20.8	1.127	5579	3007	211.1
55020	NO	3161	535.48	31.2	69.41	89.54	26.244	37.345	18.623	11.09	373	446	80	788	59	2.086	2.538	2.952	1095	2.64	30.7	3.7	68.7	1163	1506	373	35.24	18.05	1.657	5312	3660	83.1
55026	NO	2033	301.52	15.9	66.3	63.9	22.984	23.6	11.809	4.56	435	546	532	719	741	1.451	1.678	1.694	400	2.15	59.6	4.7	29.4	729	1034	320	11.3	8.12	1.334	2846	2887	99.1
55058	NO	1936	261.52	22.5	91.74	61.83	13.274	26.003	17.783	9.3	105	829	2437	7324	297	1.11	1.384	2.082	299	1.05	143.5	7.8	181.4	633	1307	329	10.18	7.83	0.992	2298	2641	113.2
55059	NO	2358	250.55	15.1	88.52	113.03	27.492	41.105	33.719	10.08	251	362	88	1278	15	1.594	1.674	1.427	461	3.63	21.3	0.6	164.6	539	1020	218	17.24	11.87	0.964	3902	2519	120.7
55063	NO	4345	505.21	36.5	179.43	178.87	60.58	63.355	44.567	18.44	755	777	30	243	1	3.211	4.081	3.428	649	13.17	20.1	10.4	110.1	1698	2354	569	28.16	39.82	3.795	4730	5811	193.4
55069	NO	2171	238.1	14.9	94.81	95.26	28.725	38.245	20.454	10.39	394	560	458	1784	4	2.26	2.243	2.322	292	3.93	163.2	3.2	82	365	1392	276	15.59	17.24	1.39	6033	3416	116.1
55079	NO	2245	228.54	17.7	84.75	109.8	31.424	40.599	25.817	15.09	412	515	4	1210	14	1.821	2.543	1.674	446	4.16	30	3.6	76.9	716	1270	246	16.62	9.73	1.536	4441	2638	208.5
55091	NO	642	107.43	9.3	22.34	13.95	4.059	4.399	3.714	0.75	128	131	0	36	0	0.689	1.415	0.215	87	0.89	0.4	2	9.8	353	547	179	4.98	4.3	0.429	948	1106	40.9
55092	NO	3809	476.41	17.7	165.78	139.53	61.116	47.549	15.921	6.26	701	1025	794	3481	17	3.414	6.798	3.428	658	3.5	110.2	9.7	68	1993	2751	489	21.29	13.25	2.071	6435	5902	256.6
55094	NO	3485	369.95	20.4	106.45	147.18	48.521	45.072	43.925	13.05	954	985	23	350	67	2.539	2.926	3.188	782	7.95	146.2	7.9	49.8	2182	2106	477	31.05	22.94	1.376	5447	4045	135.8
55102	NO	1760	252.14	10.9	83.4	49.12	16.032	19.227	9.941	5.88	1784	1784	0	9	13	1.953	4.114	2.125	428	8.78	13.5	17.2	5.1	2054	1981	322	19.73	12.13	0.965	2029	3007	112.5
55114	NO	1387	130.88	10.8	70.75	63.59	16.667	20.453	20.822	5.83	332	530	730	1999	17	0.879	1.257	1.22	250	2.62	35.3	4.5	89.7	622	855	193	9.88	7.18	0.955	1882	2098	65.4
55120	NO	665	73.65	4.8	11.72	10.89	1.743	3.834	4.644	2.14	13	395	1554	3814	1	0.15	0.29	0.638	130	0.23	30.8	0.1	76.4	155	273	98	2.03	1.62	0.306	968	658	18
55126	NO	3537	317.79	33.9	168.16	146.05	36.069	59.092	38.847	16.3	284	327	55	326	331	3.023	2.174	3.569	751	2.86	225.6	2.2	40.9	793	2086	602	16.28	16.41	2.584	6256	3856	242.4
55161	NO	1037	184.49	20.2	41.17	18.84	5.684	6.266	5.182	2.45	273	377	45	1249	12	1.187	1.423	2.279	326	4.35	44.8	3.6	89.3	571	1035	266	13.87	8.29	0.838	1131	2132	42.5
55165	NO	1531	227.51	4.1	40.82	53.36	18.097	24.192	7.601	2.42	63	134	266	686	63	1.235	0.803	0.46	260	1.66	69.3	2.7	13.2	670	1004	87	9.8	4.46	0.892	3402	1150	67.4
55177	NO	381	83.07	1.3	4.64	4.08	0.9	1.011	1.831	0.5	0	0	0	0	0	0.275	0.149	0.027	63	0.04	0	0	6.9	109	102	41	2.88	0.77	0.375	643	82	3.4
55189	NO	2452	256.49	13.8	101.36	106.06	42.184	44.41	8.62	3.44	504	677	605	1781	47	1.861	3.104	2.063	404	9.75	29.5	10.3	70	1669	1928	316	30.43	16.07	1.116	4653	3563	100.7
55193	NO	944	129.17	8.3	44.28	27.5	6.865	11.48	6.635	3.63	289	603	1267	3150	0	1.331	1.23	0.866	364	1.67	28.7	1.7	61.9	231	556	119	11.39	4.36	0.56	1695	880	94.2
55196	NO	3389	423.95	31.3	161.21	123.36	46.979	44.777	19.967	8.2	933	1007	123	866	29	2.024	4.276	3.067	420	14.23	68.4	17.3	69.3	2687	2860	536	24.94	39.77	1.861	4844	5573	171.4
55198	NO	1874	78.01	2.5	98.34	69.05	24.812	31.572	3.819	18.3	2	1223	2466	13444	1	0.348	0.595	1.966	68	5.61	295.9	0.8	37.3	175	770	108	7.78	17.56	0.493	2679	1554	104.2
55208	NO	1907	89.53	6	80.18	84.33	32.472	33.484	13.446	2.55	37	59	21	222	7	0.974	1.48	1.293	309	7.82	1	0.9	54	299	974	206	13.02	15.27	0.792	1854	1556	106.4
55212	NO	1880	230.28	9.3	55.58	81.76	33.051	32.824	7.735	2.42	407	416	13	73	40	1.568	2.723	0.921	214	2.48	48.5	4.4	17.7	874	1567	156	8.25	7.97	0.508	2766	1836	61.4
55228	NO	3011	319.09	23.3	109.13	143.09	54.338	55.279	23.339	6.84	301	306	0	47	9	2.501	1.826	1.533	621	2.82	80.5	6.7	52.3	1156	1886	365	19.29	12.45	1.744	5029	3645	204.8
55241	NO	5049	676.89	30.4	184.06	186.29	53.699	72.633	45.597	14.45	1252	1514	684	2782	108	4.089	5.608	4.698	1453	10.97	209.4	10.4	173.5	2138	2554	570	58.02	39.62	2.765	5982	5088	228.9
55244	NO	1124	129.64	10.1	47.83	17.19	3.166	6.577	6.509	2.94	0	0	0	0	0	1.163	0.77	1.144	363	0.65	0.2	0.2	18.4	248	645	206	9.65	4.5	0.692	1415	1468	72.2
55254	NO	2884	328.35	26	154.3	108.51	31.576	30.99	34.725	15.22	723	887	107	1881	71	2.009	3.282	2.144	460	7.47	102.2	9.9	168.2	1507	2412	442	18.48	14.24	1.836	6141	3371	276.7
55256	NO	2048	141.51	8.8	125.25	107.01	27.567	36.103	29.972	9.02	194	564	1414	3700	66	2.475	2.199	2.338	248	5.76	51.9	4	174.6	457	1416	205	12.03	17.6	0.859	5175	2609	191
55260	NO	1527	165.42	7	56.39	72.73	28.224	26.487	11.766	3.89	240	267	11	331	14	0.549	1.163	1.051	116	3.62	8.8	1.4	29.6	655	1039	155	7.48	10.74	0.561	2594	1512	51.6
55268	NO	1943	238.37	26.9	86.54	75.31	29.447	25.808	13.806	7.77	623	761	134	1422	410	2.961	4.116	3.723	662	11.64	73.1	5.6	76.9	773	1342	393	30.45	30.26	1.529	3130	3635	103.2
55272	NO	1087	138.84	18	55.57	38.29	11.664	14.591	8.372	3.85	228	489	986	2544	198	0.935	1.361	1.047	288	4.29	116.4	4.4	32.4	591	932	223	6.56	8.19	0.8	1802	2210	58.5
55273	NO	2670	266.37	10	67.92	105.17	33.905	40.754	15.289	3.97	0	37	23	400	42	0.854	1.427	1.694	297	5.24	60.3	2.3	20.3	656	1131	459	12.52	12.6	0.949	4646	2027	81.5
55276	NO	1511	168.17	18.5	73.45	65.18	16.334	28.54	14.6	7.48	128	153	44	211	157	1.362	1.284	1.479	361	3.01	150.9	1.4	16.4	363	903	287	11.76	11.47	1.279	3601	2079	91.9
55280	NO	806	138.41	4.9	24.8	17.43	5.219	7.018	3.065	0.8	26	42	0	171	10	0.848	0.786	0.486	190	1.06	4.5	0.6	7.3	157	423	76	6.47	4.06	0.395	1709	789	40.4
55282	NO	2150	278.84	16.7	95.73	72.97	14.326	22.053	31.309	7.18	73	136	18	707	56	1.893	1.586	1.73	281	1.59	83.7	1.5	112.4	506	984	235	12.41	8.13	1.289	4348	2523	117.2
55292	NO	2005	165.73	10	81.6	111.2	41.386	42.789	15.674	4.02	216	220	0	43	5	1.65	2.237	0.96	326	5.77	4.2	2.5	19.6	1019	891	195	14.89	14.06	0.773	2588	1895	122.3
55316	NO	2677	261.84	15.1	108.88	119	38.151	44.902	23.798	8.78	254	306	55	560	76	1.765	2.096	2.244	484	5.44	60.1	3.1	55	775	1536	376	19.05	17.1	1.718	5641	3704	123.7
55323	NO	2771	266.22	12.6	86.3	97.3	37.163	31.927	21.015	6.31	835	890	36	649	92	1.947	3.248	1.731	340	5.42	130.1	16	56.7	2132	2011	319	11.92	10.63	1.193	4611	3481	121.8
55324	NO	1212	118.45	17.6	77.77	51.07	12.691	14.96	17.693	7.79	80	1447	216	16273	17	1.171	1.879	1.528	655	0.95	115.2	0.5	1345	717	1023	417	15.62	8.53	1.368	3943	3011	106.5
55330	NO	1335	209.85	27.1	71.24	24.67	3.776	7.803	10.365	4.07	48	124	41	432	956	1.644	1.01	1.073	388	13.32	292	7.2	30	873	1339	335	12.61	6.75	1.433	2201	2807	135.4
55331	NO	1978	253.75	12.7	54.77	83.15	31.016	30.403	15.33	5.4	626	635	0	100	1	1.459	1.937	1.394	190	2.68	103.9	1.1	31.6	907	1159	207	9.65	8.08	0.824	2640	2177	77.6
55336	NO	3562	446.29	30.4	137.25	141.4	62.98	48.222	15.861	10.88	636	956	223	3084	1259	2.917	2.834	3.072	1205	4.03	702.2	2.5	292	3404	2031	532	18.42	18.36	2.496	5846	6271	143.7
55337	NO	1532	227.17	15.3	48.75	49.94	17.339	18.372	10.555	3.63	182	199	53	130	96	1.325	1.243	1.248	402	1.73	129.2	6.9	24.5	1609	1127	243	10.19	5.05	0.885	2385	2417	73.4
55353	NO	2528	253.45	12.8	132.62	108.37	45.605	38.311	12.563	6.24	279	347	34	795	14	2.094	2.004	1.652	463	9.48	50.1	1.1	44.5	1345	1704	273	21.76	23.53	1.335	5725	2207	154.6
55356	NO	4866	306.44	4.5	132.48	164.36	62.035	63.619	19.551	4.85	470	494	3	270	4	1.71	3.223	2.956	400	5.49	87	5.4	51.5	871	1963	364	13.08	13.67	1.328	6043	3949	176.8
55367	NO	1827	135.51	21	48.07	75.21	13.359	20.171	36.903	9.72	211	603	124	4544	233	1.021	1.838	1.648	329	2.28	63.9	4.1	273.7	747	1121	343	9.69	8.36	1.826	2289	3758	54.3
55368	NO	2410	343.09	18.4	113.55	53.36	13.173	19.726	15.129	7.59	399	448	90	542	38	2.581	1.996	2.051	726	9.61	29.3	15.6	64.5	680	1714	331	22	11.39	1.642	5320	2470	270.9
55405	NO	1850	339.66	16.5	28.65	49.02	23.016	16.136	6.499	3.55	317	340	38	207	97	0.672	1.4	0.935	218	2.08	118.7	3	26.3	837	742	180	6.47	4.73	0.669	812	2006	36.3
55406	NO	2793	351.39	21.7	91.14	72.65	18.294	27.629	20.378	8.77	325	418	14	1035	196	1.478	2.391	2.705	656	11.68	67.8	2.3	49.6	1142	1689	389	15.61	12.12	1.522	5292	2621	111.5
55411	NO	2160	284.65	17.1	79.83	72.19	28.956	27.787	9.126	3.25	209	240	48	339	3	1.098	1.182	1.332	185	5.24	9	3.4	34.6	1247	1714	311	11.15	13.92	0.998	3027	1864	87.8
55413	NO	2435	263.39	12.1	75.77	65.21	18.139	24.813	14.572	8.51	162	281	220	1309	4	1.622	2.027	1.718	341	1.7	6.3	0.9	68.7	554	1179	247	18.41	7.11	1.133	3823	2865	117.8
55416	YES	1413	236.66	26.4	65.31	30.66	9.561	9.739	8.299	3.09	224	321	21	1134	43	1.897	1.93	1.269	271	2.61	58.9	5.6	50.8	645	1175	275	10.94	7.84	1.35	3336	2802	176.4
55423	NO	629	101.6	18.2	39.38	9.08	4.148	2.586	1.483	5.49	135	1130	20	11914	67	1.019	1.764	1.084	533	1.43	103.2	3.1	942.4	716	709	347	13.73	5.81	0.992	1552	3037	28
55426	NO	2363	322.12	27.5	88.2	90.05	23.23	34.581	24.925	12.21	285	315	2	322	55	1.516	1.504	1.378	324	1.17	92.3	0.9	60.9	922	1304	416	18.77	18.96	2.419	3596	2904	93.6
55438	NO	3149	354.55	20.1	104.12	126.84	43.407	41.309	29.804	9	424	571	437	1533	27	1.829	2.33	2.744	440	5.31	102.3	1.4	127.3	991	1578	332	15.38	13.24	1.373	5351	3517	146.5
55451	NO	1689	172.86	8.6	99.33	40.82	16.273	16.196	3.387	2.35	194	220	51	256	101	1.823	1.861	2.94	278	5.23	159.1	4.1	14.5	593	1431	292	7.9	12.29	0.906	2578	4030	126
55464	NO	1339	189.59	7.3	45.96	45.17	8.27	17.751	14.557	2.37	18	36	31	206	1	0.796	0.503	1.236	164	0.56	8.2	0.3	28.9	259	666	113	7.05	3.49	0.441	1379	1423	53.9
55466	NO	2643	206.79	26.7	116.59	145.61	41.4	60.926	34.706	14.41	171	198	41	285	0	1.397	1.531	2.632	527	2.04	12.7	5.5	37.7	727	1729	484	11.48	9.54	1.657	3091	3394	118.9
55473	NO	1997	179.78	12	90.14	69.4	23.146	24.657	14.164	5.78	175	212	40	417	1	1.854	3.236	1.905	432	5.61	60.8	4.8	34.5	1355	1540	349	14.12	15.51	1.295	3626	4107	127.5
55478	NO	1645	151.41	11.5	90.25	60.72	22.28	24.713	9.702	6.7	261	404	4	1603	241	1.044	1.377	1.404	265	4.78	35.2	2.9	92.3	1051	1445	289	10.56	7.95	1.074	4116	2833	133.9
55495	NO	1852	177.25	1.4	112.98	67.88	27.461	25.053	7.131	13.64	577	582	1	81	0	0.788	1.781	2.279	216	9.79	78.4	5.1	32.4	1145	1359	219	9.52	21.92	0.664	2072	2089	114.7
55496	NO	2649	330.21	22.8	119.83	97.09	39.216	30.547	19.201	8.95	763	1305	1919	5408	260	1.83	3.311	2.318	506	5.62	137.5	7	114.4	1475	1862	373	15.71	14.51	1.55	4115	4540	123.1
55498	NO	1407	154.21	8.5	54.97	64.28	26.583	25.606	6.824	2.58	484	494	10	107	29	1.498	2.708	1.929	336	6.99	47.6	8.4	11.6	750	873	174	18.35	7.23	0.623	2307	1833	71.5
55502	NO	5187	365.49	10.8	158.99	142.9	58.524	50.084	22.346	7.91	555	582	15	325	21	1.798	3.166	4.943	579	9.55	19.6	3	50.4	1326	3060	581	12.36	16.03	1.299	6177	4317	196.2
55508	NO	3709	350.91	25.9	165.49	179.45	48.283	69.92	42.846	23.75	478	625	17	1733	27	4.907	5.001	5.846	992	14.25	54.9	8.5	126.3	859	1877	468	40.92	35.01	1.923	6826	4699	247.8
55514	YES	2531	291.68	9.4	67.73	123.34	31.178	40.091	42.79	13.13	673	746	142	789	3	1.692	1.901	2.551	474	4.88	53.9	3.5	134.6	400	893	197	21.74	7.39	0.814	3510	2105	88.8
55526	NO	1150	157.28	8.8	33.28	43.26	12.578	18.293	8.445	4.71	19	1290	5216	12639	0	1.029	0.697	1.459	171	8.88	11.7	0.6	44	217	418	94	9.28	5.02	0.534	1862	1252	49.6
55527	NO	2610	327.71	20	87.84	101.39	26.309	35.419	30.825	12.92	417	945	1452	5587	55	2.063	2.501	2.852	556	1.65	228	1.7	399.1	869	1823	273	14.22	9.24	1.141	5923	3293	116.9
55530	NO	2766	280.48	23.4	164.76	111.53	25.273	37.425	39.265	11.07	191	234	23	406	200	1.902	2.909	2.63	364	14.05	118.9	18.6	114	746	1857	362	20.73	13.18	1.277	5011	3866	373.4
55533	NO	1835	257.16	12.6	55.49	68.49	24.907	21.981	16.198	8.22	209	260	4	614	2	1.297	6.099	6.424	442	19.82	21.4	0	59.6	1151	1088	159	12.36	6.32	1.215	3886	1106	95.2
55552	NO	1801	284.92	29.1	79.46	45.02	14.582	16.993	8.472	4.3	630	749	102	1342	71	1.816	2.35	3.332	401	8.02	148.6	11.2	69.8	976	1729	372	19.31	10.51	1.28	2499	3853	197.6
55555	NO	2076	283.67	19.1	63.91	80.29	21.207	29.625	21.094	6.98	517	623	161	1091	149	1.372	1.581	1.085	360	2.68	103.5	3.9	89.6	981	1271	281	11.71	8.28	1.183	3902	2066	102.3
55559	NO	2269	244.33	7	97.37	36.58	11.907	15.481	4.253	1.9	24	25	0	21	2	0.35	1.091	1.991	161	7.25	1.2	0.7	12.9	235	1400	273	9.34	16.77	0.564	1235	1654	88.2
55560	NO	2173	283.6	27.6	101.02	74.93	22.318	20.347	21.92	11.92	629	1018	1297	4046	35	2.326	2.316	1.924	390	8.1	289.1	18.4	178.6	1466	1970	443	14.68	14.82	1.751	3735	3990	142.1
55563	NO	2327	465.49	24.2	40.55	44.6	7.998	14.934	17.204	11	103	162	54	657	180	0.922	1.363	1.791	255	0.86	648	2.6	39.6	1165	919	494	9.19	6.41	2.036	1107	4451	71.3
55567	NO	2502	358.84	12.2	112.97	66.81	18.706	22.389	20.066	4.1	738	746	0	116	2	2.06	3.318	1.464	539	9.91	5	12	52.4	1686	1367	357	18.58	10.71	2.65	3726	2344	168.9
55578	YES	1171	144.78	8.8	48.52	45.14	16.741	13.788	10.908	4.41	248	339	18	1100	8	1.272	1.523	1.315	358	2.78	16.8	3.4	87	720	813	150	12.01	5.02	0.544	1930	1257	76.2
55592	NO	2079	251.14	16.5	69.68	89.96	35.229	33.647	15.699	6.73	690	730	0	489	0	1.463	1.555	1.551	236	4.3	31.5	3.4	62.7	1557	1252	285	19.65	9.14	1.394	4667	2600	83.8
55593	NO	2082	201.86	24.6	63.69	85.47	30.471	28.619	21.476	10.08	303	556	520	2679	132	1.766	2.328	1.927	471	2.03	152.5	0.5	104.8	1068	1342	368	12.48	8.7	1.505	4452	2824	112.7
55600	NO	2052	247.3	23.2	113.66	45.8	8.791	12.86	19.296	8.88	622	877	75	3016	9	2.979	3.347	3.12	588	5.79	64.8	8.9	104.6	1436	1845	418	20.3	14.48	1.505	4009	4125	202
55604	NO	3630	425.1	28.9	132.44	160.75	57.773	60.204	28.696	9.94	391	518	77	1343	295	1.486	2.058	1.911	380	8.59	27.5	6.6	79.9	2255	2617	351	23.21	23.02	1.322	7582	3635	129.9
55616	NO	3693	404.69	13.5	73.73	94.17	16.348	44.557	26.697	4.95	112	123	0	116	5	2.551	3.473	2.857	573	1.55	13.6	1.3	38.5	928	1702	535	15.93	8.99	1.604	3313	3690	127.5
55620	NO	2173	256.46	25.7	58.78	106.68	51.443	32.072	12.742	3.77	231	559	846	3496	27	1.449	1.987	2.094	354	5.44	147.6	0.6	87.1	547	900	285	12.24	10.34	1.51	2744	3682	67.6
55626	NO	975	124.92	14.1	57.69	27.93	9.256	11.26	4.314	2.5	203	278	12	802	228	0.811	1.306	1.185	184	3.45	64.9	4.1	22.4	562	920	170	8.57	8.99	0.55	2160	1998	63.9
55629	NO	1888	281.18	19.7	62.75	62.08	17.484	23.166	15.837	3.55	265	298	71	346	10	2.207	2.442	2.031	441	5.15	17.5	5.5	25.3	737	1310	274	38.94	8.72	0.727	3054	2445	105.4
55632	NO	2482	244.56	7.7	154.54	85.01	30.059	32.779	11.948	5.76	247	257	28	75	89	1.29	3.234	1.76	325	8.98	103.2	5.3	30.1	1667	1917	294	15.47	23.95	3.514	3547	3235	164.9
55662	NO	2063	237.59	10.1	53.95	90.2	23.005	31.554	27.013	5.21	86	210	459	1219	94	1.695	1.774	1.354	343	2.72	51.3	2.2	119.4	556	796	198	11.87	6.98	0.943	4391	2278	91.8
55664	NO	2644	172.87	18.5	143.1	124.37	47.675	50.494	11.957	4.7	546	550	2	67	2	2.127	3.365	8.248	850	19.42	14	9	28.5	1627	2478	447	21.82	31.06	1.29	3725	3311	138.9
55666	NO	2439	286.85	15.7	84.53	105.38	33.936	39.547	23.735	9.81	387	425	0	437	0	3.517	2.264	0.955	667	3.91	6.6	0.5	64.1	1293	1426	222	36.98	8.9	1.131	4657	1393	150.9
55673	NO	1501	155.33	14.5	84.84	27.65	8.353	9.767	5.607	3.32	286	324	69	374	129	1.44	1.273	2.669	342	2.44	53.7	2.4	38.6	499	1111	214	13.4	8.25	0.698	2866	2397	128.6
55678	NO	1574	162.93	8.5	55.61	80.04	31.25	32.054	11.307	3.48	415	426	2	153	0	1.251	1.92	0.891	325	4.7	5	7.6	24.9	1337	1631	210	10.26	8.53	0.802	2795	1796	68.6
55679	NO	1479	261.65	30.8	41	23.48	7.135	8.683	5.599	2.8	398	434	53	275	350	1.353	1.662	1.639	368	3.34	338.2	4.3	13.5	959	1128	375	9.98	7.59	1.482	949	3075	31.5
55685	NO	2505	252.42	2.9	143.97	93.69	22.259	31.772	30.565	9.18	461	467	0	57	13	0.927	1.325	1.857	363	28.82	1.7	1.5	61	544	1934	279	12.28	11.81	1.973	7188	2062	236.9
55686	NO	1899	172.33	16.6	141.14	70.98	19.594	25.089	19.418	5.26	213	661	1597	4554	39	1.239	2.043	1.744	246	3.45	42.1	4.7	194.2	713	1638	290	14	13.74	1.543	5670	3292	132.9
55691	NO	2619	315.55	19.6	85.61	119.14	35.714	36.171	31.681	13.55	552	723	203	1799	307	1.889	2.971	3.39	713	8.26	293.2	11.4	194.8	2394	1649	377	19.43	22	1.431	3631	4993	82.6
55698	NO	1446	173.34	15.2	46.68	65.1	19.959	25.006	15.53	6.17	553	996	1583	4508	34	1.806	3.289	2.688	448	7.15	61.5	6.9	165.7	813	885	234	24.09	5.62	0.949	3810	2488	61.8
55703	NO	1870	286.84	11.2	69.67	50.36	17.41	22.856	6.001	4.33	65	103	1	425	11	1.548	1.071	1.137	380	4.28	13.8	0.3	28.3	633	1133	150	14.24	12.15	0.822	3830	1903	106
55709	NO	2292	312.95	17.5	95.95	54.61	17.802	15.969	14.267	17.37	246	691	207	5211	44	0.721	2.054	3.516	333	3.19	147.7	0.9	456.3	484	1010	301	9.04	10.69	1.181	2328	3449	97.8
55721	NO	2993	442.09	12.4	93.35	95.96	40.406	32.837	11.663	3.71	242	298	79	559	184	2.315	1.843	0.834	522	4.22	201.9	3	80.7	1601	1628	216	19.36	12.58	0.86	5584	2044	146.5
55730	NO	1750	169.48	9	70.45	78.65	28.71	25.456	18.743	5.94	346	378	40	344	9	0.807	1.3	1.236	197	4.55	21	7.2	50	1254	1281	274	7.58	6.16	1.022	2994	2424	69
55753	NO	2248	298.31	10	72.76	88.29	26.697	37.478	17.407	4.97	845	846	0	26	0	1.893	2.069	2.668	319	2.6	11.3	3.3	30.6	649	1352	247	17.22	8.33	1.106	3309	2283	124.4
55754	NO	2811	309.39	19.3	95.62	106.94	37.649	33.393	24.714	7.31	684	719	4	428	10	2.559	2.498	1.422	777	4.79	12.6	6.4	71.1	1332	1754	333	18.94	10.69	1.305	4553	2666	176.5
55766	NO	854	115.58	3	31.06	30.62	13.923	7.862	6.645	1.56	512	527	20	165	49	1.148	1.917	1.677	267	6.34	39.8	7.6	20	605	518	107	14.55	2.48	0.319	1342	1075	62.8
55768	NO	2297	262.58	16.1	92.33	103.54	52.39	29.603	14.29	7.33	1016	1050	0	405	10	2.362	3.416	1.576	506	6.29	67.9	8	47.4	1934	2160	292	18.19	11.03	1.015	3843	2276	152.6
55776	NO	3083	240.21	8	181.38	155.17	59.68	50.803	31.119	17.25	1136	1490	1270	3611	31	1.121	2.779	2.413	355	26.73	40.4	5.2	124.3	730	2301	316	15.52	18.4	2.387	7052	3073	311
55784	NO	1397	196.48	34	87.65	31.56	9.281	11.749	6.53	7.88	91	235	168	1475	321	1.431	1.188	2.29	609	2.27	275.6	1.7	43.7	481	1116	287	15.01	11.09	1.494	2952	3563	90.7
55789	NO	1667	106.88	5.8	103.18	89.64	26.047	31.032	26.252	6.83	464	471	2	88	17	1.649	2.172	2.037	253	2.89	1.2	5.7	69.2	361	1266	188	9.15	8.52	0.598	4235	1548	176
55797	NO	3958	303.5	17.1	229.14	198.67	75.992	75.617	28.367	17.39	477	626	10	1734	30	2.948	4.801	2.999	538	15.04	152.3	3	120.6	2709	2752	463	27.89	37.14	1.946	7539	5164	240.1
55800	NO	1849	331.58	8.1	29.37	49.16	19.077	17.201	9.593	1.46	192	201	30	99	0	0.758	1.287	0.621	185	0.63	10.9	3.6	22.3	793	652	116	6.25	2.8	0.445	1580	1121	66
55808	NO	1629	220.3	17	70.18	51.81	10.452	17.983	15.938	11.2	45	158	8	1284	121	1.483	1.095	1.193	389	3.4	16.5	1.4	69.2	370	889	223	12.72	9	1.031	3125	1999	160.5
55812	NO	2696	388.2	29.9	63.95	82.33	13.075	32.399	29.659	21.56	511	850	472	3793	71	2.303	2.411	3.384	907	10.12	340.5	6.5	126	1260	1306	515	24.32	43.99	3.87	3201	4516	128.1
55813	NO	2253	360.92	13.3	53.31	70.34	21.006	25.175	16.313	3.18	658	678	50	208	8	2.359	2.515	2.136	686	6.3	24.2	6.1	39.5	836	1125	247	27.56	15.21	0.754	2913	2455	75.5
55840	NO	2744	299.92	16.1	146.97	109.43	38.535	41.842	17.86	8.78	261	583	23	3770	170	2.264	2.605	2.684	792	6.89	103.8	4.8	248.3	1906	2075	400	30.52	25.21	1.272	4353	3762	179.4
55849	NO	1766	162.54	7.1	90.77	82.87	30.196	29.288	18.442	2.98	233	434	40	2434	23	2.494	1.893	1.156	354	2.63	6.8	1.1	33.7	921	1758	196	21.48	10.44	1.714	10669	1648	175
55859	NO	2401	304.01	12.2	82.16	96.85	23.158	36.176	31.261	11.27	997	1010	29	140	33	1.825	3.199	2.038	543	7.37	35.3	12.2	60.9	780	1579	217	21.95	11.67	0.885	3400	1477	179.2
55862	NO	3574	329.79	28.4	151.44	185.73	73.243	60.835	27.767	11.22	683	2727	226	24103	651	2.918	3.851	2.899	555	10.68	327.9	6.6	94.6	2084	2268	475	21.37	23.69	1.995	7405	5313	189.4
55871	NO	2846	380.07	13.7	82.79	114.91	47.155	30.379	26.444	6.21	779	838	96	637	1	3.777	3.62	3.826	659	11.2	47.2	8.5	93	1505	1638	269	32.11	10.05	1.06	4866	3038	126.1
55875	YES	1530	192.2	8.2	75.92	51.98	17.497	18.295	12.589	5.14	357	382	39	224	104	2.71	2.254	2.692	377	5.14	134.6	6.2	17.4	964	1129	216	16.18	8.84	1.02	3473	2670	110.1
55877	NO	2225	339.42	39.8	79.18	50.62	20.548	16.984	8.275	8.4	813	1062	3	3016	16	3.207	3.961	5.234	878	11.41	254	5.3	472.1	954	1647	531	27.39	14.64	2.095	4314	4327	80.3
55880	NO	2113	328.09	23.8	55.85	57.88	15.577	20.6	18.182	7.75	382	543	509	1657	28	1.175	1.429	1.752	479	3.28	135.4	2.4	59.5	820	1234	332	19.96	8.22	1.24	1983	2676	54.8
55891	NO	1573	294.88	26.6	48.43	28.42	8.151	10.365	7.822	4.32	322	370	34	479	163	1.653	1.501	1.743	390	0.4	31.6	0.5	24.3	455	780	282	16.55	6.59	1.162	1538	2425	77.2
55892	NO	2964	306.05	27.5	100.6	157.94	40.706	48.432	47.229	17.06	418	813	133	4592	149	3.089	2.761	2.076	788	6.87	87.3	6.5	391.2	1456	1819	456	33.86	15.27	1.551	4707	3804	128.5
55896	NO	1267	90.54	3.1	55.78	52.69	18.562	21.241	8.412	2.86	244	269	46	269	9	0.761	1.136	0.938	222	3.07	6.8	3.6	19.7	708	932	165	7.65	7.02	0.534	2097	1181	86.3
55903	NO	2104	205.86	4.8	106.07	84.7	28.099	33.31	15.895	3.15	815	818	2	29	11	1.369	1.83	1.754	459	5.62	3.9	3.9	20	567	1425	220	15.22	11.62	1.567	4343	1708	165.2
55915	NO	3066	504.29	35.9	111.95	68.61	23.023	22.801	15.933	6.56	537	984	1741	4470	31	1.967	3.206	2.201	450	3.8	76.6	10.3	105.5	1309	1853	392	13.91	11.27	1.487	4379	3518	166.9
55918	NO	959	159.51	9.6	27.97	23.91	6.526	10.064	6.078	2.5	17	42	37	230	93	0.853	0.583	0.59	252	0.13	119.7	0.1	15.2	268	444	125	7.5	2.42	0.659	1898	1295	38.5
55920	NO	1797	167.81	16.1	70.79	80.82	29.017	35.216	7.464	3.61	114	153	11	448	23	1.151	1.148	1.159	208	4.06	34	3.4	20.5	861	1385	267	12.36	14.13	1.341	4645	2147	102.9
55944	NO	1222	210.97	38.9	37.19	42.09	17.414	13.469	8.349	3.29	168	269	310	974	176	1.115	1.535	1.393	301	3.25	114.8	1.7	51.9	774	911	266	13.42	10.39	1.099	1717	1867	39
55947	NO	3690	451.77	28	108.32	165.02	48.754	62.008	37.672	11	421	467	85	437	18	3.093	3.506	1.364	727	5.67	17	7.1	57.4	1547	2695	395	28.35	16.07	2.249	6354	3270	166.1
55953	NO	1742	178.83	7.7	63.25	87.03	36.608	29.655	13.815	5.9	423	547	47	1463	18	1.188	1.971	1.086	324	4	37.6	3.2	123.2	885	1006	153	11.19	9.24	0.68	2637	1795	96.1
55954	NO	2021	263.78	22.8	70.77	83.34	21.437	36.081	20.405	11.86	164	413	553	2722	3	1.086	1.586	1.707	344	2.43	111.4	0.8	196.4	641	1108	304	9.55	9.42	1.336	3145	2569	55.6
55960	NO	1539	120.93	5.3	57.95	57.83	13.65	22.492	15.774	5.47	231	355	444	1247	29	0.937	0.998	0.813	209	3.58	44.1	8.1	80.4	448	771	177	10.07	5.08	0.661	2165	1505	135.2
55967	NO	2882	411.32	13.9	101.91	92	31.302	38.029	14.237	4.13	328	355	28	289	0	2.854	2.643	1.634	534	3.38	91.5	5.3	48.8	2035	2503	298	24.3	11.45	1.31	5209	2648	126.6
55969	NO	1722	194.65	12	56.42	80.4	20.651	38.426	15.682	4.13	124	197	84	760	161	1.007	0.979	1.132	277	1.01	123.6	2.1	65.2	335	700	177	8.42	5.52	0.61	2799	1678	66.3
55971	NO	2340	317.33	22.8	92.76	71.8	19.037	26.862	16.447	6.27	644	716	49	793	155	2.447	3.327	3.084	812	8.28	131.9	3.8	108.4	704	1448	354	21.71	16.58	1.372	3378	3365	162.5
55974	NO	1534	175.41	12.2	61.77	65.41	24.227	19.391	12.801	4.48	351	436	68	996	7	1.778	1.304	0.501	523	2.51	19.6	1.8	75	1010	1070	161	12.94	7.11	0.836	2929	1242	109.1
55980	NO	4440	390.74	21	221.26	227.9	94.726	78.541	34.619	11.98	1164	1247	18	920	266	2.343	4.392	4.259	292	18.47	199.4	17.2	109.2	3365	3734	527	16.65	34.12	2.181	6496	5785	244.6
56005	NO	1650	186.6	16	88.5	65.49	25.369	22.09	13.532	4.25	481	586	567	968	31	2.633	2.014	2.701	387	5.95	80.5	4.1	42.7	1146	1415	315	17.43	14.64	0.977	2546	3075	117.5
56010	NO	2823	386.54	35.7	176.13	66.61	19.04	21.832	15.393	8.25	297	796	104	5886	62	2.941	5.925	3.977	657	9.37	200.8	4.2	491.6	1843	3035	699	24.31	23.36	2.496	7608	7341	213.6
56021	NO	3973	340.28	25.2	151.47	175.59	38.251	80.109	45.481	19.92	661	701	28	433	83	1.7	2.609	2.567	540	3.44	108.1	3.8	84.1	725	2026	658	21.01	16.85	2.967	3733	3980	306.1
56028	NO	3298	394.43	29.1	113.8	141.41	58.706	47.36	24.562	8.89	823	921	302	1010	37	1.972	2.659	1.808	597	4.09	37.4	4.9	61.7	1433	2031	366	19.88	12.06	1.541	5298	3948	167.5
56032	NO	1582	228.91	23.8	79.8	34.67	10.521	10.6	8.898	10.09	234	965	100	8516	403	1.912	1.931	2.33	731	5.27	193.6	17.1	664.8	1220	1251	379	14.82	7.94	1.457	2955	4154	122.9
56035	NO	780	170.6	10.1	17.28	4.25	0.872	1.157	1.221	1.55	15	129	281	1174	90	0.676	0.264	0.669	190	0.5	91.5	1.3	16	113	331	98	4.99	2.06	0.405	1386	1207	33.1
56052	NO	1921	189.21	7	82.97	47.12	12.956	20.791	8.631	2.53	53	774	3034	7140	0	1.604	1.09	2.128	268	2.53	55.1	1.8	61.6	246	1000	218	5.42	8.24	0.734	2560	1524	152.8
56054	YES	4277	362.11	24.6	171.54	182.17	68.256	63.754	31.825	13.03	1131	1233	41	1153	138	3.168	3.956	2.56	884	10.96	63.3	11.1	88.5	2241	2915	403	28.6	25.28	1.79	7528	4592	258.5
56060	NO	1573	237.74	18.4	82.73	33.71	10.106	12.423	7.735	3.64	330	1058	2939	7285	32	1.666	2.086	2.642	467	3.19	40.6	4.4	38.5	493	1138	238	25.2	7.67	0.8	2816	2569	107
56067	NO	2075	263.51	11.8	123.83	57.9	20.534	21.123	10.649	8.17	695	753	65	474	434	1.778	3.274	2.725	447	7.89	297.6	7.6	43.6	1215	1712	300	13.56	18.82	0.965	2541	4300	163.6
56072	NO	2559	202.97	9.6	158.73	120.51	29.331	48.09	33.491	12.25	796	811	0	190	28	1.723	2.638	3.411	434	4.99	3.7	7.6	65.5	628	1622	254	17.58	11.5	1.18	4709	2105	233.3
56083	NO	506	79.89	6.1	30.23	8.44	2.251	2.467	2.413	1.14	41	341	1155	3023	0	0.524	0.483	1.138	136	0.55	21.1	0.8	29.2	408	354	129	3.11	1.79	0.416	812	1228	43.9
56096	NO	2257	292.83	16.2	67.04	93.39	30.205	27.141	27.026	5.19	234	264	0	348	2	1.409	3.542	7.889	367	8.71	10.6	0	49.5	888	992	223	12.62	7.38	1.189	3274	1188	87.7
56099	NO	1172	82.19	6.5	48.73	22.38	7.446	8.251	4.365	2.86	217	442	40	2694	1	0.357	1.092	1.545	121	1.15	40.4	2.5	246.2	555	789	217	6.79	5.28	0.862	1088	2015	48.4
56107	NO	1950	209.21	9.3	49.95	70.46	17.154	31.858	16.231	5.26	187	201	0	157	3	1.132	0.938	2.063	203	2.48	45.1	0.7	51.4	321	1074	234	8.23	7.58	1.103	3231	2321	58.8
56114	NO	2038	276.24	26.3	132.3	46.72	10.023	15.006	15.303	6.94	72	794	792	8217	184	1.584	1.743	3.762	696	2.05	122.7	3.1	430.3	678	1441	388	20.5	11.98	1.873	6433	4143	176.6
56129	NO	2124	287.99	29.1	71.46	80.44	19.437	30.781	22.173	9.52	465	730	818	2756	66	0.951	1.684	1.88	361	1.86	232.9	6.7	54.8	819	1469	330	14.73	8.99	1.398	3833	2882	117.9
56140	NO	2768	377.7	31.7	117.26	93.79	36.889	32.283	16.27	11.83	1052	1787	70	8711	160	2.548	4.153	2.415	839	7.5	211.1	10	764.4	2429	2234	489	25.86	21.44	1.948	4250	4649	179.1
56155	NO	2347	186.43	38.6	82.45	156.04	30.829	70.646	46.303	25.15	676	721	43	476	76	1.712	1.348	1.913	574	2.92	58.5	3.4	28.3	857	1417	615	15.19	12.7	2.484	1386	3197	40.7
56163	NO	1622	261.01	15.3	60.55	38.31	11.078	14.988	6.872	2.85	4	49	156	463	13	1.595	1.079	0.606	318	1.7	14.4	0	25.5	388	969	174	15.16	9.26	1.007	3893	1365	75.3
56173	NO	2542	399.91	37.9	84.63	75.44	26.445	24.493	17.668	9.06	456	923	1354	4898	25	1.997	4.024	1.363	490	3.76	95.2	5.6	92.8	1337	1741	431	17.55	10.62	1.439	3716	3969	129.4
56176	NO	1966	215.14	10.2	52.31	67.51	27.418	21.164	13.218	7.1	201	249	7	555	6	1.297	1.337	1.406	336	1.74	28.3	1.4	37.1	534	865	226	10.36	6.27	0.91	2399	2000	107.1
56179	NO	2172	259.51	27	93.13	88.37	29.834	32.957	19.71	9.2	235	843	2331	6091	58	1.62	1.427	2.784	726	6.32	86.3	3.8	143.8	881	1440	416	19.85	13.13	2.024	4573	3315	136.5
56180	NO	1780	168.58	11.9	86.48	56.71	16.122	14.584	19.601	7.17	256	273	17	215	57	1.354	1.444	2.06	285	5.87	72.5	1.6	46.9	641	1203	303	7.22	14.4	2.022	3065	2752	150.1
56187	NO	2656	219.31	13.1	136.88	136.25	49.766	47.013	26.964	11.26	653	691	0	441	8	1.325	2.298	3.131	342	10.99	33.1	4.5	51.2	1003	1806	352	20.5	18.9	1.433	5105	3917	170.7
56188	YES	1456	126.24	9.4	45.94	40.18	16.798	15.823	4.133	3.32	329	762	1556	4379	0	0.619	1.758	1.524	232	4.28	49.4	9.5	152.4	1198	1069	261	3.74	7.1	0.855	6186	2732	56.2
56196	NO	2036	266.65	12.6	84.46	76.67	21.171	32.585	15.778	5.82	1183	1225	16	522	9	2.057	5.173	2.391	601	11.3	71.5	15.2	43.7	1742	1951	503	28.21	24.53	1.863	2408	4407	89.3
56200	NO	1385	99.98	2.4	63.33	80.02	31.198	35.069	6.853	1.52	73	105	0	391	4	1.247	0.905	0.859	116	4.38	1.8	2.5	6.5	253	603	92	9.24	9.98	0.572	2173	938	93.2
56206	NO	4608	385.62	19.6	207.89	247.16	82.155	105.139	34.738	7.43	230	293	24	712	53	3.111	3.073	3.066	634	7.28	100	4.4	62.4	1107	2440	500	33.7	24.67	2.48	8467	4475	187.1
56219	NO	2177	199.3	9.2	69.16	96.86	35.217	39.063	12.419	4.93	230	238	0	76	5	1.728	2.419	1.024	381	4.76	11.9	1.9	22.8	494	1009	237	15.91	12.61	0.975	3561	2547	116.3
56221	NO	1380	138.15	18.3	50.91	77.06	11.439	36.461	25.35	12.94	0	418	0	5005	0	1.378	1.183	0.914	716	0.11	41	0.1	396.3	311	846	487	10.24	8.17	1.869	3712	3420	48.6
56222	NO	2291	394.83	59.3	67.38	56.48	14.509	23.672	14.65	7.76	181	203	40	176	175	1.812	1.605	2.796	782	3.7	109.5	1.2	43.3	741	1698	489	20.09	11.23	1.851	2604	3751	89.9
56234	NO	2057	205.16	12	80.65	91.82	36.175	29.335	16.767	6.12	459	489	31	225	215	1.367	1.961	1.905	293	5.16	175.6	2.4	44.3	1346	1440	238	8.94	11.24	1.208	3937	2707	97.7
56240	NO	2793	155.74	10.3	79.58	48.19	18.301	14.744	10.747	9.77	115	187	153	810	3	6.088	2.539	2.507	557	4.59	221.4	1.7	40.9	1021	1256	339	16.39	13.3	2.016	2775	1944	76.6
56258	NO	2329	178.83	11	108.77	130.59	53.506	47.4	16.625	5.47	510	532	33	244	13	1.792	2.101	1.978	289	8.11	21.9	4.7	28.5	1053	1546	222	13.49	18.11	0.93	4527	2804	136.2
56264	NO	2565	317.78	13.6	118.7	91.37	31.044	34.416	16.943	5.19	792	803	30	101	2	2.458	2.94	2.901	431	5.65	33	11.2	26.9	1758	1802	288	21.42	18.53	1.086	3696	2431	181.2
56266	NO	3388	305.74	16.9	136.23	184.95	46.08	87.201	39.144	10.86	299	318	13	220	7	2.092	2.352	1.456	414	7.82	6	14.7	88.2	596	2506	290	16.74	6.9	1.689	4403	3004	258.9
56275	NO	2996	227.26	18.4	98.44	159.32	40.392	71.2	33.262	17.95	289	389	126	1109	25	1.851	1.637	1.723	248	2.68	114.9	1.5	131.2	1140	1535	397	14.54	12.28	1.812	4414	3043	130.1
56282	NO	1913	213.92	16.7	75.8	71.42	20.585	27.215	16.859	6.97	338	1060	2421	7424	53	1.145	1.496	2.512	295	2.84	178.4	5.5	78.3	772	1207	321	9.5	7.87	1.229	3411	3652	110.8
56288	NO	1897	327.31	8	75.6	34.68	11.478	14.148	5.323	1.3	36	36	0	10	0	1.959	5.491	6.331	287	16.94	3.5	1.4	8.4	420	972	184	8.34	7.47	0.774	2713	1938	123.9
56291	NO	2626	395.09	7.1	59.26	90.97	30.322	35.871	19.017	6.46	164	170	0	67	6	1.391	1.824	0.711	378	1.04	3.5	0.4	32.6	493	1078	165	15.08	9.02	0.829	2797	1564	83.5
56295	YES	2186	199.05	12.5	105.77	43.23	18.307	16.621	3.082	3.11	81	1580	67	17963	4	1.654	2.129	2.299	133	7.72	49.8	1.7	11.9	530	1263	219	14.92	20.75	1.308	4051	3101	103.3
56302	NO	1870	265.85	12.9	75.33	58.38	16.012	15.948	21.723	6.02	411	434	59	176	221	1.775	2.384	1.418	350	3.93	252.4	8.4	27.2	1519	1513	589	13.63	9.19	1.465	2692	3732	113.6
56307	NO	2286	345.24	19.1	73.67	75.05	22.892	21.429	25.804	25.27	356	541	273	2090	15	1.429	1.587	2.302	286	3.14	143.5	4.7	67	757	1634	288	9.24	8.75	1.622	2790	3220	124.1
56313	NO	1347	158.5	9	73.91	39.34	14.003	13.391	9.129	2.98	614	816	756	2056	4	1.616	2.592	2.235	410	6.83	30.4	8.3	37.6	977	1156	202	16.89	10.45	0.927	2949	2634	56.8
56317	NO	1623	133.23	12.2	88.31	26.96	6.491	9.255	8.219	3.64	6	81	15	905	0	0.732	1.739	2.451	202	4.95	33.1	0.1	87.5	217	974	253	10.95	15.32	1.079	1750	2051	57.9
56319	YES	1388	115.84	8.8	53.13	80.46	31.363	27.426	15.434	5.06	303	464	484	1626	84	1.094	2.349	1.01	175	2.02	20.4	1.4	55.6	400	680	221	6.9	8.19	0.954	2451	2405	64.2
56328	NO	2633	373.54	10.2	140.7	65.39	16.843	18.91	21.781	5.55	194	205	0	157	1	1.933	1.262	2.692	255	5.48	1.1	1.8	58.5	709	1844	231	17.12	20.72	0.896	6288	3874	196.3
56330	NO	2210	186.56	4.9	75.18	42.49	11.291	13.489	8.981	6.36	285	302	7	189	1	0.955	1.427	1.945	434	5.13	10.6	3.6	14.1	738	1413	328	7.1	6.21	1.055	3450	1866	155.6
56331	NO	1702	164.8	7.3	63.63	60.32	15.974	18.962	19.233	5.41	67	71	4	38	12	1.308	0.773	0.51	253	4.82	4	3.9	46.8	411	774	147	9.9	6.46	0.697	2169	1064	87.8
56334	YES	1777	257.34	6.9	55.77	61.42	28.947	19.456	7.366	2.76	771	823	21	594	4	2.221	3.218	1.81	573	7.32	66	11.9	23.6	1923	1349	212	28.15	8.19	0.978	2674	1818	75.1
56348	NO	1812	279.11	33.7	66.5	55.04	17.189	16.812	14.727	10.97	271	1373	2552	11794	387	1.554	1.549	2.97	391	5.25	151.2	14.7	131.4	419	1197	353	12.4	6.63	2.2	5118	4821	104.7
56355	YES	1584	167.54	14.2	76.06	69.63	13.609	26.601	24.061	12.99	247	323	57	851	64	0.982	1.793	1.301	264	9.8	82.3	7.6	83.5	796	1309	251	10.9	7.4	1.029	2541	2240	127.9
56358	NO	2051	278.6	29	74.27	40.16	10.975	13.897	9.6	3.61	32	110	167	819	79	1.333	1.106	2.945	313	2.68	133.7	0.8	31.7	446	1762	463	10.36	12.92	1.167	1521	2959	88.9
56364	NO	3074	457.65	21.4	70.8	114.98	27.604	42.546	37.983	14.64	664	709	0	505	95	1.899	2.715	3.244	795	8.75	30.1	4.6	51.2	870	1242	382	17.03	12.24	1.742	2736	3443	101.1
56369	NO	5115	817.05	58.8	174.38	143.14	42.62	57.296	31.868	16.08	1143	1250	259	1077	120	4.793	5.729	5.542	1742	14.87	120.7	14.7	67.1	2306	2625	652	67.63	41.93	2.713	6254	5240	218.3
56373	NO	1760	221.41	11.6	67.28	67.19	29.94	20.915	10.13	4.3	246	277	0	362	0	2.569	1.571	0.705	475	2.65	9.7	0.5	32.7	1044	1199	152	13.48	7.92	0.696	3798	1316	113.3
56379	NO	2100	294.73	14	76.03	68.97	29.467	23.569	9.234	2.65	623	636	9	170	31	3.27	4.859	2.866	570	6.92	74.3	8.7	25.1	1284	1301	333	22.51	10.7	1.681	4252	4118	107.4
56380	NO	3383	448.63	42.1	141.01	119.43	39.989	46.581	24.725	8.36	183	208	9	297	53	2.117	2.395	2.422	505	7.8	61.5	3.1	66	1121	2068	476	22.54	21.96	1.843	5041	4603	193.6
56382	NO	1673	205.56	18.9	124.59	40.33	12.552	11.667	10.668	7.88	173	2014	245	21930	111	1.692	2.68	3.151	659	3.2	68.7	3.7	518	1023	1681	428	24.83	17.61	1.391	3647	3590	153
56403	NO	4092	404.22	14.1	132.31	164.86	62.742	65.832	24.846	15.32	886	988	61	1154	88	2.094	2.518	2.346	619	7.35	41.3	6.7	67.8	1117	1888	436	18.5	15.82	2.972	5123	2583	260.8
56411	NO	2205	233.92	15.4	91.09	103.03	34.87	42.75	18.925	5.56	627	631	30	57	23	1.537	2.655	2.094	208	6.57	13	11.9	22.3	919	1748	288	11.26	12.4	0.814	2765	2397	135.8
56412	NO	1810	220.95	7.4	100.66	59.56	16.901	20.446	17.443	8.66	4738	4762	17	286	55	1.253	3.834	2.594	445	48.61	67.7	12.8	37.2	1233	1978	276	14.2	10.71	7.398	2781	2937	152.4
56415	NO	2463	263.51	10.2	74.45	99.95	20.764	36.397	35.462	10.58	99	375	543	2999	97	0.825	1.146	2.027	274	1.63	171.2	0.2	78.4	418	830	263	8.06	6.97	1.093	2346	2521	91.2
56427	NO	4605	386.3	20	141.5	279.58	62.089	84.573	107.127	23.87	1970	2182	883	2065	76	2.607	4.677	4.049	687	11.01	91.2	13.7	227.3	1227	2017	435	23.19	16.4	1.883	6898	3924	278.9
56430	NO	2604	363.71	11.6	139.44	69.67	20.048	25.127	18.164	6.84	208	363	521	1552	103	0.895	1.685	2.506	221	5.74	35.5	9.4	60.7	623	1493	286	10.88	11.09	1.082	3181	3401	187.6
56449	NO	2480	390.48	22.7	55.28	82.42	38.703	23.487	12.526	4.82	1085	1175	58	990	136	1.587	3.01	2.21	361	3.21	94.3	4.6	48	1555	1328	360	11.23	8.33	1.065	1885	2821	83.1
56455	NO	1305	209.58	19.1	63.72	27.87	6.236	9.31	7.945	6.47	1240	1320	2	942	0	1.686	2.071	2.713	462	6.3	27.4	21.1	123	854	1360	357	20.08	6.41	1.237	2021	2854	107
56456	NO	1077	178.43	17.6	40.07	28.18	9.066	9.819	7.344	2.96	233	263	113	175	285	0.9	2.033	1.2	185	2.3	26.4	4.7	8.1	822	1128	304	6.37	5.93	0.871	1372	2436	49.6
56462	NO	2638	370.49	8.7	75.51	73.21	23.171	28.054	15.145	4.63	219	250	21	368	2	1.25	1.032	2.145	298	1.58	14.8	0.6	40.4	772	1375	253	10.3	6.05	1.151	3281	1847	107.2
56466	NO	2789	363	38.3	137.74	66.38	15.695	21.65	25.172	18.49	1877	2420	1573	5605	248	2.405	4.86	5.072	759	15.5	162	35.8	191.6	2434	3290	748	33.14	17.71	2.227	3735	6781	161.6
56479	NO	998	152.42	9.5	50.93	20.74	5.435	8.068	4.751	3.47	73	981	3946	8784	302	0.733	0.481	1.63	235	0.42	132.7	0.2	48.3	337	581	188	6.17	3.69	0.723	1304	2087	47.4
56481	NO	5825	799.7	48.9	228.16	203.84	44.453	65.673	75.936	25.13	731	1004	133	3172	198	5.09	5.163	6.328	1087	14.91	373.4	14.5	268	2385	3433	904	40.2	23.38	5.838	11255	9406	410.1
56494	NO	2876	261.15	12.4	141.22	117.74	40.383	45.664	18.22	9.59	215	285	0	803	6	2.052	2.474	2.069	443	8.81	19.2	6.9	64.1	1006	1704	326	23.18	26.37	1.37	4033	3038	205
56497	NO	2182	128.08	1.2	74.35	93.56	32.436	46.094	8.535	1.75	9	130	31	1427	0	1.494	1.569	2.244	180	4.11	11.2	3.2	123.1	236	1132	226	4.67	13.74	0.546	3021	2036	146
56500	YES	1417	104.98	5.1	75.29	76.35	31.712	29.546	8.244	2.02	407	418	18	127	2	1.28	2.324	1.118	274	8.78	1.7	3	23.2	462	813	137	15.01	9.77	0.67	2022	1569	81.9
56502	NO	1442	205.92	6.1	67.47	40.85	15.737	14.43	6.386	2.29	186	448	1002	2628	7	0.863	1.006	1.167	214	4.74	17.3	7.2	25.7	483	978	157	6.76	4.66	0.594	1998	1660	86.9
56503	NO	3541	414.5	23	137.4	128.61	43.676	48.719	22.943	9.63	1005	1103	89	1141	49	2.73	3.918	3.765	547	12.41	48.5	8.6	90	1562	2058	478	39.35	27.49	1.66	4971	4671	179
56505	NO	714	58.05	0.8	23.58	41.62	15.823	18.369	3.999	1.05	0	0	0	0	0	0.378	0.153	0.377	124	2.19	0	0.6	8.6	44	225	42	4.41	5.13	0.269	955	259	32.9
56507	NO	1455	150.8	7.2	85.25	57.79	19.412	23.113	11.326	6.45	313	334	16	239	0	2.167	2.285	2.916	78	4.7	35.4	2.6	37.4	234	1185	218	4.07	7.17	0.458	3242	2877	132
56510	NO	1514	97.67	17.1	67.14	101.86	23.679	47.672	22.113	11.26	8	91	129	925	1	0.652	0.661	0.881	246	4.56	22.4	0.7	42	408	964	345	8.38	11.75	1.332	1547	1704	32.6
56520	NO	1489	210.52	15.8	72.1	41.24	15.489	14.135	8.092	4.01	399	745	511	3879	13	1.855	1.983	2.119	437	6.61	53.6	9.7	118.5	931	1165	234	15.12	7.85	1.062	3745	2414	99.7
56532	NO	2919	447.96	18.5	96.65	89.69	32.276	33.024	16.272	9.6	687	2262	30	18820	136	3.099	2.819	3.08	422	7.34	133.8	9.7	39.9	1042	1739	280	23.35	13.97	1.238	5530	2718	125.4
56537	NO	2278	247.16	33.6	80.54	64.7	23.372	21.089	11.988	5.44	284	324	22	502	16	1.461	4.379	11.257	932	10.93	92.5	1.9	41.4	1007	1547	358	19.55	9.73	1.523	2388	2880	86.9
56542	NO	996	111.88	4.9	43.09	30.99	8.354	13.27	6.618	1.28	337	337	6	9	3	1.614	0.951	1.21	209	0.83	90.4	1.1	4.7	254	606	120	10.48	5.38	0.481	1031	1208	73
56543	NO	1555	215.26	12.5	64.42	50.99	22.481	17.952	7.124	2.19	131	207	233	787	13	0.432	0.862	0.744	119	1.65	16.8	0.8	16.8	484	935	208	6.3	7.03	0.778	2915	1622	44
56562	NO	5775	621.89	38.6	315.7	229.97	102.6	80.367	22.657	14.77	1133	1519	33	4342	693	3.168	5.659	4.297	612	21.81	138.7	14.7	94.1	3957	4735	794	41.42	54.66	3.018	8984	7273	390.7
56565	NO	3049	282.54	15.6	92.26	109.98	37.129	41.28	24.563	5.63	485	530	49	510	61	1.697	2.555	2.154	409	6.96	12.3	6.2	75.3	1515	1854	444	13.49	14.31	1.192	4514	2993	132.8
56567	NO	2092	269.29	20.5	105.38	69.46	30.337	22.088	9.963	2.5	915	935	0	267	6	2.382	4.8	1.775	496	10.35	34.6	16.4	26.8	1741	2013	384	31.63	32.99	1.668	3552	4182	117.1
56573	NO	1635	152.88	10.5	83.11	77.66	21.1	29.249	21.498	10.54	434	453	0	234	9	1.121	1.661	2.833	212	5.59	27.6	3.3	53.5	325	1048	211	10.26	10.72	0.861	3259	3139	134.2
56581	NO	2007	261.82	12	57.65	84.47	31.905	28.65	16.672	6.76	419	429	0	81	8	1.131	2.136	0.975	265	4.02	22.4	4.1	39.7	842	1088	261	11.7	6.5	0.8	2548	2447	100.4
56583	NO	2848	230.69	5.7	99.21	105.76	40.6	40.239	14.052	2.35	251	296	65	498	4	2.082	1.773	1.965	342	5.76	31.7	3.1	37.1	1076	1496	235	10.17	11.97	1.002	5383	2685	139.6
56586	NO	5954	783.03	25.2	144.94	193.97	61.833	75.561	38.993	14.21	364	428	20	750	3	2.353	3.405	2.873	637	7.72	29.5	6.4	93.3	1822	2314	528	30.57	21.86	2.004	6809	5276	162
56588	YES	2402	183.74	27.3	63.1	81.3	18.314	28.462	28.37	14.06	315	945	86	7490	8	1.272	1.533	2.011	559	4.96	86.7	2.8	580.2	638	959	270	12.79	10.54	1.465	3943	3088	91.4
56597	NO	3203	294.31	17.9	196.88	110.38	40.847	39.959	21.471	17.73	921	1903	3932	9831	9	1.451	2.638	2.688	403	12.13	45.5	3.5	70.7	1831	3291	596	11.14	20	2.393	9376	4130	309.4
56598	NO	2784	398.81	22.4	103.17	90.52	37.777	32.642	11.712	4.62	550	564	34	175	29	1.481	2.362	2.087	354	7.33	55.8	8.3	34.4	1288	1659	328	16.04	16.01	1.165	2758	3051	112.2
56599	NO	1094	58.59	6.2	87.3	56.94	22.257	23.821	5.022	3.07	218	298	154	853	43	0.645	1.336	1.84	152	5.92	30.1	3.7	37	439	910	195	8.32	14.23	0.693	2106	2396	101.1
56613	NO	2491	314.59	10.4	101.51	100.61	27.569	47.196	18.882	11.23	436	447	0	136	1	1.138	2.52	1.31	222	7.27	5.6	10.2	16	1246	1932	454	11.42	18.3	2.052	2280	2771	222.5
56617	NO	968	140.21	10.3	57.22	21.19	6.833	5.962	4.776	1.32	78	80	0	24	2	0.273	0.437	1.443	16	1.2	1.2	0.4	4.8	832	1056	253	2.95	4.55	0.595	1248	940	68
56618	NO	2914	394.74	24.2	59.87	93.47	27.202	31.514	25.901	9.46	44	104	110	595	86	0.699	0.983	1.625	260	4.21	19.4	0.2	55.5	877	1199	466	11.75	12.82	1.384	2245	2000	64.9
56632	NO	1001	117.33	13.4	34.72	47	11.187	20.952	11.914	6.35	675	713	73	412	5	1.617	1.946	1.751	731	5.63	9.7	4.8	22	410	709	206	36.27	4.92	0.844	1623	1290	37.2
56635	NO	2638	319.86	23.5	95.28	113.27	29.042	45.579	31.01	11.07	326	362	78	387	14	1.761	1.902	1.576	460	2.66	18.2	4.3	35.5	746	1708	339	15.33	11.21	1.567	3988	2577	128.9
56637	YES	3396	561.33	54.9	119.91	93.81	40.525	23.285	20.232	10.57	991	1278	892	2982	1	2.254	3.031	4.535	601	7.22	89.2	5.4	228.3	1133	2049	603	30.1	21.35	2.063	4464	4357	139.9
56649	NO	1689	192.72	13.4	94.06	59.59	15.199	23.447	15.306	5.16	262	269	0	94	18	1.909	1.812	1.901	378	1.86	15.4	3.1	27.3	514	1550	226	13.5	7.22	0.923	4233	2195	159
56651	NO	1814	265.82	20.5	49.2	70.3	18.323	26.874	20.134	7.44	248	482	1495	2077	34	0.844	1.209	2.582	159	3.4	106.9	3.1	71	581	894	374	8.1	10.25	1.569	3224	3955	51.6
56652	NO	946	115.9	9.3	29.02	40.56	19.762	12.866	4.747	1.25	213	230	3	181	1	0.637	0.82	0.263	194	2.26	3	0.7	18.1	650	648	121	6.34	4.36	0.398	1673	888	45.7
56659	NO	4285	277.07	10.4	81.01	190.22	34.651	60.195	83.223	14.06	134	178	32	517	2	0.671	1.844	3.998	372	1.81	35.4	0.2	234.2	343	1353	423	6.31	6.07	0.855	5293	3425	72.4
56664	NO	1799	189.22	13.4	69.59	84.63	28.073	32.114	13.701	5.49	291	351	11	723	7	1.672	1.365	1.53	292	4.86	20.1	2.2	66.2	539	895	188	12.73	10.73	1	4620	2161	99.3
56665	NO	1660	205.04	10.2	57.95	69.11	19.247	17.412	26.179	6.19	18	621	2468	6015	6	0.904	1.085	1.412	179	2.76	51.8	0.2	156.6	409	701	180	7.87	10.16	0.972	2238	1815	76.8
56686	NO	2537	353.86	37.7	122.71	73.2	27.492	22.5	11.419	3.83	342	357	1	176	10	2.42	1.895	1.72	557	2.54	5.9	3.7	19.6	1237	2172	480	17.68	15.82	1.752	3264	3302	142.2
56689	NO	3608	332.81	10.8	143.54	186.71	89.865	60.142	22.154	8.15	895	934	180	364	44	2.6	8.249	2.281	436	4.4	11.5	6.4	87.3	1145	2304	450	15.58	13.87	1.093	5229	6636	162.2
56690	NO	2679	407.49	12.6	66.17	95.82	25.195	35.424	29.006	10.43	241	246	0	50	0	1.028	1.853	2.23	252	0.81	26.5	0.6	46.9	490	1177	259	10.98	6.03	0.996	2310	3495	84.6
56696	NO	2298	374.56	34.3	91.63	53.28	17.006	17.905	8.97	4.91	479	524	46	404	218	2.813	2.969	3.64	730	10.94	132.2	6.1	18.2	742	1521	342	31.65	12.89	1.231	1873	2828	100.2
56716	NO	3179	385.13	17.7	111.51	107.33	35.586	44.38	17.036	7.09	206	495	1081	2885	51	1.778	1.417	1.072	359	6.87	4.6	0.5	33.7	591	1562	222	19.53	16.98	0.89	3907	1766	146.2
56717	NO	1867	247.83	19.6	73.71	67.26	17.05	22.076	22.865	6.45	123	151	56	255	89	1.449	1.541	2.442	333	2.33	222.6	3.8	369.3	1146	1175	348	9.64	9.9	1.119	3848	2607	105.3
56725	NO	2558	352.37	32.4	100.7	90.24	26.63	32.187	22.851	6.86	11	42	0	384	10	1.775	1.74	1.437	336	5.88	9.5	0.6	93.6	566	1260	297	22.98	29.01	1.629	4252	2864	114.7
56737	NO	1608	129.19	10.1	43.47	57.33	14.664	23.047	15.669	5.85	110	191	0	963	1	1.33	1.914	0.661	277	1.67	23.5	0.8	63	435	832	193	9.93	7.14	1.015	3614	2185	64.7
56738	NO	1753	227.44	23.1	68.07	69.33	29.063	25.842	7.309	7.24	482	494	43	110	42	1.641	2.263	3.385	370	6.86	155.9	6.7	15.6	776	1272	376	19.11	15.9	2.049	3164	3845	74.1
56739	NO	1129	153.55	2.1	38.44	40.86	11.574	18.706	5.157	2.13	106	108	0	28	0	1.616	0.672	0.459	86	1.51	81.2	15.9	13.8	155	1075	88	6.6	2.13	0.301	2301	1245	67.9
56751	NO	1716	203.82	9.4	53.66	75.46	17.696	28.392	23.261	6.19	160	162	0	22	2	1.491	1.319	0.711	338	1.89	3	0.6	26.3	327	929	184	11.56	5.38	0.864	3712	1037	119
56753	NO	1086	83.27	6.4	85.47	46.33	20.281	14.835	5.925	2.48	491	528	38	390	0	2.354	2.88	2.141	161	4.58	80.5	10.2	224.5	1110	1514	217	5.11	8.89	0.784	2403	3369	101
56763	NO	1737	209.09	25.4	97.63	58.18	20.626	17.381	14.206	3.53	396	442	83	514	7	1.614	2.205	1.715	375	5.46	18.3	9.5	36.7	1236	1856	377	11.89	14	1.166	2720	3303	126.6
56769	NO	2692	328.47	11.4	91.75	89.04	26.487	32.63	24.497	5.81	445	478	27	372	12	1.846	2.138	1.689	438	3.4	75.4	4.1	242.8	992	1566	277	14.04	8.64	0.93	4153	2340	155.9
56773	NO	1870	225.18	13.6	68.47	79.9	23.454	30.016	21.556	4.59	98	147	52	541	63	1.25	1.33	1.103	328	5.48	29.3	2.6	65.1	461	832	188	15.13	12.76	0.792	3008	1688	91.8
56784	NO	1630	170.3	26.9	77.63	23.58	5.546	8.737	5.923	4.89	464	870	44	4848	26	2.314	3.133	8.584	1074	14.82	144.6	5.5	119	817	1790	494	21.77	16.74	1.689	2046	3743	75.3
56785	NO	1775	223.57	16.7	45.15	49.35	13.814	15.124	16.628	3.87	139	390	1005	2499	6	0.68	1.094	1.456	289	2.34	74.6	2.1	201.9	627	1052	231	6.53	6.02	0.533	2173	1931	56.2
56789	YES	2393	312.77	21.4	125.61	73.84	25.088	24.447	17.629	10.16	966	1130	51	1899	71	2.253	3.444	2.417	635	4.44	303.9	6.3	63	1138	1504	379	26.43	22.95	1.524	3266	4083	188.4
56791	NO	2289	244.41	11	81.97	111.44	31.98	44.445	26.987	8.41	433	449	2	197	10	1.64	1.68	1.107	337	3.78	11.9	3.9	59.4	475	1387	232	12.26	8.82	1.174	3920	1783	148.5
56792	NO	1355	195	8.9	52.52	40.91	16.684	15.56	4.628	3.54	333	383	22	521	151	0.23	1.057	0.728	115	3.34	6.3	4	17.6	647	793	167	7.92	8.09	0.728	2272	1458	72.3
56793	NO	2795	403.69	22.8	114.8	82.55	17.073	26.184	28.977	10.39	145	311	222	1848	64	2.368	2.495	3.108	460	11.06	114.2	37.7	85.2	955	1633	337	17.56	6.99	1.391	4306	3773	189.7
56796	NO	1180	155.66	0.7	30.22	48.21	19.851	21.411	4.029	3.88	538	541	0	35	4	1.189	1.189	3.011	119	21.59	15.5	4.6	5.4	444	584	65	7.95	5.91	0.204	1825	931	64.3
56798	NO	2336	137.92	14.4	118.05	147.87	61.018	55.375	17.572	9.28	395	1418	4420	10043	67	0.848	1.277	2.074	196	7.83	32.6	2.2	61.2	318	1177	312	15.64	23.39	1.146	3040	3174	118.6
56800	NO	3004	388.01	22	159.27	94.25	21.989	37.334	26.096	7.43	693	959	889	2702	91	2.667	3.48	5.928	570	12.97	97.3	10.1	70.4	1111	2507	495	22.89	11.85	1.747	4439	4444	365.4
56804	NO	2355	345.85	25.9	91.93	72.05	19.673	27.161	18.967	12.37	830	1258	173	5023	83	1.982	3.019	2.389	712	5.53	176.1	9.4	59.8	1359	1764	447	18.36	16.77	1.618	2739	3709	144.7
56805	NO	1411	247.79	31.2	41.95	31.71	4.557	11.15	13.675	5.53	0	46	65	514	7	0.975	0.493	0.911	355	0	66	0	68.7	432	911	409	14.05	6.64	1.305	1589	2463	40.3
56812	NO	787	127.48	11.6	25.97	19.26	8.151	6.038	2.959	1.25	147	147	0	24	5	0.903	0.896	0.254	205	0.77	1.9	2.2	2.6	369	501	142	5.56	3.99	0.568	1329	682	73.1
56814	NO	1990	278.46	17.4	76.37	65.11	41.936	12.544	5.368	4.48	85	1555	90	17597	7	1.5	1.143	2.054	365	4.1	176.5	1.8	32.4	342	1139	292	14.03	7.41	1.4	3950	3386	132.2
56816	NO	2560	388.82	11.7	71.84	82.26	25.797	34.095	15.511	4.79	883	902	2	241	7	2.031	2.456	2.656	406	6.84	11.4	1.2	54.4	1074	1656	206	20.89	10.76	0.687	4236	2212	86
56824	NO	1123	156.89	17.6	44.55	40.11	16.713	12.6	7.844	27.34	632	638	0	64	1	3.627	4.129	5.179	777	13.19	131.7	6.5	22.8	545	1003	258	35.29	30.79	1.144	2025	2389	55.4
56827	NO	3088	318.95	26.1	198.14	110.53	31.08	36.749	28.907	5.69	153	154	0	9	8	3.65	3.452	2.571	575	9.69	8.6	3.1	50.3	1407	2422	518	35.82	31.85	1.816	9058	3730	326.7
56829	NO	2017	139.6	19.4	77.29	134.05	32.587	57.732	33.499	15.25	457	771	17	3715	89	1.25	1.538	1.111	405	2.68	35.1	2.9	265.3	726	1646	338	12.56	11.6	1.346	2900	2389	78
56831	NO	1556	168.73	8.1	55.75	72.61	20.615	23.44	25.102	18.34	742	1208	1664	4771	0	1.027	1.165	3.141	347	9.75	36.7	4.8	174.5	955	1090	185	8.24	6.46	0.832	4166	1508	88.3
56837	NO	2272	245.35	23.2	95.17	108.24	32.599	46.918	21.175	10.48	587	962	1404	3721	134	2.484	2.947	2.967	466	6.9	93.3	3.7	61.6	758	1909	458	21.26	14.04	1.597	4665	4161	118.2
56838	NO	2242	283.24	14.7	94.11	74.89	33.875	23.573	10.153	4.36	707	751	44	515	15	1.892	3.524	2.73	417	8.52	36.1	8.9	23.8	1776	1663	317	20.1	13.51	1.323	3754	3003	148.3
56839	NO	3227	373.98	19.8	139.23	131.86	40.048	49.97	32.741	10.54	1081	1109	16	312	32	1.903	3.488	2.317	521	5.73	13.9	14	70.7	1604	2486	369	20.61	13.13	1.278	4642	2968	228.1
56850	NO	2950	342.98	23.6	147.07	112.14	35.826	48.25	20.537	15.48	1180	1210	86	270	111	4.037	4.108	6.875	1293	16.65	170.9	11	39.8	913	2064	369	32.55	14.24	1.505	5172	4081	266.3
56851	NO	2212	218.18	4.8	85.11	68.7	19.464	30.174	11.386	13.6	442	454	0	128	3	1.315	2.144	2.624	350	5.13	65.2	1.8	31.2	513	1739	224	10.07	9.2	0.832	3181	1649	117.1
56860	YES	739	103.73	10.7	45.92	16.32	5.59	6.411	2.441	2.06	241	596	1374	3556	0	0.821	0.815	1.048	309	3.99	10.9	2	23	228	571	159	14.39	10.98	0.636	1074	1003	51.3
56862	NO	1936	208.32	22.9	80.11	90.93	20.424	39.545	24.476	9.4	426	524	76	1071	178	1.515	2.275	2.976	672	4.14	186.5	3.8	109.1	747	1066	334	15.78	12.39	1.429	2526	3351	110.2
56864	NO	1178	193.21	24.5	32.28	21.93	11.395	6.024	2.929	1.44	135	164	11	358	11	1.086	0.888	1.065	304	0.15	16.1	0.4	62.1	232	662	205	9.22	4.15	1.071	2201	1978	29.7
56866	NO	2595	235.38	8.9	102.89	139.08	37.87	50.476	39.187	7.74	333	386	1	624	23	1.284	1.473	1.928	241	2.35	24.5	0.8	66.9	737	1351	207	11.19	10.04	1.048	5381	2368	130.8
56869	NO	1472	189.42	5.1	60.63	51.87	15.226	20.364	12.26	7.07	716	735	7	120	215	1.432	1.907	1.571	440	4.83	107.1	4.7	22.3	702	833	170	18.22	7.22	0.784	3020	1529	83.8
56870	NO	4145	557.53	36.6	192.81	129.75	45.275	51.678	18.583	13.18	59	127	0	804	1	1.907	1.836	2.515	609	12.79	42.2	1.6	85.6	1076	2135	468	41.99	37.42	2.177	7528	4558	150
56890	NO	1051	79.9	3.5	75.52	47.02	18.928	16.253	6.257	2.11	446	472	0	324	5	0.622	1.853	0.744	151	6.11	6.8	7.7	16.9	982	1142	157	7.94	10.37	0.572	1761	1692	99.1
56902	NO	1919	93.27	15	79.03	76.44	21.367	22.047	28.044	25.28	0	0	0	5	0	1.1	1.304	1.032	386	5.23	0.9	0.2	19.9	298	1428	267	12.2	15.68	2.007	1577	1736	156.5
56911	NO	2690	336.17	15.3	107.47	104.29	30.765	37.598	26.061	8.35	382	472	92	1031	4	1.948	2.212	2.319	468	3.13	35	3.4	65.1	1295	1820	295	15.02	10.01	1.256	5101	3133	168.4
56916	NO	2398	370.17	8.7	57.48	81.01	38.207	21.332	11.021	4.35	267	290	0	265	0	0.67	0.708	0.372	252	3.28	5.5	0.2	26	1320	1318	202	9.02	8.42	0.951	2940	983	79.7
56918	YES	2123	293.24	14.3	78.11	72.93	17.783	20.336	25.299	13.5	1047	1097	2	520	133	1.439	2.182	2.085	388	4.89	69.8	9.1	114.5	1209	1543	376	18.69	14.44	1.724	3190	2354	121.9
56919	NO	3271	267.81	18.1	120.61	156.41	45.464	74.225	25.412	7.91	470	1019	2211	5295	452	2.115	3.993	3.102	385	4.91	41.1	10.7	88.8	788	2321	691	17.52	20.92	3.955	3877	4655	142.6
56930	NO	2396	317.74	28.6	110.77	79.87	21.836	27.302	22.144	8.44	464	500	18	375	101	2.639	2.199	2.135	560	3.46	31.1	5.1	45.6	1185	1746	459	21.47	15.22	2.472	4797	3120	174.8
56936	NO	1820	276.08	22.7	72.01	51.39	14.035	17.605	14.604	6.94	305	519	258	2436	44	1.582	2.042	3.014	525	4.52	204.2	5.6	245.4	848	1351	293	16.06	8.52	1.076	3504	3053	74.5
56938	NO	2325	246.85	11.3	92.59	91.16	32.795	36.092	15.796	4.99	644	664	46	247	49	1.161	3.493	1.713	273	7.91	8.2	12.6	29.1	1619	1883	344	7.26	13.7	0.615	2802	3274	81.7
56941	NO	3256	400.59	26.1	80.37	149.93	48.487	50.872	41.092	11.14	916	956	21	478	56	1.506	2.236	3.917	400	5.34	83.7	8.4	95.3	727	1706	432	15.06	10.86	2.221	4793	3800	128.4
56946	NO	2477	267.83	18.5	112.25	76.17	30.199	23.943	15.48	7.85	343	908	1726	5772	279	1.583	1.76	1.986	400	2.78	157.7	0.8	112.9	1262	2006	311	12.71	10.3	1.201	5998	3195	162.6
56950	NO	2253	301.73	29	99.98	75.72	31.625	25.357	12.005	3.79	241	269	40	292	22	1.316	1.334	2.595	293	1.01	19.3	2.6	13.6	549	1557	408	13.26	9.1	1.311	3597	2763	122.5
56953	NO	4641	531.6	24.1	282.09	158.14	47.504	55.787	34.008	9.12	628	936	284	3367	299	3.588	4.109	6.417	649	9.34	74.6	11.4	105.8	1320	3463	531	33.41	29.01	2.014	9784	5183	393.5
56956	NO	2901	241.6	28.2	166.79	131.86	51.347	46.834	19.943	7.39	517	664	275	1550	169	2.184	4.329	3.063	581	10.99	87.2	7.9	130	1333	2280	438	20.52	25.47	1.782	5886	5414	226
56957	NO	2678	276.31	16.1	105.13	111.55	28.27	41.407	34.033	13.16	325	404	23	921	30	1.578	2.367	1.77	420	6.9	25.2	3.1	112.5	925	1916	375	12.16	9.52	1.435	5535	2979	165.5
56958	NO	1016	126.99	10.4	45.15	35.95	15.202	12.046	4.833	3.22	234	297	27	654	169	0.727	1.269	0.788	207	3.82	6.9	6.9	23.3	873	825	196	7.48	7.26	0.731	2441	1770	50
56960	NO	1268	124.33	13	79.52	51.42	12.536	17.757	17.354	5.06	362	388	39	263	82	1.076	1.448	1.522	152	5.02	12.3	9.3	59.9	716	1313	266	8.31	7.21	0.794	2134	1852	165.9
56963	NO	1365	172.65	11.4	49.4	56.62	19.053	16.874	16.001	6.83	147	308	252	1787	55	0.761	1.082	0.769	195	0.91	52.1	1.1	126.9	781	906	181	6.82	5.25	0.781	2533	1623	72.6
56965	NO	1802	295.09	21.5	50.19	52.87	10.781	22.401	16.408	5.87	290	651	1175	3757	2	1.713	1.815	1.303	744	3.47	45.9	3.3	218.2	814	1100	277	26.59	9.88	1.259	4768	2489	90.3
56969	NO	2239	358.1	43.3	74.23	65.24	15.492	22.341	22.707	7.55	398	566	10	1828	466	1.105	1.729	1.913	268	2.5	56.8	6.2	29.1	963	2265	535	14.22	11.57	1.64	1809	2898	99.2
56971	NO	2042	232.22	7.9	82.98	86.56	29.293	29.469	20.384	6.15	425	443	20	240	0	1.962	3.223	1.197	332	42.58	24.1	6.1	32.7	1142	2372	250	21.84	12.16	1.574	5122	3043	104.6
56973	NO	2584	413.43	47.8	93.66	73.97	15.752	28.082	22.856	12.16	744	993	228	2792	128	3.576	4.647	7.534	1077	14.41	167.8	7.1	160.5	1245	2210	662	36.16	24.98	2.215	3967	5158	118.2
56976	NO	1206	176.39	8.1	50.25	34.5	15.321	8.877	7.731	3.52	42	60	3	227	32	0.61	0.47	1.017	203	2.23	53	0.9	145.8	525	669	204	8.12	7.3	0.863	2569	1646	76.1
56978	NO	2657	297.09	15.2	102.49	112.26	28.372	38.136	37.367	14.98	210	432	286	2380	225	1.348	1.245	2.21	345	4.67	183	10.5	125	784	1962	274	11.54	6.88	0.956	4240	2935	186
56984	NO	3866	379.4	22.6	174.7	116.82	38.529	46.946	24.262	4.71	124	217	187	951	33	3.01	3.619	3.873	481	4.11	178.7	4.2	144.7	587	2127	498	16.8	20.53	2.013	6186	4737	198.4
57000	NO	1425	135.08	2.4	47.48	15.75	5.232	4.444	3.906	0.99	61	63	0	19	1	0.976	0.824	1.21	257	0.85	0.7	1.9	3.4	591	768	163	5.73	3.65	0.459	2581	1134	80.8
57007	NO	1473	250.76	18.6	43.38	37.86	17.326	8.703	8.777	10.08	544	686	65	1631	138	1.733	1.557	2.585	642	4.15	242.2	5.2	48	994	830	270	21.52	4.84	1.558	2499	2681	72.9
57009	NO	6755	750.55	31	257.58	255.64	108.214	87.475	33.738	11.85	760	839	121	686	351	4.495	5.537	4.937	1183	8.77	425.3	22.9	66	4301	3707	853	38.51	37.47	4.199	8840	7890	442.3
57014	NO	1838	188.57	7.4	55.6	74.35	17.53	22.845	22.739	7.3	95	154	66	654	59	1.084	1.036	1.255	328	1.47	15.9	0.4	126.4	247	817	179	11.86	8.88	0.807	2901	1864	89.4
57022	NO	2260	250.91	10.2	77.24	105.7	36.28	40.84	18.549	7.82	332	461	377	1344	17	1.733	1.771	0.95	365	4.37	32.5	2.8	98.7	711	1026	165	16.85	11.97	0.828	4268	1898	119.7
57028	NO	1745	236.57	25.6	73.45	48.12	19.811	14.836	8.266	6.8	214	523	1053	3192	49	1.138	1.506	1.56	284	3.1	372	0.4	76.3	503	1281	343	11.59	14.19	1.673	2131	2521	136.2
57031	NO	1488	168.75	22.4	90.2	55.01	12.871	19.678	16.466	5.57	216	286	74	798	19	1.024	1.075	2.501	177	1.26	28.2	1.8	52.3	391	1254	319	9.17	6.97	1.267	4142	2405	181.9
57046	NO	1935	199.57	14.5	79.97	94.66	25.961	30.256	30.654	10.82	568	888	806	3408	61	2.017	2.342	3.341	677	8.04	207.4	7.8	59.9	1300	1442	276	18.71	9.96	2.035	4068	3423	106.3
57047	NO	1051	141.87	9.4	27.18	43.65	10.977	16.818	13.08	5.22	291	304	42	129	66	0.734	1.117	1.213	185	1.32	96	3.8	32.7	424	582	148	5.06	3.2	0.635	1054	1769	44.8
57050	NO	941	90.36	12.4	26.49	36.73	17.883	11.468	4.723	1.89	173	205	97	342	8	0.567	0.981	0.226	122	1.19	3.3	0.5	11.8	535	511	204	6.02	3.67	0.664	2006	1016	30.3
57058	NO	2056	303.61	38.7	67.44	36.23	7.322	16.367	9.314	7.75	690	834	121	1642	40	1.784	2.909	3.667	863	9.78	86.5	7.1	33.8	1051	1555	476	16.83	12.83	2.178	2466	3166	108.4
57062	YES	2172	308.05	17.5	102.02	62.68	17.706	25.053	13.064	7.61	228	409	422	1965	36	1.028	1.557	1.679	260	6.58	144.2	9.6	62.3	545	1693	285	15.43	13.22	0.998	4750	2942	156.3
57069	NO	1409	177.88	25.7	90.07	39.59	9.307	13.834	11.979	3.76	34	86	71	571	27	0.752	0.852	1.843	238	6.07	19.8	0.8	55.2	409	1494	325	11.62	13.92	1.089	1443	2386	97.1
57082	NO	1217	132.75	19.3	46.11	32.46	12.45	12.587	5.476	2.01	55	232	696	1782	27	0.597	0.809	1.199	249	1.39	49.6	1.7	12.7	428	882	229	7.98	7.45	1.063	4182	1919	25.1
57093	YES	1848	306.98	14.4	42.88	54.27	20.4	22.256	3.417	1.59	198	430	75	2656	216	1.607	1.538	2.138	369	5.6	154.2	4.2	14.2	522	638	160	15.36	5.94	0.705	3040	2232	54.8
57095	NO	2111	231.74	11.8	87.76	94.91	35.245	40.176	9.17	4.25	238	281	34	488	54	0.698	1.406	1.24	279	6.95	64.3	3.2	24.8	529	1259	375	12.12	15.85	1.03	2657	2090	104.5
57097	NO	1409	221.49	11.9	38.3	44.96	18.103	19.173	4.942	4.87	342	808	1703	4753	0	0.729	1.863	0.849	282	2.91	55.1	5.5	178.8	845	837	257	9.36	5.09	0.823	3218	3114	37.2
57100	NO	2680	264.39	11.6	125.83	127.04	41.404	50.964	24.044	11.14	733	795	0	741	16	1.672	2.109	1.48	381	5.75	12	4.7	54.2	1065	1700	285	19.61	17.56	1.446	4815	2294	186.6
57111	NO	1294	169.96	8.9	42.87	49.51	16.078	17.519	11.627	2.31	475	479	0	64	3	1.877	2.254	1.193	517	4.6	9.6	6.1	15	1100	839	169	15.21	10.38	0.553	2101	1372	76
57113	NO	2932	330.87	27.7	121.34	96.74	30.584	32.828	24.779	8.17	376	660	857	2957	48	3.584	2.113	2.139	594	3.7	26.5	2.6	123.2	1063	1741	410	19.11	12.85	1.516	5844	2872	198.3
57118	YES	666	93.32	6.5	14.71	26.23	11.113	10.738	2.566	2.18	27	260	851	2365	0	0.526	0.481	0.327	128	0.56	27.3	0	87.4	275	322	103	6.75	2.13	0.57	1825	1091	10.5
57119	YES	1445	118.15	13.6	87.41	70	12.909	25.641	25.83	10.76	446	1092	1138	7166	6	4.43	4.833	2.312	466	4.36	53.5	7.7	384.6	1544	1270	296	29.16	10.65	2.863	2837	2005	134.3
57122	NO	1856	283.49	10.9	93.92	36.88	14.165	11.768	4.791	4.03	109	159	45	503	162	1.044	1.264	2.142	316	4.65	184	2.2	46.6	534	1126	360	10.9	17.79	1.185	3616	2725	110.9
57129	NO	821	112.06	12.4	21.59	34.54	6.698	10.602	12.798	6.05	412	513	175	1097	14	0.839	1.481	1.517	228	1.05	114.9	1	89.1	385	450	188	9.41	4.41	0.646	1360	2069	26.3
57136	NO	3568	427.07	16.6	114.91	160.55	54.123	58.415	37.392	15.8	1472	1508	3	442	5	2.528	3.765	2.353	483	9.17	25.4	13.1	96	1728	2412	480	17.68	11.9	2.163	5451	5029	150.7
57137	NO	1588	234.34	26.8	69.21	28.01	8.886	7.655	7.402	4.18	116	1196	4593	10647	34	0.946	1.036	2.626	270	1.73	185.8	1.6	95.6	414	1080	315	9.65	8.01	1.188	3602	3020	78.5
57145	NO	2135	263.03	9	83.06	87.39	37.054	28.294	15.036	3.43	562	578	22	180	5	1.593	2.505	1.215	211	4.46	3.7	9.3	25.4	1410	1595	365	9.47	11.29	1.293	3060	2724	108.4
57146	NO	1705	192.22	34.4	86.22	76.16	21.587	22.439	24.83	7.96	274	397	111	1423	9	2.374	2.369	2.338	415	5.06	58.8	2.6	150.1	894	1216	221	17.69	14.41	0.99	4540	2484	121.4
57152	YES	2531	390.37	32.8	94.57	62.81	25.146	20.857	10.642	7.75	775	871	33	1097	62	3.112	3.411	3.348	561	7.73	60.3	11.9	141.9	1338	1855	456	25.15	13.65	1.878	2709	4013	119.2
57154	YES	3986	475.63	45	117.58	150	35.769	59.801	43.563	17.87	200	545	848	3455	528	1.859	2.773	2.963	620	7.38	381.9	1.6	245.1	861	2062	495	18.17	16.35	4.646	5229	5718	150.1
57160	NO	5187	440.5	18.7	242	180.7	62.629	73.04	35.557	8.49	549	627	74	894	57	4.102	4.474	4.212	789	11.56	168.5	7.6	101.9	1306	2690	553	29.38	24.25	1.776	10841	4389	270.8
57164	NO	1776	196.35	6	88.08	70.17	29.384	22.618	10.319	3.57	775	805	0	382	1	1.786	1.8	2.296	375	7.92	6.5	1	51.4	510	1072	177	18.12	15.26	0.897	3373	1560	120.7
57165	NO	3011	401.99	16.9	123.54	104.2	29.437	37.228	25.685	7	384	445	104	651	129	1.549	2.111	3.01	241	3.16	499.3	3	105.2	799	1719	358	15.07	12.63	1.158	5950	5012	145.2
57175	NO	2774	378.06	31.3	79.96	97.07	19.381	40.348	29.627	13.03	730	1262	2024	5331	81	2.099	2.492	3.444	650	2.47	112.6	0.4	185.9	733	1371	456	24.41	12.15	1.733	3717	3940	107.4
57178	NO	2366	288.43	15.7	115.91	86.33	34.151	28.457	16.29	9.38	1608	1647	38	467	10	3.806	4.433	4.303	872	14.42	67	10.8	43.9	1708	1726	342	36.33	17.41	1.627	4238	3233	139.4
57181	NO	1931	197.87	14.3	68.63	97.54	36.383	35.327	12.774	5.71	539	582	7	478	3	2.057	2.73	1.194	432	6.25	34	2.2	40.3	1108	1279	231	22.22	13.1	1.533	3395	1840	125.2
57185	NO	2733	302.18	36.5	98.49	131.72	61.876	44.515	18.957	10.72	661	1115	878	4853	295	1.504	1.683	1.494	422	1.57	159.9	1.5	165.8	2467	2142	327	15.86	11.79	1.418	6056	3290	109.9
57193	NO	1067	181.75	18.4	33.25	27.06	13.949	6.977	3.59	1.56	216	246	8	340	38	0.608	1.035	0.613	111	1.34	85.6	4.1	19.3	1154	1013	191	5.15	4.73	0.652	930	1217	36.1
57198	YES	2315	341.47	31.9	102.8	60.94	18.828	21.758	14.682	7.92	676	1552	3492	8771	10	3.036	3.788	3.454	1126	9.14	167.8	5.7	167.4	1506	1838	476	25.81	23.57	1.925	5500	4182	199.4
57208	NO	4499	588.92	147.6	222.4	163.81	26.847	91.737	34.891	39.81	319	1891	142	17832	1873	4.456	2.673	8.238	1916	11.15	1200.8	4.9	783.8	2215	3804	1540	45.94	31.19	6.647	14205	14666	243.2
57214	NO	2733	355.26	17.9	98.27	103	32.659	36.243	20.747	8.42	211	317	1	1260	1	1.774	2.138	1.566	504	6.19	79.7	5.1	237.4	1420	1726	288	20.44	17.25	1.519	5854	2535	133.6
57223	NO	1626	195.77	19	63.59	55.55	11.242	22.168	16.975	13.2	280	856	2179	5801	43	0.999	1.663	1.174	212	3.13	109.5	7.9	64.8	742	1232	347	8.94	7.48	1.223	2419	2936	94.8
57226	NO	1058	107.69	7	43.83	39.64	12.628	16.611	7.526	2.17	86	104	31	201	3	0.806	0.663	1.241	138	0.85	29.2	0.4	24.9	426	628	130	4.96	4.78	0.663	2255	1519	49.8
57237	NO	2344	308.67	5	109.69	74.47	22.108	28.325	18.859	6.75	353	368	1	183	8	1.985	1.71	2.274	251	3.9	7.1	3.4	52.1	505	1377	169	10.63	7.72	0.652	4498	1650	172.7
57238	NO	2790	188.43	20.2	172.6	154.32	31.255	66.274	45.072	13.86	624	671	17	507	126	1.634	2.39	3.008	544	3.8	33.3	1	84.1	905	2263	539	23.23	22.51	2.448	5213	3306	260.2
57246	NO	2942	245.23	27.8	139.19	151.91	48.394	47.428	41.268	10.67	453	1064	139	7280	11	1.795	3.182	2.377	484	8.84	162.9	5	174.7	1819	2420	531	24.97	20.25	3.426	4425	5148	181.4
57259	NO	6058	1182.13	18.9	182.42	77.96	30.419	26.359	5.096	6.28	648	703	40	663	6	2.11	4.646	3.928	471	17.87	135.6	9.4	232.8	1368	2085	460	32.07	40.73	1.749	5611	4727	140.1
57263	NO	3515	407.52	38.6	86.24	144.07	38.695	46.424	46.895	17.47	485	2679	8931	21843	14	2.595	3.017	1.818	855	2.1	83.9	2.8	318.4	744	1493	433	19.83	11.42	1.719	3614	3539	216.2
57267	NO	9165	1075.06	63.2	268.63	430.43	159.543	144.956	91.185	28.01	1128	1553	1435	4300	174	3.624	5.322	3.97	1049	13.38	126.1	10.2	229.9	3859	5111	966	60.7	39.89	4.221	13299	8442	427.3
57268	NO	2057	283.32	14.9	73.54	72.22	30.597	26.127	10.242	3.85	795	810	0	185	10	0.988	2.513	1.093	435	4.99	158.4	11.4	24.1	1690	1620	234	11.47	10.59	0.94	2165	2562	87.5
57294	NO	3667	398.61	8.4	83.57	64.61	26.771	22.385	9.704	4.57	390	425	39	318	221	1.639	2.709	3.239	546	3.85	157	5.4	22.2	872	1559	437	9.37	6.88	1.122	2696	3342	138.3
57295	NO	3069	407.03	14.2	105.24	116.16	39.673	43.862	21.104	7.33	417	474	124	599	74	2.532	3.271	2.258	452	4.71	118.4	3	65.9	634	1946	257	17.78	14.71	1.109	4682	3074	131.5
57296	NO	2850	286.03	13.6	96.7	126.89	46.388	39.419	30.27	8.76	487	602	392	1167	18	1.867	1.558	2.675	508	9.47	33.3	14.1	87.1	838	1386	253	16.25	13.06	1.135	4789	2559	126
57301	NO	1851	253.6	6.4	83.52	55.53	17.698	20.386	12.702	4.57	270	272	1	20	17	1.105	1.127	1.351	330	8.19	3	13.1	12.5	701	1145	277	10.14	6.84	0.998	3643	1561	149.9
57302	NO	868	118.07	18.8	31.55	35.68	6.968	10.336	16.382	4.2	217	727	1954	5136	0	0.91	1.582	1.463	203	1.67	74.6	4.1	95.9	801	808	288	6.18	4.69	0.813	861	2755	28.9
57305	NO	2883	356.84	38.8	136.86	109.99	31.32	42.763	27.097	13.86	253	393	232	1565	4	1.877	2.455	2.436	501	7.01	282.9	2.9	99.7	826	1817	509	19.89	22.61	2.111	3939	4592	158.6
57308	NO	2185	199.73	34.2	107.65	104.19	33.278	40.996	20.312	16.14	746	1042	357	3320	48	1.366	1.985	4.146	604	6.24	137.4	3.6	247.8	1110	2077	579	24.17	13.55	2.249	3985	4179	98
57311	NO	1094	143.39	19.6	38.41	42.67	11.78	19.442	8.181	4.37	32	79	115	315	416	0.916	0.904	1.169	312	1.57	98.3	0.3	36.9	355	609	214	8.57	6.59	1.076	1883	2316	48.2
57343	NO	3756	565.44	23.6	60.97	147.4	43.536	59.314	35.669	16.67	436	469	84	229	244	1.138	1.324	1.407	499	1.31	323.9	1.3	72.2	928	1154	421	8.78	7.97	1.568	3309	3132	41
57353	NO	1884	269.53	18.7	87.41	51.64	26.881	14.964	5.972	3.97	594	1070	2036	4753	10	1.687	2.652	1.031	297	6.3	30.6	10.8	33.6	1626	1674	252	17.48	17.41	1.442	4782	2955	102.2
57358	NO	1140	143.3	18	23.79	56.29	12.03	30.937	9.634	6.36	113	346	579	2501	58	0.7	0.756	0.801	356	0.17	22.5	0.2	73.3	208	392	125	7.11	4	1.006	2015	2045	32
57362	NO	1563	217.97	15.8	47.92	57.06	21.616	17.956	11.501	9.31	303	464	12	1906	42	1.851	2.197	1.642	797	4.08	90.1	3	121.8	567	836	270	18.41	12.37	1.334	3904	2557	120.3
57364	NO	1669	148.81	10.5	65.45	71.07	20.043	24.379	20.209	13.59	436	490	137	540	21	0.448	0.705	3.648	148	8.92	19.4	1.1	106.6	261	766	226	11.29	11.67	0.842	2432	2888	83.7
57368	NO	4004	375.43	33	171.99	190.4	58.193	85.571	34.48	13.22	600	657	85	616	70	4.25	4.126	3.333	895	7.01	80.1	10.6	94.2	924	2367	387	28.6	20.41	1.844	6695	4423	290.3
57369	NO	1902	183.31	8.4	120.98	75.92	28.867	30.205	9.481	6.04	867	922	28	678	47	2.896	4.713	4.956	610	18.05	51.4	13.4	28.4	1288	1569	245	38.68	19.05	0.894	3517	3007	110.6
57374	NO	5208	670.93	31.5	168.71	166.83	64.715	56.388	25.063	18.78	599	804	62	2419	1	2.141	3.526	3.319	466	11.48	146.2	4.7	341.8	1567	2977	1117	19.91	30.44	2.478	7193	5239	269.8
57382	NO	2851	321.01	26.5	115.85	121.81	37.266	51.482	23.567	7.83	378	680	1063	3096	13	2.657	2.386	1.961	563	5.14	24.9	3.1	146.3	1260	2038	348	23.3	18.48	1.485	5763	3272	130.3
57383	NO	3739	489.12	33.1	153.48	134.51	47.115	50.633	22.24	5.76	527	1435	3781	8913	238	2.897	3.474	4.389	659	8.26	514.9	9.3	58.8	1207	2001	487	37.94	34.3	2.759	5384	5282	166
57390	NO	3073	329.96	18.9	132.89	141.3	57.467	53.797	20.371	8.98	667	962	738	3175	28	1.419	2.426	2.609	340	10.04	121	4.9	62.5	1065	1977	327	24.8	32.2	2.329	5325	4196	145
57393	NO	821	118.48	4.3	45.32	16.67	5.912	6.368	2.251	0.68	83	84	8	20	1	0.656	0.498	0.865	210	0.36	48	1	3.4	315	649	129	5.1	2.71	0.462	2087	835	72.2
57396	NO	2032	206.2	10.1	140.65	69.83	24.971	28.08	9.835	6.36	540	548	10	67	39	1.478	2.838	2.127	252	7.28	28.7	13.2	8.6	900	2006	339	18.59	9.43	0.818	4508	4081	246.9
57411	NO	2884	380.35	17.5	117.36	99.1	30.368	35.428	23.235	9.73	595	1017	1	5061	7	2.741	4.001	2.548	744	4.87	105.7	5.8	510.4	1282	2360	493	25.42	13.13	1.533	7505	3780	165.6
57417	NO	2254	239.69	16.1	109.51	96.49	27.322	34.029	25.749	5.21	508	673	608	1680	77	2.279	2.522	2.634	567	8.37	61.4	6.3	139.7	1056	1578	300	20.43	21.45	1.401	6301	3184	156.5
57418	NO	2844	410.02	31.6	82.89	106.58	36.858	39.422	18.123	4.16	223	319	130	791	542	2.163	1.567	1.757	432	3.49	68.5	3.5	97	900	1639	508	16.56	14.99	2.092	6217	4320	112.8
57439	NO	3306	211.66	9.5	136.62	214.01	67.263	77.999	46.076	16.33	257	519	956	2625	5	1.472	2.204	2.126	243	16.24	177.2	5.1	153.4	1230	2348	323	18.86	17.3	1.893	7630	2623	163.6
57441	NO	1904	281.85	13.8	74.41	58.64	18.802	21.441	8.566	4.07	636	657	63	238	2	2.861	3.879	4.465	522	12.65	60.7	6.6	67	653	1068	228	32.18	13.79	1.263	2459	3776	81.7
57449	YES	866	94.1	3.5	23.61	43.82	11.426	15.91	12.569	2.69	46	85	94	411	4	0.644	0.826	0.487	122	0.86	38.1	0.7	24.4	365	347	71	5.17	2.88	0.259	1256	930	32.4
57450	NO	2645	395.09	29.1	73.95	47.55	10.096	19.293	14.29	20.19	317	565	202	2813	160	3.582	3.342	4.127	900	11.33	261.5	4.5	69.8	596	1244	504	36.24	24.49	1.664	3438	4228	123.3
57452	NO	1778	210.09	29.4	89.28	58.22	21.58	21.542	9.186	20.81	1430	2619	3670	12389	18	1.881	3.544	3.325	495	8.48	325.1	11.1	359.6	2065	1989	418	17.1	15.47	1.787	3784	4424	80.4
57454	NO	1835	299.59	2.6	41.83	57.82	26.693	19.957	5.513	1.05	510	522	0	74	0	0.818	2.122	0.439	111	5	0.1	13.8	11.6	1313	1213	150	4.91	5.38	0.582	879	1686	49
57456	NO	4191	588.72	32.7	142.33	147.84	32.133	58.769	48.098	14.44	148	153	0	94	3	2.027	2.314	4.648	713	4.09	98.4	1.1	124.9	819	1748	564	17.19	16.28	2.841	6589	6809	130.9
57466	NO	4764	428.3	34.9	166.56	147.41	44.862	60	29.826	16.11	853	1624	2681	7853	99	3.024	3.118	4.353	1011	8.79	256.7	7.5	262	1547	2435	487	33.97	30.05	2.165	9010	5057	198.6
57470	NO	1283	216.02	2.7	52.91	21.81	7.368	7.106	3.943	1.48	24	24	0	0	0	0.596	0.357	0.681	186	0.38	0	0.2	6	98	427	93	6.99	4.92	0.503	1300	582	55.7
57471	NO	1393	232.45	18.8	38.17	37.4	12.747	10.726	11.378	4	191	196	0	79	3	1.481	0.83	1.539	265	2.16	24.9	1.1	32.7	348	741	273	9.34	4.7	1.228	2535	2125	95.1
57472	NO	1719	252.47	11.4	54.54	57.05	21.124	17.086	14.493	4.71	198	251	66	531	96	1.428	0.977	0.924	378	3.24	213.4	2.6	48.9	623	863	210	10.86	5.78	0.913	2445	2037	114.8
57474	NO	1572	275.03	43.8	62	35.31	7.952	13.337	11.143	4.64	515	595	141	807	156	1.7	1.941	2.684	515	3.44	51.8	3.2	29.7	486	1372	495	29.27	11.87	2.647	3906	3613	67.4
57475	NO	1896	196.27	9.1	81.31	88.3	25.072	31.105	24.961	7.95	243	257	24	152	15	1.252	1.426	0.95	253	8.46	3.4	9.6	62.8	696	1294	227	13.41	6.13	1.103	2925	1756	116.3
57482	NO	3247	260.53	20.2	165.15	178.74	48.83	74.822	40.135	10.17	137	176	22	453	7	2.45	2.729	3.313	422	6.72	34	3.8	125.6	1182	2498	631	28.31	23.85	3.853	4972	4456	229.4
57489	NO	3470	495.95	20.5	66.43	142.46	75.577	31.241	19.452	6.77	703	736	4	401	14	0.796	2.445	1.993	137	4.52	44	6.4	45.1	1321	1633	371	9.27	12.79	2.071	2992	3763	57
57492	NO	1734	253.76	17.2	41.57	50.12	20.419	17.337	8.859	5.56	239	804	945	6307	3	0.737	1.015	1.461	362	1.01	75.1	1.3	284.9	682	931	291	10.01	6.1	1.169	2334	2335	38.9
57524	NO	3016	384.97	12.3	77.63	106.28	40.069	39.478	14.428	5.17	244	274	44	314	12	2.081	1.492	1.666	387	4.87	14.6	1	39.3	421	1112	225	16.46	12.92	0.905	3361	2074	105.2
57528	NO	1932	315.71	20.2	57.33	51.85	12.691	19.686	12.027	11.06	117	277	2	1774	234	1.865	1.763	1.32	405	1.49	23.8	0.5	69.7	389	1018	206	12.82	6.99	1.287	3152	1959	119.9
57533	NO	1576	134.16	11.6	76.74	80.39	22.931	31.476	18.846	8.44	218	258	0	462	9	1.672	2.215	1.74	239	2.72	27.9	3.8	51	447	1168	216	9.72	8.98	1.06	3791	3022	115.2
57534	NO	2848	243.28	27.9	133.13	106.54	32.515	48.513	14.942	8.72	43	252	653	2145	90	1.383	2.194	3.592	484	6.97	65.5	1.2	99	545	1883	468	16.84	23.02	1.386	2431	3588	148.7
57535	NO	2517	341.4	21.2	100.19	86.92	44.924	28.521	5.625	13.53	607	703	22	1091	61	3.804	5.308	4.327	852	11.89	169.6	8.7	108.1	1713	1985	371	27.26	28.24	1.859	2977	4844	130.5
57536	NO	3203	273.04	35.5	117.61	193.08	50.524	84.279	44.328	19.77	380	587	94	2351	205	2.371	2.515	2.122	629	3.72	141.3	4.1	94.5	1357	1941	582	17.99	14.96	2.441	4935	4414	136.4
57537	NO	2748	413.15	11.6	72.57	80.84	30.799	25.29	16.196	4.38	304	348	3	510	2	2.064	1.275	0.679	558	2.77	14.8	0.3	53.8	974	1217	175	14.45	8.78	0.659	4038	1211	111.5
57541	NO	2557	451.71	31	59.99	62.77	16.339	22.359	12.3	7.6	129	504	143	4216	424	2.186	1.439	2.274	830	1.94	313.5	5.1	239.1	1762	1077	325	18.33	7.99	1.569	2887	3723	98.5
57549	NO	1575	251.96	28.1	85.4	31.79	11.929	10.717	5.753	8.92	1132	1174	115	455	40	2.79	4.438	4.616	706	10.62	61.5	10.2	27.2	1363	1783	359	31.48	21.59	1.078	2562	3817	125.9
57550	NO	1291	146.45	7.1	45.35	61.04	22.271	18.528	15.749	5.49	354	370	60	123	15	0.802	1.621	1.024	201	3.18	23.4	8.6	39.1	941	865	166	5.1	5.74	0.66	1628	2306	59.5
57553	NO	2378	358.74	34.1	119.23	53.92	12.18	16.992	15.082	9.14	101	2227	8330	21284	125	3.139	1.966	2.758	733	1.5	214.4	2.4	297	1345	1789	427	18.83	10.84	1.525	4726	3566	236.8
57555	NO	2555	333.28	14.4	97.04	92.78	28.907	33.648	22.505	6.67	312	585	1158	2703	11	2.289	2.538	1.081	445	5.8	17.6	7.5	36.9	1482	1393	196	21.33	14.83	1.3	4777	2358	147.8
57557	NO	2811	320.07	12.5	113.02	124.35	48.308	45.301	20.812	6.83	934	969	19	423	100	2.301	3.813	1.749	289	8.17	22.5	15.6	43.5	2034	2267	314	9.57	17.28	0.914	4984	3635	152.7
57558	NO	2471	336.01	17.3	64.94	98.17	40.19	35.799	14.816	4.6	824	854	32	236	210	1.58	2.631	2.165	582	4.36	32.6	4.5	43.7	805	1150	231	16.5	14.24	0.971	2302	2411	68.9
57560	NO	1923	225.22	10.1	42.47	27.77	9.607	11.361	4.908	1.79	127	172	6	526	27	1.386	2.207	1.617	359	1.38	12.1	1.6	19.4	381	1121	306	7.91	4.69	0.62	1435	2164	63.6
57561	NO	2271	273.13	11.1	67.72	76.92	22.414	32.938	17.214	1.55	0	29	46	343	9	1.168	1.211	1.412	328	6.57	6.6	0.5	64.7	427	797	222	14.91	14.04	0.88	2233	1882	100.7
57569	NO	2066	250.07	17.6	83.6	71.99	29.29	24.503	11.395	13.05	12338	12413	17	837	65	0.841	6.629	2.643	517	131.56	25.7	3.7	44.6	653	1678	333	13.72	13.77	23.391	1917	2290	107.2
57577	NO	1817	253.5	21.2	96.86	47.84	18.147	15.516	8.538	2.47	119	153	56	194	320	4.97	1.4	2.181	545	6.54	186.6	1.6	17.4	1068	1290	312	15.7	18.1	1.265	3025	3120	111.4
57584	NO	2494	189.92	17.8	123.15	106.46	37.674	40.112	21.877	10.98	292	1183	190	10570	42	3.718	3.144	3.311	485	2.73	59.7	3.7	975.2	746	1836	424	15.55	13.58	1.76	8494	4672	173.9
57587	NO	1884	224.42	16.8	75.09	78.36	27.238	27.118	18.736	7.41	399	517	52	1254	281	1.502	1.346	1.203	454	9.06	125.5	7.8	50.1	1661	1671	286	13.74	8.21	1.311	4178	2456	113.9
57589	NO	3226	374.55	31.1	145.64	111.8	44.453	32.225	24.849	10.31	715	1441	2825	7181	229	1.967	2.404	3.317	680	6.29	138.6	3.2	72	2212	2673	513	16.03	18.48	1.823	4788	3977	194.4
57596	NO	1012	139.2	16.5	41.25	35.71	9.487	10.734	12.255	7.27	322	1050	2622	7368	132	1.156	1.548	1.814	338	4.26	91	2.9	145	500	684	225	13.75	10.6	1.215	1275	2281	38.4
57597	NO	3184	362.45	26.8	109.54	150.55	52.683	50.319	35.662	16.28	959	1838	1768	9597	65	2.568	3.473	2.8	780	6.63	175.4	4.2	247.7	2107	2316	411	22.45	13.55	1.708	4808	3761	116.6
57599	NO	1760	241.26	15.7	53.82	68.32	34.055	18.552	9.96	3.85	515	635	36	1367	122	1.047	1.939	0.92	191	3.46	109.4	4.3	39.1	1146	1192	220	6.27	7.36	0.771	2443	3002	74.7
57601	NO	2303	204.8	12.4	167.09	64.28	31.002	19.715	4.237	3.49	53	87	84	368	3	0.958	1.435	3.592	179	10.02	190.4	2	56.4	602	1604	302	18.1	31.85	0.98	3102	3551	197.7
57608	NO	2372	496.26	0.6	50.45	27.08	6.762	10.28	6.898	1.31	44	44	0	0	0	0.353	0.293	2.498	35	14.65	0	0.4	8.4	509	760	123	8.1	2.87	0.426	1440	686	48.8
57612	NO	2930	267.07	9.9	105.65	117.6	44.435	45.356	16.467	6.6	411	438	8	317	17	1.498	2.632	2.25	382	7.83	38.3	1.7	36.2	882	1501	350	13.29	19.87	1.033	3501	3166	105.8
57636	NO	3518	384.15	21.6	90	40.47	16.176	12.462	6.908	5.23	501	759	599	2611	414	2.704	3.957	4.685	856	6.11	234.5	6.3	42.9	1198	1848	555	16.17	12.29	1.147	2675	4758	98.8
57643	NO	4758	540.38	25	125.31	223.02	86.442	78.487	39.222	11.84	1422	1450	10	310	40	3.898	4.375	2.248	857	5.64	21.9	12.9	75.4	2162	2646	344	30.46	12.34	1.436	7294	3115	226.9
57648	NO	2054	264.53	17	94.09	70.33	23.478	29.738	10.761	5.23	94	123	0	360	1	1.65	2.058	1.82	315	6.53	39.8	1.5	37.7	674	1662	264	17.52	16.88	1.258	5130	2664	98.9
57651	NO	1793	270.72	12.8	54.46	55.37	15.464	20.18	16.24	6.34	335	846	3010	4633	20	1.441	1.452	0.999	384	2.31	30.3	4.6	41.8	902	1060	226	13.46	7.1	0.956	3473	1590	108.1
57653	NO	2819	332.64	37.3	102.43	125.84	27.544	49.629	38.253	19.74	1340	1428	139	958	40	2.419	2.48	2.649	971	5.99	67.3	5.6	195.4	888	1636	460	31.98	27.81	2.9	5687	4641	108.4
57659	NO	1679	279.72	47	55.16	44.89	6.696	15.407	20	9.04	129	448	972	3266	210	1.571	1.048	2.01	931	0.87	218.5	0.4	129.6	274	1175	380	19.31	8.59	1.883	2064	3399	80.2
57661	NO	2895	419.56	28.5	90.37	94.99	38.176	28.611	15.669	17.03	166	331	49	1908	2	2.963	2.837	2.875	1259	3.32	21.9	3.1	98.8	655	1469	412	29.51	19.55	1.801	4460	3735	214.7
57665	NO	2767	398.93	38	137.18	72.27	25.292	25.666	13.858	7.14	417	592	129	1962	201	2.528	2.742	2.893	740	7.43	300.7	13.7	137.6	2931	2733	515	20.44	18.89	1.905	3388	4856	168.5
57669	NO	1594	259.11	17.2	56.26	40.54	7.594	12.689	15.639	5.16	1085	1285	790	1965	30	2.443	3.007	3.233	520	8.46	110.9	7.1	132.7	1052	1075	265	23.83	20.83	1.05	2452	2243	61.5
57677	NO	2310	377.44	36.2	106.94	45.96	18.248	13.565	9.263	5.17	1449	1769	1005	3299	103	3.515	4.394	5.896	1142	16.31	87.1	16.2	95.8	1832	2232	620	67.12	19.07	1.78	3975	3586	112.1
57685	NO	2174	266.1	10.5	59.52	99.5	37.067	33.896	20.365	4.92	177	187	0	91	34	0.738	0.796	0.736	225	1.89	12.1	0.6	50.9	794	952	129	8.19	6.31	0.769	2620	857	89
57688	YES	1966	199.27	10	97.33	88.32	37.421	32.569	7.984	6.2	514	546	14	349	62	1.605	1.989	1.98	438	8.12	77.2	6.2	22.3	1103	1453	264	22.71	20.62	1.029	2785	2787	119
57689	NO	1908	228.43	18.9	67.45	69.67	17.981	29.978	13.771	12.47	215	326	59	1230	160	0.985	2.099	2.161	342	3.77	28.8	1.8	83.2	804	1267	398	11.92	10.59	1.582	1897	2745	60.7
57691	NO	2705	311.27	25.9	102.14	95.65	31.201	32.786	23.236	6.56	430	570	500	1445	10	1.566	1.951	1.918	576	2.37	125.9	3.2	109.6	512	1591	414	15.89	11.03	1.418	4579	3061	165
57709	NO	1453	159.43	11.3	59.05	66.1	28.842	21.878	9.069	2.02	573	596	16	241	24	1.419	1.85	1.538	311	7.29	12.5	7.8	22.6	1552	1131	219	17.27	8.42	0.731	2673	1472	86.7
57715	NO	1954	258.3	14.4	82.3	70.07	17.765	26.147	21.292	5.8	476	487	56	128	4	1.603	2.14	3.733	449	4.99	58.9	5	44.9	557	1025	270	17.4	9.33	1.026	2670	3185	81.1
57717	YES	1524	249.41	27.3	47.11	43.16	15.236	14.076	10.553	5.01	121	135	104	128	0	1.094	1.349	2.008	389	1.02	37.1	3.4	34.9	605	783	357	14.22	6.69	1.461	1501	3366	51.8
57720	NO	1880	262.98	31.2	74.93	64.95	15.044	20.724	24.285	7.33	314	561	465	2699	66	1.653	1.927	1.69	240	2.71	57.7	6.3	183.6	1387	1754	438	13.04	10.14	1.257	3488	2500	156.1
57732	NO	1018	129.99	8.8	56.13	31.71	12.86	8.088	7.478	4.39	374	2144	7753	17174	426	0.645	1.734	1.758	118	3.59	26.2	6.8	60.2	757	951	175	2.53	4.8	0.448	2318	2470	66.7
57734	NO	2473	437.11	31.3	112.26	38.71	8.213	15.305	10.942	8.52	1419	1882	1467	4701	257	4.963	6.741	7.695	1563	20.27	117.9	16	91.2	1706	2056	414	61.51	22.49	2.113	6158	5464	163.9
57737	NO	2609	236.35	19.6	181.85	99	38.771	40.661	12.175	4.6	143	167	9	303	0	2.938	2.194	2.991	461	9.2	20	3.7	35.2	581	2124	329	17.58	18.96	1.378	6240	3650	245.1
57744	NO	1630	212.17	20	44.32	47.83	13.121	21.629	9.549	2.48	52	74	8	246	61	0.707	0.902	1.552	174	3.39	105.6	1	41.6	342	675	222	7.24	7.53	0.841	1307	2714	54.9
57753	NO	1456	246.15	5.3	57.81	30.79	9.973	9.521	5.692	6.7	1025	1042	28	121	164	1.587	2.28	2.329	470	9.03	62.8	9.3	34.6	1062	1285	305	20.75	16.62	1.336	1908	1878	66.8
57756	NO	1998	247.77	7.6	126.53	52.38	18.678	16.692	12.611	5.5	193	284	204	978	0	1.469	1.619	1.795	437	2.38	36.7	3.2	49.7	826	1363	316	14.7	15.93	1.183	3866	1952	174.2
57765	NO	3128	358.26	20.6	119.07	93.18	26.022	34.489	25.662	14.19	273	849	2172	5800	64	7.123	3.728	4.169	961	8.15	164	3.2	164.2	1165	1833	495	26.34	19.81	2.108	4783	3236	157.5
57780	YES	1502	165.35	7.7	54.94	69.77	24.381	26.351	13.098	3.76	324	335	2	122	9	0.931	1.625	1.382	160	4.05	25.8	5.7	38.4	827	1031	166	6.82	8.91	0.727	1929	2273	59.5
57781	NO	1640	154.08	8.2	78.79	79.87	20.097	27.641	26.344	9.82	628	685	91	574	154	1.228	1.976	1.688	305	5.25	144.6	10.3	77.5	589	1154	189	11.71	6.35	1.036	2559	2639	175.2
57785	NO	4249	446.89	40.3	146.76	176.85	53.208	57.53	51.48	22.02	387	557	43	1952	48	2.265	2.287	2.755	630	7.51	57.1	2.8	221.7	1904	2713	489	26.37	20.38	2.338	10302	4791	179.5
57787	NO	2175	230.95	9.7	79.62	103.91	44.499	31.642	16.909	8.31	1090	1131	2	397	1	2.274	3.844	2.29	548	11	23.8	17.4	44.1	2324	1730	308	14.97	14.99	1.539	3083	2755	122.1
57800	NO	2525	302.92	21.7	124.21	94.12	36.498	29.447	19.882	5.22	697	1257	1064	6117	183	2.095	3.102	2.055	491	9.46	173.3	11.7	114.6	2106	2228	449	17.31	21.24	1.299	3614	4378	147.6
57802	NO	1139	137.64	10.2	79.28	30.98	13.342	10.733	3.786	1.93	476	502	11	280	107	1.906	2.985	2.516	459	11.1	58.8	7.3	19.7	701	1066	180	20.33	22.25	0.597	2449	1653	90.2
57815	NO	2121	185.03	12.8	118.96	99.34	32.222	35.564	21.912	10.88	839	929	257	918	66	1.933	2.003	2.231	316	4.04	73.3	6.6	74	997	1843	244	11.71	12.22	1.013	5701	3183	200.4
57818	NO	2749	332.12	28.4	90.07	123.33	42.357	37.061	33.71	9.49	538	1292	344	8725	257	1.806	3.371	1.472	650	1.95	161.1	7.4	511.2	2036	1882	444	16.59	10.8	1.704	4803	3978	110.3
57822	NO	2506	210.69	19.6	129.38	116.67	45.288	44.861	13.353	5.12	357	1079	2982	6708	945	1.984	2.116	2.155	341	9.32	135.5	5.7	44.8	1155	1535	268	18.16	22.78	1.175	3214	3302	129.3
57831	NO	2082	178.83	8.1	85.04	114.71	45.157	46.228	15.084	6.14	434	583	596	1432	142	1.38	1.745	1.526	263	2.87	181.6	5.3	88.6	1196	1554	201	8.2	9.11	0.831	4098	2343	102.8
57833	NO	1963	225.45	8.5	101.82	72.84	18.595	26.889	22.029	11.95	410	472	60	693	52	1.509	1.696	1.585	409	13.02	40.9	4	63	984	1561	247	12.07	17.25	3.307	4557	2361	207.3
57838	NO	853	136.15	14.8	29.55	22.96	7.559	10.096	4.314	2.36	7	146	354	1493	19	0.701	0.549	0.538	294	0.38	46.7	0.2	15.6	241	454	125	7.28	4.09	0.824	2865	1408	30
57842	NO	2275	277.38	18.5	77.84	87.21	34.55	29.827	15.461	10.51	973	1027	1	681	1	2.487	3.469	3.669	441	11.16	83.7	5.4	69.6	1323	1799	341	21.95	11.54	1.146	3635	2966	115
57843	NO	6042	545.72	54	228.56	337.55	84.389	133.528	84.303	31.73	745	1527	1489	8452	307	3.116	3.494	4.448	743	7.89	56.3	6	678.9	1607	3681	801	32.81	32.91	2.857	9813	5223	272.3
57844	NO	2601	237.73	18.4	131.35	127.33	42.837	45.356	26.557	6.04	586	630	23	492	167	1.819	2.273	2.594	405	7.04	32.5	6.6	51.1	1491	1999	356	12.59	14.39	1.626	5956	3331	167.4
57847	NO	1028	158.65	8	25.99	33.64	10.383	12.671	7.848	3.9	0	19	13	213	22	0.569	0.337	0.472	208	1.12	8.9	0.3	34.3	146	454	102	10.14	4.54	0.592	1659	837	27.7
57848	NO	2549	424.28	11.8	75.53	62.98	17.146	26.575	12.506	4.46	280	312	4	397	1	2.053	2.055	2.386	511	1.96	522.1	4.9	61.2	799	1188	369	12.85	8.13	1.648	2772	3306	82.1
57850	YES	2433	280.95	14.3	63.19	91.31	29.901	35.861	18.087	10.32	390	397	0	61	0	1.976	2.098	1.501	397	1.53	16.2	1.3	24.2	474	1458	373	13.35	8.83	1.528	3220	2337	57.3
57875	NO	1922	135.89	10.4	67.96	121.95	23.702	37.215	50.528	12.5	298	678	48	4550	1	1.264	1.502	2.179	344	3.51	24.7	1.1	439.8	840	1388	262	10.24	4.58	0.851	4296	1711	78.4
57876	NO	2577	382.89	26.4	98.51	79.11	39.467	23.646	8.045	13.14	887	996	15	1291	4	2.839	4.403	3.418	935	9.82	133.1	11.7	19.5	1909	2002	486	41.23	26.69	1.757	3165	3478	151.1
57877	NO	3770	332.62	10.1	99.54	117.94	45.649	40.526	21.35	10.26	795	842	0	552	26	1.855	3.557	2.77	647	4.56	24.7	8.3	49.2	820	1859	409	19.85	9.67	1.375	3741	3229	192.7
57878	NO	2904	318.77	18.3	95.91	108.82	42.776	40.785	15.529	8.29	759	1253	283	5434	751	1.483	2.029	2.229	441	5.78	114.1	2	58.7	877	1390	306	18.66	16.86	1.242	3179	2502	122.8
57890	NO	934	115.93	12.8	49.56	30.66	10.061	11.706	5.727	1.69	81	114	0	403	0	1.316	0.928	0.666	135	1.34	54	2.5	23.7	418	847	242	6.71	7.64	0.719	2149	1776	81.6
57893	NO	4299	586.75	49.7	260.85	104.1	27.769	36.821	24.741	8.46	366	397	51	286	174	3.777	3.553	5.807	625	4.92	217.7	14	31.3	2520	4052	768	24.05	25.34	2.4	4625	5860	315
57898	NO	617	13.94	0.6	33.4	46.43	16.913	21.839	4.736	0.37	7	7	0	4	0	0.826	0.442	0.611	29	2.22	0	1.7	2.2	73	262	30	2.7	4.19	0.138	1765	534	38.3
57907	NO	4163	325.58	23.4	215.83	200.43	96.821	63.872	20.876	7.17	1473	2385	3514	9167	15	3.339	4.658	3.307	856	9.69	37.9	20.9	108.5	4964	4266	535	32.17	29.24	1.697	8530	4253	247.9
57911	NO	2024	293.12	13.5	79.01	62.97	28.464	19.349	9.901	4.85	284	310	0	300	2	1.453	2.162	1.955	385	6.47	60.2	3.8	30.5	878	1358	256	27.02	15.42	0.911	2094	2860	86.8
57916	YES	2413	257.91	19.3	57.2	65.03	21.236	17.007	20.309	5.16	583	1039	119	5306	175	1.262	1.808	2.764	346	3.9	171.1	4.6	126.5	823	1211	392	17.82	11.75	1.206	1976	5008	63.8
57917	NO	3397	428.61	47.8	98.91	152.59	48.381	59.275	34.003	15.47	60	125	0	667	262	1.741	1.359	1.486	551	0.79	36.9	1.2	38.9	561	1853	598	19.18	16.26	3.171	2790	3542	150.5
57926	NO	3909	470.44	43.2	141.39	168.83	42.418	65.688	49.936	22.51	960	1383	1606	4166	213	3.967	4.742	4.373	1193	11.88	279.4	13.8	271.4	1941	2572	768	37.35	26.7	2.873	4102	5527	170
57956	NO	1393	221.69	38.3	66.66	38.78	12.638	12.704	9.023	6.77	207	282	28	851	58	1.61	2.026	1.883	360	4.42	51.6	2.8	73.9	844	1005	235	15.5	12.84	1.169	2282	2419	96.8
57959	YES	2144	318.37	19.8	85.82	63.77	23.625	22.189	13.485	10.95	1959	2175	894	2137	37	2.125	3.593	1.727	628	7.93	22.4	15.2	69.1	2076	1903	346	20.95	14.88	1.466	3996	3537	113.1
57966	NO	2940	326.18	9.9	62.49	137.07	46.468	36.539	42.284	9.14	338	695	1	4290	1	0.781	1.436	1.726	351	2.02	33.4	1.2	502.7	474	1288	262	13.08	9.16	0.776	5844	2874	56.1
57977	NO	1851	190.03	32.3	68.9	94.22	16.928	48.077	23.299	13.19	11	31	67	188	51	1.387	1.537	1.589	318	0.54	64.8	0.3	31.3	289	1104	494	7.71	9.9	1.778	2471	3019	65.4
57981	YES	2627	323.56	13.6	105.96	102.46	33.366	40.898	15.108	5.56	594	607	3	154	15	2.048	3.22	1.955	392	7.22	21.8	5.8	45.2	994	2086	202	19.25	18.06	0.942	4396	2258	134.5
57986	NO	1985	197.49	22.8	92.83	94.21	26.127	37.01	22.247	19.64	861	1357	2029	4901	78	1.498	2.159	3.037	315	3.88	218.1	1.4	184.7	521	1257	307	14.18	15.24	1.843	3777	3420	122.8
57987	NO	1395	232.44	25.9	57.46	29.75	7.34	10.806	7.705	7.32	303	937	1924	6592	101	1.757	1.607	2.3	655	4.11	96.2	2.2	202.9	549	844	284	19.2	14.55	1.135	2143	2789	93.5
57989	NO	3067	303.13	16.3	100.16	119.41	40.967	37.69	31.489	6.95	762	858	262	970	85	1.512	3.666	2.196	364	4.24	101.3	4.8	162.8	1646	1983	386	15.3	11.59	1.714	5702	3506	91.6
57999	NO	1232	173.94	5.3	48.67	39.53	7.746	15.147	12.77	4.93	186	228	0	514	5	0.473	0.785	1.102	126	0.84	32	1.7	45.6	244	554	179	5.88	3.01	0.355	1895	794	82.6
58004	NO	1625	202.81	13.1	64.7	66.69	16.741	29.116	17.549	8.98	550	576	47	256	63	1.622	2.305	1.351	395	4.74	85.2	8.8	28.4	1349	1457	314	12.07	9.02	1.018	2327	2477	65.5
58024	NO	3137	345.52	24.1	137.77	147.23	40.243	60.495	34.98	15.26	1281	1323	34	442	82	2.357	2.89	3.61	469	15.66	65	5.2	106.6	1214	3270	373	27.43	8.44	1.053	8632	2940	198.3
58028	NO	1874	304.04	27.5	57.39	56.51	11.882	15.889	24.912	5.61	347	392	127	302	376	1.27	1.451	1.513	281	1.86	129.5	4	34.5	828	1320	425	10.91	9.66	1.794	1755	2829	62.3
58045	NO	1433	163.69	18.5	67.42	56.17	17.768	20.417	12.929	4.19	245	357	474	1127	19	1.09	1.496	0.969	351	3.35	11	4.4	43.1	710	1346	260	13.71	8.89	1.15	2902	2201	112.2
58048	NO	3997	487.49	16.3	109.14	158.31	52.635	64.265	27.107	14.83	204	231	5	309	4	2.254	3.982	1.47	521	6.1	24.2	2.6	48.5	1324	1970	443	21.06	16.95	1.462	5214	3775	133.7
58053	NO	2047	247.36	21.6	101.49	57.93	13.078	22.569	16.22	13.62	361	445	96	967	0	2.213	3.986	2.323	492	4.77	25.4	25.2	65.6	1226	1854	526	14.29	9.7	1.426	3072	4593	196
58058	NO	2212	318.56	30	64.41	81.65	38.758	21.399	13.775	12.08	815	844	34	274	166	2.228	3.173	2.66	647	8.07	96.4	5.2	26.9	1153	1665	409	28.96	18.79	1.309	2880	2465	67.2
58060	NO	3286	348.78	18.9	131.07	153.08	65.184	48.484	25.244	10.23	939	995	5	668	2	2.657	4.982	1.571	699	7.57	35	6.1	95.3	2537	2604	368	18.81	16.62	1.494	5826	4169	185
58069	NO	1301	195.65	17.1	58.74	34.72	15.476	9.227	5.967	5.12	235	387	0	1713	220	0.709	0.986	1.566	210	1.36	106.2	0.5	202.1	454	888	222	5.69	6.93	0.765	1689	2021	76.3
58072	NO	1745	163.93	23.3	103.68	72.24	16.529	28.087	21.722	9.32	317	569	334	2271	1227	1.055	2.858	2.021	342	4.36	164.9	2.4	94.6	1049	1693	341	9.23	10.05	1.776	3168	3698	83.6
58079	YES	1671	187.21	10.6	62.41	58.22	16.565	21.192	15.652	5.35	222	1913	109	20187	101	1.44	1.862	2.26	222	1.81	141.5	2.6	36.4	327	982	234	7.17	5.66	1.005	2843	3059	110.5
58083	NO	3630	327.53	9	140.61	199.63	52.045	87.907	45.966	12.39	294	327	12	365	35	2.397	2.464	1.876	436	12.29	15.1	15.1	114.7	528	2857	276	18.3	9.82	2.195	7304	3050	229.6
58094	NO	2095	362.24	23.6	36.05	61.74	9.405	25.431	18.489	7.41	291	660	52	4402	6	1.751	2.309	1.476	444	1.01	49.9	0	445.9	505	1578	228	14.57	5.24	0.953	3876	1682	53.9
58095	NO	2862	330.29	13.3	135.93	110.97	36.071	42.152	22.654	10.83	383	612	72	2659	182	2.186	2.914	2.835	553	7.87	264.5	8.2	225.5	1904	2028	358	18.08	19.47	1.415	4478	4566	151.8
58108	NO	1284	196.55	8.3	38.87	42.45	10.876	11.858	16.28	3.17	104	136	47	201	322	0.575	0.791	0.771	164	0.78	17.1	0.3	64.4	272	625	143	4.83	5.21	0.61	1422	1286	35.6
58112	NO	1412	193.21	27.3	37.71	60.01	24.191	25.596	6.517	4.12	37	329	1034	2974	24	0.972	1.411	1.43	357	0.11	57.4	0.1	76.5	754	738	333	9.12	4.79	1.635	2761	3372	40.1
58117	NO	1176	145.86	4.6	26	56.66	13.348	24.987	14.25	5.55	534	539	0	63	14	0.528	1.072	0.681	123	2.05	4.6	2.4	28.6	174	479	69	5.89	2.62	0.399	1453	607	55.7
58118	NO	3560	405.22	38.8	167.93	125.37	43.977	44.507	23.402	6.84	239	264	0	311	0	3.516	2.241	2.54	692	6.25	15.4	4.1	49.6	1915	2460	578	36.43	48.98	2.805	6856	4308	202.1
58119	NO	2639	344.38	10.2	111.12	90.53	40.385	27.144	14.105	10.48	1386	1410	0	240	3	2.177	4.289	2.47	446	11.75	17.7	25.3	106.7	2525	2468	472	13.37	16.6	1.534	3380	3901	139.3
58122	NO	1842	205.62	20.6	123.31	58.67	22.687	20.779	8.816	2.43	546	564	13	166	41	1.213	2.885	2.076	146	4.68	17.1	12	17	1205	2068	316	8.4	9.56	0.74	2570	2958	121.4
58127	NO	981	136.75	11	21.68	41.52	19.682	14.182	5.35	2.64	418	427	20	98	4	1.328	2.009	1.921	333	5.79	18.7	5.8	11.7	641	734	159	13.52	13.25	0.577	969	1400	15.3
58130	NO	3420	411.15	30	112.5	148.15	39.309	63.078	34.269	10.86	20	445	878	4439	510	3.367	2.136	3.221	299	3.31	165.3	4.1	169.6	782	1823	634	15.96	22.83	2.161	7753	4699	197.6
58151	NO	1579	109.27	11.8	60.16	103.12	34.045	42.259	14.928	9.18	248	1304	7	12669	7	0.763	1.219	1.145	347	3.05	35.2	3.6	1020.8	1015	1192	307	13.14	10.06	1.155	4005	2412	62.3
58152	YES	2386	252.27	19.6	91.38	115.59	39.388	43.431	22.577	12.72	841	2409	2590	17526	11	1.931	2.65	1.932	570	4.97	38.5	3.8	837.9	888	1806	364	23.29	13.48	2.004	7591	3987	101
58166	NO	1146	149.07	14.4	76.15	30.75	7.965	10.648	8.671	2.74	380	401	9	271	10	1.222	2.246	2.133	375	4.47	31.4	2.8	99.5	472	1046	233	14.95	8.34	1.036	3396	2109	57.2
58167	NO	1473	154.47	13.8	76.04	62.67	22.757	19.731	15.764	10.25	670	787	3	1406	7	1.063	2.063	2.951	229	6.75	52.4	6.4	86.7	837	1050	226	9.62	7.01	0.817	3218	2490	83.6
58171	NO	2681	377.47	17.1	102.62	88.96	32.848	26.064	23.355	6.8	599	1149	2858	5112	89	1.59	2.432	2.217	323	7.8	18.2	23.6	142.2	1484	1941	529	14.12	9.35	1.958	4224	4491	172.4
58173	NO	2529	475.04	38.7	76.62	43.92	16.473	13.947	8.419	6.18	456	1082	2202	6401	58	1.876	2.33	2.44	608	4.62	198.6	6.8	238	1269	1603	589	21.68	9.84	1.847	2691	3455	85
58176	NO	1364	150.51	13.1	55.92	38.41	12.324	14.953	6.763	3.14	326	397	35	755	188	1.353	2.179	2.3	344	7.14	16.8	5.3	31	907	983	243	17.28	8.62	0.76	2758	2212	50.9
58183	NO	2576	255.63	11.1	189.4	60.13	20.613	22.549	8.973	3.13	63	97	32	389	3	1.734	3.89	10.711	475	13.5	10.8	0.9	56.3	681	2245	313	19.17	22.75	0.912	5623	3236	248.6
58194	NO	3276	251.01	14.1	94.44	114.08	33.051	45.33	26.144	9.27	121	152	61	314	48	1.098	1.759	2.866	403	6.9	21.3	1.8	44.1	821	1523	416	12.18	16.26	0.943	2844	2819	101.1
58195	NO	2840	306.4	15.7	139.27	117.32	42.856	30.678	30.535	9.32	634	675	8	449	5	1.803	2.849	2.041	438	5.4	30.8	7.7	126.9	1573	2069	298	20.28	14.03	1.032	4629	2756	210.2
58205	YES	1121	152.75	7.1	28.43	46.91	17.301	16.701	8.349	4.84	404	423	0	223	5	1.005	1.762	1.25	207	2.16	37.4	2.6	15.6	286	777	174	8.48	3.12	0.574	1643	1000	46.5
58207	NO	1197	153.7	5.3	26.36	53.81	15.933	20.801	13.682	6.43	293	304	0	145	4	0.952	1.6	1.227	179	3.23	5.5	1.6	38.4	446	571	117	5.68	3.32	0.444	1321	1472	40.1
58214	NO	3577	309.75	17	115.33	179.1	74.984	68.61	20.63	6.9	877	916	209	314	46	1.735	3.709	3.123	381	4.86	38.2	9.6	87	798	1891	391	15.87	15.4	1.509	4357	4758	154.6
58218	NO	2075	231.13	3	56.17	37.82	19.131	11.627	3.836	1.61	272	283	5	131	3	0.847	2.259	1.682	266	1.82	4.1	2.9	11.5	441	890	247	5.33	3.7	0.415	1499	2059	72.5
58219	NO	1944	246.41	29.1	74.69	75.29	19.328	25.512	24.843	9.39	408	512	156	1131	83	1.338	2.402	1.406	475	4.34	61.1	6.8	78.5	1083	1631	380	14.76	10.5	1.428	4309	3330	114.6
58220	NO	1922	283.37	24.4	56.01	65.08	21.096	20.241	16.721	6.57	169	550	1551	3776	29	2.099	2.083	0.776	548	1.33	38.6	2.2	93.7	809	794	218	17.6	7.5	1.086	2292	1606	126.3
58221	NO	1076	160.49	11.3	48.72	29.58	12.062	9.693	4.395	1.57	56	128	22	764	166	0.403	0.53	1.53	106	0.47	89.9	0.6	37.3	220	569	140	3.32	2.83	0.601	2057	1518	62
58225	NO	2040	159.15	19.4	68.49	79.93	19.662	33.41	21.747	13.35	231	319	134	947	98	0.807	1.269	1.918	394	1.58	131.4	2.7	55.4	635	1323	435	11.33	8.71	1.395	2139	3090	90.6
58230	YES	1767	237.89	11.1	61.19	64.64	15.007	24.921	19.629	7.63	384	420	27	377	100	1.131	1.244	1.282	311	3.01	197.1	2.5	79.7	432	999	232	11.6	17.45	1.871	4012	2482	89.3
58234	NO	2339	201.96	30.1	100.52	108.97	25.935	49.012	26.655	27.98	292	549	762	2676	92	1.102	2.756	1.512	328	2.98	74.2	3.6	93.2	1634	1712	545	12.17	13.53	2.173	3588	3196	85.4
58240	NO	1703	153.02	11.9	112.82	65.77	22.271	25.99	11.348	7.02	410	469	0	731	15	1.331	2.412	1.803	285	9.72	24.6	11.5	35.7	1014	1470	294	15.06	16.56	1.083	4137	2890	188.2
58243	NO	1377	160.53	19.9	68.52	40.75	12.498	14.946	10.131	5.11	104	1088	4023	9790	17	2.448	1.332	2.381	301	2.3	56.9	1.4	117.5	448	950	236	9.61	9.48	1.289	3685	2889	91.9
58269	NO	1305	154.74	12.2	59.19	38.11	14.228	15.498	4.416	4.97	201	3335	0	37602	0	1.162	1.411	1.734	155	3.42	80.5	4.9	98.8	647	925	201	7.82	8.5	0.857	3778	2403	84
58272	NO	2303	174.83	5.2	86.3	140.94	43.285	58.19	24.627	6.31	72	74	0	16	4	1.408	1.019	1.678	90	4.59	16	2.7	14.9	249	978	183	8.85	11.07	0.941	3740	2134	22.7
58283	NO	1068	151.98	15.3	32.17	39.65	10.288	13.309	11.231	7.07	1	87	84	973	7	0.871	1.124	1.161	247	0.46	26.2	0.1	71	211	466	213	7.1	4.42	0.87	1372	1814	62.4
58286	NO	1383	192.99	22.7	71.17	44.12	9.315	13.731	15.632	26.79	452	1392	118	11217	6	3.018	4.29	4.769	821	13.28	100.1	11.9	91	2403	1158	340	33.27	29.43	1.105	2368	3563	88.4
58290	NO	2688	426.99	33.5	82.8	81.1	25.991	24.867	21.339	7.37	0	1301	3780	13309	1008	3.634	2.627	1.98	713	1.83	267.1	1	177.9	1046	1447	423	21.22	9.64	2.068	5125	4369	156.4
58291	NO	2169	227.2	10.1	85.04	105.4	34.716	37.18	23.269	6.85	356	431	10	877	14	1.909	2.148	1.184	262	2.56	24	5.3	104.2	768	1377	223	13.36	9.34	0.954	3183	2074	125.3
58292	NO	4853	692.46	64.3	138.74	145.88	42.769	67.325	25.17	14.02	250	495	217	2443	810	4.636	3.21	4.466	1423	5.77	388.1	2.4	113.8	1839	2701	625	40.16	21.22	2.678	7537	6271	227.4
58300	NO	1722	191.23	14.1	72.18	76.11	27.995	27.973	12.424	4.9	212	229	6	178	12	1.179	0.982	2.661	133	2.76	41.1	1.5	33.4	292	946	252	9.81	7.58	1.465	3064	3197	61.6
58306	NO	2032	181.2	15	63.85	89.16	24.093	40.152	19.927	12.33	451	718	11	3168	46	0.689	2.234	1.538	362	2.11	32.3	5	282.6	504	1158	369	10.08	7.85	1.06	1904	2095	92.8
58316	NO	1546	230.95	26.8	74.37	38.92	13.486	12.552	8.021	7.66	268	550	890	2818	229	1.596	1.267	2.071	578	1.87	191.3	2.3	77.5	1082	1256	301	12.13	8.18	1.263	3590	3520	75
58319	NO	2924	425.06	16	68.94	77.85	17.015	27.709	26.922	5.58	693	1091	1611	3998	5	1.413	2.677	2.123	354	4.02	66.3	9.1	90.1	1149	1626	313	12.74	8.79	0.748	3900	2808	91.7
58322	NO	2252	195.08	10.2	91.28	123.95	29.479	43.606	42.24	8.39	403	452	29	565	42	0.876	1.765	1.875	219	2.5	46.3	3.8	80.7	937	1616	281	10.73	7.62	1.135	4832	2487	121.2
58323	NO	3097	336.48	25	121.11	123.9	37.354	45.845	24.105	12.08	254	402	100	1692	55	1.89	1.987	2.265	566	6.46	35.5	2.8	89.9	989	1799	376	21.05	20.69	1.563	5097	3757	187.5
58327	NO	2719	243.55	9.2	116.82	117.22	34.579	46.2	25.489	19.14	1492	1525	0	401	30	1.659	5.615	3.325	546	12.56	31.8	14.2	98.8	1348	2420	543	16.97	12.38	1.485	4636	5584	167.1
58328	NO	2783	353	12.2	124.92	97.74	31.178	38.89	18.555	5.48	642	657	31	134	109	2.044	2.064	2.864	301	2.46	205.9	6.3	39.4	1355	1875	304	19.2	10.05	0.881	4963	2454	163.8
58334	NO	2246	292.15	13.8	60.35	95.29	34.375	33.023	18.88	11.17	234	324	21	1063	3	1.614	2.361	1.464	352	2.8	23.3	1.5	67.8	699	1031	243	12.05	9.2	0.981	2855	3109	102
58343	NO	1734	203.13	28.9	80.73	40.27	10.284	16.199	8.569	4.34	86	317	36	2769	4	1.099	1.375	1.669	242	5.06	36.8	1.7	298.5	535	1029	193	13.89	17.09	1.111	2095	2237	107.5
58352	NO	945	89.2	5.6	53.23	42.41	17.697	14.279	6.953	11.19	139	142	0	41	6	0.77	1.418	3.257	103	1.55	56.1	0.5	10.6	444	822	140	5.04	5.36	0.483	2322	1370	69.2
58359	NO	1925	287.2	4.8	53.36	63.49	16.438	27.9	13.163	3.53	360	360	3	3	3	0.833	1.135	1.681	96	0.82	374.7	0	27.4	125	585	147	11.56	5.73	0.608	1777	2630	59.9
58372	NO	1600	216.88	17.7	73.65	52.32	16.589	16.62	12.78	4.5	155	203	15	528	78	0.606	1.178	1.905	190	4.22	90	0.6	59.9	598	1118	308	9.8	12.83	1.197	2540	3298	74.2
58380	NO	1974	194.97	19	103.3	87.43	34.08	29.348	16.457	4.94	440	485	4	502	116	1.239	1.826	1.247	325	5.36	3.8	5.5	38.8	1333	1832	253	14.25	13.67	0.791	4179	1847	147.3
58390	YES	2684	378.89	24.6	96.37	66.62	15.189	24.883	19.223	5.16	370	381	17	92	51	1.852	2.447	2.305	549	7.85	136.2	4.4	97.7	920	1399	342	27.08	24.71	1.201	4379	3041	102.5
58394	NO	782	136.11	9.1	40.36	7.82	1.716	3.159	1.719	2.32	21	121	315	1020	37	0.921	0.747	0.777	209	1.52	26.1	1.7	24.6	250	585	133	7.66	5.24	0.91	2388	1617	54.4
58396	NO	3738	424.53	24.5	227.74	128.55	40.584	57.314	18.479	11.51	649	689	7	475	41	4.137	4.497	4.802	891	15.92	27.5	7.7	36.5	1132	2930	550	40.15	37.23	2.087	6042	4931	343.3
58397	NO	2840	349.4	15.1	81.8	127.15	40.919	58.336	18.921	4.47	205	238	63	316	100	2.587	2.257	2.462	319	3.74	166.6	7.1	33.9	1450	1570	333	9.74	14.73	1.589	4766	4287	160
58398	NO	1884	221.17	21.3	67.35	52.26	13.037	19.709	13.491	7.25	272	426	411	1637	39	1.779	1.974	2.739	496	3.2	104.5	2	99.1	367	1006	304	15.43	6.27	0.937	3131	2670	114.7
58405	NO	2028	267.9	24.5	76.71	73.15	19.395	26.216	20.37	4.57	12	35	48	233	50	1.687	2.048	1.473	465	0.64	18.5	0.7	63.8	479	1081	350	16.2	7.88	1.524	4002	2521	114.8
58407	NO	3904	501.64	29.6	100.86	173.07	52.701	65.142	40.462	14.32	493	560	24	748	48	2.766	1.639	0.9	757	2.7	22.5	0.3	85.4	1322	1990	421	22.66	14.96	1.781	5529	2096	141.7
58411	NO	1496	159.26	12.6	47.99	68.4	21.249	26.943	16.086	8.22	239	910	2107	6895	201	0.98	0.914	1.043	298	1.36	125.4	0.6	41.8	545	749	275	6.72	5.95	1.109	1524	2316	41.5
58413	NO	1250	214.86	13.8	42.34	27.1	5.821	9.612	8.717	3.06	274	331	157	619	4	1.419	1.589	1.377	297	2.52	177.2	3.5	17.4	833	838	310	12	7.96	1.164	1479	2834	70.3
58414	NO	2431	270.55	29.2	107.53	103.79	36.084	37.256	22.04	5.93	369	379	1	106	2	1.368	1.883	1.459	508	3.41	20.5	5.2	47.1	1169	1686	384	16.21	13.66	1.39	3987	3305	128.8
58415	NO	3718	510.51	13.7	84.69	154.61	64.292	54.188	21.303	9.32	807	848	7	457	3	1.07	2.426	1.199	205	5.01	7.1	1.9	37.4	926	1583	305	11.67	15.45	1.416	4966	3144	83.2
58418	NO	1844	174.92	7.4	88.47	74.63	31.153	28.704	8.796	2.86	281	302	0	234	3	2.192	1.713	1.709	246	2.7	11.7	2.3	71	541	1163	186	10.17	10.85	0.69	2838	1978	138.3
58424	NO	2217	233.86	11.5	76.27	79.94	17.274	22.138	34.682	8.56	144	195	63	586	21	1.524	1.203	1.9	262	1.9	27.9	2.3	121.6	1003	1101	236	12.53	5.86	1.663	3240	2388	82.1
58429	NO	3383	267.74	11.7	142.33	142.14	50.859	53.471	25.182	8.16	775	961	403	2007	31	1.374	3.347	2.957	298	9.75	63.2	11.5	99.7	1531	2338	312	15.04	21.38	1.292	4699	4234	163.2
58430	NO	2464	341.42	23.5	78.81	88.01	29.35	29.036	20.948	12.34	232	580	935	3657	56	2.937	2.277	2.42	915	15.74	30.7	2.6	150.2	722	1058	274	29.84	11.6	1.46	6070	2673	161.1
58433	NO	1052	182.76	25.6	33.99	24.34	3.903	8.747	10.192	3.35	31	36	2	72	4	1.07	0.56	1.314	359	0.29	45.9	0.6	32.9	183	749	249	10.5	5.35	1.27	1759	1988	68.9
58449	NO	3243	503.67	50.3	116.05	90	32.618	36.289	14.014	8.97	385	1100	2001	7450	194	3.16	2.753	3.11	674	6.46	387.9	10.1	83.3	1512	2042	506	23.19	18.03	2.997	7065	5361	150.1
58453	NO	1659	230.49	13.6	78.95	50.44	14.218	18.306	14.38	4.75	194	446	958	2545	5	0.771	1.073	1.635	176	4.41	45.3	9.9	54.8	513	1228	250	7.1	5.14	1.057	2226	2739	129.4
58458	NO	1797	213.64	15.7	64.87	76.05	27.586	27.282	16.954	6.06	395	405	1	135	2	1.588	1.302	0.883	403	2.12	2.2	1.5	53.3	543	930	207	12.64	8.87	0.865	2296	1742	92
58459	NO	2004	272.71	10.9	77.31	46.74	19.473	15.781	7.038	2.75	693	742	157	478	103	1.845	3.137	2.163	564	19.2	248.8	14.5	15.4	2421	2072	361	16.18	14.22	1.251	3471	3580	115.1
58461	NO	1508	225.17	21.9	51.19	48.44	17.164	18.268	7.798	9.63	234	271	3	450	9	1.107	1.21	0.657	266	1.79	24.3	3	12.3	565	784	212	18.76	17.37	1.231	2965	1686	94.9
58465	NO	2575	219.22	23	111.68	128.79	42.163	41.788	35.054	8.99	800	892	121	983	152	2.296	2.923	3.386	431	12.7	32.4	16.9	97.6	1157	1852	409	20.86	12.52	1.353	5507	2942	227.2
58471	NO	1289	139.05	9	55.47	38.19	9.986	12.115	12.367	7.94	554	597	67	427	85	1.513	1.585	1.46	335	3.09	53.2	4.6	179.9	937	1110	293	12.17	10.16	1.355	3084	2119	67.5
58474	NO	1630	162.45	12.1	110.93	59.46	20.252	23.805	9.201	6.7	243	328	15	913	173	1.045	1.833	2.201	266	5.27	89.4	12.8	94.1	693	1363	253	11.09	15.59	0.674	1892	2421	159
58488	NO	1322	221.62	15.6	34.85	36.48	16.317	12.528	4.159	1.38	289	320	48	222	226	1.697	2.064	1.162	399	3.11	111.9	5.6	11.4	775	873	187	19.08	4.31	0.539	1370	2133	57.2
58491	YES	2346	208.55	23.1	135.1	103.51	34.165	40.726	20.069	11.44	467	504	33	417	4	1.508	2.492	2.655	338	7.79	58.1	12.3	76.8	1099	1990	481	14	18.09	2.59	3488	3938	183.1
58492	NO	3188	428.16	35.5	178.93	85.38	36.581	29.864	10.478	5.34	678	1014	1077	3495	5	2.364	3.041	1.946	698	8.05	42.5	7.6	83.5	2217	2924	508	27.35	27.65	2.177	5833	4180	231.8
58493	NO	1280	96.19	7.5	42.27	81.51	25.115	35.136	16.593	4.04	62	85	14	245	25	1.063	1.178	0.651	169	3.01	8.6	1.3	25.7	592	621	134	10.05	7.84	0.642	3478	1059	59.7
58501	NO	3190	477.81	45.1	93.2	118.08	36.958	42.567	28.108	11.9	342	366	22	230	47	2.708	2.768	2.705	634	7.05	36.6	5.6	46.7	1206	1482	405	23.77	16.51	1.956	3424	2450	150.4
58515	NO	2118	307.42	20	114.33	48.73	19.193	16.168	6.779	4.19	335	475	53	1595	0	2.021	2.679	2.206	426	7.66	154.5	7.5	51	951	1435	321	18.18	21.98	1.312	2886	3517	159.9
58520	NO	2182	257.63	16	85.94	70.73	15.644	25.282	20.7	4.3	64	647	2211	5899	1	2.156	1.605	1.503	490	2.02	67.4	1.5	105.3	1040	966	213	17.96	9.14	1.083	5101	1579	147.2
58521	YES	1337	123.42	7.5	54.73	69.48	23.892	25.381	12.901	6.78	286	1741	6485	14194	50	1.292	1.332	1.415	247	4.57	75.8	3.2	67.7	614	785	155	18.45	8.77	0.614	2165	1823	82.5
58522	NO	1771	142.88	6.6	65.13	93.34	25.941	33.251	24.732	5.28	279	768	1935	4867	32	0.84	1.268	1.297	213	2.65	28.3	4	97.6	413	1029	141	8.86	6.64	0.591	3299	1517	108.4
58525	NO	2077	233.63	17.6	94.57	86.46	32.029	36.879	10.476	3.16	41	131	5	616	935	2.374	1.45	3.154	421	4.6	232.3	3.8	24.9	844	1125	302	17.82	14.08	1.392	3304	2365	140.5
58545	NO	2343	280.93	13.8	90.29	99.52	36.26	32.573	19.457	9.68	329	705	438	4197	191	1.084	1.176	2.367	322	5.55	101.1	4.1	222.8	403	1133	252	13.6	13.24	1.47	3670	3397	143.1
58560	NO	1296	158.89	10.6	39.29	58.24	14.235	21.569	18.499	4.7	127	181	130	507	150	0.908	1.242	1.234	262	3.03	38.7	3.7	77.6	565	762	209	5.67	3.37	0.616	2828	1988	61.4
58561	NO	1211	137.74	11	49.49	52.16	14.183	21.538	11.305	3.99	20	21	6	6	6	0.669	0.485	0.941	158	1.49	0.9	0.4	22.4	253	849	182	9.69	6.19	0.75	2800	1326	53.1
58562	NO	4691	556.27	50.3	139.75	210.52	49.761	72.372	72.189	30.78	979	1260	48	2935	873	4.843	5.862	5.403	1705	32.17	223.4	6	143.1	1750	2800	715	53.43	35.16	3.867	6285	4482	250
58567	NO	2849	294.4	11.3	82.55	84.57	30.805	34.563	12.852	6.2	307	538	564	2501	0	1.384	1.973	1.989	423	3.38	19.3	5.1	68.3	892	1568	325	15.31	9.88	1.205	4351	2486	102.7
58573	NO	1438	118.63	7.4	57.44	82.07	25.428	30.927	18.934	5.61	193	276	45	985	7	0.945	1.015	0.971	187	2.43	61.3	2.6	70.4	669	730	212	8.08	5.99	0.89	2235	1406	59.7
58574	NO	563	67.77	5	27.83	19.98	5.553	5.48	2.75	1.2	106	110	12	22	46	0.637	0.729	0.425	112	0.85	55.4	1.5	5.9	391	388	134	4.63	2.88	0.512	1261	821	55.4
58588	NO	2861	378.64	7.1	113.68	99.27	38.668	35.261	18.646	6.49	661	703	0	513	18	3.919	4.632	3.31	1614	5.49	10.8	10.7	28.3	1364	1928	282	29.9	25.54	1.075	5961	2684	172.5
58590	NO	1450	160.27	15.5	73.23	58.43	22.437	22.599	5.493	2.76	137	572	1914	4277	1	1.318	1.554	2.415	208	6.72	41.1	2.2	28.8	341	930	222	21.69	15.1	1.011	2758	2650	76
58591	NO	2149	276.2	21.7	51.21	99.51	27.986	31.947	32.877	10.6	201	877	1395	7384	46	1.386	1.602	1.494	367	2.67	215.2	0.7	104.1	606	943	236	11.12	6.95	1.387	3372	3187	66.2
58592	NO	2602	371.52	34.9	108.77	79.01	14.317	29.475	29.875	18.29	376	398	86	87	292	1.804	1.056	2.057	818	0.37	364.7	10.1	94	2807	1469	531	26.73	20.54	2.468	2841	4924	103.1
58593	NO	1346	181.17	11.8	46.04	50.36	19.314	18.457	7.259	3.95	557	596	39	404	29	1.224	1.58	1.375	280	2.71	49.8	1.4	27.2	1308	1023	198	11.92	6.59	0.703	1920	1652	63.1
58601	NO	3090	406.75	13.9	90.52	122.33	51.455	38.471	21.596	8.13	736	760	28	238	103	1.544	2.488	2.498	384	7.29	157.2	12	36.6	2167	1924	344	13.59	14.3	1.279	4958	4636	91.2
58603	NO	1212	168.92	21.6	62.28	33.19	7.92	11.898	10.002	4.27	214	515	1195	3033	11	1.109	1.149	1.111	367	1.11	32.5	2.6	67.1	429	1120	278	10.39	7.32	1.092	1744	1563	110
58610	NO	3234	498.19	9.4	86.73	105.02	24.841	40.6	31.437	7.4	341	486	556	1488	10	1.031	1.618	1.838	267	2.57	55.5	2.7	131.6	315	1231	217	10.68	9.77	0.971	4681	2799	116.4
58611	NO	1331	127.58	8	57.66	41.89	16.255	15.465	5.544	3.36	300	881	2036	5932	0	0.976	1.649	1.589	252	4.38	106.9	5.9	38.5	747	976	210	6.94	7.92	1.226	2583	2332	72.9
58613	NO	4671	388.13	13.8	219.9	205.88	76.169	66.54	44.033	10.24	752	798	6	555	16	3.658	4.78	3.658	730	10.46	21.5	19.1	79.9	4648	4731	536	26.31	25.29	1.667	12310	5884	271.7
58614	NO	612	70.7	3.2	33.89	20.25	5.463	6.939	5.713	0.97	19	22	1	37	0	0.75	0.502	0.552	129	0.69	0.4	0.5	3.9	397	326	79	5.3	2.68	0.3	1117	566	42
58615	NO	2355	195.48	13	77.38	142.01	42.242	39.666	47.356	12.21	255	303	40	567	1	2.09	2.687	1.166	668	2.52	21.7	2.2	222.1	797	1246	283	15.42	12.33	1.29	4677	2862	124.6
58619	NO	2129	275.11	18.5	140.14	56.56	16.282	18.397	9.514	2.87	210	561	4	3816	967	1.62	2.214	2.806	294	11.13	107.3	4.7	13.1	962	1906	450	18.8	21.34	1.737	2325	3851	168.1
58622	NO	1202	78.52	6.7	80.92	62.65	32.156	20.208	5.251	2.73	358	631	700	2914	33	0.875	1.392	1.194	214	5.23	92.2	3.3	41.7	1264	1263	215	9.02	12.9	1.38	3079	1860	101.2
58627	YES	2472	320.58	12.7	47.8	115.49	44.309	35.414	27.674	8.92	435	571	89	1558	30	1.706	2.129	0.798	424	3.14	62.5	6.3	95.6	947	1017	205	10.17	6.51	1.15	2556	1937	110.2
58638	NO	645	64.68	15.6	42.2	24.37	9.136	10.615	2.925	2.64	0	0	0	0	0	0.737	0.845	0.605	215	0.41	0	0.8	9.6	334	478	215	9.65	4.94	0.838	1013	2030	31.7
58640	NO	2537	333.99	14.6	100.18	93.56	32.293	31.619	20.261	5.69	185	482	518	3271	110	2.005	2.211	2.724	979	6.43	152	7.3	212.1	1722	1511	277	21.89	23.73	1.095	3477	2951	125.2
58642	NO	6892	669.65	34.6	301.94	336.99	130.18	124.762	57.645	18.1	1115	1501	1123	4035	107	3.579	4.39	6.167	1302	8.3	199.8	6.2	234.5	2749	4601	659	39.75	33.16	2.703	14211	7185	359.2
58647	NO	5687	276.5	11.3	264.73	154.33	52.152	55.365	28.652	7.26	93	133	26	388	224	2.384	5.376	4.966	487	23.24	106.3	5.6	37.4	1064	2971	536	32.76	47.95	3.178	6523	4471	230.9
58651	NO	977	98.8	2.2	47.36	42.55	14.425	16.261	8.356	3.14	478	482	3	27	11	0.944	1.734	1.155	296	5.42	6.1	7.5	16.4	596	793	111	10.87	9.23	0.399	1615	1035	73.2
58653	NO	2775	307.37	8.1	75.79	117.65	53.996	38.57	17.287	6.13	679	690	0	132	5	1.351	2.169	1.564	274	3.92	11.1	4.3	31.2	1385	1573	220	8.64	9.15	0.604	2534	2349	95
58656	NO	3616	427.23	30.5	130.88	154.98	49.63	62.319	32.964	12.19	933	991	25	676	36	3.564	3.445	3.503	801	17.08	14.9	3	77.4	1241	1969	347	33.35	17.37	1.691	6476	3745	206.5
58670	NO	3189	477.65	26.2	94.43	104.8	32.506	39.098	24.926	10.11	735	811	0	908	1	3.32	2.904	2.394	1000	7.61	32.2	4.9	88	1280	1915	321	24.93	13.05	1.466	5379	2537	167.2
58672	NO	1773	220.5	12	62.31	74.73	21.468	27.998	16.604	4.15	78	110	215	192	165	0.74	1.02	1.016	190	1.39	84.3	1.7	78.7	349	859	201	12.13	7.89	1.237	2790	1890	94.5
58677	NO	1951	266.21	6	61.86	71.91	25.223	27.967	13.451	7.35	675	679	0	34	0	2.642	2.537	2.375	545	6.64	24.9	6.6	9.7	798	987	133	18.5	9.37	0.636	3854	1481	95.1
58681	NO	1217	94.92	15.3	75.06	60.18	17.232	19.898	17.61	5.8	302	700	111	4706	29	0.789	1.785	1.6	363	3.64	52	5.6	290.1	597	1061	251	9.31	11.86	1.074	1976	2586	87.4
58683	NO	3858	453.74	16.9	70.73	80.91	21.183	44.16	10.056	7.86	39	66	12	343	5	2.695	2.654	1.668	771	1.76	7.9	3.1	34.6	479	1467	431	27.16	10.24	1.422	6810	3883	130.1
58690	NO	1713	180.26	19.3	66.18	76.96	22.174	33.146	15.406	10.37	123	482	15	4224	158	1.282	1.238	1.352	433	3.42	70.8	1	264.5	767	1054	299	13.83	12.14	1.548	2700	2265	73.3
58699	NO	1825	291.35	12.3	53.84	52.13	13.277	20.618	14.317	9.33	267	863	1709	6307	11	0.967	0.99	1.81	351	2.57	175.1	1.6	125.5	747	1019	280	8.63	5.75	1.122	3236	2803	96.1
58708	NO	2028	273.87	12.9	64.77	76.78	25.448	30.328	10.001	3.19	115	171	52	581	104	1.369	1.717	1.005	383	3.56	43.9	2.1	25.4	475	1054	274	12.68	10.91	1.07	1911	2572	95.3
58709	YES	2358	383.14	27.5	86.25	61.29	12.82	22.792	19.191	7.01	326	360	65	361	85	2.056	3.08	3.687	535	3.54	260.2	5.9	70.9	1314	1528	450	30.22	9.05	1.447	3540	4887	119
58714	NO	2721	290.82	27.4	91.94	104.85	34.408	45.221	17.253	6.41	208	271	30	673	171	2.795	2.901	1.609	492	3.58	84.9	6.8	27.1	981	1535	435	20.23	15.54	1.87	5486	3895	158.3
58719	NO	2677	225.04	12	118.91	144.63	60.819	53.223	14.805	8.69	597	785	154	2047	230	1.974	2.605	2.628	452	10.31	202	7.5	77.4	1648	1938	297	17.62	20.17	1.295	5637	3758	151.5
58725	NO	3458	368.6	13.2	148.96	156.18	67.22	52.199	14.538	9.42	851	876	1	251	4	2.208	3.724	2.843	315	12.87	99.8	10.6	54.3	1697	2375	338	19.97	27.36	1.415	5270	4483	177.2
58728	NO	2659	418.8	48.2	93.76	77.8	16.616	31.008	24.127	8.01	193	674	1062	4437	1649	2.262	2.639	2.562	657	3.78	334.8	3	280.6	1278	1752	617	22.2	12.9	2.845	6040	5025	145.3
58735	NO	1395	181.05	14.4	67.13	46.22	15.599	16.029	9.896	4.71	282	449	540	1668	152	1.227	1.439	1.25	224	1.93	69.7	4.2	43.9	577	1062	248	7.78	6.88	0.862	2198	2100	96.8
58741	NO	1686	267.09	23.4	69.23	42.62	9.755	15.845	13.77	7.07	203	307	0	1118	305	1.118	1.432	1.957	169	3.3	56.2	4.1	48.9	646	1397	297	10.72	11.61	1.437	2495	3008	89.7
58749	NO	2103	208.03	15.5	97.49	99.17	20.111	37.02	32.513	7.82	564	1045	20	5722	75	1.119	1.514	3.169	434	2.03	154.3	3.1	168.2	441	1647	281	13.92	8.3	1.056	4540	3180	99.7
58750	NO	3487	435.96	6.7	212.51	97.52	24.623	36.173	26.026	7.18	364	389	46	267	11	2.115	2.354	5.197	437	6.89	13.5	8.7	45	959	2547	367	17.71	11.81	1.246	7130	3454	310.4
58751	NO	1729	247.53	13.4	62.56	55.39	15.158	24.045	11.383	4.04	337	356	8	199	33	1.248	1.127	0.876	353	1.57	19.3	3.3	34.5	355	1102	128	13	5.84	0.651	3409	1352	123.7
58764	NO	1488	164.4	13.3	80.92	61.3	21.429	17.384	16.722	6.25	434	457	44	227	177	0.898	1.902	1.629	292	6.28	93.3	11.1	17.7	1165	1640	261	5.42	7.3	0.727	3438	3015	112.5
58765	NO	2106	209.68	9.7	88.86	101.63	29.028	41.939	22.993	5.67	353	505	598	1519	4	1.544	2.342	1.656	278	3.26	19.3	5.6	56.3	932	1623	223	9.81	7.35	0.925	4298	2592	110.2
58772	NO	1032	144.28	10	36.35	25.9	8.952	9.668	4.979	3.13	510	624	454	1142	1	1.265	1.847	1.834	328	5.31	29.6	5.1	35.6	647	743	187	13.2	5.65	0.553	1550	1640	46.9
58794	NO	3200	348.19	14	63.51	103.99	33.178	33.923	29.46	8.64	172	205	40	299	134	1.237	2.033	1.906	546	2.73	172	4.4	34	1904	1588	389	9.68	7.57	1.238	2966	2624	88.2
58802	NO	2156	204.54	26.9	107.93	101.75	24.194	35.483	31.581	10.41	425	714	1013	2958	13	2.251	11.974	38.543	475	41.75	39.9	1.2	141.4	1022	1524	447	21.76	15.36	1.821	5162	3306	119.4
58806	NO	574	99.77	5	10.82	16.28	3.414	7.02	4.79	1.88	8	12	16	34	30	0.578	0.597	0.329	188	0.05	47.1	0	13.1	478	147	165	3.82	1.18	0.619	532	1014	26.7
58809	NO	2044	239.4	14.3	42.78	91.77	33.648	32.526	18.433	8.82	396	624	102	2652	77	0.717	1.271	1.161	229	1.89	147	2.4	228.9	783	946	231	11.07	6.03	1.126	2241	2086	59.4
58816	NO	832	145.79	18.7	27.24	19.17	5.274	6.649	5.303	3.35	398	749	13	4156	33	0.974	1.249	1.085	337	0.78	60.4	0.6	340	831	698	163	10.68	3.77	0.606	2035	1592	35.3
58830	NO	3080	385.81	18.1	117.67	117.72	36.779	44.069	26.779	13.81	841	956	103	1304	5	3.027	3.791	2.157	640	5.58	57	12.2	92.1	2008	1945	318	23.55	14.65	1.332	5321	2983	248.3
58838	NO	2018	272.74	17.1	88.55	64.91	17.764	23.862	16.299	5.22	654	693	35	408	121	2.225	3.143	2.907	674	7.85	96.8	8.6	60.8	1154	1495	316	18.52	18.08	1.246	4066	3236	123.8
58842	NO	2778	444.33	30.1	97.22	63.71	22.062	25.842	10.048	4.4	1566	1650	215	888	7	3.302	3.894	3.339	768	5.24	5.4	3.6	29.4	1359	2126	448	38.56	18.43	1.471	5309	3363	144.9
58845	NO	1975	154.75	14.4	84.74	96.99	42.671	31.216	13.673	6.55	561	606	16	534	8	2.008	3.405	1.327	469	3.7	10.5	4.8	65.1	1292	1661	299	13.08	12.14	0.895	4875	3826	120.1
58852	NO	3171	289.53	23.7	154.85	163.31	34.385	61.148	53.405	19.59	300	506	725	2122	2	1.611	1.586	3.661	481	10.14	28.5	0.5	81.8	480	1827	516	19.01	17.21	3.134	4120	3482	210.8
58854	NO	1376	225.24	11.1	29.94	41.3	10.454	16.408	11.234	2.65	35	43	0	88	0	0.542	0.743	0.373	132	0.39	3.6	0.3	18.9	156	733	202	5.87	5.07	0.972	1711	1134	39.2
58857	NO	2812	333.97	20.2	114.09	96.81	34.881	34.108	15.743	6.88	377	467	28	1071	9	2.019	2.431	1.784	374	6.91	53.9	1.6	72.1	1424	1949	300	17.55	14.64	2.038	5638	2724	216.9
58865	NO	1149	155.9	14.9	24.91	51.98	10.938	12.618	21.761	7.49	78	264	427	1987	7	0.625	0.614	0.955	169	0.89	79.3	0.3	82.9	452	598	196	5.37	4.49	0.919	1673	1904	39.9
58867	NO	1435	258.77	11.9	25.43	36.94	18.639	12.028	3.128	1.7	40	94	67	543	114	0.758	1.173	0.737	69	0.69	24.8	1.6	89.1	227	475	130	6.59	4.45	0.963	1183	1926	35.8
58868	NO	1544	193.12	12.5	66.89	58.02	14.829	28.909	10.102	16.62	489	513	10	284	1	1.157	1.787	2.744	608	6.84	85.5	5	37	790	1378	243	20.91	11.77	0.869	3166	2529	103.7
58869	NO	2501	383.16	19.1	90.78	72.47	29.084	26.968	9.087	5.81	618	690	89	650	303	3.03	2.803	3.332	705	6.68	374.4	11.5	53.8	2153	1903	351	19.79	14.94	1.351	3864	4089	122.2
58876	NO	1770	269.37	9	66.96	48.36	11.836	19.828	13.556	5.52	264	275	2	108	24	1.766	1.526	1.411	248	3.65	15.5	4.1	21.1	577	1038	217	8.9	8.27	0.858	2424	1744	105.5
58877	NO	3025	430.19	36.4	111.13	104.55	32.77	38.53	25.16	20.77	944	1078	203	1491	122	2.059	3.646	3.787	694	8.92	156.7	11.9	110.7	2269	2380	570	31.61	15.71	2.503	4042	4465	113.3
58889	NO	2612	301.83	19.3	59.73	89.25	35.383	29.348	15.76	7.46	194	213	22	226	10	1.198	1.72	1.325	461	2.28	9.5	3	49.7	709	1174	321	14.82	7.11	1.275	2959	1920	90.3
58894	NO	2912	403.89	20.8	99.24	85.01	16.53	31.906	28.534	13.27	65	187	198	1360	37	1.523	1.575	1.749	466	5.47	171.7	4.9	162.8	518	1271	361	15.97	7.79	1.645	3326	3812	186.4
58915	NO	2973	384.69	19	70.01	101.87	39.71	31.862	16.744	14.59	453	920	747	5139	160	1.482	1.755	2.05	547	3.11	64.2	3	305.7	946	1185	415	19.46	9.06	1.902	3085	2320	69.4
58916	NO	1295	163.62	5.7	50.15	51.07	12.86	22.064	12.576	6.36	573	581	2	116	1	0.845	1.419	1.501	150	6.56	4.8	4.9	23.8	900	1409	167	9.13	4.07	0.445	2524	1282	72.1
58922	NO	3731	512.65	37.5	128.45	141.62	55.067	47.062	27.013	8.96	956	1260	1114	3005	31	4.257	5.956	3.583	858	15.29	11.5	21.4	58	3134	3190	621	86.8	22.94	1.802	4304	4051	159
58938	NO	4012	415.95	39.5	149.31	196.87	78.606	77.632	28.885	9.35	797	872	17	883	33	2.622	2.543	1.971	553	2.65	60.1	4.9	111.2	2453	3100	430	23.74	17.8	1.623	6969	3163	218.2
58944	NO	1285	117.36	6.3	95.88	47.62	18.198	13.33	11.035	2.4	293	330	60	422	0	1.085	1.807	1.371	221	3.21	38.2	5	27.9	1230	1681	195	7.38	8.1	0.573	4037	2338	108.4
58947	NO	2312	307.56	21.2	81.99	86.95	28.963	29.425	21.813	41.26	912	1139	663	2360	102	1.263	1.457	2.72	471	7.25	293.7	1.9	99.5	1333	1507	338	11.96	15.17	1.333	3931	2473	103.9
58954	NO	1061	155.69	17.4	66.26	22.25	6.679	7.814	5.574	2.32	116	194	49	931	1	0.847	0.805	1.979	177	1.18	34.2	1.9	70.8	481	754	333	8.11	5.25	1.054	1941	3506	56.7
58960	NO	5842	380.75	12.9	273.27	353.73	120.169	133.584	61.208	15.62	881	930	54	539	124	3.457	4.636	3.396	634	21.9	200.5	19.1	86	1423	3222	413	36.27	34.98	2.304	9570	6163	445
58961	NO	1913	258.5	14.2	45.71	80.28	34.992	26.851	11.95	3.08	354	383	52	326	7	0.709	0.903	0.901	197	2.1	38.5	0.9	32.3	625	903	202	7.27	8.2	0.642	1685	1649	31.8
58963	NO	1138	90.39	4.2	79.55	51.12	12.895	19.487	14.292	3.85	164	177	23	74	165	0.891	0.834	1.523	128	1.53	5.5	2.2	25.9	138	837	112	6.45	5.42	0.361	2500	1099	102.4
58967	YES	2166	299.68	20.5	86.85	56.16	22.942	16.587	10.286	6.69	275	434	82	1751	218	2.059	1.878	2.205	555	3.28	204.3	3.4	247.6	1158	1382	285	26.38	8.71	1.208	3890	2535	113
58971	NO	2414	334.32	37.3	53.63	107.69	23.69	54.213	21.47	14.86	572	586	41	94	117	1.255	1.947	1.648	523	4.68	81.1	5.7	34.1	970	1718	610	30.63	12.93	2.505	2580	2858	45.4
58972	NO	3612	375.06	19.4	84.58	27.04	6.953	9.632	6.669	1.57	16	115	373	987	22	0.813	2.129	4.116	392	2.38	19.7	0.2	30.9	506	2097	609	7.85	9.34	1.008	2152	3247	93.1
58986	NO	2384	293.45	18.4	85.86	97.37	27.439	39.841	22.166	7.07	344	398	77	596	10	1.302	1.778	1.641	311	4.27	51.9	4.2	77.6	682	1322	281	13.07	11.99	2.127	2843	2942	128
58996	NO	3213	421.72	23.5	68.58	144.06	34.377	70.992	28.673	9.19	635	659	88	108	297	2.465	2.329	3.861	513	3.82	380.2	2.7	71.7	917	1905	345	16.58	5.94	1.653	6171	4876	77
59000	NO	3558	396.96	39.1	196.23	131.64	38.695	49.377	28.278	7.79	491	1248	2941	7596	25	2.72	3.696	4.095	495	4.95	142.2	5.6	73.2	1291	3297	614	25.69	20.25	2.125	5435	5742	213.1
59002	NO	2481	267.04	21.8	90.42	125.98	20.665	51.357	46.456	13.76	816	1062	35	2940	6	1.853	2.643	2.279	639	4.26	70.3	4.8	221	1117	1574	495	22.23	15.74	3.221	2909	3130	111.9
59009	NO	717	117.66	3.3	33.24	12.66	4.231	5.666	1.986	0.61	0	3	1	40	0	0.902	0.635	0.448	190	0.59	0.5	0.7	1.8	177	346	94	6.43	5.02	0.588	1080	573	65.5
59016	NO	1207	182.41	15.5	34.69	41.23	13.092	15.583	9.787	12.28	735	747	28	158	6	1.415	2.33	1.9	382	6.11	70.9	5.7	34.7	891	742	173	18.42	4.24	0.53	1295	1421	46.6
59018	NO	1833	250.87	9.5	79.8	56.31	18.604	17.509	14.472	3.7	156	191	30	399	1	2.093	1.499	1.06	432	3.72	8.9	3.2	37.9	1220	1142	232	15.47	13.1	0.955	3921	1425	140
59028	NO	2542	254.5	21.5	122.88	121.77	38.678	49.769	24.522	7.95	286	329	0	536	0	2.071	1.923	2.179	437	3.13	76.2	2	51.2	1179	1468	450	16.23	11.89	2.105	4167	3420	132.7
59030	NO	2992	380.35	40.4	126.99	116.71	48.063	46.206	14.336	16.18	1523	1657	56	1544	73	3.119	4.686	2.971	611	11.1	148.6	15.4	91.9	2435	3113	622	29.03	19.08	2.498	6885	4932	147.8
59032	YES	3189	354.24	15.3	149.13	115.18	35.816	54.519	16.258	7.69	109	388	1005	2820	82	2.302	2.836	2.501	562	10.87	69.6	1.2	62.1	603	1713	311	22.57	28.67	1.039	4286	2791	195.2
59039	NO	1904	273.93	28.4	91.75	51.26	12.561	21.326	12.86	10.08	243	794	1759	5674	156	2.029	1.769	1.913	548	6.48	93.3	7.4	132.1	573	1240	353	19.39	31.09	2.603	6493	3865	166.1
59055	NO	1396	176.59	13.7	57.01	44.71	17.996	15.489	7.224	9.46	575	602	22	279	61	1.512	2.113	3.565	720	11.44	40.5	2.3	30.1	758	893	189	21.25	9.12	0.751	2125	1943	76.6
59059	NO	3811	429.25	26.5	158.86	156.26	68.565	55.306	19.503	10.7	1179	1240	20	691	89	2.542	3.842	2.658	690	6.73	78	5.5	84.1	2232	2600	397	24.61	20.62	1.693	6622	4437	212.6
59060	NO	2797	107.94	4.4	150.73	175.65	53.604	65.684	43.411	7.32	151	181	5	338	2	2.616	2.795	2.227	189	4.75	4.4	9.4	134.4	661	1819	243	12.08	20.8	1.049	4752	2629	183.2
59064	NO	680	109.92	4.1	29.02	13.59	2.943	4.579	4.695	1.51	52	52	0	0	2	0.594	0.494	0.447	114	1.34	39.8	1.4	6.2	109	405	90	4.42	1.67	0.28	516	782	61.9
59072	NO	1958	223.85	19.5	78.08	81.2	20.969	32.544	22.455	8.85	206	243	63	393	28	0.981	1.821	1.588	334	1.39	26.6	2.6	23.6	815	1333	328	8.31	7.99	1.065	2482	2490	71.3
59076	NO	2313	331.48	62.4	72.49	84.46	21.739	41.556	15.12	15.24	151	378	492	2338	263	1.863	1.503	1.761	542	1.07	152.6	1.7	94.1	1202	1215	349	15.24	9.82	1.68	4398	3239	107.1
59078	NO	2234	153.22	8.2	128.66	88.71	21.93	38.991	19.408	7.95	311	316	3	59	25	1.132	2.153	2.679	310	10.38	72.2	2.7	50.1	494	1596	317	10.16	11.62	1.199	4083	3114	191.4
59079	NO	1773	205.22	14.6	96.08	64.19	21.975	22.936	11.592	4.02	177	225	81	526	9	2.241	2.527	2.093	271	4.54	105.5	2.2	56.2	1252	1584	356	19.56	14.46	1.46	4245	2449	141.9
59095	NO	1486	167.74	13.8	67.14	61	25.96	16.764	11.773	8.85	347	969	0	7474	9	1.581	1.692	1.816	398	2.65	29.7	2.9	579.8	419	935	271	9.64	6.56	1.114	2419	1923	159.1
59105	NO	3600	292.61	31.2	210.45	176.56	61.098	62.244	39.959	14.08	1069	1495	1345	4427	42	3.344	4.021	4.16	558	7.23	202.5	16.1	205.9	2378	3262	510	21.41	21.81	2.613	7917	5068	300.6
59106	NO	1363	163.12	7	75.09	44.21	12.182	15.879	10.993	3.96	147	209	15	742	5	1.414	0.961	1.356	497	1.29	19	1.1	71.1	479	708	181	10.96	7.12	0.875	3103	1205	112
59109	NO	1457	205.94	11.6	65.34	41.99	12.213	18.933	7.43	2.8	20	550	69	6295	51	1.595	0.901	1.268	377	3.64	167.7	1.4	34	617	938	183	13.46	9.82	0.914	2755	2303	109.3
59110	NO	595	43.52	3.4	41.28	27.84	9.552	11.298	4.37	1.5	36	59	29	257	7	0.26	0.371	0.855	53	2.27	5.4	0.9	11.8	175	433	116	4.22	5.93	0.349	1119	1030	33.9
59113	NO	3760	587.3	43.8	111.5	113.2	30.129	38.488	37.11	11.18	257	338	127	823	153	2.759	2.766	1.869	724	2.43	218.2	2.2	155.5	1568	2380	574	26.33	18.8	2.46	4547	3678	184.7
59117	NO	3965	340.01	26.7	227.49	196.02	65.647	78.117	36.374	13.49	519	547	79	310	0	4.18	3.48	5.705	536	7.9	38.9	6.2	40.9	688	2528	608	27.98	25.68	2.796	7090	5446	275.1
59122	NO	3886	326.26	24.9	109.88	191.32	48.298	64.547	60.577	22.63	536	983	42	5324	39	3.51	2.113	2.036	815	4.99	104.2	1.7	460.9	1098	1828	391	23.22	11.14	2.059	8994	3694	211.4
59124	NO	4228	484.2	33.8	193.9	156.52	63.42	49.552	28.67	11.11	837	1145	48	3661	12	4.793	3.15	3.149	1136	12.68	74	31.5	126	1846	3150	462	32.32	17.7	1.983	8963	3638	330.4
59125	NO	2603	366.1	21.8	46.9	113.06	33.766	42.303	26.721	8.44	88	1365	7673	11479	46	1.073	1.368	0.815	292	1.87	62.7	0.8	84.5	424	843	258	18.88	7.6	1.415	2836	2327	84.2
59128	YES	1589	146.01	9.1	53.36	88.89	29.127	36.774	15.871	4.1	208	217	2	105	15	1.199	2.065	0.823	235	2.87	18	4.1	24.8	441	928	179	12.56	7.98	0.856	3415	1704	85.7
59130	NO	3303	387.43	34.4	116.37	127.43	49.64	40.746	24.549	21.21	1250	2995	178	20359	1015	1.93	4.631	3.314	799	7.03	320.6	14.9	1496.5	3090	2565	798	18.49	15.09	2.453	6011	5646	173.1
59133	NO	2003	301.36	15.3	81.74	52.41	11.389	20.78	12.778	3.55	51	101	96	546	27	1.564	1.328	0.91	332	10.52	27.9	5.6	39.2	459	1135	176	11.83	6.49	1.128	2589	1905	101.5
59140	NO	1968	249.18	25.3	78.22	80.85	26.633	34.972	14.362	9.4	189	207	24	172	69	1.603	2.029	1.849	555	4.1	93.4	3.8	19.1	1316	1394	364	12.88	12.39	1.396	2839	2972	69.1
59148	NO	2393	311.26	20	128.29	69.05	17.056	23.647	19.43	9.11	477	645	87	1952	78	2.005	2.098	3.544	551	13.66	150.8	42	278.6	967	2069	325	17.97	9.08	1.447	4045	3480	175.3
59151	NO	1989	256.22	22.8	77.24	79.23	36.98	28.059	8.616	6.04	334	433	49	1006	297	1.314	1.889	1.184	229	4.23	84.1	3.5	52.4	1267	1477	293	14.79	11.55	1.496	3689	3255	84.6
59152	NO	2494	365.16	23.7	95.25	70.78	17.375	26.53	21.215	8.38	156	185	24	303	67	1.996	1.141	1.66	711	1.39	94.1	0.2	63.9	551	1025	370	22.29	12.72	1.793	3937	3207	100.1
59156	NO	2608	422.79	21.1	79.95	71.76	25.653	28.018	11.751	9.83	289	942	1365	6309	1654	2.955	2.079	2.947	1132	1.77	1059.9	4	87.1	953	1423	437	12.34	8.6	3.063	4771	7280	87.5
59157	NO	2316	246.85	18.3	107.51	79.01	18.46	29.471	18.795	8.39	268	630	297	4192	26	1.476	2.243	3.138	385	4.79	222.1	1.3	96.7	488	1454	346	15.12	16.43	1.585	3861	4138	112.2
59167	NO	1437	128.01	8.3	109.55	30.13	7.225	9.99	8.905	5.98	162	553	1239	4043	66	1.304	2.122	3.391	394	2.62	86.9	0.6	165.2	204	1091	268	8.37	7.47	0.625	3573	2586	117.7
59179	NO	1137	149.5	10.4	59.83	35.17	11.931	11.621	7.577	1.54	561	564	0	27	1	1.264	2.008	1.588	323	4.58	9	7.1	7.6	852	1311	227	16.06	12.2	0.5	1397	1597	73.8
59185	NO	2892	114.39	15.7	118.68	171.35	25.464	78.323	55.877	32.1	373	426	35	595	81	1.409	2.272	3.191	307	15.54	11.7	34	123.7	540	1901	475	12.92	8.53	1.572	3448	3409	202.5
59199	NO	300	32.59	3.5	21.68	10	1.894	3.817	3.084	0.9	5	11	30	59	0	0.123	0.265	0.85	30	0.43	11.4	0	8.9	17	198	55	1.25	1.84	0.173	463	706	24.6
59200	NO	6035	439.32	22.2	332.91	324.41	126.079	108.342	55.606	21.75	2487	2587	6	1032	53	5.906	10.882	3.932	690	23.53	16.6	45.1	134.7	4650	6152	681	31.41	36.8	3.779	12726	7691	651.4
59206	NO	2216	252.91	21.7	87	97.31	39.274	31.917	17.652	16.66	1543	1565	39	223	36	2.449	3.786	3.43	696	12.81	193.5	11	56.8	1256	1093	316	34.44	21.72	1.478	2806	3444	80.3
59213	NO	1430	202.81	27.5	40.2	30.97	5.739	11.745	10.608	5.78	160	653	1441	5158	3	1.506	1.249	1.366	464	0.99	88	1	205.5	460	728	300	11.83	5.79	1.424	1713	2432	93.3
59214	NO	3416	359.36	24.7	150.09	155.75	54.068	49.748	38.291	28.5	1186	1302	224	1252	16	5.234	5.879	6.519	1177	27.72	80.3	67.3	128.6	1565	2657	416	47.89	38.95	1.523	6197	4542	198.2
59216	NO	2115	189.4	5.8	36.82	27.23	9.58	11.533	3.864	2.09	28	504	2067	4681	9	0.6	1.258	2.369	273	2.35	9.1	0.4	14.2	258	769	291	4.88	4.77	0.533	1751	1761	39
59223	NO	2015	157.85	18.9	92.87	113.3	23.322	38.725	43.037	10	227	1535	5817	12804	16	1.247	1.629	1.97	233	5.14	42.9	4.1	182.3	668	1296	224	9.37	8.18	1.046	4192	3023	119
59226	NO	921	117.41	9.7	39.4	33.31	14.027	10.73	5.156	2.43	262	304	19	434	107	1.262	3.049	1.173	257	4.16	8.7	5.7	19.2	1011	954	185	13.59	5.61	0.584	2117	2067	43.3
59229	NO	2465	437.04	13.6	55.44	61.42	21.141	22.423	11.326	3.03	210	216	1	66	7	0.781	0.706	0.682	324	2.48	5.4	2.8	26.9	747	1227	181	11.06	8.61	0.963	2191	1404	67.7
59232	NO	2796	195.31	18.7	141.94	134	47.891	50.299	22.34	10.06	495	554	0	678	0	1.308	1.998	4.557	353	14.01	49.8	2.4	81.6	1176	1742	497	20.26	24.05	1.913	4433	5088	129.2
59236	NO	3790	593.63	53.7	102.07	127.81	38.697	45.955	33.662	14.85	592	1316	1491	7583	808	4.514	3.113	2.592	886	4.85	437.3	10.3	332.7	2254	2288	668	24.17	13.52	2.944	4617	4956	189.8
59237	NO	1568	298.87	35.7	52.28	27.54	4.283	7.409	13.51	6.55	73	939	2264	9229	68	1.426	1.429	2.211	499	0.5	166.5	4.7	255.4	680	837	484	14.07	6.25	1.759	2655	3577	112.5
59239	NO	1792	204.45	15	69.19	80.05	23.882	26.549	19.093	16.04	552	704	369	1630	61	2.13	2.929	3.289	647	5.64	48	1.6	129.4	379	949	261	21.58	16.02	1.025	2985	2889	96.7
59246	NO	1731	220.99	19.2	86.43	57.03	19.701	17.817	13.489	5.76	188	673	1840	4885	22	1.735	1.549	1.495	412	1.51	82.9	3.2	119.2	897	1526	275	16.49	7.58	1.074	4907	2457	150.8
59248	NO	2656	306.61	17.2	117.23	108.9	30.643	39.722	30.861	7.6	310	349	27	430	1	1.596	2.418	2.44	293	4.56	96.9	7	39.1	1545	1967	379	11.72	12.97	1.936	4366	3319	140.7
59249	NO	1339	192.68	6.8	47.62	42.5	11.245	16.941	10.97	4.95	352	467	0	1402	8	0.755	1.229	1.083	324	1.57	126.8	3.6	218.6	408	742	130	7.97	5.19	0.507	2097	1402	76.9
59284	NO	2463	306.9	16	44.07	101.31	25.704	35.485	32.575	9.19	231	299	30	778	95	1.1	1.441	1.308	423	1.49	252.9	4.5	144.3	1192	956	275	10.33	6.53	1.175	2589	2438	54
59294	NO	3243	415.99	21.2	132.47	98.69	24.009	38.604	27.838	9.36	499	576	351	702	123	2.171	2.207	3.957	620	4.73	88.3	5.1	139.7	859	1850	377	25.67	15.06	1.36	5474	3636	197.3
59295	NO	2262	293.92	20.1	91.32	82.84	37.144	31.333	10.059	8.6	610	649	37	453	15	2.162	2.183	4.44	685	13.22	64	1	37.3	993	1363	297	19.89	13.18	1.43	4788	3186	142.5
59304	NO	2628	394.89	14.6	63.23	60.43	17.322	26.804	11.38	4.93	679	718	45	432	14	1.749	2.283	2.227	643	6.96	25.5	6.6	28.1	1154	1329	361	27.27	16.96	1.194	3229	2602	90.6
59306	YES	1823	83.69	4	182.89	81.06	31.265	30.176	11.162	10.67	1114	1120	0	90	12	1.656	4.103	5.649	743	25.81	33.5	13.6	17.4	1223	2276	284	27.01	25.37	0.79	3465	3648	232.4
59316	NO	2588	223.59	4.7	152.82	117.54	50.277	40.476	17.024	3.53	1018	1025	0	103	12	1.626	4.122	1.663	368	5.99	7.4	11.9	14.5	1710	2110	293	15.07	14	0.765	5142	3089	187.6
59320	NO	1798	178.74	7.1	67.17	79.1	28.88	24.86	19.239	8.11	576	612	41	359	155	1.196	2.532	1.359	324	3.76	164.3	6.9	71.2	988	1355	229	10.49	8.25	0.861	2323	2678	108.6
59321	YES	2010	232.54	19.9	100.43	61.72	17.405	23.482	14.453	22.55	834	948	11	1370	5	1.574	2.82	4.741	768	17.72	124.9	8.9	58.1	1191	1811	314	13.08	32.12	2.623	3981	3002	138.8
59324	NO	2563	283.63	10	123.68	106.22	30.256	41.389	23.579	8.37	302	339	32	264	321	1.607	1.769	2.39	373	5.58	157.4	2.8	60.8	768	1301	300	14.67	18.01	1.498	3987	3023	160.5
59329	NO	563	62.4	4.6	24.07	25.43	10.329	8.767	3.919	2.09	186	193	30	65	5	0.484	0.703	0.755	95	0.83	10.5	1.8	6.6	181	365	80	3.57	2.34	0.31	848	940	43.7
59334	NO	1703	198.42	12.4	146.48	34.99	10.351	10.895	9.818	27.33	1928	2081	359	1640	34	3.086	3.553	3.784	859	8.96	137.3	13.9	324.8	1902	2286	689	34.53	31.14	3.733	3806	4034	104
59337	NO	3622	331.95	24.5	322.49	112.99	35.445	45.343	15.491	8.34	8	81	37	766	189	7.901	3.981	4.6	283	7.74	53	12.4	206	487	4424	471	24.87	38.37	3.685	17638	11238	528.5
59345	NO	1377	161.32	16.9	80	47.23	19.044	15.746	4.491	3.92	148	700	2331	5353	217	1.107	1.694	2.029	258	1.87	150.2	5.4	86.1	1556	1192	242	6.92	6.27	0.989	3101	2741	98
59346	NO	1926	235.31	8.6	84.35	75.36	19.616	30.621	17.648	5.79	6	6	0	9	0	0.619	0.549	2.633	89	4.35	61.9	0.6	55	120	887	220	8.25	14.88	1.11	2307	2654	82.5
59348	NO	2292	264.47	10.8	85.79	76.88	15.854	30.374	24.818	10.01	442	493	45	600	19	1.624	2.003	1.643	461	2.29	18.1	4.2	61.5	484	1370	258	16.14	7.97	0.955	3925	1962	159.8
59352	NO	1146	180.75	19.5	34.62	35.46	11.688	9.337	11.585	3.48	101	218	255	1242	1	1.126	1.314	1.312	305	0.32	48.7	0.2	52.5	520	626	232	8.95	4.92	0.859	1748	2111	60.4
59367	NO	3985	388.27	19.9	176.06	192.13	58.262	68.024	43.948	23.4	772	1130	28	4243	21	2.77	3.171	2.441	790	5.16	202.4	3.6	193.1	1578	2119	380	28.26	18.81	1.598	7401	3503	221.6
59378	NO	2572	284.71	11.1	122.76	84.86	21.686	31.216	23.844	6.97	425	431	0	66	55	1.099	2.05	2.286	429	2.85	139.6	5.1	17.7	655	1446	267	17.09	11.38	0.837	3153	2508	185
59379	NO	2182	238.84	15.9	89.59	81.38	24.369	22.364	25.664	11.45	641	715	3	882	1	2.123	3.282	2.755	436	6.29	78	2.9	109.5	858	1538	324	20.49	8.53	1.042	4349	2726	129.3
59384	NO	3638	503.64	27.9	152.68	118.83	45.947	44.053	19.117	12.36	1205	1306	62	1101	179	3.068	4.442	5.069	930	12.69	221.3	11.5	108.9	1985	2650	577	31.23	29.55	2.705	4798	5555	196.3
59390	NO	3714	395.25	22.8	134.19	190.65	40.315	86.28	48.014	30.8	125	129	9	50	23	1.735	1.88	1.57	392	4.41	4.4	11.2	69.3	751	3305	653	18.7	11.8	2.151	6295	4072	167.5
59391	NO	3365	184.95	19.3	166.26	181.47	45.071	88.889	31.455	21.44	110	350	1015	2396	1	1.618	1.762	2.304	362	10.95	33.1	11.7	56.4	463	2429	574	18.01	27.93	3.125	5235	3507	223.7
59392	NO	1328	121.65	9.8	80.98	58.34	17.43	21.322	14.63	4.88	122	188	63	760	1	1.039	1.084	1.154	206	3.01	15.8	1.6	31.7	962	1061	272	10.11	10.04	0.909	3857	2216	102
59397	NO	2218	352.24	11.1	59.98	67.45	33.316	23.331	6.309	4.66	864	902	20	449	77	1.314	3.853	1.465	240	6.85	86.7	13.1	21.6	1697	1671	279	10.85	9.58	1.066	2578	3266	62.1
59398	NO	1514	277.3	12.1	44.09	30.45	14.758	8.905	5.32	2.79	335	346	62	132	1	3.633	5.556	3.999	2457	5.02	3	7.3	6	1382	1150	434	50.01	29.15	0.784	1855	2977	42.1
59399	NO	1945	144.67	8	128.34	92.03	41.356	32.012	8.522	6.07	1071	1230	544	1593	9	1.558	3.595	2.458	370	13.83	26.2	11.7	32.6	1031	1632	217	23.24	34.44	0.897	1817	2454	147.1
59403	NO	1915	209.95	15.8	72	91.7	38.267	29.525	17.046	12.56	675	5793	23056	49909	13	1.208	1.899	2.679	180	6.17	99.3	16.9	134.8	946	1421	343	8.32	6.33	1.138	2824	4000	98.5
59405	NO	3258	412.06	25.2	132.45	127	42.827	48.738	22.271	11.34	1377	1868	1755	4981	82	2.575	4.577	2.757	554	13.36	46.7	19	132.2	2277	2754	484	24.89	19.96	1.651	6194	4715	147.6
59408	NO	3532	242.82	16.2	66.39	93.27	34.97	35.539	13.276	8.61	399	1229	2229	8836	29	2.052	4.404	2.179	533	3.02	294.8	5.1	81.7	645	1188	355	16.27	10.45	2.852	5086	4863	110.5
59412	NO	1400	135.22	3.8	59.08	70.03	20.677	22.256	22.872	4.69	570	577	10	82	22	0.861	2.438	0.973	246	5.32	5.5	12.3	46.1	1422	1325	235	3.74	6.3	0.808	2361	2476	70.3
59415	NO	1160	157.95	16.7	63.65	32.8	12.837	10.116	5.918	3.91	392	1720	5864	13012	33	1.237	1.586	1.828	263	5.17	47.6	3.5	43.6	725	969	227	13.64	12.01	0.724	2346	2330	80.9
59418	NO	2852	424.53	61.2	109.19	93.84	24.923	41.171	14.508	14.47	247	2128	156	22289	399	1.451	2.442	3.423	372	5.99	277.9	4.9	73.7	1046	1802	580	17.56	20.42	2.666	3595	6092	100.3
59419	YES	2201	81.62	11.1	171.71	130.08	34.12	49.255	30.802	18.54	569	633	148	665	43	1.325	1.796	2.896	243	17.85	108	65.8	93.2	740	2042	296	9.72	11.96	1.118	4625	3363	222.3
59420	NO	2738	318.63	18	78.53	132.2	41.842	41.602	33.543	11.88	472	721	155	2871	87	1.437	2.264	1.599	472	3.22	38.3	6.8	214.2	690	1246	310	16.96	8.66	1.652	3741	2518	144.1
59425	NO	2783	321.06	25.7	101.52	105.2	30.095	41.379	24.637	11.15	163	216	24	661	37	1.499	1.47	2.691	383	4.17	328.8	2.3	91.2	350	1334	428	20.52	16.87	1.828	3344	5301	111.7
59426	NO	2468	381.56	20	103.89	59.52	26.74	15.585	7.746	4.37	410	463	124	593	10	3.258	2.047	2.568	581	3.58	74.8	5	32.3	1042	1582	309	17.04	11.06	1.68	5405	3809	188.5
59427	NO	1306	185.31	6.8	44.76	43.4	16.9	15.138	7.902	1.92	504	506	0	36	0	1.723	2.041	1.341	339	5	11.9	4.9	13.4	865	976	154	6.59	6.6	0.48	1884	1602	69.1
59428	NO	2952	233.4	25.4	124.04	151.36	38.773	57.814	43.171	17.07	248	330	53	936	74	3.527	2.998	3.369	472	3.77	83.7	4.7	160.1	880	1957	550	13.77	14.98	2.093	4353	4841	126.8
59432	NO	1912	247.33	18.6	107.95	57.96	13.531	22.587	13.888	9.72	175	371	13	2219	309	1.848	1.376	1.909	457	5.77	128.1	7	235.3	610	1668	327	10.22	8.92	1.463	4106	2900	195.6
59433	NO	2813	441.38	47.5	91.47	73.66	16.363	32.257	18.363	17.09	100	1832	2603	19391	203	3.52	2.808	2.95	1175	1.95	141.5	0.3	874	879	1307	503	31.37	13.82	2.503	5061	5703	169.3
59434	NO	1821	179.93	14.9	81.07	89.19	42.514	26.804	11.243	5.56	526	596	84	647	318	1.499	1.745	2.043	361	3.73	105.5	4.7	61.6	615	1025	229	13.46	13.27	1.107	3528	2874	102.2
59437	NO	1726	153.97	10.5	96.43	80.08	24.415	30.353	18.589	4.1	402	441	76	400	67	1.378	2.243	1.707	219	7.88	28.9	10.3	47.6	959	1582	237	13.03	12.97	0.755	3039	2236	154.6
59440	NO	2089	242.65	16.9	73.71	93.69	30.831	35.669	19.811	3.84	255	414	56	1895	10	1.833	2.086	2.058	562	8.33	55.7	5.1	68.8	734	1189	265	30.33	14.77	0.948	3025	2874	98.7
59441	NO	1558	196.3	27	85.88	51.75	13.376	18.869	15.417	5.22	334	348	41	147	21	1.204	1.599	2.444	113	2.48	12.1	5	17.4	729	2015	420	9.04	10.39	1.091	1763	2211	147.1
59442	NO	2232	333.68	15.3	70.34	71.14	25.44	19.726	13.131	3.46	490	513	38	198	196	2.145	2.555	1.022	521	3.48	128.3	6.1	16.4	1257	1273	291	11.7	8.15	0.793	2380	2459	131.1
59448	NO	4229	348.33	16.5	136.58	124.89	34.164	50.461	22.273	3.85	43	75	42	343	29	1.982	3.141	3.907	614	5	16.7	4.7	49.9	1021	2058	495	16.53	11.96	1.256	6759	3812	212.7
59451	NO	1250	171.64	15.9	45.51	45.74	20.208	15.327	7.114	2.87	384	411	6	291	8	1.092	2.136	0.918	265	3.03	162	8.3	25.2	1305	1124	253	6.96	6.18	0.958	1786	2109	65.1
59460	NO	4031	456.19	25.7	143.93	126.49	41.671	46.986	25.755	9.47	186	251	116	532	358	2.169	3.226	5.041	1161	7.76	59.8	5.2	63.8	1061	2220	569	28.31	39.72	2.058	4302	5051	134.4
59461	NO	4107	429.6	24.5	200.57	91.21	34.104	30.217	16.637	20.33	1011	1206	107	1814	974	2.05	3.455	4.767	693	13.86	421.7	11.4	59.5	2165	3795	789	14.86	19.39	2.778	11197	6344	335.1
59469	NO	1754	241.5	29.1	73.15	59.61	17.813	21.082	15.907	8.4	585	666	46	935	21	1.743	2.14	2.422	292	4.47	90.6	1.7	197.5	815	1330	390	14.76	8.49	1.471	4019	2399	110.1
59486	YES	2611	348.17	17.8	112.4	85.95	30.852	37.834	9.504	5.3	153	710	2274	5539	29	1.509	1.87	1.929	323	6.96	44.5	1.8	87.6	453	1235	232	29.43	19.57	1.835	6031	3506	140.2
59495	NO	2507	360.04	36	71.2	51.04	18.283	19.685	7.798	6.6	579	1029	1619	4558	122	2.469	2.875	3.992	568	6.38	235.2	3.8	163.7	654	1506	498	26.31	14.23	1.743	4149	4938	74.8
59497	NO	2974	334.03	20.4	90.19	148.6	51.324	58.582	27.714	15.98	931	1439	33	6068	22	1.923	3.088	2.045	468	3.36	20	5.5	34	1109	1590	377	17.25	10.32	1.292	3308	2671	133.5
59499	NO	2786	177.73	11.5	127.16	132.72	25.544	38.796	57.12	11.78	162	251	165	945	102	1.263	1.703	3.862	323	5.51	31.5	5.8	167.9	580	1566	338	9.85	7.23	0.932	4090	2978	227.5
59515	NO	1803	192.13	7.4	69.81	51.29	9.859	21.267	16.387	7.46	261	282	0	225	61	0.803	0.984	1.503	270	6.99	23.2	5.9	40.4	397	1084	251	6.55	6.7	1.603	2644	2257	153.6
59521	NO	2866	338.47	25.7	139	111.28	47.363	39.3	12.963	19.54	1463	1700	140	2425	531	5.778	6.46	4.939	888	16.6	283.1	28.4	67.2	3056	3295	673	28.17	24.74	2.961	3723	6004	163.3
59537	NO	4650	553.61	25.3	179.21	182.39	64.039	67.841	34.393	17.49	892	1058	7	2005	12	3.812	4.827	2.865	816	11.81	37.9	12.5	134.1	2771	3712	553	27.96	26.76	2.368	8365	5509	276.8
59539	NO	3601	628.53	14.3	80.41	91.23	42.876	28.482	11.676	3.49	566	575	0	102	8	2	3.284	0.665	852	2.23	3.3	3.3	13.2	824	1274	663	15.87	9.29	1.906	2987	3826	218.7
59541	NO	1948	261.08	28.4	132.01	43.38	10.431	14.869	13.164	6.42	189	237	20	535	87	3.296	2.325	3.06	402	1.98	36.6	0.9	103.7	875	2027	518	16.56	12.78	1.694	5954	3750	224.9
59542	NO	2611	370.31	24.5	103.14	80.96	21.204	31.31	18.721	5.92	105	118	4	152	4	1.881	1.674	1.541	631	4.07	11.1	1.4	60.2	708	1453	308	20.69	15.95	1.316	3705	3122	156.1
59546	NO	615	90.74	4.1	22.21	17.92	4.727	5.679	5.749	13.12	214	222	8	90	8	0.606	0.283	0.745	154	1.99	76.3	0.4	9.1	544	378	119	3.62	4.45	0.406	1423	588	37.5
59556	NO	2268	201.72	5.9	105.65	106.68	39.929	35.78	23.784	5.91	482	492	0	90	1	1.481	1.869	2.148	217	3.21	3.7	2.6	35.6	993	1621	221	10.08	8.63	0.774	4049	2310	123.9
59560	NO	3018	274.42	33.5	157.39	141.24	50.316	56.203	22.01	12.55	386	689	876	3175	61	1.486	2.64	2.638	353	6.7	142.7	1.4	123.5	2554	2631	601	17.32	23.49	2.463	5773	4525	135.8
59561	NO	4161	326.17	42.7	204.08	225.92	61.968	110.566	40.061	20.82	606	1530	1345	10406	27	4.183	4.532	3.472	1092	9.99	75.7	10	638.9	1150	2666	593	36.88	29.78	2.766	9352	4988	304.3
59566	NO	1421	110.45	3.5	58.68	49.29	12.25	17.791	15.691	4.49	36	42	3	70	7	0.715	1.624	1.049	169	5.33	3	1.8	32.2	240	1196	194	4.24	2.45	0.355	2390	2010	88
59580	NO	1952	276.46	28.5	90.28	54.44	12.206	18.899	18.988	4.68	263	284	4	257	13	1.979	2.019	1.688	476	4.73	12.8	5.3	57.7	1030	1753	412	14.94	11.8	1.457	3282	3346	128.7
59582	NO	1390	204.48	19.5	48.23	43.51	14.296	16.09	9.619	3.18	149	152	1	25	3	0.987	1.146	0.832	328	2.43	34	4.4	26.5	644	970	206	9.85	7.07	0.754	1991	2072	60.2
59594	NO	3137	393.04	22.2	101.71	136.15	33.961	49.335	43.122	13.57	163	213	83	518	58	2.103	4.507	11.766	410	11.01	43.1	2.8	101	1096	1596	371	15.69	9.51	1.389	4157	3383	121.8
59598	NO	3144	336.51	18.3	182.3	119.65	40.262	46.402	21.197	5.38	574	696	434	1227	34	1.792	2.721	2.98	245	12.13	31.8	20	67.4	1072	2543	417	14.88	16.79	1.496	5892	3774	199.9
59600	NO	2478	387.11	15.1	107.68	57.75	23.817	21.042	7.019	4.38	770	880	41	1235	134	1.391	2.794	2.38	503	8.83	28.8	7.6	37.4	1275	1774	284	27.37	19.24	1.016	3233	3072	127.4
59604	NO	1412	209.28	15.6	48.13	48.2	12.991	17.417	13.574	4.82	463	512	30	583	0	1.431	1.882	1.382	367	3.61	20.5	6.5	24.3	1006	1137	312	18.73	9.31	1.236	3257	2645	89.1
59605	NO	2219	333.56	32.1	119.13	53.95	10.193	20.734	14.313	10.06	766	800	49	368	65	2.946	3.773	5.732	572	17	125.1	41.9	45.6	1108	2357	610	26.14	10.95	2.486	4087	5494	157.4
59612	NO	1294	157.32	15.6	53.19	51.52	11.185	20.895	16.615	7.78	105	357	202	2903	19	1.291	1.193	1.114	376	0.83	37.6	1.5	177.1	332	666	238	11.31	7.19	1.002	1446	2516	55.7
59615	NO	3165	284.37	7.5	68.68	108.48	54.107	32.914	13.277	5.33	125	137	33	134	0	1.319	1.531	1.743	515	1.78	1.8	0.3	54	887	1158	310	10.12	6.63	0.887	3527	1596	112
59616	NO	3411	447.79	16.8	139.62	120.86	49.844	45.143	12.276	5.3	838	861	1	284	18	1.95	3.658	2.748	387	11.96	86.9	10.9	46.4	1857	2213	389	18.6	28.19	1.717	4815	4851	124.1
59631	NO	3826	559.61	33.5	116.94	131.42	54.129	33.887	30.735	11.64	821	918	21	1112	63	4.283	2.867	1.52	1304	5.42	98.6	3.5	135.5	2323	2450	364	35.59	17.92	1.858	6351	3469	189.1
59638	NO	2399	362.24	13.8	50.48	87.89	22.154	33.385	24.374	5.13	113	834	1390	7953	2	0.674	1.366	1.258	179	1.65	113.1	0.4	51.1	423	766	210	9.49	7.44	0.909	2304	2346	44.3
59640	NO	3255	333.51	24.7	235.75	102.19	30.544	32.892	21.07	8.37	74	293	636	2299	58	1.921	2.815	4.437	322	11.37	7.4	1.9	142.3	840	2452	491	25.69	45.05	1.918	5914	4522	301.2
59642	NO	1389	190.04	14.5	57.73	49.73	8.707	21.134	14.734	37.44	178	905	894	8244	103	0.872	2.106	4.228	676	14.42	251.1	19.7	24.5	374	896	281	7.32	5.48	1.263	1752	2639	72.1
59659	NO	1836	284.12	17.4	46.88	63.2	17.079	23.834	17.23	9.07	298	398	127	1107	114	1.734	1.318	1.457	419	2.59	48.6	8.4	108.4	623	696	228	14.49	5.83	1.14	2378	2358	68.1
59666	NO	1638	133.5	18.5	82.71	49.22	11.33	21.257	11.809	10.74	107	2061	67	23262	274	1.233	1.734	2.226	810	0.64	75.8	0	1842.9	766	955	509	21.84	9.22	1.567	2875	3370	93.7
59673	NO	1403	132.72	12	37.48	59.03	17.376	23.511	14.296	6.49	327	373	12	541	12	0.681	1.334	1.095	165	1.66	40.9	3.9	33.7	416	742	199	6.27	4.79	0.861	1993	2026	67.4
59678	NO	3379	419.07	12.5	111.45	141.09	50.816	48.416	30.215	10.35	844	871	10	289	25	1.786	8.011	11.919	343	18.67	38.2	8.3	100.7	1972	2154	272	17.07	13.78	1.367	4972	2827	167
59689	NO	986	171.68	21.2	29.27	23.11	3.461	8.017	8.222	9.55	0	246	557	2642	20	1.001	0.708	1.271	311	0	33.2	0	78.4	291	435	240	7.25	3.68	1.247	1815	1967	82
59692	NO	1423	175.65	11.2	58.37	55.9	16.208	18.796	14.456	6.02	515	544	28	329	105	1.074	2.614	1.111	255	4.74	100.1	9.8	52.1	788	1146	197	9.99	6.12	0.806	2640	2236	118.5
59694	NO	1428	247.08	37	69.14	23.34	6.845	7.828	6.284	12.51	297	532	809	2376	76	1.395	1.752	2.552	443	4.38	76.9	2.3	48	852	1346	417	15.85	9.08	1.735	2290	3394	51.3
59704	YES	1627	174.56	11.1	54.55	79.1	17.028	30.046	25.566	11.03	597	631	180	316	50	0.766	1.821	1.813	254	4.82	11.9	5.1	92.5	395	970	162	11.05	5.72	0.809	3005	1708	122.3
59707	NO	2330	307.04	24.8	83.09	88.98	18.694	33.573	29.274	8.16	405	535	480	1291	31	1.937	2.272	2.707	535	7.83	67.8	7.1	120.6	1101	1906	319	15.5	9.85	1.043	3629	3762	130.4
59710	NO	2785	261.58	10.9	138.58	130.6	51.064	48.622	16.571	5.96	293	343	32	570	7	1.903	2.778	1.904	405	9.16	23	4.4	49.8	1796	1861	285	19.84	22.11	1.184	4249	2708	203.7
59715	NO	4139	740.4	6.9	74.13	83.42	30.968	33.179	12.959	4.91	146	161	10	189	10	1.218	1.625	1.256	276	5.07	15	0.7	33.1	849	1251	214	11.42	12.72	0.598	3130	1652	74.5
59716	NO	2826	334.48	12.5	92.46	94.29	36.673	29.33	20.258	6.7	368	401	18	365	19	1.973	1.76	1.239	446	3.27	5.5	1.3	34.3	1363	1795	292	13.87	10.87	0.886	4637	2149	133.8
59725	NO	1449	181.02	9.2	41.1	64.55	26.284	21.551	10.085	5.92	385	434	4	584	5	0.861	1.579	1.337	224	4.54	49.2	1	37.1	753	751	169	7.88	6.87	0.795	2264	2075	45.3
59728	NO	3125	464.04	10	99.02	99.36	34.849	36.53	18.807	9.24	1091	1366	200	2885	640	1.404	3.426	2.556	316	5.35	178.3	8.5	272.3	1958	2221	326	16.92	10.74	1.169	5532	3423	137.3
59733	NO	1147	137.34	5.9	52.14	44.2	12.753	17.205	10.316	5.13	228	247	64	93	227	1.219	1.442	1.833	226	2.17	282.1	10.2	21.1	1791	1019	183	5.04	4.99	0.822	1971	2792	75.2
59740	NO	1265	154.65	8	48.33	40.55	12.933	16.827	7.604	5.57	415	418	12	13	43	1.065	1.248	1.385	232	7.5	52.5	4.1	24.2	811	1025	170	13.4	3.91	0.886	2280	1235	63
59741	YES	990	153.74	7.9	17.37	12.81	3.894	4.289	3.493	2.79	51	674	3028	5954	77	0.433	0.845	1.134	127	1.06	92	2.3	23.8	704	494	178	2.55	3.43	0.528	987	1330	27.8
59742	NO	1883	218.95	14.3	69.2	84.45	29.723	33.578	11.538	3.79	130	455	39	3906	7	1.386	1.29	1.328	260	4.65	89.8	1.4	55.3	716	916	224	13.19	12.85	1.385	3116	2527	93.9
59751	NO	1958	214.68	26.7	97.01	86.53	17.742	38.745	23.828	22.34	275	678	545	4455	158	2.093	2.382	3.502	596	4.91	211.1	3.1	316.7	1035	1799	657	20.99	14.69	2.961	3496	4337	191
59752	NO	1493	178.82	9.6	87.54	49.61	12.512	19.163	12.774	4.38	53	369	1238	3165	29	0.548	0.86	1.768	127	2.25	50.2	1.1	94.3	688	950	265	8.35	8.18	0.966	3257	2603	88.1
59753	NO	3228	414.62	40.2	94.11	66.59	16.775	25.807	20.073	6.96	265	304	13	451	21	2.385	1.497	2.572	951	4.42	105	6.6	63.4	1339	1959	532	22.15	7.97	1.867	4854	3686	153.5
59754	NO	2904	262.38	24.4	96.51	107.98	28.488	32.084	36.921	12.72	199	449	614	2646	68	2.26	2.063	2.21	549	2.51	68.6	0.9	237.4	849	1401	335	20.23	11.08	1.369	4428	2840	134.3
59765	NO	2897	372.69	11.6	101.89	112.63	44.309	37.666	22.083	3.68	602	648	43	531	5	1.72	2.713	1.502	323	9.33	34.8	6.3	63.8	1540	1548	274	12.53	15.89	1.016	2981	2683	142.6
59768	NO	3153	303.02	2.1	166.59	110.48	67.8	31.183	5.288	2.49	2482	2490	0	242	0	1.741	8.431	2.281	293	24.19	22	48.7	12.4	5246	4336	695	1.98	22.12	0.481	2592	6683	144
59771	NO	2305	306.08	35.9	72.28	97.33	28.584	44.643	17.718	14.29	339	504	116	1907	23	1.728	4.282	2.832	445	1.37	136.7	2	260.9	761	1602	524	11.5	8.73	1.938	3173	5268	60.7
59779	NO	2531	312.1	26.4	96.04	102.02	35.417	39.658	21.217	4.6	642	705	2	750	105	1.798	2.95	1.842	284	8.68	41.9	13.7	76.9	1818	2017	382	13.61	14.04	1.268	3607	4277	112.7
59780	NO	656	67.48	10.8	28.42	30.13	10.831	12.138	4.207	3.83	157	740	15	6987	5	0.993	0.835	0.623	285	0.98	41.6	1.9	561.1	474	595	108	17.19	3.26	0.685	2168	754	48.3
59782	NO	3099	345.02	37.9	134.92	122.6	40.357	50.478	23.727	22.34	1326	2082	2788	7576	291	2.508	3.618	4.318	856	14.65	303.9	10	85.2	1415	2614	591	22.59	15.3	2.354	5937	5545	175
59788	NO	1465	279.23	8.4	47.33	18.53	5.975	7.528	3.458	7.49	104	312	25	2498	2	5.809	2.137	2.471	574	8.88	101.4	11.9	92	541	982	311	12.68	8.84	1.531	4995	1998	62.9
59792	NO	1654	196.01	14.8	93.55	57.26	25.704	17.644	9.127	7.5	848	910	34	735	64	1.61	3.37	1.747	213	10.48	52.4	16.3	40.8	1832	1839	278	12.87	14.39	0.818	2907	3341	82.8
59796	NO	1401	184.16	5.9	48.7	52.94	22.235	15.74	10.235	2.77	378	399	1	229	6	1.62	2.574	0.544	288	3.59	2.7	7.2	19.8	1103	1022	161	7.96	5.87	0.472	2246	1928	79
59800	NO	2249	344.91	15.6	79.9	62.33	21.259	18.577	17.27	7.12	665	716	41	610	1	2.722	2.354	1.997	947	5.76	304	3.8	61.5	1435	1731	244	23.43	17.54	1.1	4761	2168	126.1
59801	NO	2278	144.48	4.2	68.44	92.35	35.18	38.125	7.914	2.82	266	269	0	38	9	0.808	2.438	1.734	298	4.51	2.6	7.2	11.8	1033	1390	319	8.44	8.62	0.989	3677	2358	91.5
59802	NO	3214	392.93	17.5	141.13	121.36	47.202	40.219	20.451	8.36	258	303	4	538	2	2.007	2.583	1.857	545	8.03	26.5	0.7	57.4	1407	2227	286	22.6	25.76	1.44	6066	3109	152.8
59808	NO	1846	275.81	19.4	91.18	46.4	18.135	14.3	8.237	5.27	291	348	49	553	228	1.064	2.137	2.577	233	3.54	76.7	3.2	29.9	655	1324	338	11.45	9.77	1.254	2730	3317	72.7
59809	NO	1064	151.95	15.1	22.02	44.24	8.549	18.257	15.918	4.66	0	12	0	150	4	0.759	0.523	1.383	158	1.2	55.2	0.1	59.2	132	334	172	4.55	3.81	1.174	1797	2501	26.3
59812	NO	4246	610.87	24.5	153.94	134.96	51.708	46.402	26.614	9.88	577	619	24	405	224	2.321	2.572	2.461	632	4.07	423.7	3.4	83.2	1422	2659	426	24.8	15.1	1.949	8526	5059	203.1
59813	NO	2255	374.51	14.7	65.37	57.33	12.215	17.585	21.889	10.25	1234	1284	9	597	19	1.994	2.714	2.48	495	5.54	25	7.8	89.6	1215	1325	315	18.59	8.67	1.042	2935	2407	130.4
59830	YES	1867	230.41	11	72.64	61.85	16.862	19.574	19.726	6.89	443	475	3	363	13	1.781	1.869	1.032	436	2.39	9.4	2.7	80.7	763	1063	199	15.05	9.41	0.828	3232	1570	111.2
59831	NO	1859	185.86	18.9	67.48	82.92	24.076	30.482	20.524	4.31	414	434	30	217	12	1.776	1.81	1.267	310	3.07	47.6	4.2	26.3	707	1339	302	13.64	8.4	1.234	2955	2082	138
59835	NO	1694	227.65	13.3	65.21	58.24	16.163	20.126	14.082	6.83	320	367	0	563	3	1.517	3.112	1.142	301	2.85	7	3.1	49.9	766	1375	236	11.23	10.27	0.852	3209	2060	82.1
59864	NO	1537	199.06	21.6	67.24	54.65	14.82	20.221	12.489	5.17	415	832	1526	4172	124	1.492	1.355	2.175	347	6.86	90.2	17.4	46.8	755	1370	346	16.39	11.23	0.947	3116	2163	102.2
59865	NO	1638	190.08	11.2	53.37	71.91	22.158	31.06	13.94	6.2	124	147	43	261	1	1.24	1.392	0.985	264	2.91	22.9	0.2	36.7	646	837	242	10.64	9.56	1.11	1573	1964	106.8
59869	NO	1543	169.7	20.4	58.05	48.49	16.175	19.246	9.07	1.95	107	127	51	203	10	1.497	1.024	1.419	435	1.13	17.2	1.9	24.5	470	1054	324	10.83	5.87	1.061	3047	2685	111.5
59878	NO	3119	279.75	13.7	85.8	120.43	29.623	40.334	39.825	7.35	320	358	240	293	103	1.203	1.953	2.43	390	3.16	98.3	4.2	81.9	771	1355	358	10.31	9.88	0.933	3682	2410	108
59879	NO	1552	201.76	13.9	64.84	59.03	9.878	23.793	20.226	9.39	44	76	82	321	36	1.176	0.703	1.254	281	5.62	194	8.6	38.6	266	884	278	7.52	4.72	0.93	2832	2114	89.6
59881	NO	2623	391.86	22.5	73.31	91.79	40.581	28.368	15.137	5.7	455	510	70	584	141	1.435	1.609	2.269	345	2.94	152.7	1.2	84.8	1173	1356	286	12.06	10.35	1.435	4428	3597	72.7
59893	NO	1898	215.81	12.2	70	84.69	24.781	37.6	16.878	3.75	81	1073	4192	9792	2	1.816	1.054	1.321	358	2.65	78.8	0.3	138.2	380	747	157	12.2	7.64	0.762	4578	1439	119.2
59908	NO	2580	198.38	10.1	174.7	116.8	30.954	46.331	29.41	9.28	466	888	2	5047	5	2.909	2.859	3.247	510	5.29	30.7	7.6	447.9	859	1969	289	15.84	13	1.545	6047	2848	223.8
59914	NO	1729	227.98	13.3	64.94	62.29	21.543	21.927	13.157	5.63	330	402	14	872	11	1.213	1.732	0.872	402	2.87	28.3	2.2	76.5	886	1168	188	10.94	8.97	0.906	3364	1812	113.7
59916	NO	4290	491.24	14.8	183.12	180.57	73.072	63.864	27.659	10.89	1265	1310	32	508	48	2.493	3.69	2.161	657	7.77	33.1	7.2	52.1	1954	3180	415	26.08	16.54	1.775	7047	3581	283.5
59935	NO	1026	108.58	6.1	57.03	40.41	14.958	15.347	5.406	1.95	249	278	22	350	1	0.495	0.824	0.8	115	4.73	8.1	1.3	35.8	535	956	144	7.72	12.21	0.635	2248	1150	65.5
59937	NO	2343	260.61	7.8	84.64	57.42	19.44	26.366	5.249	3.29	54	97	52	482	8	1.28	1.677	1.604	286	5.99	238.4	0.4	26.2	378	1085	193	16.04	15.89	0.749	2903	3040	102.1
59938	NO	3247	329.6	30.4	238.05	92.32	24.544	33.048	20.891	20.67	838	924	57	974	55	1.561	3.051	3.949	443	10.88	78.6	3	53.9	1153	3856	640	18.88	21.54	2.957	10231	4212	361.4
59945	NO	2483	264.73	13.9	164.36	71.24	17.878	23.393	21.813	4.95	61	337	962	2818	11	4.125	1.687	3.214	459	6.67	22.1	2.3	99.9	743	1916	381	18.42	22.24	1.781	7792	3964	220
59950	NO	2147	302.36	21	67.67	77.53	25.209	27.026	19.309	8.38	428	526	23	1085	178	1.846	2.571	1.58	255	3.57	301.9	4.8	70.7	894	1239	298	11.56	10.16	1.122	3451	3166	89.6
59952	NO	2418	339.96	14.4	82.24	93.01	30.956	42.332	12.343	4.01	57	112	43	623	23	1.234	1.304	1.298	266	5	152.8	0.4	48	732	1164	400	16.06	17.15	2.484	1968	2584	73.2
59953	NO	2218	201.7	11.7	91.95	84.36	14.051	33.176	30.401	6.38	406	413	0	60	26	1.147	2.759	2.401	288	4.41	14.2	7.2	49.7	969	1999	309	7.94	6.35	0.84	4071	3227	109.9
59956	NO	2266	376.58	19.8	96.42	49.77	16.726	18.572	9.306	6.92	967	1295	1388	2960	568	1.724	3.222	2.318	260	8.43	73.2	16.8	27.2	1995	2128	455	13.37	14.82	2.084	2842	5044	85.2
59957	NO	1439	208.94	11.1	67.98	36.43	13.732	11.862	8.678	5.36	360	509	0	1827	0	1.842	2.384	1.551	547	5.54	227.1	4.8	23.7	771	1155	256	20.29	12.26	4.536	6931	1992	172.1
59962	NO	2647	346.89	15.4	61.21	83.25	25.63	32.617	18.927	4.78	254	312	27	663	32	0.949	1.413	2.572	201	3.02	98.2	3.1	35.4	755	1323	299	9.37	9.43	1.427	4644	2991	66.8
59964	NO	3352	436.67	31.4	87.87	76.28	30.414	27.7	12.709	4.98	175	420	773	2570	29	1.629	1.95	2.324	607	4.93	35.3	2.9	50.4	1213	1935	497	16.82	14.08	1.875	6290	3564	99.6
59966	NO	691	61.21	5.2	40.62	31.34	5.731	9.919	12.869	2.5	17	165	508	1520	6	0.65	0.62	0.548	113	0.75	13.3	0.5	79.2	254	496	108	5.12	3.74	0.574	2319	1374	48
59972	NO	2297	279.95	24	81.74	95.2	29.202	40.464	16.897	5.02	126	146	21	248	3	1.695	1.491	1.772	537	4.3	18.1	1.4	50.2	887	1408	272	20	13.87	1.378	4247	2860	96
59973	NO	2095	197.51	8.8	99.65	99.93	29.735	42.203	19.983	7	574	588	0	199	10	1.389	1.995	1.87	295	2.36	117.7	9.2	58.6	1485	1653	210	10.65	8.31	0.844	3639	1909	190.3
59979	NO	2982	355.08	30.8	110.71	132.23	44.653	48.269	26.796	18.1	423	644	35	2522	250	2.08	2.9	2.779	1048	5.86	261.3	3.9	364.6	1583	2026	498	27.74	22.76	1.872	5506	3177	146.2
59980	NO	4672	308.36	22.3	198.94	236.85	89.79	98.792	29.177	9.2	575	605	39	263	96	3.003	3.74	2.582	555	5.86	1.1	8.8	34	1708	2696	463	20.58	27.4	1.783	5924	2828	251.1
59982	NO	1570	235.41	17.3	42.76	52.53	20.436	12.23	15.617	4.9	119	143	0	214	133	1.522	2.045	0.855	293	0.67	29.9	0.3	10.1	601	1041	211	16.34	5.14	0.927	3229	2203	63.5
59985	NO	1131	105.3	7.4	74.78	45.57	12.565	18.466	10.738	3.29	625	658	6	398	0	0.759	1.217	1.622	133	2.75	17	1	59.4	157	672	127	6.69	4.42	0.571	2112	1512	87.4
59992	NO	3136	327.13	13.9	125.55	148.36	55.34	55.698	27.544	9.36	760	825	67	711	40	2.162	2.525	1.386	530	5.22	54.8	6.8	70.9	1665	2293	299	20.38	14.21	1.226	6431	2652	200.4
60002	NO	3510	576.1	24.8	78.78	100.19	44.533	35.126	11.673	4.19	604	762	2	1869	2	2.85	4.017	2.902	1821	5.89	8	6.7	110.1	1302	1749	417	29.08	26.14	1.28	3999	3357	101.8
60011	NO	1066	112.39	5.1	40.36	29.5	9.988	11.426	6.072	2.66	452	472	29	241	12	0.717	1.628	0.844	179	2.88	36.6	6	20.7	794	826	163	6.21	4.71	0.483	1077	1325	80.9
60014	NO	1917	225.11	16.4	48.01	63.7	22.743	19.652	14.613	9.6	573	836	77	3108	6	1.261	2.573	2.684	461	6.32	30.2	9.1	274.6	1104	1171	424	12.53	8.32	0.932	2512	3206	74.8
60033	NO	1820	272.9	21	104.03	36.15	10.745	15.595	5.26	4.04	3	192	528	1807	405	1.733	2.578	1.771	458	3.94	236.8	4.1	65.3	1317	1430	369	19.33	18.29	2.091	3602	4643	96.1
60034	NO	2410	266.68	10	85.16	69.66	24.301	27.637	10.649	4	93	466	80	4436	3	1.197	1.902	2.391	370	6.77	115.2	0.8	43.7	519	1024	305	12.95	17.15	0.901	2045	3518	87.3
60036	NO	3562	331.61	22	128.8	175.36	76.484	58.803	27.724	7.72	777	2001	4498	12280	312	2.421	3.281	1.778	540	5.33	55.2	12.9	173.8	2396	2565	527	17.73	18.07	1.894	5636	4160	162.5
60039	NO	3815	488.56	37	189.91	127.96	41.583	45.807	29.465	16.23	920	1269	1065	3567	163	3.22	4.799	4.894	983	12.13	194.7	9.2	130.5	1811	2926	638	58.48	26.51	2.192	7806	5297	189.5
60042	NO	4079	516.96	22.8	101.06	188.16	58.995	65.667	49.875	13.87	305	343	1	440	2	2.571	2.968	1.418	721	3.73	38.3	1.1	84.1	1293	1838	393	21.38	13.81	1.858	5372	4162	125.9
60045	NO	5642	433.64	19.9	252.05	259.96	65.991	103.056	71.345	19.23	342	359	6	188	31	2.057	3.402	5.494	533	4.14	62.4	0.4	90.2	466	2294	552	24.01	22.69	1.934	7398	5573	245.3
60047	NO	3603	400.1	14.2	142.1	123.41	49.895	44.785	14.518	6.9	650	693	26	437	94	2.584	2.95	2.405	512	10.33	159.8	14.4	37.9	2726	2647	391	21.3	22.98	1.395	6958	4062	178.9
60049	NO	3517	428.56	22.4	142.82	140.56	47.589	53.795	26.368	11.53	264	322	109	547	219	2.475	2.848	1.855	522	9.01	7.9	4.3	90.5	1783	2138	437	23.6	26.78	1.455	5684	2796	177.4
60058	NO	1855	187.12	24.7	104.67	80.23	18.626	31.057	24.244	10.86	155	429	464	3021	141	1.902	2.793	2.008	657	3.86	116.6	2.4	197	864	1640	447	17.31	14	2.363	5316	3986	110.1
60060	NO	1819	243.16	32.6	52.87	77.23	13.892	45.748	13.044	9.24	550	659	391	1080	76	1.522	2.039	2.43	516	1.54	62.3	3.6	93.4	866	1105	528	10.5	9.73	2.424	2250	3714	47.4
60061	NO	2136	340.34	21.6	64.51	59.86	16.932	32.365	5.563	4.9	871	908	50	246	355	2.461	4.317	2.127	435	6.77	159.5	13.5	20.6	1352	2116	374	12.85	12.55	1.572	4961	3988	54.5
60063	NO	1745	214.82	11.9	49.53	77.97	27.947	29.036	12.179	3.39	500	997	2195	4889	1	1.917	2.809	0.897	347	3.47	10.3	6.4	33.3	993	1780	165	12.26	5.69	0.554	3924	1843	68.5
60086	NO	2380	237.14	11.3	72.55	112.2	33.2	41.131	28.329	4.94	339	370	71	274	104	1.537	1.675	1.649	320	4	17.5	5.9	56.2	872	1266	241	11.51	8.62	0.835	3960	1918	125.5
60090	NO	1273	169.48	13.5	43.58	40.98	8.085	14.569	15.404	4.95	151	369	703	2255	23	0.366	0.966	1.089	127	1.37	115.7	1.8	91	593	833	260	7.33	5.05	0.992	2468	2122	42.8
60095	NO	2146	223.83	25.7	112.5	69.93	28.247	27.18	9.303	6.12	1258	3160	3286	21191	2	4.731	3.756	5.455	1060	12.15	247.4	10.6	1254.5	1319	2099	520	45.44	30.42	2.37	6897	5380	156.5
60098	NO	2800	291.4	25.8	115.21	134.75	56.691	51.044	12.167	6.75	165	213	48	448	226	1.671	1.548	1.491	311	6.9	120.9	1.5	50.3	955	1390	326	18.18	23.9	1.655	3926	2186	116.3
60109	NO	1756	227.09	15.5	69.25	65.3	24.322	25.68	9.104	4.85	273	321	40	523	80	1.418	2.108	1.077	397	2.83	90.9	5.7	62.7	1359	1853	236	12.72	7.22	1.073	3775	2583	81
60111	NO	1627	238.38	10.6	56	53.66	22.32	19.865	5.863	1.82	231	251	2	230	5	1.045	1.057	1.189	180	4.03	13.4	5.1	18	957	1227	173	8.81	9.74	0.601	2324	1519	63.3
60119	NO	3287	235	7.4	99.33	215.17	63.4	95.308	43.23	10.14	305	320	0	167	16	2.927	2.828	1.552	380	6.13	19.5	7.2	74.3	801	1780	227	17.81	11.23	0.854	7975	2148	198.9
60124	NO	2963	457.05	13.4	97.57	63.51	20.774	20.797	14.454	5.2	419	429	8	103	1	1.366	6.264	1.906	266	4.16	226.1	6.8	32.5	1209	1627	317	13.75	17.87	1.116	2580	3687	124.5
60125	NO	2584	332.11	28.2	88.39	106.76	30.024	38.686	28.483	9.31	419	1479	222	12546	96	1.685	2.255	2.1	415	2.18	119.3	3	167.5	685	1372	370	15.91	10.56	1.732	4400	3392	135.9
60135	NO	2905	371.23	31.4	149.07	94.08	31.867	25.721	26.779	5.29	855	920	99	673	178	3.584	4.517	5.144	694	15.93	30.4	18.9	91.3	1596	2529	553	32.34	14.58	1.484	4920	3666	305.1
60138	NO	2181	307.8	15.2	45.89	92.56	28.456	34.482	21.657	7.34	612	649	20	187	453	1.947	1.657	2.292	359	4.34	152	1.1	42.4	1005	1110	245	17.91	6.09	0.894	3238	2912	64.5
60144	NO	1936	216.07	19.5	57.62	80.55	23.966	30.971	16.723	6.99	262	717	1783	4543	34	1.237	2.056	1.476	310	3.03	66.6	1	43.4	793	1083	337	10.75	8.13	1.553	2330	2589	89.5
60148	NO	3499	471.92	58	149.7	123.44	34.359	52.547	25.26	16.29	833	937	198	1113	165	3.552	4.459	6.168	1011	9.51	287.8	6.6	182.8	1240	2189	619	32.73	21.1	2.642	5724	6581	228.7
60151	NO	866	114.56	8.9	41.71	26.94	9.211	8.942	6.399	9.07	484	497	12	158	4	2.57	3.7	3.164	703	10.54	27.1	5.5	9.2	763	816	153	29.93	25.8	0.602	1568	1628	74.4
60152	NO	3314	423.17	32.5	113.82	134.53	31.623	50.097	43.122	18.43	125	840	30	8523	15	2.988	2.681	1.852	1167	2.65	125.5	0.6	611.4	1285	1743	463	24.38	11.97	2.103	6350	3541	215.5
60155	NO	1348	163.44	12.6	57.94	55.44	24.677	16.593	9.379	3.51	680	708	40	303	5	1.583	2.253	1.751	346	5.58	7.7	5.3	19.2	939	1229	222	16.22	8.56	0.798	2502	1664	86.8
60159	NO	2100	173.82	13.2	75.27	58.84	24.44	18.857	8.919	5.47	584	633	84	516	100	1.872	2.777	2.848	428	9.64	36	7.6	62.1	1188	1344	248	17.81	13.66	0.907	3281	2859	75.1
60167	NO	4256	679.73	30.7	134.79	117.2	52.158	42.365	11.782	7.96	651	692	44	499	10	3.215	3.594	3.764	1901	8.73	18.5	11	36.8	2586	2757	420	35.1	33.53	1.377	8094	3655	148.4
60170	NO	2713	281.65	19.4	108.84	109.17	30.214	44.89	24.263	11.83	575	817	162	2708	256	1.966	2.476	2.671	386	6.86	83.7	34.4	125.7	1072	2361	445	19.83	11.37	1.832	4912	3859	207.2
60173	NO	3036	336.91	18.4	147.66	123.56	43.838	44.819	23.033	8.63	484	506	0	272	18	1.487	2.108	2.135	451	8.13	7.1	4.7	45.6	1003	2286	291	19.81	22.67	1.045	4213	2202	224.3
60181	NO	2653	269.27	16.9	106.75	132.84	43.469	48.347	30.344	10.84	460	528	37	824	23	1.118	2.155	2.716	177	2.62	282.8	2.8	148.5	1409	1614	314	13.16	12.62	1.775	2952	3981	113.1
60183	NO	1396	178.5	39.3	99.2	23.47	9.729	5.647	4.817	11.72	356	2570	7	26533	49	1.525	2.86	1.865	1282	7.83	120.6	11.3	1702.4	1080	1516	391	17.14	10.78	4.494	2230	5183	235.2
60187	NO	899	100.95	8.8	42.04	37.88	10.439	15.963	7.333	2.21	23	32	1	106	24	0.747	0.768	0.875	108	1.38	26.5	0.6	33.1	362	561	149	5.53	4.35	0.688	1700	1213	58.6
60194	NO	2625	393.6	29.4	76.21	87.31	45.229	27.569	6.298	7.24	372	541	75	1782	469	0.832	1.295	1.295	265	4.43	19.4	1.5	46.8	490	1099	284	18.17	13.44	1.324	4725	2973	79
60195	NO	2516	387.13	26	101.45	64.37	19.244	25.157	15.203	6.32	430	522	141	1008	48	2.759	2.072	1.719	539	3.68	83.4	5.1	62.5	1538	1925	337	21.47	11.68	1.44	5074	3455	158.8
60201	NO	1911	256.68	10.9	79.11	62.61	20.637	21.346	14.105	3.18	620	1139	961	5758	2	1.935	2.773	1.072	468	4.91	61.6	10.3	216.6	1732	1456	230	24.33	7.9	0.778	3445	2371	132
60215	NO	1478	142.65	9	70.63	69.2	22.562	27.507	14.105	6.58	655	680	1	309	19	0.678	2.405	1.079	181	2.85	6.4	5.1	40.7	637	1152	207	9.28	7.48	0.812	3417	2416	105.5
60219	NO	1442	126.21	3.4	52.32	36.95	13.755	12.051	5.935	1.44	79	85	0	71	0	1.166	1.801	1.164	415	2.95	2.6	0.6	18.7	541	896	251	6.97	6.16	0.693	2730	2414	74.2
60220	NO	2346	191.2	13	129.37	118.4	32.539	47.913	30.316	11.02	371	490	298	1256	35	1.808	2.298	1.856	476	1.98	31.1	2.5	143.7	750	1579	315	17.47	10.09	1.12	5714	1910	184.7
60226	NO	1842	222.16	7.1	58.86	49.72	11.981	21.126	12.117	3.56	98	111	17	90	127	0.527	0.836	1.433	149	0.9	13.9	0.5	12.9	148	657	170	4.78	4.69	0.405	1979	1331	64.5
60229	NO	3495	328.96	48.1	167.87	181.45	34.826	83.056	52.171	23.9	886	1007	424	1236	26	2.096	3.028	2.788	539	3.41	10.2	2.7	11	1219	3333	883	20.05	26.03	3.195	6754	5178	121.9
60238	NO	1358	184.92	17.8	66.09	40.47	8.711	16.851	11.963	6.41	486	626	427	1364	224	1.245	1.831	1.139	259	4.49	113.3	7.3	88.6	1001	1240	326	10.82	11	0.979	2572	2930	111.3
60242	NO	2260	239.71	14.4	71.44	117.97	41.595	49.649	18.112	9.43	197	230	23	352	55	1.503	1.86	1.009	332	2.14	67.6	0.9	45.6	659	1341	249	13.31	9.09	1.343	3849	2447	107
60256	NO	1444	179.94	6.4	61.61	53.39	14.976	18.272	13.644	5.03	301	325	51	182	165	1.261	1.43	1.48	244	2.14	221.8	4.7	20.1	808	958	222	7.6	6.83	0.967	2447	2396	109.4
60264	NO	2229	227.33	28.6	127.29	95.81	33.855	33.883	20.862	9.66	530	709	35	2155	8	4.524	3.023	3.664	888	5.24	65.5	7.5	213.3	1117	1949	433	23.37	16.12	1.911	3784	4373	167.2
60269	NO	1198	97.68	7.5	69.94	59.26	16.626	20.857	16.4	4.13	116	251	270	1489	4	0.716	1.097	1.143	219	1.3	69.3	0.5	166.3	479	1014	137	8.07	6.98	0.57	2538	1648	82
60270	NO	1229	186.64	11.8	60.05	26.87	5.227	7.815	11.709	1.99	4	72	235	703	6	1.51	1.145	1.175	583	0.46	7.3	0.2	71.9	250	823	373	14.32	6.96	2.26	2918	2513	66.6
60300	NO	3689	440.69	30.1	248.65	105.11	31.124	36.817	24.27	22.68	842	904	0	754	0	3.238	5.4	4.188	962	49.69	80.4	9.7	156.9	2226	3853	754	74.12	203.01	16.229	13964	6810	408.1
60301	NO	1681	227.35	8.3	51.56	54.53	21.905	19.124	8.562	3.34	274	308	50	375	18	1.163	1.138	0.905	212	1.86	110.3	0.9	21.7	957	984	164	7.81	5.81	0.877	3078	1666	79.3
60306	NO	2118	253.91	13	114.94	64.61	21.365	18.893	18.734	5.65	379	596	7	2577	26	1.193	2.022	2.181	365	3.45	25.7	3.5	175	915	1608	302	11.43	11.62	1.038	3385	3135	147.7
60308	NO	1613	199.02	19.4	61.72	67.65	28.325	22.445	11.837	8.07	734	984	445	2644	265	1.731	2.057	1.733	514	3.75	98.1	5	42.6	590	1010	251	22.77	12.46	1.71	2939	2656	101.5
60316	NO	2167	327.37	15.8	55.31	72.21	22.391	31.9	12.837	9.57	245	310	0	776	0	1.875	1.701	1.018	343	2.89	133.8	4.1	57.4	755	1150	217	14.42	7.29	0.865	3102	2430	99.1
60323	NO	1625	221.57	20.2	48.14	65.28	16.21	27.443	17.178	6.88	65	97	21	301	173	1.307	1.331	1.122	322	1.55	89.6	0.8	45.1	399	869	241	10.47	7.81	0.958	2493	1959	69.3
60324	NO	1793	203.22	15.8	97.2	66.1	24.576	22.091	12.304	7.82	137	216	2	939	0	1.772	1.662	2.342	388	1.32	108.4	0.9	346	520	1127	244	11.68	7.9	0.842	4114	2729	166.9
60331	NO	2899	476.52	38.3	109.09	73.05	20.748	18.268	25.88	29.17	469	829	367	3913	459	3.535	4.535	5.907	1006	15.48	505.6	17.9	149.4	3360	2006	559	40.34	30.83	2.084	3634	5819	214.2
60332	NO	1365	146.99	12	95.55	44.45	17.488	16.822	5.754	4.04	621	638	2	176	5	1.649	2.713	1.65	308	8.48	179.1	8.4	24.8	1654	1547	333	10.27	13.19	1.146	3698	2690	164.9
60334	NO	3805	453.55	14.7	115.15	130.58	46.235	57.328	17.112	6.18	182	206	8	278	5	2.368	2.692	1.974	553	5.62	29.7	11.4	52.5	1001	2110	326	19.73	16.71	1.665	2638	2783	169.2
60345	NO	1288	205.8	6.8	33.36	42.77	12.482	15.706	10.133	3.99	1233	1257	2	282	0	0.781	2.441	2.133	190	2.35	502.9	0.5	68	498	524	146	11.29	10.69	1.155	2364	1308	49.9
60347	NO	4015	407.42	24.1	118.37	130.28	50.769	45.498	23.735	13.48	1272	1437	259	1696	345	2.133	3.157	2.745	725	6.22	199.4	7.3	78.5	1748	2345	473	24.76	17.61	1.817	6349	4327	163.5
60351	NO	1821	231.03	24.7	65.54	74.31	17.98	25.107	23.207	8.81	950	1208	744	2695	68	1.927	2.512	2.762	562	7.07	77.6	5.6	105.5	1111	1442	332	24.18	12.03	1.109	3157	2464	99.8
60360	NO	1051	103.92	3.4	20.45	7.99	3.024	2.965	1.015	1.25	35	81	0	560	0	0.475	0.853	1.015	266	0.66	34.5	0.2	84	280	497	159	2.65	1.77	0.29	583	830	42.8
60364	NO	980	137.81	19.7	60.62	25.33	10.974	7.941	3.724	2.26	477	868	1507	3874	152	1.187	2.114	2.296	382	4.52	109.7	4.2	75.5	816	1053	284	12.97	8.14	0.869	1699	2363	66.7
60368	NO	2507	301.14	23.1	114.75	96.76	23.201	36.671	28.648	9.76	214	456	559	2411	449	2.396	2.152	2.71	693	7.17	263.1	10.7	141.8	469	1287	411	14.91	9.72	1.711	5865	4665	176.7
60370	NO	3219	366.4	31.5	148.02	130.94	42.761	48.19	28.571	13.1	710	953	494	2566	182	2.448	3.383	3.209	811	4.57	284.8	13.6	208.7	2516	2317	449	21.65	15.25	2.039	5118	5326	173.6
60373	NO	2668	302.59	38	131.88	107.96	42.823	34.95	18.83	7.93	568	652	25	976	69	1.572	1.948	1.989	561	6.95	341.4	7	87.5	1408	2258	474	22.58	23.41	2.395	4937	4398	132.2
60376	NO	2333	213.63	12.6	64.68	131.57	46.105	45.066	29.503	7.77	422	702	1018	2751	172	1.121	1.609	1.383	380	4.26	134.5	5.4	132.3	1124	1239	239	11.08	10.98	1.112	4244	3113	87.9
60377	NO	2763	379.11	25.5	116.98	95.06	27.892	32.174	26.773	9.3	498	718	457	2369	136	2.676	3.827	2.699	514	6.73	143.9	10.7	311.4	2126	1927	592	15.96	16.82	2.392	6033	5182	168
60390	NO	1400	115.03	21.9	93.52	64.4	28.536	20.969	9.557	3.4	343	783	1721	4420	3	0.609	1.044	1.676	147	1.31	48.6	0.6	75.4	1061	1423	293	7.85	10.41	0.969	2241	2058	69.1
60400	YES	1396	181.61	6.4	43.06	56.23	14.347	22.496	14.878	3.17	147	177	134	264	48	0.692	0.845	0.914	159	1.16	23	1.3	68.3	408	450	109	8.3	3.45	0.622	2329	1057	44.8
60408	NO	1485	175.13	6.3	55.13	62.81	21.297	20.928	15.495	3.8	170	187	19	177	51	1.28	1.137	0.69	276	3.41	4.1	3.4	41.1	727	848	138	9.71	6.89	0.753	2750	1034	107.6
60410	NO	2097	238.46	12.2	48.62	109.8	40.093	36.272	24.492	8.75	627	717	122	1002	60	1.668	1.912	2.728	349	5.96	73.4	5.2	115.5	826	919	176	15.39	5.74	0.914	3555	2370	62
60429	NO	3799	342.77	23.1	148.64	96.34	24.289	38.236	22.63	10.64	205	287	143	834	141	2.033	2.923	5.185	562	6.51	135.2	4.7	115.6	830	2165	588	34.01	20.96	1.468	3931	5103	180.2
60454	NO	2733	411.82	15.3	83.35	82.22	29.681	26.305	19.671	14.57	842	939	5	1106	15	2.903	3.137	2.831	277	6.01	466.3	8.1	198.8	952	1535	294	14.39	10.69	1.363	7572	5283	123.5
60456	NO	3952	457.26	15.6	128.99	181.94	74.299	61.602	29.887	9.65	431	472	0	477	1	2.731	1.992	1.328	712	6.71	16.8	1	77.5	1721	2148	239	23.17	19.63	1.098	5780	2303	177.2
60457	NO	2144	294.43	37.5	106.96	66.96	22.227	30.669	7.858	6.82	1091	1188	272	591	956	2.485	3.408	3.138	1002	9.86	85.1	10.7	40.4	1676	2231	442	38.85	17.11	1.573	4329	4224	116.5
60461	NO	2126	219.67	12.3	68.46	98.81	36.117	31.8	21.733	6.58	440	472	3	381	2	1.101	2.334	0.979	276	4.3	6.7	1.2	81	875	1222	236	11.15	12.73	1.066	3077	1568	93
60477	NO	1409	127.16	15.5	78.39	66.16	21.901	29.215	9.879	4.89	257	284	34	290	53	0.61	1.331	1.383	240	3.39	26.7	2.2	38.5	489	1057	193	9.28	11.41	0.792	2107	2136	87.5
60479	YES	1224	186.45	29.5	53.3	34.61	8.661	10.21	12.033	4.42	374	761	1465	3892	39	6.115	1.475	2.56	699	8.09	63.1	2	120.9	582	896	294	31.78	7.98	1.512	2216	2178	78.5
60489	NO	2336	192.82	23	106.15	127.76	61.813	39.443	18.143	9.4	653	4488	15772	38125	0	1.712	3.606	1.333	557	4.29	35.8	0.9	108.5	2664	3308	345	11.54	19.66	1.114	8952	4135	135.4
60501	NO	2104	227.73	23.6	93.34	94.47	15.654	35.811	34.871	16.19	268	336	43	778	29	1.035	1.961	1.208	220	16.53	88.8	12	55.9	1390	1976	427	17.46	11.5	1.868	3641	3054	170.2
60502	NO	1227	139.8	11	59.77	29.4	11.711	11.937	2.317	1.15	0	10	2	101	0	0.238	0.804	1.362	120	5.24	4.7	0.4	4.9	143	831	196	10.67	16.89	0.894	2535	1885	39.4
60507	YES	920	83.3	13.1	64.56	36.2	9.273	12.746	10.818	2.85	166	440	974	2781	24	2.339	1.188	0.899	180	3.44	28.8	3.6	116.4	589	1012	197	7.33	6.63	0.92	3219	2075	54.6
60513	NO	1872	224.28	15.8	57.93	87.79	22.843	33.136	24.861	10.22	369	493	66	1408	116	1.046	2.187	1.585	236	3.08	65.7	5.5	91.6	861	1161	229	9.07	7.41	1.332	4265	3499	94.4
60516	NO	3420	274.08	8.6	89.71	33.87	8.647	13.162	8.621	1.9	76	91	15	143	72	2.165	2.948	2.928	522	1.88	58.2	1.3	16.2	607	1470	445	10.29	6.57	0.801	3743	3631	126.9
60517	NO	2158	247.54	18.5	72.8	68.11	22.655	23.118	15.55	7.16	385	612	412	2510	78	1.147	1.895	2.635	284	2.22	156.2	4.6	88.9	796	1209	336	9.8	6.76	1.333	3340	3680	103.2
60519	NO	1869	262.25	15.3	101.18	38.45	11.634	14.157	7.682	4.15	44	207	450	1659	97	1.687	1.367	2.482	539	6.03	50.5	1.1	77	495	1203	312	16.79	16.48	1.461	4296	3079	120.5
60520	NO	3073	323.15	13.7	94.43	119.11	35.075	44.174	30.225	7.28	725	756	5	363	13	1.237	3.007	1.843	331	4.38	149.5	8.3	288.1	1120	1720	331	12.9	11.07	0.834	4539	2665	127.8
60525	NO	3457	338.85	29.8	163.38	166.66	45.443	69.42	41.227	13.48	682	1552	1286	9827	27	2.702	4.714	3.243	702	9.16	174.4	16.2	302.1	2237	2730	535	21.9	22.48	2.766	6968	6431	225.1
60535	NO	4426	475.56	31.1	160.02	206.99	64.416	77.54	47.277	18.16	1238	2602	348	16101	177	3.008	4.803	3.172	962	6.22	205.6	11.4	1553.5	2110	2902	521	28.94	18.1	3.014	6810	5199	262.5
60545	NO	2933	355.19	26	173.06	98.05	36.085	33.638	16.876	10.88	820	1131	65	3620	250	2.225	3.713	3.864	726	12.47	234.6	29	179.8	1242	2591	448	22.45	23.07	1.804	4809	5375	232.5
60556	NO	3352	425.62	29	129.21	128.35	54.377	34.472	28.085	14.26	744	829	38	965	94	2.998	2.825	1.747	782	5.11	175.9	3.4	68.3	2442	2574	431	22.88	17.99	1.846	6705	3494	221.5
60557	NO	1393	143.29	5	73.19	56.92	17.331	18.264	16.266	3.9	327	348	40	228	1	1.23	1.338	1.197	263	2.5	6.2	2.6	30.8	620	991	140	8.5	6.55	0.501	3874	1519	107.2
60558	NO	1481	153.13	9.6	49.19	75.54	21.835	31.7	15.766	8.28	418	455	14	431	98	1.165	2.001	0.915	235	2.73	51.6	3.2	51.8	305	774	169	8.77	7.16	0.76	2376	1615	71.8
60562	NO	1384	227.01	12.8	33.11	41.63	13.602	13.143	10.239	7.06	154	1398	5062	12409	0	0.648	0.902	1.988	166	3.5	178.2	0.6	65.7	503	586	172	13.8	7.38	0.824	2926	2322	31.4
60583	NO	1999	249.28	5.9	59.54	85.58	36.41	28.901	12.828	10.64	661	674	22	122	73	1.391	1.706	1.293	363	4.71	107.2	5.4	136.8	1206	1131	280	13.78	12.31	1.29	2233	2076	58.9
60584	NO	2798	173.81	8	114.69	175.94	42.894	56.479	61.777	10.56	205	419	45	2484	91	2.853	1.459	1.574	336	4.86	10.7	1.6	327.3	765	1239	213	16.29	14.06	0.734	4130	1701	122.7
60586	NO	1685	226.38	18.2	72.28	57.01	15.439	17.737	19.322	2.47	506	647	521	1432	12	1.434	2.088	2.113	297	3.62	25.1	4.2	66.5	779	1313	382	13	11.59	1.513	3578	2695	100.9
60587	NO	1922	320.89	20.1	79.25	41.75	14.366	12.61	7.587	1.64	614	619	35	64	2	2.006	2.556	1.995	603	5.14	21.4	8.5	7.2	1218	1487	350	21.55	13.43	1.098	1912	2287	120
60590	NO	2331	292.07	16.2	101.42	85.88	40.692	25.868	10.335	2.95	1065	1100	14	306	40	2.307	4.59	4.04	459	9.84	72.8	13.2	25.2	1502	1695	314	22.11	9.09	0.913	2840	4667	95.8
60598	NO	2400	320.01	26.9	92.36	92.68	40.648	28.923	15.031	6.84	891	1839	88	11314	18	1.703	2.36	2.801	550	2.4	528.6	6.1	56.3	1086	1539	374	23.21	10.07	1.621	3189	4195	138.4
60601	NO	2785	341.08	30.7	149.71	94.26	31.624	36.689	18.02	7.77	494	736	460	2636	56	1.959	2.917	2.649	477	3.89	70.6	7.8	90.3	1346	2237	347	19.99	15.99	1.685	8208	4360	139.1
60619	NO	3136	226	9.3	167.29	173.86	69.006	62.627	16.943	4.54	104	128	21	272	17	2.359	1.914	1.864	382	15.92	89.7	3.5	32.9	1019	1796	223	22.87	30.04	1.016	4200	2893	181.5
60628	NO	2454	212.04	22.9	105.8	137.23	31.691	46.412	46.191	14.81	417	1029	2088	6136	342	2.041	2.674	2.465	446	3.25	193.3	6.8	198.5	975	1955	350	13.58	12.5	1.684	6959	4421	139.6
60638	NO	2445	231.82	8.2	115.56	118.2	43.193	44.408	19.117	8.05	528	551	24	222	85	1.126	2.365	1.804	306	8.25	89.5	10.2	33.5	2039	2114	245	15.49	19.78	0.894	4038	2605	139.4
60639	NO	2477	273.32	21.9	78.91	106.96	32.39	42.484	22.187	10.39	170	346	295	1897	164	1.349	1.847	1.355	186	3.31	33.9	3.2	102.7	957	1624	305	12.02	10.3	1.206	6007	3110	109.6
60640	NO	1987	224.67	14.3	88.57	82.71	20.847	25.918	28.513	9.56	452	489	49	372	105	3.279	2.292	3.039	454	4.8	74.1	3.8	78.5	515	1070	207	19.33	10.21	1.122	4021	2197	168.1
60650	NO	1175	189.44	12.6	45.2	28.05	10.134	8.356	7.392	4.84	344	379	7	392	97	1.227	1.48	1.241	196	3.66	20.9	4.2	30.9	912	957	207	7.31	5.02	1.055	2210	2160	69
60655	NO	2597	372.56	27.2	103.07	70.27	22.297	23.654	18.239	6.39	350	412	27	658	141	2.501	2.735	2.107	551	2.77	82.1	3.8	59.9	983	1614	411	18.46	12.63	1.875	4752	3753	177.3
60658	NO	1521	127.51	5.6	72.78	47.5	17.011	16.769	7.668	2.76	341	400	13	712	0	1.038	2.376	1.782	192	5.52	50.7	6.3	48.7	1054	1344	246	6.97	10.33	1.002	2362	2681	76.7
60677	NO	3416	477.21	52.2	139.2	73.92	17.36	26.263	23.459	10.54	403	1063	2374	6564	352	2.61	2.775	4.074	878	3.45	243.3	7.1	172.1	1484	2274	713	27.23	16.45	2.968	4090	6926	150
60680	NO	2516	384.44	28.6	79.11	80.04	22.925	29.638	20.155	7.96	304	591	1093	2833	152	1.715	1.997	2.684	471	6.84	272	10	61.5	1184	1551	357	12.42	11.32	1.339	2673	4811	96.4
60681	NO	2999	374.81	20.7	164.67	82.18	37.972	26.005	9.679	9.69	908	1262	139	4212	1	2.148	3.339	2.424	585	9.41	1.6	15.1	39.9	1735	2511	546	19.96	17.41	1.791	6625	5104	355
60694	NO	2737	428.88	50.9	71.4	88.05	30.359	28.043	21.992	6.56	958	1488	2349	5200	1	3.285	2.909	3.095	573	2.58	175.2	4.9	108.2	1107	1787	730	27.34	11.96	2.442	3140	5312	84.3
60696	NO	2460	294.56	13.3	88.16	91.87	29.902	36.974	15.725	10.55	322	892	1011	6353	26	1.838	1.875	1.674	483	6.46	258.8	3.6	66.4	601	1271	218	18.46	13.09	1.096	5195	2712	136.7
60713	NO	951	59.81	4.7	37.79	63.11	14.696	18.432	21.114	6.85	178	257	112	863	100	0.513	0.631	0.476	125	3.1	17.5	2.1	145.7	313	598	94	5.4	3.64	0.352	2540	1077	56.1
60719	NO	1615	229.62	21.6	97.62	32.81	11.085	11.208	6.792	3.63	220	1872	2235	18713	20	1.37	1.916	1.556	426	2.21	85.8	4.1	1451.4	717	1121	311	13.74	12.48	1.391	5093	2516	95.1
60721	NO	1716	116.11	11.4	57.55	71.12	28.576	25.757	11.594	5.26	293	408	186	1270	7	0.89	1.312	0.887	179	3.14	35.6	2.2	54.3	1178	1222	193	8.18	9.66	0.986	2749	1559	41.9
60734	NO	1445	131.13	9.9	70.6	71.9	27.068	25.161	12.744	3.95	345	711	100	4336	46	0.987	2.101	1.149	274	6.27	33.8	5.8	404.3	1005	1026	176	9.65	13.13	0.568	1916	2188	67.8
60735	NO	1799	212.11	18.3	54.78	87.1	28.942	26.335	24.925	8.87	473	693	308	2480	33	2.457	2.35	1.686	500	4.33	54.6	2.6	176	1050	1087	246	14.89	7.21	1.043	3127	2671	81.5
60737	NO	1179	179.81	11.8	38.5	35.59	15.964	11.165	5.647	10.29	701	727	34	307	0	1.357	1.315	1.979	292	3.76	44	6	29.8	872	946	279	15.11	10.66	1.529	1759	2037	38.4
60754	YES	1644	225.09	7.7	37.73	68.25	31.153	22.426	4.411	1.6	565	576	48	108	2	2.074	2.423	2.457	367	6.84	26	3.4	8.8	292	542	117	17.46	4.46	0.372	2144	1448	64.9
60758	NO	2842	308.31	31.9	155.7	104.26	41.197	32.697	16.638	6.72	362	560	294	2195	152	1.605	3.111	3.37	339	12.86	114.9	5.5	135.2	1337	2529	476	22.73	29.04	2.297	7101	4460	148.6
60759	YES	2257	264.99	15.2	81.45	100.14	31.799	35.63	25.221	9.37	726	778	20	593	6	1.977	3.131	2.108	565	7.8	70.6	17	71.1	1201	1814	324	18.07	13.29	1.166	3793	3885	150.5
60760	NO	2265	254.33	19.3	84.46	81.63	29.917	28.517	12.791	5.67	684	688	0	77	1	2.219	2.892	3.244	549	9.06	58.4	6.9	38.9	1226	1482	366	23.97	19.6	1.356	3303	3894	97.4
60763	NO	2309	260.8	7.5	119.39	85.05	31.5	34.694	10.407	4.17	87	145	16	629	123	1.356	1.225	1.798	340	8.85	5.2	1.2	13.5	463	1225	209	19.96	24.15	1.217	4573	1789	112.6
60765	NO	2082	227.91	28.6	98.61	88.69	31.181	29.502	19.426	4.58	460	466	1	63	11	2.677	2.67	1.681	202	3.51	3	4	56.4	726	1784	293	14.01	12.38	0.957	4003	1802	180.6
60775	NO	946	131.4	11.7	28.14	38	19.622	10.524	4.167	1.68	389	402	0	155	20	0.628	1.146	0.853	220	2.66	47.8	5	76.5	557	661	161	3.6	3.44	0.551	2099	2133	27.5
60785	NO	1513	198.93	10.1	89.15	37.36	12.428	11.329	9.451	1.92	109	115	0	83	3	1.416	1.301	1.651	334	0.94	4.4	0.4	20.7	275	874	203	10.77	8.16	0.714	3327	1789	106.2
60788	NO	806	139.55	5.1	33.13	13.78	4.122	4.59	3.262	1.79	53	376	1304	3227	0	0.614	0.893	0.467	213	0.32	24.2	0.4	60.7	96	367	116	4.57	3.68	0.462	1623	1010	55
60799	NO	3231	468.97	27.7	93.68	117.52	31.021	47.112	31.069	16.45	788	861	28	802	128	2.813	3.364	3.415	933	8.5	68.2	7.4	50.1	1288	1555	420	27.05	20.93	1.619	4600	2867	157.2
60802	NO	2683	426.26	7.2	84	70.74	19.072	26.05	18.238	9.61	252	290	42	449	8	1.303	3.448	0.893	340	5.76	24.6	2.3	48.6	683	1467	336	12.34	10.45	2.268	5381	3524	184.2
60803	NO	2537	250.57	16.1	102.93	89.12	30.094	31.346	18.423	10.48	652	704	26	606	27	1.89	2.176	3.551	394	7.96	27.7	20.1	53.2	753	1748	396	15.34	7.39	1.284	4643	3293	149.6
60804	NO	787	144.52	7.4	26.34	10.46	2.476	3.391	3.245	1.21	68	85	1	198	6	0.973	0.643	0.466	288	0.32	12.7	0.9	10.5	165	383	150	6.95	3.32	0.575	1479	412	98.7
60827	NO	987	125.28	12.8	45.31	34.29	11.123	14.872	4.824	2.36	1	269	1098	2680	11	0.813	0.758	0.898	144	2.86	21.5	0	45.6	293	639	186	15.35	9.61	1.075	2640	1981	60.7
60829	NO	2113	300.46	18.8	111.46	52.54	19.732	15.911	11.436	5.18	596	799	20	2138	658	2.075	1.446	2.156	424	4.67	150.2	4.3	15.7	1002	1681	366	14.54	8.6	2.004	3578	3424	161.5
60833	NO	1874	283.89	12	57.43	59.9	13.329	24.675	16.861	4.48	86	100	43	104	101	1.117	1.131	1.372	227	0.58	21.4	0.4	19.1	361	640	175	8.59	5.25	0.621	2414	1616	71
60866	NO	3092	368.08	28.5	80.7	150.31	41.693	65.141	34.283	14.16	124	307	674	1824	64	2.507	3.238	1.518	645	2.16	149.5	2.3	147.7	735	1812	429	18.84	8.53	1.875	4583	3861	114
60867	NO	2001	198.67	13.4	93.64	76.5	23.862	27.324	18.247	8.79	527	1076	645	6255	24	1.412	2.458	2.1	535	4.74	180.4	6.6	310.5	1045	1594	405	15.5	13.08	1.687	7471	3647	138.2
60870	NO	3091	369.1	17.3	143.16	114.99	58.744	33.484	14.775	4.77	786	834	6	530	23	2.502	2.825	2.276	588	7.97	29.7	7.7	54.3	3056	2435	331	18.8	18.87	1.343	5828	3132	160.3
60871	NO	2751	277.23	22	98.85	112.84	36.183	41.906	26.565	11.92	242	440	265	2094	340	1.202	1.801	1.763	317	6.08	78	1	125.4	776	1294	316	16.29	20.59	1.737	2934	3437	101.4
60877	NO	706	135.45	7.7	21.97	9.98	2.479	3.913	2.603	6.31	33	838	1144	9100	1	0.601	0.657	0.876	208	0.12	110.3	0.2	352.7	197	288	141	6.7	2.4	0.677	931	1412	27.2
60896	NO	3019	409.61	27.7	95.17	121.11	30.597	55.33	26.398	11.9	317	342	40	297	29	1.33	2.224	2.019	308	2.17	118	3.3	55.7	830	1646	504	21.45	22.72	2.063	3681	3963	174
60901	NO	2811	281.26	26.3	71.9	108.25	34.514	26.718	39.438	7.12	206	623	142	4925	21	1.783	1.944	1.981	582	1.85	60.3	3.8	300.4	1712	1740	521	17.35	9.84	2.618	3327	2720	105
60903	NO	592	52.76	1.7	51.99	18.57	6.731	7.24	1.422	1.63	10	23	4	151	0	0.292	0.694	1.18	29	3.14	4.1	0.2	22.2	69	463	78	4.43	9.76	0.415	802	1203	59.4
60905	NO	2697	260.03	6	102.86	84.89	31.838	33.294	11.544	4.24	280	333	93	568	35	1.271	1.627	4.337	338	29.31	17.1	2.8	53.9	1235	1428	320	14.28	19.01	0.971	3605	2308	122
60906	NO	2504	376.61	22	62.76	91.63	26.525	35.578	23.3	9.68	559	570	18	97	4	1.916	2.689	2.339	415	5.18	11.3	3.4	25.5	865	1349	332	17.4	8.92	1.2	3072	2557	84.8
60908	NO	852	61.28	5.3	53.95	41.79	8.573	14.649	15.736	8.37	241	458	728	2245	0	0.908	1.919	1.627	172	3.96	11.6	0.7	152.2	270	601	158	6.99	4.74	0.82	2412	1853	64.3
60909	NO	3223	510.28	14.9	74.91	91.3	34.086	39.131	11.766	4.04	863	882	6	241	6	2.402	3.666	2.334	445	5.09	8.7	6.5	44.6	1281	1307	303	21.45	14.23	1.013	2720	2620	117.6
60916	NO	1487	207.41	14.9	76.32	41.42	14.936	14.284	6.075	9.91	810	851	0	480	3	2.055	3.44	2.119	451	9.19	68.5	5.7	35.5	1040	1414	246	23.67	12.45	1.162	2349	2348	117
60918	YES	1916	247.98	17.5	73.3	74.85	25.541	23.701	20.707	7.47	530	605	56	817	74	1.762	2.779	3.023	434	5.73	140.6	4.7	132.6	943	1153	241	18.67	6.58	0.903	2384	3076	72.6
60933	NO	3311	355.86	22.2	137.71	150.53	40.37	64.379	33.821	13.45	969	1027	142	647	83	2.403	4.281	2.547	732	7.76	82.4	17.3	142.1	2130	2552	401	18.24	13	1.395	4090	4353	215.5
60934	NO	4105	340.58	29.4	175.83	228.36	65.944	73.767	69.445	17.78	575	657	125	844	179	1.864	3.977	3.36	455	11.01	21.6	4.5	278.8	1661	2908	547	24.11	33	1.806	6959	4771	208.1
60946	NO	2161	300.84	19.8	79.99	72.11	20.393	26.479	20.615	7.93	260	306	265	424	0	1.755	1.08	0.871	496	1.47	8.9	2	58.6	1139	1126	272	19.92	10.06	1.253	3440	2562	98.5
60948	NO	2547	228.62	15.9	113.19	134.95	37.314	53.615	34.911	11.11	279	344	1	722	165	1.469	2.019	2.016	357	3.02	61	5.5	59.7	670	1669	269	14.31	14.44	1.389	3532	3364	147.4
60950	NO	2988	372.95	16.6	100.15	126.18	53.533	41.047	19.121	6.46	890	1274	1553	3731	87	2.523	4.009	2.755	396	9.63	29.6	18.4	66	1983	2128	336	20.67	11.51	1.342	4163	3970	122.8
60953	NO	2741	326.8	26.2	139.77	101.35	33.733	36.967	20.134	5.21	266	305	46	363	231	1.921	1.686	2.842	422	3.26	142.4	3.3	22.6	1053	1623	405	23.93	26.85	1.573	5149	3054	162.4
60958	NO	1728	244.25	16.8	70.87	53.61	22.321	16.431	9.533	3.12	2212	2223	0	95	8	2.877	4.302	2.725	622	4.6	0.7	14.4	12.7	2003	1757	338	32.04	10.31	0.947	2128	2366	130
60969	NO	1021	170.03	23.9	56.28	16.89	7.712	5.175	2.139	3.13	98	366	873	2509	548	1.541	1.041	1.553	298	1.01	342.3	4.1	70.8	1347	857	283	6.86	5.26	1.133	1764	3051	78.1
60971	NO	2916	236.47	22.8	142.47	93.7	19.197	43.25	22.527	17.41	154	576	1471	4311	34	1.337	2.274	3.545	423	7.1	74	2.1	148	716	1914	572	14.97	22.45	2.139	4819	3711	179.7
60972	NO	3036	143.29	6.2	170.6	151.17	55.063	57.53	23.872	5.61	509	515	0	76	10	1.164	2.353	2.706	315	8.6	2.7	3.5	32.3	1100	1890	296	16.77	24.02	0.921	3971	2040	198.2
60975	NO	1607	195.78	17.1	47.81	72.96	31.566	27.387	10.051	6.71	372	581	732	2126	63	1.15	1.263	0.718	277	0.82	100.7	0.4	89.4	804	1115	248	10.57	5.92	1.243	2951	2814	55.3
60976	NO	2553	306.93	23.4	156.16	79.03	21.176	29.959	18.141	9.89	401	754	59	4149	245	1.578	2.601	2.971	472	17.57	63.2	10.2	302.4	1169	2588	549	13.56	13.34	1.533	7852	5008	134
60982	NO	4302	523.68	16	121.67	193.97	84.367	65.715	29.25	12.47	1020	1082	25	638	155	2.484	3.335	1.75	495	6.66	114.3	13.1	102.2	2241	2192	391	22.97	13.42	1.569	5179	3648	205.1
60986	NO	1638	229.4	14.6	63.35	52.69	16.917	19.688	11.001	6.17	231	257	67	169	226	1.384	1.345	1.272	454	2.5	281.3	11.6	33.3	2725	1305	294	12.94	9.81	1.195	2021	2954	79
60989	NO	1608	194.03	7.6	57.15	67.78	24.746	27.348	10.3	5.79	381	433	5	612	7	1.08	1.494	1.035	250	4.45	20.9	5.8	36.4	995	1041	180	10.6	7.85	0.844	3805	2108	63.4
60991	NO	1435	227.69	7.6	35.6	44.49	16.064	16.791	7.429	1.6	222	240	1	215	3	0.96	1.148	1.086	125	3.15	182.1	4.6	20.5	727	715	166	6.61	5.28	0.549	1538	1861	53.4
60994	NO	2208	299.48	25.4	88.92	79.97	24.856	29.323	20.225	7.69	280	698	894	4403	366	1.628	2.386	2.032	544	5.3	167.3	5	92.1	953	1290	469	18.63	15.38	2.252	3845	4118	109.4
60995	NO	1713	185.09	19	102.04	63.61	17.431	23.982	14.454	4.62	9807	9887	28	873	149	1.821	5.675	2.432	632	105.43	30.6	3.2	55.7	445	1460	239	18.69	14.17	19.145	4166	2224	153
61006	NO	1735	153.54	13.6	84.92	89.04	31.778	33.722	16.119	5.53	200	387	664	1827	173	2.166	1.51	1.479	264	4.69	114.5	2.2	50.8	805	1156	211	8.66	11.54	1.134	3896	2463	106.3
61007	NO	2407	324.39	15.7	75.41	93.42	30.05	28.516	25.445	12.34	1160	1220	10	698	62	2.571	3.894	3.347	976	14.29	64.5	10.9	66.4	1280	1666	313	29.54	19.58	1.135	3946	2844	95.4
61009	NO	978	124.39	7.3	52.68	30.32	9.905	12.501	5.133	1.69	191	197	15	64	4	1.166	1.685	1.076	142	2.04	6.3	3.4	13.4	436	804	155	6	5.28	0.442	1664	1556	87.8
61020	NO	3152	391.02	12	150.63	108.4	37.228	36.896	20.578	5.29	507	530	47	249	11	2.072	2.15	2.498	554	3.91	33.5	4.1	24.3	732	1712	304	21.09	16.63	1.166	5093	2615	176.1
61026	NO	2091	267.4	11.8	106.74	66.49	17.4	25.181	17.621	7.48	21	77	59	616	44	1.644	1.67	1.832	359	4.32	82	0.3	35.9	354	1195	248	16.54	15.01	1.224	3510	2184	132.9
61029	NO	1219	194.44	8.4	53.14	28.92	17.686	7.874	1.59	1.51	1042	1892	3513	8470	31	1.974	4.37	3.172	422	13.17	76.1	19.4	18.2	1824	1405	234	18.96	7.46	0.59	1270	2826	44
61048	NO	3020	290.46	18.1	123.37	123.44	47.767	42.448	21.967	11.12	1478	1582	3	1279	21	2.941	4.757	3.976	730	10.31	47	14.3	173.7	1620	2359	433	21.55	17.99	1.694	5206	4990	202.7
61049	NO	4518	653.21	31.1	155.98	150.58	44.642	57.552	38.225	16.15	1394	1938	2104	5481	1	2.791	4.09	3.296	579	5.7	84.8	8.6	131.5	2132	2860	536	29.91	20.74	2.8	8770	5601	184.3
61052	NO	1581	99.95	4.6	52.87	55.4	21.463	19.48	5.37	2.64	126	140	0	182	0	0.899	2.433	1.275	281	3.22	5.1	0.9	17.3	512	964	253	9.14	8.91	0.748	2706	2155	70.6
61053	NO	890	109.78	10.7	27.38	39.27	12.905	13.804	9.463	6.4	171	1317	0	13752	4	0.254	0.782	0.614	125	0.66	77.5	1.4	124.6	259	560	122	5.04	2.95	0.856	2040	1262	37.2
61061	NO	1684	229.47	16.6	33.04	44.9	16.337	15.268	10.132	8.26	288	879	1569	6232	150	1.189	1.378	1.92	388	1.2	384.8	3.2	67.3	633	905	337	10.25	6.23	2.288	2438	3484	41.9
61065	NO	1881	222.94	19.7	112.43	39.36	13.033	13.909	6.926	4.25	57	545	55	5829	13	1.073	1.317	2.879	434	3.35	32.5	0.5	341.3	618	1548	368	12.59	14.81	1.076	2430	2617	142.2
61071	NO	1360	103.47	16.6	79.71	73.77	17.342	34.918	15.548	11.6	180	443	520	2824	162	0.786	1.059	1.498	245	2.85	94.3	1.5	178.6	482	1114	339	10.96	13.85	1.732	2968	2346	93.4
61072	NO	932	115.03	2.4	31.98	37.21	7.301	14.916	11.971	3.32	24	31	30	30	101	0.684	0.441	0.826	218	0.64	125.4	0	23.3	89	363	90	4.78	3.06	0.46	1824	1059	44.7
61073	NO	2117	263.16	24.3	72.58	89.43	38.913	33.489	10.364	14.26	600	643	12	495	68	1.578	3.275	1.205	318	4.21	94.6	8.7	32.7	1413	1351	365	9.73	8.28	1.382	3054	3181	96.1
61078	NO	2802	265.33	28.8	143.43	131.3	51.266	42.02	20.501	10.31	829	974	100	1530	267	2.793	5.117	2.165	630	12.58	48.8	8.2	115	1869	2326	410	24.09	28.49	1.55	5317	5774	146.6
61079	NO	2965	415.39	36.1	99.83	112.82	48.378	38.992	17.397	11.24	243	325	28	938	63	1.186	2.553	1.912	212	5.61	262.4	4.1	40.4	1126	2305	549	16.45	20.3	2.122	2192	3624	107.8
61080	NO	3003	485.58	55.6	105.25	83.16	21.933	26.6	26.817	20.23	98	1556	4578	15031	289	2.75	3.462	3.696	993	1	413.4	0.5	489.5	1442	1998	680	22.11	11.87	2.852	6992	6881	170.5
61081	YES	2681	148.98	8.3	137.66	124.56	50.804	48.402	17.037	6.59	461	1079	2565	6118	1	2.57	3.423	2.555	386	7.61	11.6	8	69.5	1033	1904	365	10.04	12.84	1.257	5907	3140	207.9
61094	NO	2743	412.96	33.8	75.13	96.8	35.51	34.166	19.012	10.72	1104	2516	64	16829	169	3.484	3.963	3.929	982	10.17	152.9	11.6	45.7	1896	2021	428	35.21	17.13	2.197	3736	3933	108
61098	NO	907	80.97	4.1	30.1	26.93	10.827	11.056	3.116	2.82	158	189	3	319	44	0.694	1.493	0.585	183	0.82	18.9	0.6	13	269	453	119	7.06	3.58	0.329	1906	1388	52
61103	NO	2977	411.13	31.3	109.14	79.56	25.457	36.481	11.212	7.02	190	230	20	444	29	2.249	1.894	2.886	704	2.77	66	2.2	49.2	811	1838	404	21.22	11.57	1.649	4727	3794	168.5
61106	NO	2218	267.09	32	69.09	102.59	31.37	45.473	17.754	8.03	473	1319	3317	8513	66	1.474	1.964	1.876	504	3.49	80.2	6.5	143.6	1217	1429	281	10.6	8.85	1.278	2816	3798	72.2
61108	NO	1402	158.62	6.9	55.94	60.57	18.552	25.323	10.418	3.06	24	62	53	418	25	0.878	1.365	1.058	194	4.46	14.6	0.4	48.7	310	647	145	8.97	11.8	0.582	2026	1953	58.3
61123	NO	1295	153.06	9.8	58.66	50.69	18.403	13.87	9.701	5.11	451	466	34	88	131	1.112	2.356	1.2	300	3.29	62.2	6.5	18.6	653	1041	220	12.08	7.58	1.208	4067	2335	101.9
61126	NO	1566	252.17	52.5	69.6	41.76	10.11	12.625	13.14	9.92	101	1402	984	14915	387	1.667	2.406	4.319	760	5.78	371.8	1.8	928.2	904	1113	456	22.5	18.9	2.18	3522	5133	71.5
61131	NO	1306	111.67	6.9	93.2	55.06	19.95	23.08	4.83	3.06	5	18	38	139	2	0.416	0.893	1.907	126	5.08	11.7	0.6	21.4	302	797	190	10.7	15.87	0.718	1622	1795	99.4
61141	NO	2199	364.54	38.6	123.63	30.59	9.591	11.809	4.515	5.58	42	380	1058	3397	284	1.548	1.235	2.377	447	5.58	103.3	2.9	86.1	413	1434	397	17.53	22.02	1.897	4934	3967	148.9
61144	NO	575	31.88	1.3	20.81	40.99	11.319	16.16	9.998	2.5	11	11	0	2	0	0.42	0.904	0.396	30	1.12	3.5	0.7	6.1	42	221	66	2.01	2.55	0.258	859	945	1.4
61164	NO	1755	148.92	16.6	60.84	73.97	21.293	30.711	18.079	7.78	198	253	89	609	37	1.081	1.324	1.462	357	1.23	39.1	1.9	30.9	656	1221	304	9.92	7.27	0.976	3008	2742	76.8
61167	NO	1527	205.26	14.3	59.91	51.18	18.663	14.864	12.615	8.52	279	546	302	3017	36	1.431	0.975	0.891	523	2.09	77.2	2.2	181.8	1514	1162	238	12.4	7.28	1.116	4259	1807	103.3
61169	YES	1555	264.73	32.1	61.47	30.31	13.322	8.717	4.802	2.68	268	1203	4173	9094	37	1.07	1.325	1.403	379	1.47	30.1	3	53.1	735	1126	310	9.73	6.91	1.22	2584	2807	80
61178	NO	1979	235.48	13	79.12	80.18	26.074	30.335	17.275	6.26	358	404	62	476	56	1.291	2.041	1.229	223	4.02	50.9	0.8	53.2	534	1096	240	10.04	12.02	1.095	3529	2801	106.7
61181	NO	2287	220.29	11.2	114.15	105.68	34.983	39.13	22.683	9.08	551	586	30	421	12	1.709	1.867	3.451	296	5.7	14.4	4.8	53.2	740	1623	229	12.2	9.5	0.691	5854	2723	169.1
61185	NO	2375	346.97	36.8	91.29	75.24	16.69	28.745	16.27	7.51	65	263	635	1891	317	1.875	1.396	1.574	536	1.41	152.4	1.5	36.4	748	1241	407	15.43	10.61	1.539	2752	2660	115.4
61196	NO	4285	490.93	11.3	138.75	206.02	63.512	70.286	55.305	14.57	623	745	0	1446	17	1.705	9.043	10.224	525	28.96	52.5	5.5	81.1	1361	2312	363	18.76	17.2	1.653	8456	4522	161.6
61204	NO	2766	382.66	28.4	87.68	105.17	34.43	39.274	23.339	12.62	1524	1664	143	1477	276	2.441	3.783	3.438	568	7.19	68.8	5.5	74	1432	1911	363	32.17	21.25	1.698	3986	3860	120.5
61206	NO	3841	455.19	10.6	131.62	168.31	47.397	54.717	54.252	15.38	174	243	239	709	5	1.902	1.874	2.195	556	8.43	11.1	4.2	85.8	999	1813	332	16.42	8.38	1.031	4624	3247	226.5
61213	NO	2874	286.21	14.3	123.13	140.68	31.361	51.916	46.903	12.28	246	303	70	638	32	1.504	2.071	2.302	323	3.2	71.3	3.4	144.7	757	1456	332	15.35	13.6	1.418	4607	3272	148.6
61215	NO	6126	785.8	27.1	287.82	203.59	47.638	79.395	61.081	27.43	532	1208	2885	6561	229	4.173	3.331	4.609	508	23.96	123.6	13.2	168.5	1430	3839	713	25.38	19.75	1.786	8565	6599	514.6
61217	YES	1685	104.55	1.7	165.68	64.96	20.743	27.161	11.747	2.56	61	73	5	143	16	3.251	1.842	2.662	49	4.16	4	4.6	15.2	247	1907	208	11.08	19.84	1.141	8356	2844	211.8
61224	NO	1316	181.5	17.9	43.24	36.84	12.511	11.537	8.542	5.33	877	1483	2607	5935	21	1.57	1.42	2.408	343	1.76	56	1	36.8	424	739	229	18.26	6.69	0.885	1952	2082	75.6
61238	NO	2453	248.48	18.9	104.52	81.62	29.618	30.377	15.376	6.71	335	356	24	226	68	1.775	2.476	2.25	400	5.38	107.5	5.2	24	1525	1996	421	19.01	26.25	1.489	4105	3812	110
61242	NO	1827	248.54	2	30.29	17.16	5.76	4.596	4.96	0.89	67	71	0	39	5	0.535	0.847	1.185	177	1.1	0.1	2.3	11.9	565	903	171	4.35	2.6	0.261	1579	1129	48.3
61253	NO	1575	221.89	40.1	58.09	55.73	18.162	18.094	15.371	5.89	228	261	25	327	164	0.765	0.858	1.461	274	1.17	124.4	2.2	37.3	1165	1695	428	10.15	8.79	1.325	1887	2276	60.5
61259	NO	4774	611.23	20.7	132	205.25	82.637	70.768	36.987	15	1482	1533	60	517	146	3.591	5.07	3.359	1462	6.05	178.3	9.4	72.7	1746	2957	407	33.52	23.88	1.613	6780	4520	199.9
61261	NO	2963	214.29	21	134.85	166.57	46.798	69.9	37.274	11.04	825	1241	95	4958	38	2.986	3.315	2.83	478	6.03	237.1	10.7	316.7	1622	2219	386	16.9	19.84	2.027	5207	3773	192.8
61265	NO	1109	162.13	7.2	38.19	34.58	10.128	14.102	7.151	1.78	16	135	537	1168	0	1.3	0.958	0.804	144	1.57	10.6	0.7	28.6	259	484	123	7.58	5.58	0.551	1678	1273	52.1
61266	NO	1845	172.12	7.8	67.05	99.28	29.593	39.333	18.345	5.69	62	80	17	197	45	1.708	2.441	1.168	220	3.83	44.8	3.5	38.6	693	932	205	11.58	10.84	1.117	4586	2833	81.9
61273	NO	996	126.32	11	47.4	34.57	15.112	11.241	5.365	3.25	330	356	2	231	145	1.238	1.614	0.861	225	2.37	22.1	3	15.9	567	918	165	10.13	7.68	0.661	2105	1755	83.5
61276	NO	2283	285.27	15.8	93.67	84.21	21.059	31.913	24.854	9.82	274	383	243	1171	8	3.303	2.579	2.032	486	3.46	45.4	4	64	869	1767	257	21.2	9.46	1.249	6779	3229	164.4
61298	NO	2617	302.04	22.5	137.84	98.73	32.032	44.143	12.112	6.24	581	633	111	537	65	1.592	3.416	2.04	336	12.73	27.8	11.5	57.1	1551	2111	387	20.02	26.86	1.572	3351	4184	134.2
61311	NO	3368	373.17	17.9	104.45	109.65	37.878	41.281	21.04	18.29	831	888	0	699	0	2.271	4.289	5.255	842	15.21	215.1	5.5	62.3	888	1435	387	25.8	18.3	1.474	3825	4558	115
61322	NO	1569	145.9	18.1	73.87	79.06	31.382	28.419	12.715	5.54	222	1463	5360	12051	312	2.696	2.666	1.857	123	2.18	37.3	2.5	71.6	450	1082	239	7.52	8.48	0.746	1945	3388	77.1
61329	NO	3931	412.12	22.4	82.56	163.92	40.813	58.391	51.987	13.19	271	312	77	402	152	1.481	2.195	2.766	436	1.73	185.5	2.6	67.6	639	1644	444	14.17	10.01	1.62	5279	4468	109.6
61332	NO	1421	123.87	8.7	56.02	56.76	14.24	23.695	14.056	4.28	0	32	43	366	4	0.399	0.643	1.21	95	5.06	43.2	0.4	93.6	95	718	174	6.35	9.23	0.538	1451	1249	52
61333	NO	2351	382.01	6.7	28.85	82.61	16.226	31.182	30.854	9.4	143	488	1407	3433	4	0.801	0.915	0.728	191	0.89	102.4	0.8	67.1	387	583	104	7.94	3.16	0.523	1763	1680	44.8
61336	NO	1747	210.28	11.1	73.53	47.9	18.931	16.154	7.263	3.23	71	179	22	1225	167	0.905	1.127	1.612	237	3.82	145.2	0.4	15.7	470	805	222	9.11	13.68	1	1619	2003	76.6
61338	NO	2566	266.46	28.6	142.14	92.82	30.909	32.124	20.124	6.09	607	706	44	1042	275	2.27	2.942	2.645	634	6.33	18.7	3.7	49.5	1058	1880	416	27.41	20.8	1.411	4229	3285	199.4
61343	NO	2819	214.02	8.4	119.8	105.12	36.338	40.951	17.478	9.98	298	383	165	932	3	1.16	2.101	3.95	354	8.61	184.2	8.8	58.2	456	1587	376	13.39	17.8	1.365	3756	4287	150.1
61353	NO	467	74.2	5.1	13.81	14.28	4.987	4.878	3.127	1.27	328	333	10	43	0	0.832	0.809	0.673	262	2.4	7.5	2.6	7.5	406	349	108	11.07	5.89	0.314	940	501	25.1
61360	NO	4121	471.09	17.7	167.29	178.33	62.105	71.092	29.88	8.69	434	580	13	1750	18	5.184	3.544	4.264	334	6.28	149.3	5.8	56.5	1506	2872	374	16.87	18.37	2.056	7759	6103	257.1
61366	NO	1233	146.66	9.5	58.39	46.07	15.517	15.943	10.225	3.74	474	566	303	911	100	1.539	1.798	1.307	384	3.62	11.1	7.4	20.4	1130	1075	189	11.57	9.79	0.724	2879	1859	87.2
61369	NO	3280	288.99	14.4	178.62	137.63	57.921	44.649	19.076	7.3	718	781	41	716	4	3.874	4.901	2.02	684	9.37	13.6	8.5	57.1	2335	3277	448	21.33	19.64	1.405	8812	5344	241.9
61372	NO	1284	266.5	1.8	37.83	11.92	3.957	3.352	2.288	1.31	226	236	5	102	33	0.407	0.687	0.548	62	5.13	3.8	9	5.7	458	815	88	4.51	2.45	0.177	935	941	54.9
61378	NO	945	94.11	3.4	55.44	38.24	12.081	15.058	7.204	2.16	24	68	0	530	1	0.711	0.598	1.128	132	3.79	33.2	0.8	11	163	687	126	7.75	7.31	0.823	2680	1304	81.3
61380	NO	1357	131.44	5.1	76.01	56.68	17.879	25.274	8.399	3.54	215	235	0	225	9	1.226	1.271	0.953	325	5.54	6	3.4	18.1	465	1015	132	13.64	13.11	0.695	2918	1445	121.5
61382	YES	3247	368.91	17.3	123.16	142.94	44.735	54.181	32.96	10.53	482	2660	151	26041	34	1.808	2.789	1.863	493	2.74	55.7	3.7	681.8	1395	1656	283	20.27	11.12	1.03	5014	2513	158.4
61396	NO	2187	238.02	15.5	97	94.65	19.985	40.704	26.097	8.67	423	725	1131	3050	35	1.407	1.496	2.163	325	10.99	77	7.3	115.3	764	1320	350	12.95	10.43	1.31	5283	2244	207.7
61411	NO	1950	299.73	20.1	62.22	60.25	20.843	19.283	13.859	5.03	982	1004	12	234	18	1.798	2.245	1.432	388	3.16	10.6	5.2	38.1	1337	1431	295	18.54	8.96	1.23	2714	1993	113.6
61414	NO	2095	268.49	19.9	95.28	74.97	21.187	31.491	15.581	8.12	630	777	484	1502	43	2.095	2.46	3.413	605	9	121.6	3.7	57.9	656	1528	353	31.01	19.18	1.408	3418	3838	113.9
61422	NO	2429	294.22	19.3	92.01	90.18	27.388	29.728	26.427	7.8	465	495	0	349	16	2.127	1.735	1.146	625	5.52	4.7	3.2	69.7	769	1590	268	16.95	9.11	1.264	4991	2062	172.3
61435	NO	2496	415.1	19	52.66	75.64	25.234	23.581	18.762	7.51	366	809	1763	4417	2	1.563	2.249	1.953	408	0.98	246.8	0.8	102.1	693	1470	264	11.89	6.99	1.045	4176	3568	95.9
61447	NO	3741	487	17.7	131.61	143.22	51.276	50.398	16.23	7.38	415	475	0	693	2	1.746	2.577	1.479	333	10.19	13.6	1	60.4	1351	2021	287	24.52	23.55	2.038	5665	3053	191.9
61459	NO	3359	578.06	33.2	95.94	87.08	19.741	31.769	23.81	9.18	4177	4237	0	728	0	6.675	8.806	7.613	948	3.7	1617.8	0	69.7	1497	2098	504	26.32	10.84	2.152	6089	4342	186.3
61460	NO	1441	182.96	11.7	58.53	53.84	17.032	23.745	7.375	2.92	55	90	47	381	28	1.596	1.222	1.094	232	3.73	34.6	0.6	27.2	544	1192	139	12.93	8.17	0.961	4054	1501	64.2
61476	NO	1922	317.57	9.3	52.71	55.34	12.246	21.533	15.419	7.73	23	75	0	540	202	0.413	0.739	0.616	88	5.62	21.1	0.8	45.2	195	1028	137	8.4	3.62	0.693	1777	2027	41.9
61478	NO	5381	689.2	34.3	189.85	167.25	72.294	51.547	23.075	7.34	1050	1075	4	308	10	4.777	5.81	6.253	926	17.75	23.5	7.9	55	1467	3570	707	45.12	31.45	3.541	9383	6108	224.7
61479	NO	1493	154.44	13.8	70.96	65.26	19.239	24.598	16.003	6.93	310	341	16	357	24	1.177	1.616	1.239	376	2.74	20.8	3.1	41	809	1108	283	12.18	10.54	1.266	2821	2293	112
61486	NO	2039	184.2	10.2	92.21	105	30.578	40.851	26.459	6.69	453	510	58	607	149	1.057	1.984	2.301	352	2.85	139.5	5.2	43.9	749	1567	233	10.13	7.86	0.859	3781	2683	117.2
61514	NO	1192	195.9	13.2	36.67	34.91	15.43	10.681	5.205	2.45	555	596	29	335	273	0.919	1.917	1.485	219	5.41	76.2	6.1	14.3	846	949	200	8.25	6.6	0.623	1367	2114	30.7
61531	NO	2000	57.46	8.2	175.5	116.75	35.716	47.256	21.283	8.87	444	494	55	559	28	1.135	2.276	3.325	195	9.84	36.8	7.3	55.9	824	1749	317	17.41	28.42	1.311	3805	3214	233.9
61532	NO	1758	273.5	4.5	45.91	55.63	25.654	15.969	7.741	1.61	359	369	0	69	0	0.951	1.781	0.601	171	4.26	11.6	10.1	8.5	1586	1259	170	6.6	6.17	0.623	2223	1675	65.7
61533	NO	2660	323.75	28.2	135.38	92.08	27.096	36.536	19.078	6.7	349	370	46	198	52	1.792	3.317	2.283	398	5.85	23.7	7.3	58.5	1510	2115	383	18.99	18.02	1.576	3921	3696	162.7
61540	NO	1898	258.31	21	52.74	80.6	14.742	25.671	35.756	15.65	72	2215	8884	21091	360	0.912	1.433	2.672	321	2.48	215.3	0.2	108.5	269	772	254	8.82	9.6	1.095	2924	4529	76.1
61550	NO	2291	308.81	14.6	74.84	85.97	30.492	30.411	18.576	6.84	310	350	0	450	0	2.815	5.137	1.692	612	6.15	8.5	0	49.7	951	1297	244	16.95	8.31	0.947	4053	2249	133.6
61555	NO	2467	337.21	16	74.12	97.32	40.581	35.377	10.801	3.38	237	254	0	221	4	1.296	1.27	0.864	370	3.49	18.9	4.5	20	1408	1517	265	19.16	23.61	1.262	5067	2893	91.7
61565	NO	1862	200.67	19.4	55.52	100.47	26.959	48.019	19.052	15.52	400	407	1	103	1	0.761	1.438	0.852	163	3.31	116.4	9.7	47.7	676	1312	480	11.43	8.68	2.094	2057	2011	52.9
61572	NO	1653	249.24	13.7	76.34	40.64	10.74	13.988	11.39	4.22	583	596	7	148	16	1.579	1.995	2.06	437	3.86	47.4	6.6	22.8	941	1288	290	18.76	10.63	0.996	2511	1778	129.9
61585	NO	2968	438.65	25.6	92.74	98.7	33.07	35.873	21.742	6.85	201	272	98	767	131	1.62	1.842	2.707	350	2.5	70	3.7	110.4	805	1723	379	18.52	21.12	1.915	5964	3875	128.7
61591	NO	1765	312.27	24.9	38.61	44.13	9.216	14.484	16.97	5.43	133	177	14	489	71	1.436	0.952	1.481	318	1.03	54.4	2.7	48.8	458	849	304	10.65	6.48	1.538	2842	2034	93.8
61602	NO	2451	328.37	14.3	95.29	85.53	38.804	27.215	10.318	3.84	1059	1097	25	409	1	3.21	4.55	3.111	533	12.3	27.7	10.6	36.8	1862	2061	269	28.09	10.56	1.202	4284	2647	172.2
61603	NO	1478	181.3	13.1	59.69	58.62	20.26	22.512	10.548	7.47	525	651	120	1438	37	2.264	3.033	2.391	465	6.83	26.8	7.5	77.6	745	1025	209	20.67	7.28	0.837	2899	2631	109.4
61609	NO	1614	195.38	9.6	42.42	44.27	8.424	14.76	16.976	7.16	217	654	324	4988	178	1.4	1.4	1.236	290	6.13	139.6	1.5	689.5	581	669	188	13.72	27.19	2.467	2895	2140	78
61618	NO	4283	484.03	22.4	141.43	171.95	56.853	61.908	35.038	15.07	676	722	6	519	21	2.718	3.077	2.017	581	6.06	24	4.9	94.1	1439	2543	408	31.11	16.36	2.522	7084	3582	293.1
61625	NO	1853	157.8	11.4	97.6	92.71	32.86	35.701	15.111	7.86	573	581	0	98	0	1.756	2.243	3.416	670	9.79	58.4	2.8	24.4	1147	1360	183	20.76	11.76	0.905	4121	1608	147.7
61626	NO	4411	631.07	17.9	177.71	138.38	57.447	49.755	18.56	7.83	353	411	21	668	6	1.98	4.245	1.867	612	9.18	29.6	2.6	43.9	1474	2188	529	28.54	27.11	2.688	5103	5223	267.8
61637	NO	3127	408.12	27.9	104.18	69.72	15.235	20.579	26.357	7.62	58	133	115	786	162	1.58	1.514	3.356	329	4.96	49.2	6.1	73.8	670	2010	536	15.99	10.45	1.564	3636	3158	195.5
61650	NO	2553	347.3	19.1	77.71	93.51	48.772	28.302	9.767	4.63	1238	1274	37	323	195	2.76	4.065	2.786	482	6.89	89.3	10.7	30.6	1530	1643	392	17.12	14.51	1.335	2991	4545	91.5
61653	NO	4764	369.13	28.2	158.79	269.75	105.979	99.393	42.609	11.72	869	1104	123	2677	21	2.045	3.158	2.18	673	12.59	47.3	4	286.6	1185	2166	403	28.15	28.58	1.573	5694	3821	206.7
61654	NO	2935	407.6	56.4	136.74	90.27	20.942	33.438	28.851	11.29	362	717	1235	3081	1151	1.58	2.259	2.764	554	5.76	170.3	5.4	76.7	1103	2711	614	23.38	23.2	1.988	5022	4318	170.7
61655	NO	1172	154.89	6.1	37.69	37.07	15.745	14.702	2.915	1.97	189	205	37	190	12	1.187	2.628	1	208	3.22	16.4	4.3	12.8	625	681	205	6.04	5.76	0.543	2327	2479	39.7
61661	NO	2597	232.41	13.7	101.12	140.73	43.541	51.224	33.269	11.44	423	819	250	4591	56	1.707	2.235	1.628	367	6.62	34.1	6.2	87.9	1162	1448	245	14.56	13.23	1.103	4362	2804	172.4
61663	NO	3686	197.48	39.3	168.21	253.94	92.142	97.41	39.285	22.82	1070	1732	497	7275	813	1.889	3.297	5.098	594	13.55	455.4	39.9	342	2121	3427	879	17.58	19.42	4.099	4425	7053	202.9
61664	NO	1562	151.33	12.2	60.66	38.69	12.185	13.872	9.046	8.97	371	436	89	607	321	0.899	1.549	1.165	354	2.81	70.3	4.4	606.7	667	994	288	10.13	9.83	1.588	1931	2334	98.1
61666	NO	3714	435.01	25.1	180	145.72	33.457	54.82	46.757	13.94	257	562	774	3214	40	4.544	3.407	4.727	546	9.45	146.2	26.3	194.5	531	2509	468	20.11	16.12	2.48	10393	6013	257.7
61672	NO	7301	598.41	29.1	308.16	406.09	100.456	161.31	110.97	38.32	1243	1365	58	1342	155	3.693	5.618	6.215	978	31.67	38.5	18.8	319.8	1740	4636	742	40.37	34.51	3.06	12861	9011	422.1
61686	NO	3074	464.27	9.4	107.56	89.92	36.874	29.975	12.483	4.38	705	743	159	432	0	2.054	6.321	10.935	298	18.66	3.6	16.4	21.7	1869	2095	302	16.06	15.95	1.036	4025	3361	167.5
61687	NO	1223	115.67	7.1	57.74	58.47	23.775	22.699	4.638	0.9	390	392	0	28	4	1.783	1.503	1.092	414	5.91	11.4	3.9	10	822	941	133	18.13	13.22	0.434	2850	1187	80.8
61699	NO	3385	480.1	13.8	176.2	84.04	19.639	33.505	22.936	6.87	44	64	78	78	264	3.251	1.891	4.001	645	3	328.1	9.6	45.1	2218	2181	433	14.18	18.24	1.84	5412	5011	243.5
61706	NO	1579	192.59	15	86.6	51.92	21.497	19.34	5.85	5.23	502	799	57	3548	16	1.364	2.45	1.565	492	6.66	62.9	10.7	237.3	1643	1462	285	21.49	12.9	0.982	2736	2918	96.7
61713	NO	2410	267.03	40.3	83.95	46.89	8.684	18.432	15.309	9.1	718	1391	2660	6744	2	2.423	3.76	9.938	1073	16.52	96.2	9.2	109.5	1214	2049	656	22.19	21.74	2.096	3131	4202	79.3
61716	NO	1343	119.38	0.2	16.24	2.99	1.703	0.754	0.178	0.08	41	42	0	6	0	0.195	0.944	1.355	179	0.91	0	1.2	0.5	245	482	193	0.65	0.73	0.242	184	943	20.8
61717	NO	2108	300.63	25.9	79.76	59.26	14.977	21.798	17.202	6.72	221	281	80	549	283	1.288	2.065	2.477	322	1.96	139.1	3	55.6	618	1256	328	9.44	8.53	1.316	3302	3457	108.7
61725	NO	2724	348.97	27.7	138.15	90.57	27.622	38.025	18.831	7.95	255	807	2432	5303	249	2.957	2.532	2.993	501	3.33	141.3	6.6	61.2	1303	1775	390	17.57	12.09	1.782	5563	3855	214.5
61727	NO	1535	226.97	26.7	56.86	47.69	20.89	16.469	6.263	18.53	1023	1178	463	1666	3	1.509	2.868	1.687	313	2.65	98.5	2.7	36.1	938	1286	348	14.15	10.36	1.547	2356	3263	73.4
61738	NO	2952	368.14	14.4	107.8	118.99	35.158	50.608	19.952	5.78	285	306	27	236	34	1.876	6.737	7.693	440	22.68	13.3	1.4	56.3	446	1182	208	15.85	16.64	1.019	4770	2198	116
61753	NO	2285	199.91	12.9	125.56	76.72	21.397	29.242	19.429	5.97	425	570	21	1671	99	1.299	1.967	2.295	356	2.5	41.4	3.6	88.5	878	1658	278	14.12	11.62	1.209	4766	2371	148.6
61755	NO	1710	283.67	19	54.35	43.73	13.54	17.942	8.618	3.54	95	126	51	299	61	1.701	2.834	6.762	267	7.32	93.7	1.8	30.5	501	861	229	9.2	7.75	0.914	2648	2863	75.8
61764	NO	1583	200.67	8.5	67.23	56.02	16.59	21.551	12.117	5.13	271	277	0	65	12	1.255	1.531	1.326	229	5.56	36.3	3.6	30	540	836	170	12.47	11.71	0.744	2012	1535	110.1
61770	NO	1448	204.95	25	73.9	28.35	10.031	8.826	6.764	2.83	202	236	39	378	17	1.103	1.478	2.181	292	3.55	43.3	4.1	42.5	1161	1377	370	10.53	11.71	1.218	1958	3155	80.4
61773	NO	1310	142.95	13	54.56	61.05	14.735	27.59	14.342	3.38	242	282	52	461	16	1.087	1.333	0.92	256	1.73	16.7	3.7	35.8	786	1030	187	8.57	7.01	1.113	2470	1881	77.9
61775	NO	3352	536.24	20.7	85.19	100.18	41.89	32.397	16.326	9.71	419	460	31	422	104	3.239	2.635	0.972	859	2.45	131.5	4.5	57.9	1353	1715	304	29.84	9.23	1.65	4137	2266	170.8
61777	NO	2435	357.67	16.4	68.82	84.52	25.366	31.826	19.948	9.85	334	398	56	694	62	1.452	1.609	1.566	414	2.23	142.1	4.3	52.7	1071	1172	259	12.45	7.97	1.033	3499	2630	131.4
61792	NO	2029	256.21	10.2	68.61	83.91	25.393	27.81	23.912	6.76	455	504	46	547	1	2.196	2.19	1.756	514	4.21	30.7	5.7	48.5	1230	1210	240	14.76	11.66	1.046	3783	2406	107.6
61795	NO	2838	347.27	29	117.53	113.2	36.961	43.42	22.881	12.06	821	956	221	1444	221	2.158	3.894	2.711	582	5.02	355.1	9.5	104.1	1994	2308	538	18.09	14.16	2.121	4970	5019	151.1
61801	NO	2300	433.27	22.1	35.01	36.35	8.727	16.466	8.473	7.9	98	335	1415	2139	5	1.378	3.094	8.569	477	8.03	100.9	1.1	48.4	360	684	355	11.95	6.24	1.223	3445	4040	51.9
61805	NO	3583	379.97	69.1	118.4	183.87	27.019	97.347	49.363	35.15	252	414	0	1972	0	1.508	2.326	3.092	901	3.87	114.1	4.8	298.7	1045	2513	1056	25.55	20.19	5.733	3762	5977	55.2
61809	NO	303	24.57	2.3	23.09	12.13	3.307	4.303	3.377	1.12	40	41	0	17	0	0.191	0.291	0.72	16	0.65	11.9	0.2	11.9	51	244	46	1.24	2.71	0.281	734	674	23.5
61812	NO	2366	288.81	11.3	80.94	101.03	35.622	37.789	18.508	5.82	293	310	1	185	2	1.969	1.377	2.918	166	4.82	20	1.9	40.3	315	1488	199	11.19	9.06	0.945	3783	3152	127.2
61817	YES	4054	238.51	31.3	144.09	122.02	36.655	50.726	26.571	9.15	265	1894	9	19509	36	3.048	3.444	2.783	620	3.6	35.2	5.8	64.3	739	2131	470	16.45	13.93	2.025	4723	4929	230.9
61839	NO	3333	397.22	16.7	111.53	147.95	34.059	62.563	39.723	9.8	54	76	78	99	276	2.822	1.751	2.723	620	3.59	334.5	1.8	44.8	850	1835	303	16.49	8.07	1.43	6290	3514	145
61855	NO	3791	493.63	42.5	150.18	147.71	52.139	54.287	27.38	8.32	1419	1449	2	322	22	3.904	5.248	4.792	1072	13.96	15.1	10	55.1	1467	2573	598	46.81	21.52	2.372	5032	3568	189
61864	NO	2134	307.58	12.8	97.02	57.87	21.106	23.256	7.472	4.82	221	1335	66	13289	161	1.36	2.966	1.451	296	5.81	115.5	2.5	24.5	548	1285	196	16.64	23.22	1.011	3826	2628	127.5
61874	NO	1057	95.5	3.2	50.41	51.75	18.866	24.147	4.626	1.21	0	0	0	1	1	1.021	0.664	0.711	138	3.16	14.8	0.9	2.4	343	536	130	7.53	9.08	0.318	2618	954	73
61875	NO	2258	324.92	10.6	73.44	77.95	21.236	33.977	17.347	5.24	186	275	20	983	219	1.857	2.994	1.768	215	2.62	36.2	3.5	39.4	731	1242	258	10.79	8.26	1.094	4490	3287	96.4
61878	NO	3287	484.04	30.6	93.99	117.69	35.389	46.144	27.74	17.01	554	872	563	3330	453	1.874	3.404	1.663	488	2.37	119.8	4.2	109.5	1147	2043	462	17.03	12.78	2.296	4279	4871	129.9
61890	NO	2889	370.99	11.9	59.99	132.17	43.241	59.396	17.045	7.8	111	126	8	167	25	1.703	1.8	0.828	374	3.23	56.6	2.6	40.7	602	1296	340	15.17	8.86	1.194	4805	2203	84.7
61893	NO	2851	217.46	5	166.14	135.07	37.716	50.435	30.984	3.78	625	650	37	271	66	2.13	2.854	3.848	432	7.37	20	5.8	20.1	917	1471	249	22.8	13.42	0.911	4825	2097	171.4
61903	NO	6505	703.51	39.5	203.63	291.61	81.401	112.03	74.511	32.9	645	806	63	1754	206	5.066	5.357	5.386	1416	7.4	304.2	17.8	231	2893	3235	698	30.94	22.4	2.94	9188	8680	299.4
61904	NO	1860	184.36	12.2	82.29	55.7	17.34	19.669	11.365	7.58	139	1245	122	13210	0	1.415	1.562	2.721	532	3.04	47.6	1.2	1020.2	722	1065	405	14.28	7.43	1.054	4161	2638	135.4
61924	NO	866	155.88	6.3	18.78	17.92	3.596	5.013	8.074	1.84	30	32	0	30	4	0.942	0.549	0.634	273	0.24	8.6	0.2	16.2	282	274	104	7.11	2.36	0.611	1766	907	49.2
61943	NO	3044	319.92	13.3	102.36	152.33	41.72	53.303	43.789	9.27	187	203	4	174	17	1.882	1.657	1.516	486	3.37	18.7	1.8	88.4	726	1655	236	15.88	8.58	0.994	4573	1984	144.3
61947	NO	2811	305.06	23	107.82	113.99	48.401	39.378	14.395	5.5	684	715	23	344	68	1.778	3.031	2.156	411	6.39	22.6	10.6	62.7	1768	2011	388	21.67	14.28	1.326	4584	3532	136
61948	YES	1998	222.72	24.5	89.24	73.17	27.179	25.131	16.095	6.58	573	640	60	770	82	1.09	2.249	1.502	315	5.52	72.9	12.4	80	1510	2001	349	10.88	10.59	1.12	3528	3362	101.6
61962	NO	1217	177.78	9	45.9	34.89	9.291	11.326	12.382	5.02	127	161	31	371	46	1.986	1.148	0.9	325	0.78	35.8	0.9	46.9	271	615	139	13.68	6.09	0.812	3322	1303	65.1
61968	NO	1318	166.68	13.7	56.54	46.64	10.986	18.113	12.923	9.69	183	264	12	955	50	1.422	1.466	1.403	331	1.63	66.6	2.7	59.9	358	758	205	10.12	7.19	1.022	2565	2186	135.6
61974	NO	5078	616.27	37.5	161.44	229.5	85.804	82.835	41.352	14.89	660	827	562	1714	27	3.15	5.034	2.811	767	9.5	80.1	10.5	120.8	2206	2700	722	31.12	23.01	3.063	5816	5919	202.1
61979	NO	5332	419.5	20.5	131.86	174.62	38.397	70.171	56.002	19.06	218	1013	3293	7916	9	2.13	2.021	4.075	409	7.29	41.4	3.1	178.9	515	1464	339	19.08	21.44	1.811	4410	4057	165
61981	NO	2444	332.8	18.8	94.08	74.56	22.207	32.494	13.503	6.95	340	735	69	4545	313	2.785	2.478	1.503	680	4.84	100.9	4	52.1	557	1373	240	21.34	12.31	1.295	3479	3090	180.3
61983	NO	1465	196.79	14.3	77.55	42.57	12.209	13.46	12.247	3.12	35	128	127	1035	14	0.535	0.667	1.948	212	1.68	28.6	0.4	71.6	456	1050	238	7.94	8.62	0.67	2231	1925	89
61986	NO	1944	236.61	13.9	71.6	54.66	18.833	21.489	8.868	3.47	222	256	4	388	29	1.152	2.068	1.834	318	4.61	38.8	3.4	41.6	892	1241	283	10.76	13.2	1.061	2718	3119	82.8
61987	NO	1177	172.52	18.8	54.2	26.96	6.947	9.417	9.441	6.43	854	1684	2598	8648	22	2.123	4	2.633	628	8.29	158.4	12.3	237.3	1621	1337	273	19.92	7.61	0.945	2942	4042	45
61989	NO	4149	467.87	56.1	157.58	198.81	27.689	82.212	72.834	13.67	71	531	1824	4558	13	3.392	12.322	10.531	546	19.18	102.4	1.3	215.3	817	2750	692	25.73	13.93	3.126	7605	5687	195.7
62005	NO	3550	221.57	9.1	151.25	130.83	71.159	37.154	10.183	4.03	1045	1063	18	219	0	1.816	2.816	4.327	520	15	15.4	5.9	15.6	654	1683	339	19.02	22.77	0.864	3517	2938	177.5
62019	NO	1575	134.99	9.2	67.03	85.78	31.678	31.529	16.518	7.17	577	628	15	554	105	0.908	2.42	1.258	272	4.04	93.1	5.4	39.2	1075	1264	214	10.51	8.32	0.865	2926	1942	87.7
62027	NO	1798	194.24	8.9	79.43	80.75	24.073	33.972	15.945	7.57	153	154	0	20	9	1.176	1.536	1.115	293	3.29	9.6	2.5	3.5	584	1013	197	15.74	11.62	0.746	2558	1541	105
62030	NO	2371	341.78	36.6	124.35	59.3	15.206	25.221	13.553	11.96	965	1476	1718	5205	152	1.857	3.447	2.918	466	13.29	146.6	30	202.3	2388	2757	566	16.81	15.01	1.978	6269	5971	142.6
62034	NO	2047	254.77	10.7	68.04	87.94	27.638	30.909	23.444	8.73	143	155	5	116	10	1.281	1.246	1.397	234	3.7	75.8	2.5	49.9	853	1230	206	12.35	11.49	0.963	3147	2826	80.9
62048	NO	1366	226.57	11.8	39.98	36.05	8.074	13.421	11.413	4.53	45	477	1561	4359	67	0.783	0.839	1.512	223	0.29	223.4	0.3	100.5	489	896	216	5.83	3.44	0.816	3105	2735	46.8
62049	NO	1854	161.88	12	87.12	96.89	26.117	39.658	25.184	15.05	167	361	676	1986	5	0.783	1.469	1.19	224	1.65	11.4	0.2	46.5	692	1068	317	8.78	8.63	1.275	2741	1774	97.3
62052	NO	1366	222.34	25.7	52.1	31.9	11.643	10.159	7.471	2.14	80	91	4	142	1	1.102	0.64	0.996	391	1.48	8.8	0.3	27.4	521	1159	276	10.78	8.29	1.055	2130	1651	62.2
62071	NO	1354	226.08	16.4	47.47	32.17	10.52	13.261	5.179	6.62	155	309	34	1648	436	0.684	1.03	0.78	185	3.45	164.1	4.1	40	652	766	212	10.77	7.05	0.959	2268	2296	57.8
62080	NO	2860	300.65	44.1	158.54	127.19	39.604	47.242	28.23	10.59	884	1992	89	13255	1	2.564	4.102	4.93	594	11	62.2	19.1	54.2	1404	2121	373	27.92	19.46	1.591	5036	3926	179.9
62081	NO	2055	200.41	6.9	67.64	100.03	44.944	32.423	13.519	4.66	533	596	98	709	10	1.311	1.221	1.03	329	4.02	27.5	2	39.4	355	746	202	13.22	11.2	0.611	2165	1338	97.6
62085	NO	2310	330.68	16.4	71.09	82.43	20.429	29.944	23.437	8.63	134	172	29	450	11	1.083	1.078	1.675	281	5.91	25.7	3.7	56.4	350	1121	302	11	6.64	1.226	3361	2901	119.5
62093	NO	1953	262.11	11.1	56.05	58.63	21.14	21.526	10.186	3.83	444	596	355	1612	28	1.639	2.367	1.682	371	5.75	100.6	3.9	36.2	776	969	226	17.42	12.39	1.13	2819	2172	80.3
62097	YES	1464	251.21	23.7	73.11	26.41	7.214	8.634	6.988	4.76	23	829	2510	8296	268	1.342	1.024	2.399	374	0.64	243.1	0.3	647.9	523	1174	360	11.29	6.11	1.217	3190	3209	114.1
62105	NO	1717	142.11	10	75.41	94.35	34.624	27.218	23.502	6.34	322	356	27	381	0	1.123	1.153	0.886	387	2.53	11.9	1.1	100.4	1084	1135	185	10	8.84	0.742	3465	1129	95
62120	NO	2230	480	5.2	22.55	31	12.56	11.159	4.641	2.94	0	1	3	9	0	1.602	0.58	0.155	203	0.43	79.3	0	17.9	218	551	418	10.75	2.44	0.793	4178	568	21.3
62122	NO	1050	136.32	9.3	40.23	41.31	12.772	16.78	8.28	4.71	404	549	77	1712	27	1.082	1.884	1.104	345	15.71	179.6	5.8	114.8	633	1076	214	12.43	5.96	1.044	1914	2199	51.6
62125	NO	1157	114.85	12.5	69.78	37.08	14.789	12.29	6.963	5.53	490	845	8	4263	25	0.856	2.36	2.465	277	6.22	115.3	9.2	335.8	929	1339	307	6.21	6.03	0.755	2381	2999	149.8
62126	NO	2274	340.64	24.4	86.1	59.83	17.782	20.877	12.917	5.73	268	279	23	106	90	1.157	1.397	1.804	486	2.39	108.9	6.4	24.2	1309	1533	314	12.64	8.21	1.048	2185	2573	105.7
62142	NO	1716	193.7	6.5	59.75	78.94	22.299	30.034	18.479	4.6	220	250	0	367	0	0.871	1.042	0.868	168	1.65	7.5	2.2	37.6	556	1099	134	7.96	6.71	0.553	2623	1027	91.6
62146	NO	2454	353.12	32.3	81.04	45.73	19.007	10.205	13.2	18.35	1413	1425	0	150	0	3.392	4.272	3.801	1108	11.66	124.6	10	37.9	1851	2126	400	42.36	10.42	1.288	4810	3819	113.1
62152	NO	2532	306.07	8.4	73.49	112.36	43.234	41.799	12.616	3.18	338	346	0	71	6	1.367	1.753	1.231	277	5.22	5.3	2.1	22.5	711	1420	174	12.66	12.5	0.679	3425	2210	89.7
62158	NO	1643	200.68	10.7	69.19	63.49	21.792	21.411	12.785	8.73	58	451	117	4637	58	1.07	1.441	1.246	262	2.24	64.4	2.9	53.6	484	779	180	14.68	8.16	0.905	3076	1762	128.5
